# Supplementary material for: Transcriptome Analyses Reveal Candidate Pod Shattering-Associated Genes Involved in the Pod Ventral Sutures of Common Vetch (Vicia sativa L.)
Source: Front Plant Sci. 2017 Apr 27;8:649. doi: 10.3389/fpls.2017.00649 (PMC5406471; doi:10.3389/fpls.2017.00649)
Supplement: Table S6 — A list of 1,285 differentially expressed unigenes (DEGs) in pod ventral sutures of shattering-susceptible and shattering-resistant vetch accessions. No. 135 and No. 392 are shattering-susceptible accessions. No. 92 and No. 257 are shattering-resistant accessions. FPKM refers to the Fragments Per Kilobase per Million Fragments mapped. GO refers to the Gene Ontology. COG refers to the Clusters of Orthologous Groups of proteins. KEGG refers to the Kyoto Encyclopedia of Genes and Genomes. KOG refers to the euKaryotic Ortholog Groups. Swissprot refers to the Swiss-Prot protein databases. Pfam refers to the Pfam protein database. nr refers to the NCBI non-redundant protein sequences. “–” Indicates that the unigene was not successfully annotated in the corresponding database. [file Table6.XLSX]

## Sheet: Sheet1
Table S6 A list of 1,285 differentially expressed unigenes (DEGs) in pod ventral sutures of shattering-susceptible and shattering-resistant vetch accessions. No.135 and No.392 are shattering-susceptible accessions. No.92 and No.257 are shattering-resistant accessions. FPKM refers to the Fragments Per Kilobase per Million Fragments mapped. GO refers to the Gene Ontology. COG refers to the Clusters…
Unigene ID	No.135 FPKM value	No.392 FPKM value	No.92 FPKM value	No.257 FPKM value	False discovery rate (FDR)	log2(fold change)	Unigene regulated	GO annotation	COG classification	COG classification annotation	KEGG annotation	KOG classification	KOG classification annotation	Pfam annotation	Swissprot annotation	nr annotation
c100042.graph_c0	2.45484	2.40733	0.307182	0.092724	0.000105164	-3.75636	down	--	--	--	--	--	--	--	--	hypothetical protein MTR_6g029260 [Medicago truncatula]
c100061.graph_c0	4.78885	5.08472	0.373722	0.71916	0.000174589	-3.21957	down	--	[G]	Carbohydrate transport and metabolism	K09874|1.11942e-160|mtr:MTR_8g087710|Aquaporin NIP1-2; K09874 aquaporin NIP (A)	[G]	Carbohydrate transport and metabolism	Major intrinsic protein	Nodulin-26 OS=Glycine max (Soybean) PE=1 SV=2	Aquaporin NIP1-2 [Medicago truncatula]
c100151.graph_c0	22.8927	19.3283	86.8103	96.5237	0.000155032	2.05013	up	--	--	--	--	--	--	--	--	hypothetical protein JCGZ_22036 [Jatropha curcas]
c100263.graph_c0	0.0725553	0.0764216	2.01858	0.874235	0.0033797	4.14293	up	--	--	--	K00430|0|cam:101514256|peroxidase 12-like; K00430 peroxidase [EC:1.11.1.7] (A)	--	--	Peroxidase	Peroxidase 12 (Precursor) OS=Arabidopsis thaliana (Mouse-ear cress) PE=1 SV=1	PREDICTED: peroxidase 12-like [Cicer arietinum]
c100266.graph_c0	2.83918	3.4728	0	0	6.95e-08		down	--	[O]	Posttranslational modification, protein turnover, chaperones	K08770|1.12851e-30|fve:101309063|polyubiquitin 9-like; K08770 ubiquitin C (A)	[OR]	--	Ubiquitin family;; Ubiquitin-2 like Rad60 SUMO-like;; Ubiquitin-like domain	Ubiquitin (Precursor; Fragment) OS=Hordeum vulgare (Barley) PE=2 SV=1	PREDICTED: polyubiquitin 9-like [Fragaria vesca subsp. vesca]
c100283.graph_c0	16.3022	13.9514	3.80458	3.93053	0.000786902	-2.04122	down	--	--	--	--	--	--	--	--	PREDICTED: uncharacterized protein LOC101490661 [Cicer arietinum]
c100333.graph_c0	116.323	76.8782	15.1568	14.0686	9.12e-10	-2.79494	down	--	--	--	--	--	--	--	--	--
c100567.graph_c0	0	0.0200179	0.919559	1.83198	0.00223866	6.98362	up	--	--	--	K06569|2.07688e-42|cvr:CHLNCDRAFT_59390|hypothetical protein; K06569 melanoma-associated antigen p97 (A)	--	--	Transferrin;; ABC transporter, phosphonate, periplasmic substrate-binding protein	--	hypothetical protein CHLNCDRAFT_59390 [Chlorella variabilis]
c100571.graph_c0	4.41738	2.5125	0	0.290324	8.77e-06	-4.51245	down	--	--	--	K13508|3.24462e-55|mtr:MTR_5g091660|ER glycerol-phosphate acyltransferase; K13508 glycerol-3-phosphate acyltransferase [EC:2.3.1.15] (A)	--	--	--	Glycerol-3-phosphate acyltransferase 1 GN=GPAT1 OS=Arabidopsis thaliana (Mouse-ear cress) PE=1 SV=1	ER glycerol-phosphate acyltransferase [Medicago truncatula]
c100686.graph_c0	11.2843	6.52973	0	0.5341	8.51e-08	-4.99578	down	--	--	--	--	--	--	--	--	--
c100687.graph_c0	0	0	5.37808	7.39893	1.56e-08		up	--	--	--	--	--	--	--	--	--
c100719.graph_c0	0	0	2.08859	1.9589	5.02e-08		up	--	--	--	--	--	--	--	--	--
c100737.graph_c0	0	0.0385732	9.03687	8.26367	2.51e-15	8.64167	up	--	--	--	--	--	--	--	--	--
c100761.graph_c0	5.36232	4.51112	0.842385	0.533982	0.000439233	-2.94703	down	--	--	--	K17911|5.11067e-149|cam:101500933|beta-carotene isomerase D27, chloroplastic-like; K17911 beta-carotene isomerase [EC:5.2.1.14] (A)	--	--	Domain of unknown function (DUF4033)	Beta-carotene isomerase D27, chloroplastic (Precursor) GN=D27 OS=Oryza sativa subsp. japonica (Rice) PE=1 SV=1	PREDICTED: beta-carotene isomerase D27, chloroplastic-like [Cicer arietinum]
c100883.graph_c0	6.67198	3.33156	0.119564	0.433089	0.000240231	-4.16083	down	--	--	--	--	--	--	--	--	--
c100941.graph_c0	5.50666	4.72601	0.493405	0.148936	2.15e-05	-4.14075	down	Molecular Function: protein serine/threonine kinase activity (GO:0004674);; Molecular Function: ATP binding (GO:0005524);; Biological Process: protein phosphorylation (GO:0006468);;	--	--	--	--	--	Protein tyrosine kinase;; Protein kinase domain	Cysteine-rich receptor-like protein kinase 29 (Precursor) GN=CRK29 OS=Arabidopsis thaliana (Mouse-ear cress) PE=2 SV=1	hypothetical protein MTR_116s1061, partial [Medicago truncatula]
c101032.graph_c0	0.115689	0.0609271	8.8862	8.87071	2.86e-10	6.59498	up	--	--	--	--	--	--	--	--	--
c101120.graph_c0	1.53182	4.21136	21.6697	13.9638	2.23e-07	2.48532	up	Molecular Function: oxidoreductase activity (GO:0016491);; Molecular Function: metal ion binding (GO:0046872);;	[Q]	Secondary metabolites biosynthesis, transport and catabolism	--	[Q]	Secondary metabolites biosynthesis, transport and catabolism	Cytochrome P450	Cytochrome P450 71A25 GN=CYP71A25 OS=Arabidopsis thaliana (Mouse-ear cress) PE=2 SV=1	cytochrome P450 family 71 protein [Medicago truncatula]
c101163.graph_c0	6.20611	6.35524	0	0.0944177	2.4e-08	-7.01467	down	--	--	--	--	--	--	--	--	--
c101283.graph_c0	21.8001	27.736	124.8	149.897	1.32e-05	2.39125	up	--	--	--	--	--	--	Dehydrin	--	cold acclimation responsive protein BudCAR5 [Medicago sativa]
c101292.graph_c0	485.642	472.305	250.388	125.777	0.00268235	-1.47309	down	--	[O]	Posttranslational modification, protein turnover, chaperones	--	[O]	Posttranslational modification, protein turnover, chaperones	DnaJ domain	Chaperone protein dnaJ 11, chloroplastic (Precursor) GN=T19K4.170 OS=Arabidopsis thaliana (Mouse-ear cress) PE=1 SV=2	PREDICTED: chaperone protein dnaJ 11, chloroplastic-like [Cicer arietinum]
c101303.graph_c0	0.0480049	0.202252	1.56782	2.5766	0.00591834	3.94933	up	Molecular Function: hydrolase activity, hydrolyzing O-glycosyl compounds (GO:0004553);; Biological Process: sucrose biosynthetic process (GO:0005986);; Cellular Component: chloroplast (GO:0009507);; Biological Process: response to abscisic acid (GO:0009737);; Biological Process: raffinose family oligosaccharide biosynthetic process (GO:0010325);; Biological Process: mannitol biosynthetic process …	--	--	K06617|5.65177e-166|mtr:MTR_3g077280|Galactinol-sucrose galactosyltransferase; K06617 raffinose synthase [EC:2.4.1.82] (A)	--	--	Raffinose synthase or seed imbibition protein Sip1	Galactinol--sucrose galactosyltransferase GN=RFS OS=Pisum sativum (Garden pea) PE=1 SV=1	RecName: Full=Galactinol--sucrose galactosyltransferase; AltName: Full=Raffinose synthase [Pisum sativum]
c101349.graph_c0	128.397	78.986	19.5693	12.0504	1.09e-06	-2.80703	down	Molecular Function: calcium ion binding (GO:0005509);;	[TZDR]	--	K13448|1.94008e-74|gmx:100806813|probable calcium-binding protein CML27-like; K13448 calcium-binding protein CML (A)	[T]	Signal transduction mechanisms	EF hand;; EF-hand domain pair;; EF-hand domain pair;; EF-hand domain;; EF hand;; Secreted protein acidic and rich in cysteine Ca binding region;; Uncharacterised protein family (UPF0154)	Probable calcium-binding protein CML27 OS=Arabidopsis thaliana (Mouse-ear cress) PE=1 SV=1	unknown [Medicago truncatula]
c101414.graph_c0	0	0	4.42433	7.87485	0.000336239		up	Biological Process: metabolic process (GO:0008152);; Molecular Function: transferase activity, transferring hexosyl groups (GO:0016758);;	--	--	--	[GC]	--	--	Anthocyanidin 3-O-glucosyltransferase 1 GN=GT1 OS=Manihot esculenta (Cassava) PE=2 SV=1	UDP-glucose flavonoid 3-O-glucosyltransferase [Medicago truncatula]
c101475.graph_c0	8.72855	10.1264	0.153018	1.10853	4.34e-05	-3.89483	down	--	--	--	--	--	--	--	--	--
c101558.graph_c0	0	0	2.12877	1.51465	5.51e-08		up	Molecular Function: catalytic activity (GO:0003824);; Biological Process: metabolic process (GO:0008152);;	[G]	Carbohydrate transport and metabolism	K15634|1.53947e-122|mtr:MTR_8g079760|2,3-bisphosphoglycerate-dependent phosphoglycerate mutase; K15634 probable phosphoglycerate mutase [EC:5.4.2.12] (A)	[G]	Carbohydrate transport and metabolism	Histidine phosphatase superfamily (branch 1)	Phosphoglycerate mutase-like protein 4 {ECO:0000305} OS=Arabidopsis thaliana (Mouse-ear cress) PE=2 SV=1	histidine phosphatase family (branch 1) protein [Medicago truncatula]
c101703.graph_c0	4.52477	3.05314	59.0085	47.6275	1.9e-13	3.73473	up	--	--	--	--	--	--	--	--	PREDICTED: uncharacterized protein LOC101505136 isoform X2 [Cicer arietinum]
c101822.graph_c0	2.9718	2.48571	0.211455	0.797857	0.00789341	-2.43626	down	Molecular Function: secondary active sulfate transmembrane transporter activity (GO:0008271);; Biological Process: sulfate transport (GO:0008272);; Cellular Component: integral component of membrane (GO:0016021);; Biological Process: transmembrane transport (GO:0055085);;	[P]	Inorganic ion transport and metabolism	K17469|0|cam:101510276|low affinity sulfate transporter 3-like; K17469 sulfate transporter 2, low-affinity (A)	[P]	Inorganic ion transport and metabolism	Sulfate transporter family;; STAS domain	Low affinity sulfate transporter 3 GN=ST3 OS=Stylosanthes hamata (Caribbean stylo) PE=2 SV=1	sulfate/bicarbonate/oxalate exchanger and transporter sat-1 [Medicago truncatula]
c101891.graph_c0	23.2682	19.6376	0.952073	2.04763	8.85e-16	-3.86686	down	--	--	--	--	[O]	Posttranslational modification, protein turnover, chaperones	Xylanase inhibitor N-terminal;; Xylanase inhibitor C-terminal	Probable aspartic protease At2g35615 (Precursor) GN=At2g35615 OS=Arabidopsis thaliana (Mouse-ear cress) PE=3 SV=1	PREDICTED: aspartic proteinase CDR1-like [Solanum tuberosum]
c101912.graph_c0	6.48362	11.4882	0	0	1.52e-06		down	Cellular Component: mitochondrion (GO:0005739);; Molecular Function: acetylglucosaminyltransferase activity (GO:0008375);; Cellular Component: membrane (GO:0016020);;	--	--	--	--	--	Core-2/I-Branching enzyme	--	PREDICTED: uncharacterized protein LOC101499387 [Cicer arietinum]
c101939.graph_c0	2.50871	1.72201	0	0	2.47e-09		down	Molecular Function: protein serine/threonine kinase activity (GO:0004674);; Molecular Function: calcium ion binding (GO:0005509);; Molecular Function: ATP binding (GO:0005524);; Biological Process: protein phosphorylation (GO:0006468);; Cellular Component: integral component of membrane (GO:0016021);; Molecular Function: polysaccharide binding (GO:0030247);;	--	--	--	--	--	Wall-associated receptor kinase galacturonan-binding	Wall-associated receptor kinase 2 (Precursor) GN=WAK2 OS=Arabidopsis thaliana (Mouse-ear cress) PE=1 SV=1	wall associated kinase-like protein [Medicago truncatula]
c101967.graph_c0	5.98719	4.27923	0.0323313	0.702672	1e-06	-3.75887	down	--	--	--	--	--	--	--	--	--
c102002.graph_c0	0	0.123324	43.763	53.2249	7.3e-20	9.47027	up	--	--	--	--	--	--	--	--	--
c102018.graph_c0	0	0	2.39307	2.25736	5.95e-08		up	--	--	--	--	--	--	--	--	--
c102026.graph_c0	0.102745	0	11.434	10.1291	2.43e-13	7.7075	up	Cellular Component: extracellular region (GO:0005576);; Molecular Function: manganese ion binding (GO:0030145);; Molecular Function: nutrient reservoir activity (GO:0045735);;	--	--	--	--	--	Cupin;; Cupin domain	Auxin-binding protein ABP19a (Precursor) GN=ABP19A OS=Prunus persica (Peach) PE=3 SV=1	Germin-like protein [Medicago truncatula]
c102119.graph_c0	92.7648	46.6718	8.66975	5.80646	0.00081391	-3.34853	down	Molecular Function: nucleic acid binding (GO:0003676);; Cellular Component: nucleus (GO:0005634);;	[A]	RNA processing and modification	K12581|5.09817e-153|mtr:MTR_8g098450|CCR4-associated factor; K12581 CCR4-NOT transcription complex subunit 7/8 (A)	[A]	RNA processing and modification	CAF1 family ribonuclease	Probable CCR4-associated factor 1 homolog 11 GN=CAF1-11 OS=Arabidopsis thaliana (Mouse-ear cress) PE=2 SV=1	unknown [Medicago truncatula]
c102200.graph_c0	25.1198	22.977	4.05138	7.09618	2.49e-05	-2.15268	down	Molecular Function: transporter activity (GO:0005215);; Molecular Function: ATP binding (GO:0005524);; Biological Process: glucose catabolic process (GO:0006007);; Biological Process: ATP catabolic process (GO:0006200);; Biological Process: transport (GO:0006810);; Molecular Function: ATPase activity (GO:0016887);; Biological Process: methylglyoxal catabolic process to D-lactate (GO:0019243);;	--	--	K06185|0|cam:101500997|ABC transporter F family member 1-like; K06185 ATP-binding cassette, subfamily F, member 2 (A)	[R]	General function prediction only	ABC transporter;; AAA domain;; ABC transporter	ABC transporter F family member 1 GN=MAE1.10 OS=Arabidopsis thaliana (Mouse-ear cress) PE=1 SV=1	PREDICTED: ABC transporter F family member 1-like isoform X1 [Cicer arietinum]
c102323.graph_c0	2.33678	2.82593	0	0	9.2e-08		down	Cellular Component: vacuole (GO:0005773);; Biological Process: cellular protein modification process (GO:0006464);; Biological Process: ubiquitin-dependent protein catabolic process (GO:0006511);; Biological Process: protein targeting to vacuole (GO:0006623);; Biological Process: vesicle-mediated transport (GO:0016192);; Molecular Function: ubiquitin-calmodulin ligase activity (GO:0050372);;	--	--	K08770|7.9704e-86|pop:POPTR_0011s00360g|polyubiquitin family protein; K08770 ubiquitin C (A)	[OR]	--	Ubiquitin family;; Ubiquitin-2 like Rad60 SUMO-like;; Ubiquitin-like domain;; DUF2407 ubiquitin-like domain	NEDD8-like protein RUB2 (Precursor) GN=T20F21.24 OS=Arabidopsis thaliana (Mouse-ear cress) PE=1 SV=3	hypothetical protein PHAVU_003G1236001g, partial [Phaseolus vulgaris]
c102331.graph_c0	7.69947	6.76877	0	0.332042	4.05e-08	-5.3981	down	Molecular Function: nucleotide binding (GO:0000166);; Biological Process: DNA metabolic process (GO:0006259);; Biological Process: cellular response to DNA damage stimulus (GO:0006974);; Molecular Function: kinase activity (GO:0016301);; Biological Process: phosphorylation (GO:0016310);; Molecular Function: phosphotransferase activity, alcohol group as acceptor (GO:0016773);; Biological Process: …	--	--	--	--	--	--	--	ataxia telangiectasia mutated protein, putative [Medicago truncatula]
c102524.graph_c0	2.63008	4.74896	0	0.0685939	0.000277837	-6.73046	down	--	--	--	--	[R]	General function prediction only	--	--	PREDICTED: uncharacterized protein LOC102660706 [Glycine max]
c102552.graph_c0	28.8429	27.1418	9.95262	8.41847	0.00970236	-1.69805	down	Molecular Function: DNA binding (GO:0003677);; Cellular Component: nucleus (GO:0005634);; Biological Process: regulation of transcription, DNA-templated (GO:0006355);; Biological Process: response to water deprivation (GO:0009414);; Biological Process: response to abscisic acid (GO:0009737);;	--	--	--	--	--	No apical meristem (NAM) protein	NAC domain-containing protein 55 GN=MJK13.16 OS=Arabidopsis thaliana (Mouse-ear cress) PE=2 SV=1	NAC transcription factor-like protein [Medicago truncatula]
c102560.graph_c0	0.0715331	0.30138	1.99014	3.2126	0.00767176	3.70093	up	Molecular Function: serine-type endopeptidase inhibitor activity (GO:0004867);; Cellular Component: extracellular region (GO:0005576);; Biological Process: proteolysis (GO:0006508);; Molecular Function: peptidase activity (GO:0008233);; Biological Process: negative regulation of peptidase activity (GO:0010466);;	--	--	--	--	--	Bowman-Birk serine protease inhibitor family	Seed trypsin/chymotrypsin inhibitor TI5-72 (Precursor) GN=TI572 OS=Pisum sativum (Garden pea) PE=2 SV=1	Trypsin inhibitor [Medicago truncatula]
c102607.graph_c0	9.50685	6.28503	0	0.110784	4.02e-11	-7.09652	down	--	--	--	--	--	--	--	--	--
c102719.graph_c0	0.0942279	0	3.76133	6.08973	0.000154488	6.7403	up	Molecular Function: protein serine/threonine kinase activity (GO:0004674);; Molecular Function: ATP binding (GO:0005524);; Biological Process: protein phosphorylation (GO:0006468);; Biological Process: recognition of pollen (GO:0048544);;	--	--	--	--	--	S-locus glycoprotein family	G-type lectin S-receptor-like serine/threonine-protein kinase RLK1 (Precursor) GN=RLK1 OS=Arabidopsis thaliana (Mouse-ear cress) PE=2 SV=2	lectin kinase family protein [Medicago truncatula]
c102732.graph_c0	0	0	1.521	2.0102	1.55e-08		up	--	--	--	--	[L]	Replication, recombination and repair	--	Zinc finger BED domain-containing protein RICESLEEPER 2 OS=Oryza sativa subsp. japonica (Rice) PE=2 SV=1	putative transposase [Medicago truncatula]
c102755.graph_c0	2.33614	1.89005	0	0.148346	3.02e-06	-4.78166	down	--	--	--	--	--	--	--	--	--
c102773.graph_c0	10.8244	10.3751	0.130935	3.79422	0.00119684	-2.39742	down	--	--	--	--	--	--	--	--	--
c102795.graph_c1	0	0	10.0897	9.1368	1.86e-09		up	--	--	--	--	--	--	--	--	--
c102829.graph_c0	16.5319	9.61854	0	3.96669	0.00344132	-2.65706	down	Molecular Function: ATP binding (GO:0005524);; Molecular Function: kinase activity (GO:0016301);; Biological Process: phosphorylation (GO:0016310);;	--	--	--	--	--	--	--	P-loop nucleoside triphosphate hydrolase superfamily protein [Medicago truncatula]
c102885.graph_c0	18.4572	25.5633	0.579901	2.42875	7.97e-07	-3.88868	down	Biological Process: response to molecule of fungal origin (GO:0002238);; Cellular Component: plasma membrane (GO:0005886);; Biological Process: response to stress (GO:0006950);;	[T]	Signal transduction mechanisms	--	--	--	Universal stress protein family	Universal stress protein A-like protein GN=At3g01520 OS=Arabidopsis thaliana (Mouse-ear cress) PE=1 SV=2	Universal stress protein A-like protein [Medicago truncatula]
c102906.graph_c0	6.88709	3.70421	0.53175	0.481532	0.000463712	-3.44952	down	--	--	--	--	--	--	--	--	--
c102980.graph_c0	2.49242	1.70945	0.140227	0.126984	4.06e-05	-4.04819	down	--	[TZDR]	--	K13448|8.12677e-57|gmx:100527117|uncharacterized LOC100527117; K13448 calcium-binding protein CML (A)	[T]	Signal transduction mechanisms	EF hand;; EF-hand domain pair;; EF hand;; EF-hand domain;; EF-hand domain pair	Probable calcium-binding protein CML44 GN=CML44 OS=Arabidopsis thaliana (Mouse-ear cress) PE=2 SV=2	unknown [Medicago truncatula]
c103130.graph_c0	9.68606	8.92208	2.36111	2.98531	0.00818662	-1.86296	down	Molecular Function: nucleotide binding (GO:0000166);; Molecular Function: nucleic acid binding (GO:0003676);;	--	--	--	--	--	--	--	RNA recognition motif 1 in plant MEI2-like protein [Medicago truncatula]
c103193.graph_c0	0	0	5.69771	4.39266	1.79e-09		up	Cellular Component: endosome (GO:0005768);; Cellular Component: Golgi apparatus (GO:0005794);; Cellular Component: trans-Golgi network (GO:0005802);; Molecular Function: methyltransferase activity (GO:0008168);; Biological Process: methylation (GO:0032259);;	--	--	--	--	--	--	Probable methyltransferase PMT11 GN=At2g39750 OS=Arabidopsis thaliana (Mouse-ear cress) PE=2 SV=1	PREDICTED: probable methyltransferase PMT11-like [Cucumis sativus]
c103239.graph_c0	9.11994	3.01581	0	0	0.00500296		down	--	--	--	--	--	--	Myb/SANT-like DNA-binding domain	--	PREDICTED: uncharacterized protein LOC101514034 [Cicer arietinum]
c103306.graph_c0	4.22906	1.95725	0	0	4.18e-05		down	--	--	--	--	--	--	--	--	--
c103327.graph_c0	7.12591	5.44159	0.430982	0.292711	1.7e-05	-4.21423	down	--	--	--	--	--	--	--	--	--
c103353.graph_c0	0	0	1.57724	1.30927	5.98e-08		up	--	--	--	K17871|1.43361e-15|mtr:MTR_4g091240|External NADH-ubiquinone oxidoreductase; K17871 NADH:ubiquinone reductase (non-electrogenic) [EC:1.6.5.9] (A)	[C]	Energy production and conversion	--	External alternative NAD(P)H-ubiquinone oxidoreductase B3, mitochondrial (Precursor) GN=NDB3 OS=Arabidopsis thaliana (Mouse-ear cress) PE=2 SV=1	NAD(P)H dehydrogenase B2 [Medicago truncatula]
c103362.graph_c0	39.175	58.9465	4.73869	4.29117	0.000170562	-3.54667	down	--	--	--	--	--	--	--	--	--
c103404.graph_c0	120.853	125.934	62.3768	24.9539	0.000248092	-1.63908	down	Biological Process: pattern specification process (GO:0007389);; Molecular Function: zinc ion binding (GO:0008270);; Cellular Component: chloroplast (GO:0009507);; Biological Process: response to carbohydrate (GO:0009743);; Biological Process: response to chitin (GO:0010200);; Biological Process: single-organism developmental process (GO:0044767);; Biological Process: meristem development (GO:004…	[O]	Posttranslational modification, protein turnover, chaperones	--	[O]	Posttranslational modification, protein turnover, chaperones	Ring finger domain;; RING-H2 zinc finger;; Zinc finger, C3HC4 type (RING finger);; Zinc finger, C3HC4 type (RING finger);; Zinc finger, C3HC4 type (RING finger);; Anaphase-promoting complex subunit 11 RING-H2 finger;; FANCL C-terminal domain	RING-H2 finger protein ATL80 GN=ATL80 OS=Arabidopsis thaliana (Mouse-ear cress) PE=2 SV=1	PREDICTED: RING-H2 finger protein ATL80-like [Cicer arietinum]
c103483.graph_c0	15.9027	11.2448	3.67685	5.6035	0.00828485	-1.58991	down	Molecular Function: oxidoreductase activity, acting on paired donors, with incorporation or reduction of molecular oxygen, 2-oxoglutarate as one donor, and incorporation of one atom each of oxygen into both donors (GO:0016706);; Biological Process: oxidation-reduction process (GO:0055114);;	[R]	General function prediction only	--	[QR]	--	2OG-Fe(II) oxygenase superfamily;; non-haem dioxygenase in morphine synthesis N-terminal	2-oxoglutarate-dependent dioxygenase DAO GN=OSJNBa0022H21.12 OS=Oryza sativa subsp. japonica (Rice) PE=2 SV=2	1-aminocyclopropane-1-carboxylate oxidase [Medicago truncatula]
c103499.graph_c0	13.1845	7.22126	3.09851	1.32042	0.00728993	-2.31832	down	Molecular Function: protein serine/threonine kinase activity (GO:0004674);; Molecular Function: ATP binding (GO:0005524);; Biological Process: protein phosphorylation (GO:0006468);;	--	--	--	[T]	Signal transduction mechanisms	Protein tyrosine kinase	Probable serine/threonine-protein kinase At1g18390 (Precursor) GN=At1g18390 OS=Arabidopsis thaliana (Mouse-ear cress) PE=2 SV=2	Tyrosine-protein kinase ABL [Medicago truncatula]
c103606.graph_c0	16.3996	17.9752	2.9136	2.07707	3.02e-06	-2.89175	down	Molecular Function: ATP binding (GO:0005524);; Cellular Component: cell wall (GO:0005618);; Cellular Component: cytosol (GO:0005829);; Cellular Component: plasma membrane (GO:0005886);; Biological Process: protein folding (GO:0006457);; Cellular Component: chloroplast (GO:0009507);; Biological Process: response to high light intensity (GO:0009644);; Biological Process: heat acclimation (GO:001028…	[O]	Posttranslational modification, protein turnover, chaperones	K03283|1.87779e-164|mtr:MTR_4g130540|Heat-shock protein; K03283 heat shock 70kDa protein 1/8 (A)	[O]	Posttranslational modification, protein turnover, chaperones	Hsp70 protein	Heat shock 70 kDa protein GN=HSP70 OS=Glycine max (Soybean) PE=1 SV=1	Heat-shock protein [Medicago truncatula]
c103610.graph_c0	4.22507	4.63062	0.276255	1.25083	0.00163891	-2.54122	down	--	--	--	--	--	--	ASCH domain	--	RNA-binding ASCH domain protein [Medicago truncatula]
c103628.graph_c0	1.131	0.680722	9.38108	5.04399	0.0019146	2.89202	up	Molecular Function: heme binding (GO:0020037);; Molecular Function: metal ion binding (GO:0046872);;	[CI]	--	--	[C]	Energy production and conversion	Cytochrome b5-like Heme/Steroid binding domain	Cytochrome b5 OS=Nicotiana tabacum (Common tobacco) PE=2 SV=1	Cytochrome B5 [Medicago truncatula]
c103648.graph_c0	0.120322	0	9.31482	3.75627	0.00016771	6.70916	up	Molecular Function: DNA binding (GO:0003677);; Molecular Function: sequence-specific DNA binding transcription factor activity (GO:0003700);; Cellular Component: nucleus (GO:0005634);; Biological Process: regulation of transcription, DNA-templated (GO:0006355);; Molecular Function: protein dimerization activity (GO:0046983);;	--	--	--	[K]	Transcription	SRF-type transcription factor (DNA-binding and dimerisation domain);; K-box region	MADS-box transcription factor 6 OS=Oryza sativa subsp. japonica (Rice) PE=1 SV=1	MADS-box transcription factor [Medicago truncatula]
c103682.graph_c0	10.684	6.13818	0	0.0886598	1.4e-09	-7.50361	down	--	--	--	--	--	--	--	--	--
c103697.graph_c0	2.45841	3.17997	0.208683	0.425195	0.000749615	-3.2019	down	--	--	--	--	--	--	--	--	--
c103778.graph_c0	0.0415681	0.0437831	13.3749	9.78959	2.74e-16	7.9799	up	--	[V]	Defense mechanisms	--	[Q]	Secondary metabolites biosynthesis, transport and catabolism	ABC-2 type transporter	Pleiotropic drug resistance protein 1 GN=PDR1 OS=Nicotiana tabacum (Common tobacco) PE=2 SV=1	drug resistance transporter-like ABC domain protein [Medicago truncatula]
c103851.graph_c0	8.77878	6.99523	0.600203	2.7176	0.00220148	-2.24164	down	Biological Process: metabolic process (GO:0008152);; Molecular Function: hydrolase activity (GO:0016787);;	[R]	General function prediction only	--	[R]	General function prediction only	Alpha/beta hydrolase family;; alpha/beta hydrolase fold;; Alpha/beta hydrolase family;; Phospholipase/Carboxylesterase	--	PREDICTED: epoxide hydrolase 4-like [Cicer arietinum]
c103884.graph_c0	6.87259	3.68618	0.0613521	0.88893	0.000253169	-3.4225	down	--	--	--	--	--	--	--	--	--
c103905.graph_c0	41.4536	31.0155	9.0488	3.18375	1.67e-08	-2.70041	down	Cellular Component: cytosol (GO:0005829);; Biological Process: protein folding (GO:0006457);; Biological Process: response to heat (GO:0009408);; Biological Process: response to high light intensity (GO:0009644);; Biological Process: response to endoplasmic reticulum stress (GO:0034976);; Biological Process: response to hydrogen peroxide (GO:0042542);;	--	--	--	[S]	Function unknown	Protein of unknown function (DUF775)	--	OPI10-like protein [Medicago truncatula]
c104014.graph_c0	0	1.16405	5.21361	3.75279	0.00227567	2.76258	up	--	--	--	--	--	--	--	--	hypothetical protein MTR_4g129770 [Medicago truncatula]
c104058.graph_c0	7.04334	3.09111	0	0.21431	0.00105516	-5.4892	down	--	--	--	--	--	--	--	--	--
c104059.graph_c0	0.995196	0.613597	0	0	5.98e-08		down	--	--	--	--	[R]	General function prediction only	gag-polypeptide of LTR copia-type	--	PREDICTED: uncharacterized protein LOC102660706 [Glycine max]
c104061.graph_c0	0.0571339	0	3.35185	8.54266	0.00758627	7.75921	up	--	--	--	--	--	--	--	--	hypothetical protein PHAVU_009G207400g [Phaseolus vulgaris]
c104095.graph_c0	3.31736	1.93292	0	0.0773145	4.74e-07	-6.0218	down	--	--	--	--	--	--	--	--	hypothetical protein glysoja_014698, partial [Glycine soja]
c104139.graph_c0	0	0	10.3928	2.91178	0.00287503		up	--	--	--	--	--	--	--	--	--
c104218.graph_c0	0	0	7.07367	6.40564	7.65e-10		up	Cellular Component: membrane (GO:0016020);; Molecular Function: transferase activity, transferring glycosyl groups (GO:0016757);;	--	--	--	--	--	Cellulose synthase	Cellulose synthase-like protein H1 GN=OSJNBa0035F15.9 OS=Oryza sativa subsp. japonica (Rice) PE=2 SV=2	cellulose synthase H1-like protein [Medicago truncatula]
c104425.graph_c0	7.9388	4.37388	0	0.802711	7.89e-05	-3.87326	down	Molecular Function: ATP binding (GO:0005524);; Biological Process: defense response (GO:0006952);; Biological Process: signal transduction (GO:0007165);; Molecular Function: nucleoside-triphosphatase activity (GO:0017111);; Molecular Function: ADP binding (GO:0043531);;	--	--	--	--	--	TIR domain	TMV resistance protein N GN=N OS=Nicotiana glutinosa (Tobacco) PE=1 SV=1	PREDICTED: protein SUPPRESSOR OF npr1-1, CONSTITUTIVE 1-like [Cicer arietinum]
c104508.graph_c0	0	0	8.61179	7.14863	3.48e-08		up	--	--	--	--	--	--	--	--	--
c104527.graph_c0	0	0.0948403	9.69359	11.7371	6.43e-19	7.67074	up	--	[E]	Amino acid transport and metabolism	--	[R]	General function prediction only	GMC oxidoreductase;; GMC oxidoreductase;; FAD dependent oxidoreductase	(R)-mandelonitrile lyase-like (Precursor) GN=At1g73050 OS=Arabidopsis thaliana (Mouse-ear cress) PE=2 SV=1	predicted protein [Hordeum vulgare subsp. vulgare]
c104543.graph_c0	3.99488	4.28426	0	0.159124	4.86e-07	-5.66209	down	--	--	--	--	--	--	--	--	--
c104576.graph_c0	3.51951	4.01234	0.100171	0.408199	2.83e-05	-3.90001	down	--	--	--	--	[R]	General function prediction only	--	--	PREDICTED: uncharacterized protein LOC104750511 [Camelina sativa]
c104627.graph_c0	0	0	9.61133	10.7122	5.98e-11		up	--	--	--	--	--	--	--	--	--
c104643.graph_c1	0.0725101	0.076374	10.0866	7.06895	2.36e-09	6.74118	up	--	--	--	--	--	--	--	--	--
c104665.graph_c0	6.9247	3.34523	0.314897	0.912506	0.00745423	-3.05632	down	Molecular Function: calcium ion binding (GO:0005509);;	[TZDR]	--	K13448|3.87959e-81|cam:101497089|calcium-binding protein CML38-like; K13448 calcium-binding protein CML (A)	[T]	Signal transduction mechanisms	EF-hand domain pair;; EF-hand domain pair;; EF hand;; EF-hand domain;; EF hand	Putative calcium-binding protein CML19 OS=Oryza sativa subsp. japonica (Rice) PE=3 SV=1	PREDICTED: calcium-binding protein CML38-like [Cicer arietinum]
c104666.graph_c0	2.14214	2.95053	0	0.108298	2.62e-07	-5.52623	down	Molecular Function: iron ion binding (GO:0005506);; Molecular Function: electron carrier activity (GO:0009055);; Molecular Function: heme binding (GO:0020037);; Molecular Function: flavonoid 3',5'-hydroxylase activity (GO:0033772);; Biological Process: oxidation-reduction process (GO:0055114);;	[Q]	Secondary metabolites biosynthesis, transport and catabolism	K13083|0|mtr:MTR_144s0009|Flavonoid 3' 5'-hydroxylase; K13083 flavonoid 3',5'-hydroxylase [EC:1.14.13.88] (A)	[Q]	Secondary metabolites biosynthesis, transport and catabolism	Cytochrome P450	Flavonoid 3&apos;,5&apos;-hydroxylase 2 GN=CYP75A3 OS=Petunia hybrida (Petunia) PE=2 SV=1	flavonoid 3&apos; 5&apos; hydroxylase [Pisum sativum]
c104708.graph_c0	5.21875	5.85147	0	0	6.08e-09		down	--	--	--	--	--	--	--	--	--
c104715.graph_c0	26.1158	16.2848	2.90674	2.38391	6.11e-08	-3.07844	down	--	--	--	--	--	--	Protein of unknown function (DUF1685)	--	hypothetical protein MTR_8g086820 [Medicago truncatula]
c104890.graph_c0	1.12583	1.81827	0	0.0822147	0.000266552	-5.13936	down	--	--	--	--	--	--	--	--	--
c104947.graph_c0	17.0161	19.5224	6.26439	5.7581	0.0023793	-1.69681	down	Molecular Function: L-ornithine transmembrane transporter activity (GO:0000064);; Molecular Function: L-histidine transmembrane transporter activity (GO:0005290);; Molecular Function: carnitine:acyl carnitine antiporter activity (GO:0005476);; Cellular Component: mitochondrial inner membrane (GO:0005743);; Biological Process: proline biosynthetic process (GO:0006561);; Biological Process: mitocho…	--	--	K15109|5.03538e-157|mtr:MTR_2g102010|Solute carrier family 25 (Mitochondrial carrier ornithine transporter) member; K15109 solute carrier family 25 (mitochondrial carnitine/acylcarnitine transporter), member 20/29 (A)	[C]	Energy production and conversion	Mitochondrial carrier protein	Mitochondrial arginine transporter BAC2 GN=BAC2 OS=Arabidopsis thaliana (Mouse-ear cress) PE=1 SV=1	carnitine/acylcarnitine carrier-like protein [Medicago truncatula]
c104971.graph_c0	27.9428	28.0682	15.321	9.95059	0.00995775	-1.25825	down	Molecular Function: cytochrome-c oxidase activity (GO:0004129);; Molecular Function: copper ion binding (GO:0005507);; Cellular Component: mitochondrial inner membrane (GO:0005743);; Cellular Component: integral component of membrane (GO:0016021);; Biological Process: electron transport chain (GO:0022900);; Cellular Component: respiratory chain (GO:0070469);;	[C]	Energy production and conversion	K02261|1.13233e-152|mdm:13630207|cox2, C3258_p26; cox2; K02261 cytochrome c oxidase subunit 2 (A)	[C]	Energy production and conversion	Cytochrome C oxidase subunit II, periplasmic domain;; Cytochrome C oxidase subunit II, transmembrane domain	Cytochrome c oxidase subunit 2 GN=COX2 OS=Arabidopsis thaliana (Mouse-ear cress) PE=2 SV=2	cytochrome c oxidase subunit 2 (mitochondrion) [Lotus japonicus]
c105008.graph_c0	214.46	214.499	88.54	47.6818	4.82e-05	-1.77636	down	Molecular Function: glutathione transferase activity (GO:0004364);;	--	--	K00799|1.38727e-55|mtr:MTR_7g065290|hypothetical protein; K00799 glutathione S-transferase [EC:2.5.1.18] (A)	[O]	Posttranslational modification, protein turnover, chaperones	Glutathione S-transferase, C-terminal domain;; Glutathione S-transferase, C-terminal domain	Probable glutathione S-transferase GN=HSP26-A OS=Glycine max (Soybean) PE=2 SV=1	hypothetical protein MTR_7g065290 [Medicago truncatula]
c105029.graph_c0	22.4317	16.2697	1.00173	4.3976	1.28e-10	-2.83126	down	Biological Process: oligopeptide transport (GO:0006857);; Molecular Function: oligopeptide transporter activity (GO:0015198);; Cellular Component: membrane (GO:0016020);; Biological Process: transmembrane transport (GO:0055085);;	--	--	--	[T]	Signal transduction mechanisms	OPT oligopeptide transporter protein;; OPT oligopeptide transporter protein	Oligopeptide transporter 7 GN=OPT7 OS=Arabidopsis thaliana (Mouse-ear cress) PE=2 SV=1	oligopeptide transporter OPT family protein [Medicago truncatula]
c105049.graph_c0	0	0.0431496	2.32904	2.9617	4.37e-08	6.79186	up	--	--	--	--	--	--	--	--	--
c105130.graph_c0	0.0604376	0	2.12009	2.38329	4.07e-07	6.22898	up	--	--	--	--	[R]	General function prediction only	zinc-binding in reverse transcriptase	--	PREDICTED: uncharacterized protein LOC102665746 [Glycine max]
c105159.graph_c0	7.61287	4.93448	0	0.213821	4.21e-08	-5.81528	down	Molecular Function: hydrolase activity, acting on glycosyl bonds (GO:0016798);;	--	--	--	[G]	Carbohydrate transport and metabolism	--	Beta-galactosidase 14 (Precursor) GN=BGAL14 OS=Arabidopsis thaliana (Mouse-ear cress) PE=2 SV=2	Beta-galactosidase 11 [Morus notabilis]
c105183.graph_c0	2.91989	2.88719	0.360404	0.195821	0.000305162	-3.50455	down	Cellular Component: cell wall (GO:0005618);; Cellular Component: cytoplasm (GO:0005737);;	--	--	--	[P]	Inorganic ion transport and metabolism	Heavy-metal-associated domain	--	PREDICTED: uncharacterized protein LOC103996780 isoform X2 [Musa acuminata subsp. malaccensis]
c105200.graph_c0	0	0	2.85039	2.5812	4.37e-08		up	--	--	--	--	[R]	General function prediction only	--	Endonuclease OS=Nicotiana tabacum (Common tobacco) PE=2 SV=1	Copia protein, partial [Glycine soja]
c105200.graph_c1	0.0115388	0.0243074	2.35883	2.19927	3.64e-12	6.87504	up	--	--	--	--	[R]	General function prediction only	Integrase core domain;; Reverse transcriptase (RNA-dependent DNA polymerase);; gag-polypeptide of LTR copia-type	Endonuclease OS=Nicotiana tabacum (Common tobacco) PE=2 SV=1	Retrovirus-related Pol polyprotein from transposon TNT 1-94, partial [Glycine soja]
c105217.graph_c0	114.88	120.863	40.1572	38.3317	0.00013071	-1.67382	down	Molecular Function: ATP binding (GO:0005524);; Cellular Component: mitochondrion (GO:0005739);; Biological Process: protein folding (GO:0006457);; Biological Process: response to stress (GO:0006950);;	[O]	Posttranslational modification, protein turnover, chaperones	K04078|8.03479e-60|cam:101492783|10 kDa chaperonin-like; K04078 chaperonin GroES (A)	[O]	Posttranslational modification, protein turnover, chaperones	Chaperonin 10 Kd subunit	10 kDa chaperonin OS=Brassica napus (Rape) PE=3 SV=1	PREDICTED: 10 kDa chaperonin-like [Cicer arietinum]
c105244.graph_c0	23.9519	27.9539	2.25667	2.70276	2.01e-09	-3.4644	down	--	--	--	--	--	--	--	--	hypothetical protein MTR_1g106215 [Medicago truncatula]
c105278.graph_c1	0	0	3.5277	3.5353	6.23e-10		up	--	--	--	--	--	--	--	--	--
c105329.graph_c0	5.83348	3.56523	28.6607	17.0397	0.000819189	2.18612	up	--	--	--	--	--	--	BURP domain	Polygalacturonase non-catalytic subunit AroGP2 (Precursor) GN=GP2 OS=Solanum lycopersicum (Tomato) PE=3 SV=1	Polygalacturonase-1 non-catalytic subunit beta [Medicago truncatula]
c105334.graph_c0	0	0	2.34609	1.92535	4.39e-08		up	--	--	--	--	--	--	--	--	--
c105369.graph_c0	0	0	2.26363	2.90396	1.24e-09		up	Molecular Function: ATP binding (GO:0005524);; Biological Process: ATP catabolic process (GO:0006200);; Cellular Component: membrane (GO:0016020);; Molecular Function: ATPase activity (GO:0016887);;	[V]	Defense mechanisms	--	[Q]	Secondary metabolites biosynthesis, transport and catabolism	--	ABC transporter G family member 19 GN=T26I12.10 OS=Arabidopsis thaliana (Mouse-ear cress) PE=1 SV=1	ABC transporter G family member [Medicago truncatula]
c105383.graph_c0	0.0822169	0	0.994511	1.26083	6.42e-06	4.795	up	Molecular Function: monooxygenase activity (GO:0004497);; Molecular Function: iron ion binding (GO:0005506);; Molecular Function: electron carrier activity (GO:0009055);; Molecular Function: oxidoreductase activity, acting on paired donors, with incorporation or reduction of molecular oxygen (GO:0016705);; Molecular Function: heme binding (GO:0020037);; Biological Process: oxidation-reduction pro…	[Q]	Secondary metabolites biosynthesis, transport and catabolism	--	[Q]	Secondary metabolites biosynthesis, transport and catabolism	Cytochrome P450	Cytochrome P450 71D10 GN=CYP71D10 OS=Glycine max (Soybean) PE=2 SV=1	Cytochrome P450 [Medicago truncatula]
c105400.graph_c0	0.609336	0.745324	0	0.0215309	7.38e-07	-5.94154	down	--	--	--	--	[R]	General function prediction only	zinc-binding in reverse transcriptase;; Reverse transcriptase (RNA-dependent DNA polymerase);; Reverse transcriptase (RNA-dependent DNA polymerase)	Putative ribonuclease H protein At1g65750 GN=At1g65750 OS=Arabidopsis thaliana (Mouse-ear cress) PE=3 SV=1	hypothetical protein [Beta vulgaris subsp. vulgaris]
c105424.graph_c0	61.1659	16.8238	0	0.154378	0.00228934	-8.89145	down	--	--	--	--	--	--	--	--	--
c105429.graph_c0	19.2515	11.7563	3.55845	2.08508	1.78e-05	-2.55438	down	--	--	--	--	--	--	Late embryogenesis abundant protein	--	late embryogenesis abundant protein [Medicago truncatula]
c105513.graph_c0	16.3104	17.1795	1.91961	1.15888	4.74e-06	-3.56	down	Molecular Function: ATP binding (GO:0005524);; Biological Process: response to stress (GO:0006950);;	[O]	Posttranslational modification, protein turnover, chaperones	K03283|1.47881e-98|sly:101055596|hsc70.3; heat shock protein 70 isoform 3; K03283 heat shock 70kDa protein 1/8 (A)	[O]	Posttranslational modification, protein turnover, chaperones	Hsp70 protein;; NAD-specific glutamate dehydrogenase	Heat shock cognate 70 kDa protein 2 GN=HSC-2 OS=Solanum lycopersicum (Tomato) PE=1 SV=1	hypothetical protein, partial [Scutellaria baicalensis]
c105560.graph_c0	3.03251	2.30273	0	0.154501	2.72e-06	-5.05664	down	--	--	--	--	--	--	Transposase-associated domain	--	PREDICTED: uncharacterized protein LOC101504131 [Cicer arietinum]
c105628.graph_c0	8.95723	3.97654	0.179088	0.567614	0.0037379	-4.09884	down	--	--	--	--	--	--	--	--	PREDICTED: protein IDA-like [Glycine max]
c105706.graph_c0	235.738	307.815	86.9816	60.372	0.000357971	-1.99959	down	--	--	--	--	--	--	C2 domain	--	unknown [Medicago truncatula]
c105708.graph_c0	0.108799	0.0572983	44.4826	25.2059	1.61e-19	8.61993	up	--	--	--	--	--	--	--	--	transmembrane protein, putative [Medicago truncatula]
c105730.graph_c0	0	0	1.4665	1.78992	5.68e-08		up	--	--	--	--	--	--	--	--	--
c105775.graph_c0	0	0	6.21939	2.90495	4.06e-07		up	--	--	--	--	--	--	GDSL-like Lipase/Acylhydrolase	Esterase (Precursor) OS=Hevea brasiliensis (Para rubber tree) PE=1 SV=1	Enod8.3, partial [Medicago truncatula]
c105786.graph_c0	0	0	5.42706	4.91454	9.73e-11		up	--	[L]	Replication, recombination and repair	--	[R]	General function prediction only	--	--	hypothetical protein VITISV_026680 [Vitis vinifera]
c105789.graph_c0	0	0.186888	12.4484	5.53919	1.53e-05	6.3765	up	--	--	--	--	--	--	--	--	--
c105793.graph_c0	13.2749	9.55752	2.43913	1.28846	0.0043652	-2.72405	down	--	--	--	--	--	--	--	--	--
c105796.graph_c0	1.97013	0.488262	104.016	51.7931	1.83e-08	5.90984	up	--	--	--	--	--	--	--	--	--
c105809.graph_c0	0.239029	0	2.09622	1.63643	5.73e-05	3.9509	up	--	--	--	--	--	--	--	--	--
c105918.graph_c0	34.4134	37.9753	2.44438	2.62995	6.09e-19	-3.91583	down	--	[G]	Carbohydrate transport and metabolism	K01193|0|mtr:MTR_4g101630|Acid beta-fructofuranosidase; K01193 beta-fructofuranosidase [EC:3.2.1.26] (A)	[G]	Carbohydrate transport and metabolism	Glycosyl hydrolases family 32 N-terminal domain;; Glycosyl hydrolases family 32 C terminal;; Domain of unknown function (DUF3357)	Acid beta-fructofuranosidase (Precursor) GN=VCINV OS=Vicia faba (Broad bean) PE=2 SV=1	RecName: Full=Acid beta-fructofuranosidase; AltName: Full=Acid invertase; Short=AI; AltName: Full=Acid sucrose hydrolase; AltName: Full=Vacuolar invertase; Flags: Precursor [Vicia faba]
c105926.graph_c0	264.717	208.193	16.7751	25.1096	7.52e-17	-3.54379	down	--	--	--	--	--	--	--	--	hypothetical protein L484_003043 [Morus notabilis]
c105966.graph_c0	223.288	152.247	40.8967	7.88475	1.26e-10	-3.10155	down	--	--	--	--	--	--	Late embryogenesis abundant protein	Indole-3-acetic acid-induced protein ARG2 GN=ARG2 OS=Vigna radiata var. radiata (Mung bean) PE=2 SV=1	PREDICTED: indole-3-acetic acid-induced protein ARG2-like [Cicer arietinum]
c106007.graph_c0	0	0.066596	2.37089	3.18585	6.2e-07	6.24001	up	--	--	--	--	--	--	--	--	--
c106012.graph_c0	0	0	4.27338	2.35128	2.82e-09		up	--	--	--	--	--	--	--	--	hypothetical protein PHAVU_006G158600g [Phaseolus vulgaris]
c106091.graph_c0	64.2636	66.6284	36.7914	21.1309	0.00855252	-1.2952	down	--	--	--	--	--	--	--	--	hypothetical protein MTR_4g071120 [Medicago truncatula]
c106124.graph_c0	8.9742	5.12843	2.54062	0.522883	0.00550992	-2.35031	down	--	--	--	--	--	--	--	--	--
c106240.graph_c0	22.3107	15.2169	252.546	250.664	1.77e-17	3.6781	up	--	--	--	--	--	--	Protease inhibitor/seed storage/LTP family;; Probable lipid transfer	Non-specific lipid-transfer protein (Precursor) OS=Helianthus annuus (Common sunflower) PE=3 SV=1	Non-specific lipid-transfer protein [Medicago truncatula]
c106266.graph_c0	2.55956	1.28057	16.7963	11.9157	0.000148097	2.82562	up	--	--	--	--	--	--	--	--	--
c106280.graph_c1	2.29883	2.81187	0	0	6.95e-08		down	Cellular Component: ribonucleoprotein complex (GO:0030529);;	--	--	--	[R]	General function prediction only	--	--	hypothetical protein glysoja_038971, partial [Glycine soja]
c106396.graph_c0	0	0	1.2291	2.03602	2.8e-05		up	--	--	--	K02365|2.84265e-81|cam:101501526|uncharacterized LOC101501526; K02365 separase [EC:3.4.22.49] (A)	[D]	Cell cycle control, cell division, chromosome partitioning	Peptidase family C50	Separase GN=F7H19.150 OS=Arabidopsis thaliana (Mouse-ear cress) PE=2 SV=1	separase-like protein [Medicago truncatula]
c106478.graph_c0	2.55708	1.3703	0	0	5.12e-07		down	--	--	--	--	--	--	Retrotransposon gag protein	--	--
c106493.graph_c0	117.133	122.819	61.8281	42.94	0.00593852	-1.3031	down	Molecular Function: protein tyrosine phosphatase activity (GO:0004725);; Cellular Component: mitochondrion (GO:0005739);; Biological Process: protein phosphorylation (GO:0006468);; Cellular Component: chloroplast (GO:0009507);; Molecular Function: arsenate reductase activity (GO:0030611);; Biological Process: peptidyl-tyrosine dephosphorylation (GO:0035335);; Biological Process: response to arsen…	[P]	Inorganic ion transport and metabolism	K18065|8.03463e-79|mtr:MTR_7g102310|Dual specificity phosphatase Cdc25; K18065 Cdc25 family phosphatase [EC:3.1.3.48 1.20.4.-] (A)	[D]	Cell cycle control, cell division, chromosome partitioning	Rhodanese-like domain	Dual specificity phosphatase Cdc25 GN=F12E4_220 OS=Arabidopsis thaliana (Mouse-ear cress) PE=1 SV=1	unknown [Medicago truncatula]
c106509.graph_c0	5.66497	4.91021	0	0.711026	3.11e-05	-3.84678	down	--	--	--	--	--	--	--	--	--
c106531.graph_c0	0	0.72518	9.16094	4.1479	0.00206307	3.98672	up	--	--	--	--	--	--	--	--	--
c106552.graph_c0	150.095	112.817	19.926	12.5458	3.46e-13	-3.11752	down	Biological Process: anion transport (GO:0006820);; Cellular Component: cell part (GO:0044464);; Biological Process: intracellular transport (GO:0046907);; Biological Process: regulation of biological process (GO:0050789);; Biological Process: response to stimulus (GO:0050896);; Biological Process: organic substance transport (GO:0071702);; Biological Process: nitrogen compound transport (GO:00717…	--	--	--	--	--	C2 domain	--	C2 domain protein [Medicago truncatula]
c106621.graph_c0	2.90559	1.76206	0	0.0482233	1.2e-07	-6.53466	down	--	--	--	--	[R]	General function prediction only	--	Putative ribonuclease H protein At1g65750 GN=At1g65750 OS=Arabidopsis thaliana (Mouse-ear cress) PE=3 SV=1	PREDICTED: uncharacterized protein LOC104217097 [Nicotiana sylvestris]
c106643.graph_c0	0.531947	1.12059	16.4081	17.4078	9.72e-09	4.24789	up	Cellular Component: chloroplast thylakoid membrane (GO:0009535);; Cellular Component: apoplast (GO:0048046);;	--	--	--	--	--	Hydrophobic seed protein;; Protease inhibitor/seed storage/LTP family;; Probable lipid transfer	pEARLI1-like lipid transfer protein 1 (Precursor) GN=AZI1 OS=Arabidopsis thaliana (Mouse-ear cress) PE=1 SV=1	hypothetical protein L484_011178 [Morus notabilis]
c106648.graph_c0	2.20149	1.48008	0.169976	0.359155	0.00268394	-2.819	down	--	--	--	--	--	--	--	--	--
c106738.graph_c0	25.9374	13.1323	51.9285	52.3965	0.0048585	1.36249	up	Biological Process: embryo development ending in seed dormancy (GO:0009793);;	--	--	--	--	--	--	--	PREDICTED: uncharacterized protein LOC101506585 [Cicer arietinum]
c106757.graph_c0	5.2587	4.0467	0.726144	1.65707	0.00951646	-1.98681	down	Cellular Component: membrane (GO:0016020);; Molecular Function: transferase activity, transferring glycosyl groups (GO:0016757);;	--	--	--	[GMW]	--	Exostosin family	Probable glycosyltransferase At5g03795 GN=At5g03795 OS=Arabidopsis thaliana (Mouse-ear cress) PE=3 SV=2	PREDICTED: probable glycosyltransferase At5g03795-like [Cicer arietinum]
c106761.graph_c0	0	0.0386315	14.8624	9.32072	2.64e-19	9.09847	up	--	--	--	--	--	--	--	--	--
c106769.graph_c0	0	0	6.23363	2.19525	0.00069664		up	Molecular Function: metal ion binding (GO:0046872);;	--	--	--	[R]	General function prediction only	Reverse transcriptase (RNA-dependent DNA polymerase)	Uncharacterized mitochondrial protein AtMg00810 GN=AtMg00810 OS=Arabidopsis thaliana (Mouse-ear cress) PE=4 SV=1	putative retrotransposon polyprotein [Arabidopsis thaliana]
c106856.graph_c0	16.0886	8.14111	0.203249	0.322095	1.34e-06	-5.55338	down	--	--	--	--	--	--	--	--	--
c106885.graph_c0	3.67988	1.08799	13.549	11.0673	0.000153101	2.3181	up	--	--	--	K10712|4.42582e-166|cam:101511281|2-aminoethanethiol dioxygenase-like; K10712 cysteamine dioxygenase [EC:1.13.11.19] (A)	[S]	Function unknown	Protein of unknown function (DUF1637)	--	2-aminoethanethiol dioxygenase-like protein [Medicago truncatula]
c107006.graph_c0	121.07	151.116	23.3255	33.5181	5.79e-06	-2.32753	down	--	--	--	--	[O]	Posttranslational modification, protein turnover, chaperones	Hsp20/alpha crystallin family	18.1 kDa class I heat shock protein (Fragment) GN=HSP18.1 OS=Medicago sativa (Alfalfa) PE=2 SV=1	17.5 kDa class I heat shock protein [Medicago truncatula]
c107020.graph_c0	14.6773	15.6216	0.806998	4.72201	0.000114239	-2.44984	down	Molecular Function: metal ion binding (GO:0046872);;	--	--	--	[O]	Posttranslational modification, protein turnover, chaperones	Ring finger domain;; Zinc finger, C3HC4 type (RING finger);; zinc-RING finger domain;; Zinc finger, C3HC4 type (RING finger);; zinc finger of C3HC4-type, RING;; Zinc finger, C3HC4 type (RING finger)	--	C3HC4-type RING zinc finger protein [Medicago truncatula]
c107232.graph_c0	7.80252	7.07853	1.24004	0.0623851	2.44e-05	-3.7145	down	Biological Process: response to stress (GO:0006950);; Biological Process: response to abiotic stimulus (GO:0009628);;	--	--	--	--	--	--	--	PREDICTED: uncharacterized protein LOC101500555 [Cicer arietinum]
c107236.graph_c0	54.7812	42.4392	154.815	117.221	0.00236583	1.39478	up	Molecular Function: peroxidase activity (GO:0004601);; Biological Process: rRNA processing (GO:0006364);; Cellular Component: chloroplast stromal thylakoid (GO:0009533);; Cellular Component: chloroplast thylakoid membrane (GO:0009535);; Cellular Component: chloroplast envelope (GO:0009941);; Cellular Component: plastoglobule (GO:0010287);; Biological Process: chlorophyll biosynthetic process (GO:…	[O]	Posttranslational modification, protein turnover, chaperones	K03564|1.54542e-109|mtr:MTR_4g124790|Peroxiredoxin Q; K03564 peroxiredoxin Q/BCP [EC:1.11.1.15] (A)	[O]	Posttranslational modification, protein turnover, chaperones	AhpC/TSA family;; Redoxin	Peroxiredoxin Q, chloroplastic (Precursor) GN=PRXQ OS=Populus jackii (Balm of Gilead) PE=1 SV=1	Peroxiredoxin Q [Medicago truncatula]
c107246.graph_c0	0	0.0956418	9.22632	8.55393	2.76e-09	7.37198	up	Biological Process: defense response (GO:0006952);; Biological Process: response to biotic stimulus (GO:0009607);;	--	--	--	--	--	Pathogenesis-related protein Bet v I family	MLP-like protein 34 GN=MLP34 OS=Arabidopsis thaliana (Mouse-ear cress) PE=2 SV=1	pathogenesis-related protein 10a [Lens culinaris]
c107304.graph_c0	0	0	10.7149	10.2421	2.65e-14		up	--	--	--	--	--	--	--	--	--
c107306.graph_c0	0.235255	0.318589	6.05726	3.71817	3.42e-06	4.01595	up	Molecular Function: oxidoreductase activity (GO:0016491);; Molecular Function: flavin adenine dinucleotide binding (GO:0050660);; Biological Process: oxidation-reduction process (GO:0055114);;	[C]	Energy production and conversion	--	[C]	Energy production and conversion	Pyridine nucleotide-disulphide oxidoreductase;; Pyridine nucleotide-disulphide oxidoreductase;; FAD-NAD(P)-binding;; FAD dependent oxidoreductase;; Putative NAD(P)-binding;; Lycopene cyclase protein;; L-lysine 6-monooxygenase (NADPH-requiring);; HI0933-like protein;; NAD(P)-binding Rossmann-like domain;; FAD binding domain	Alternative NAD(P)H-ubiquinone oxidoreductase C1, chloroplastic/mitochondrial (Precursor) GN=NDC1 OS=Arabidopsis thaliana (Mouse-ear cress) PE=1 SV=2	PREDICTED: apoptosis-inducing factor homolog A-like [Cicer arietinum]
c107329.graph_c0	0	0.0786569	2.8906	3.10842	3.3e-07	6.09618	up	Molecular Function: ATP binding (GO:0005524);; Biological Process: ATP catabolic process (GO:0006200);; Cellular Component: membrane (GO:0016020);; Molecular Function: ATPase activity (GO:0016887);;	--	--	--	--	--	--	--	ABC transporter G family member [Medicago truncatula]
c107371.graph_c0	72.4884	57.5742	24.9626	10.7077	3.16e-06	-1.99182	down	--	--	--	--	--	--	Protein of unknown function (DUF793);; Protein of unknown function (DUF677)	UPF0496 protein 4 OS=Oryza sativa subsp. japonica (Rice) PE=2 SV=1	hypothetical protein MTR_1g098700 [Medicago truncatula]
c107383.graph_c0	95.2425	77.7788	16.3085	34.6176	3.11e-05	-1.79243	down	Molecular Function: structural constituent of ribosome (GO:0003735);; Cellular Component: nucleolus (GO:0005730);; Cellular Component: mitochondrion (GO:0005739);; Biological Process: translation (GO:0006412);; Cellular Component: cytosolic small ribosomal subunit (GO:0022627);;	--	--	K02983|3.80278e-26|mtr:MTR_5g012610|40S ribosomal protein S30; K02983 small subunit ribosomal protein S30e (A)	[JO]	--	Ribosomal protein S30	40S ribosomal protein S30 GN=RPS30C OS=Arabidopsis thaliana (Mouse-ear cress) PE=3 SV=3	PREDICTED: 40S ribosomal protein S30 [Beta vulgaris subsp. vulgaris]
c107393.graph_c0	61.5296	86.1871	15.5729	10.8943	0.000308699	-2.59929	down	--	--	--	--	--	--	Transferase family	Phenolic glucoside malonyltransferase 1 GN=PMAT1 OS=Arabidopsis thaliana (Mouse-ear cress) PE=1 SV=1	malonyl-CoA:isoflavone 7-O-glucoside malonyltransferase [Medicago truncatula]
c107404.graph_c0	5.74634	3.61201	0.186852	0.642982	2.01e-05	-3.48916	down	Biological Process: lipid metabolic process (GO:0006629);; Molecular Function: hydrolase activity, acting on ester bonds (GO:0016788);;	--	--	--	--	--	GDSL-like Lipase/Acylhydrolase	GDSL esterase/lipase At1g74460 (Precursor) GN=At1g74460 OS=Arabidopsis thaliana (Mouse-ear cress) PE=2 SV=1	GDSL-like lipase/acylhydrolase [Medicago truncatula]
c107450.graph_c0	12.0474	7.3919	1616.73	1823.95	2.73e-34	7.41298	up	--	--	--	--	--	--	--	--	--
c107454.graph_c0	0.335655	1.01012	9.62834	5.67263	3.66e-05	3.35078	up	--	--	--	--	--	--	--	--	phage capsid scaffolding protein (GPO) serine peptidase [Medicago truncatula]
c107529.graph_c0	135.984	92.0715	14.6232	31.6559	6.86e-07	-2.32029	down	--	--	--	--	--	--	--	--	hypothetical protein MTR_4g113600 [Medicago truncatula]
c107569.graph_c0	3.3641	3.96757	12.3511	10.4062	0.00681439	1.53422	up	Molecular Function: protein serine/threonine kinase activity (GO:0004674);; Molecular Function: ATP binding (GO:0005524);; Biological Process: protein phosphorylation (GO:0006468);;	[RTKL]	--	--	[T]	Signal transduction mechanisms	Protein tyrosine kinase;; Protein kinase domain;; Kinase-like	Serine/threonine-protein kinase HT1 GN=HT1 OS=Arabidopsis thaliana (Mouse-ear cress) PE=1 SV=1	Fibroblast growth factor receptor [Medicago truncatula]
c107663.graph_c0	0.108695	0.114487	2.62958	4.52437	0.0047591	4.95218	up	--	--	--	--	--	--	--	--	--
c107681.graph_c0	4.02384	5.1415	0.638337	0.505796	0.00110957	-3.10902	down	Molecular Function: metal ion binding (GO:0046872);;	--	--	--	[R]	General function prediction only	--	Endonuclease OS=Nicotiana tabacum (Common tobacco) PE=2 SV=1	F5J5.14 [Arabidopsis thaliana]
c107689.graph_c0	1.59952	0.874778	5.87886	5.62691	0.00797633	2.15648	up	Molecular Function: transporter activity (GO:0005215);; Cellular Component: intracellular (GO:0005622);; Biological Process: transport (GO:0006810);; Cellular Component: integral component of membrane (GO:0016021);;	--	--	--	[I]	Lipid transport and metabolism	CRAL/TRIO domain;; CRAL/TRIO, N-terminal domain	Patellin-5 GN=PATL5 OS=Arabidopsis thaliana (Mouse-ear cress) PE=1 SV=2	Patellin-5 [Medicago truncatula]
c107693.graph_c0	0.0894388	0.188409	1.51462	1.17564	0.000529569	3.14807	up	Cellular Component: plasma membrane (GO:0005886);; Biological Process: carbohydrate transport (GO:0008643);; Cellular Component: integral component of membrane (GO:0016021);;	--	--	K15382|7.18971e-129|cam:101509872|bidirectional sugar transporter SWEET17-like; K15382 solute carrier family 50 (sugar transporter) (A)	[R]	General function prediction only	Sugar efflux transporter for intercellular exchange	Bidirectional sugar transporter SWEET17 OS=Arabidopsis thaliana (Mouse-ear cress) PE=2 SV=2	bidirectional sugar transporter [Medicago truncatula]
c107704.graph_c1	0	0	17.4427	6.08782	0.000685466		up	Biological Process: defense response (GO:0006952);; Biological Process: response to biotic stimulus (GO:0009607);;	--	--	--	--	--	--	--	MLP-like protein [Medicago truncatula]
c107716.graph_c0	7.78493	7.01765	4.202	0.68298	0.0028337	-1.77376	down	--	--	--	--	--	--	Domain of unknown function (DUF4220);; Protein of unknown function, DUF594	--	PREDICTED: uncharacterized protein LOC101495324 [Cicer arietinum]
c107738.graph_c0	0.126186	0.13291	2.59483	1.19793	0.00170747	3.73896	up	Molecular Function: sequence-specific DNA binding transcription factor activity (GO:0003700);; Cellular Component: nucleus (GO:0005634);; Biological Process: regulation of transcription, DNA-templated (GO:0006355);; Biological Process: cell proliferation (GO:0008283);; Biological Process: flower development (GO:0009908);; Biological Process: adaxial/abaxial axis specification (GO:0009943);; Biolo…	--	--	--	--	--	Homeobox domain	WUSCHEL-related homeobox 3 GN=T8O18.10 OS=Arabidopsis thaliana (Mouse-ear cress) PE=2 SV=1	WUSCHEL-related homeobox 3B [Medicago truncatula]
c107742.graph_c0	0	0	2.76339	1.49183	1.93e-08		up	--	--	--	K02183|4.94035e-18|ota:Ot01g03840|calmodulin mutant SYNCAM9 (ISS); K02183 calmodulin (A)	[Z]	Cytoskeleton	EF-hand domain pair;; EF-hand domain	Calmodulin OS=Pythium splendens (Leaf rot fungus) PE=2 SV=1	calmodulin mutant SYNCAM9 (ISS) [Ostreococcus tauri]
c107812.graph_c0	5.20932	2.93486	0.390778	0.751981	0.00136658	-2.85194	down	--	--	--	--	--	--	Arabidopsis protein of unknown function	--	hypothetical protein MTR_8g074530 [Medicago truncatula]
c107830.graph_c0	2.02097	1.43998	0	0.19533	2.67e-05	-4.09139	down	--	--	--	--	--	--	--	--	--
c107931.graph_c0	1.21973	0.698222	0.192445	0.11618	0.00382736	-2.72771	down	Molecular Function: nucleotide binding (GO:0000166);; Molecular Function: protein kinase activity (GO:0004672);; Biological Process: phosphorylation (GO:0016310);;	[RTKL]	--	--	[R]	General function prediction only	Protein kinase domain;; Protein tyrosine kinase	Serine/threonine-protein kinase OXI1 GN=At3g25250 OS=Arabidopsis thaliana (Mouse-ear cress) PE=1 SV=1	PREDICTED: serine/threonine-protein kinase OXI1-like [Cicer arietinum]
c107968.graph_c0	2.56167	1.79878	40.9278	20.1877	7.04e-05	3.69662	up	--	--	--	--	--	--	--	--	hypothetical protein MTR_7g445370 [Medicago truncatula]
c108077.graph_c0	4.84156	2.52113	0	0	1.77e-07		down	--	--	--	--	--	--	--	--	--
c108089.graph_c0	1.19309	1.52323	0	0	5.77e-08		down	--	--	--	--	[R]	General function prediction only	zinc-binding in reverse transcriptase	Putative ribonuclease H protein At1g65750 GN=At1g65750 OS=Arabidopsis thaliana (Mouse-ear cress) PE=3 SV=1	PREDICTED: uncharacterized protein LOC102661523 [Glycine max]
c108152.graph_c0	0	0.243623	1.0725	1.43571	0.00106534	3.22105	up	Molecular Function: hydrolase activity, acting on ester bonds (GO:0016788);;	--	--	--	--	--	--	--	GDSL esterase/lipase [Medicago truncatula]
c108156.graph_c0	2.15391	2.15525	0	0	4.57e-08		down	--	--	--	--	--	--	--	--	--
c108180.graph_c0	0.281662	0	8.23367	3.80518	2.62e-05	5.37113	up	Molecular Function: monooxygenase activity (GO:0004497);; Molecular Function: enzyme inhibitor activity (GO:0004857);; Molecular Function: iron ion binding (GO:0005506);; Molecular Function: electron carrier activity (GO:0009055);; Molecular Function: oxidoreductase activity, acting on paired donors, with incorporation or reduction of molecular oxygen (GO:0016705);; Molecular Function: heme bindi…	--	--	--	--	--	Plant invertase/pectin methylesterase inhibitor	21 kDa protein (Precursor) OS=Daucus carota (Wild carrot) PE=2 SV=1	Pectinesterase [Medicago truncatula]
c108214.graph_c0	0.315936	0.499158	2.67514	2.68206	0.00494523	2.61629	up	Molecular Function: protein serine/threonine kinase activity (GO:0004674);; Molecular Function: ATP binding (GO:0005524);; Biological Process: protein phosphorylation (GO:0006468);;	--	--	--	--	--	Leucine Rich repeats (2 copies);; Leucine rich repeat;; Leucine Rich Repeat;; Leucine Rich repeat;; Leucine rich repeat	Probable LRR receptor-like serine/threonine-protein kinase At1g53420 (Precursor) GN=At1g53420 OS=Arabidopsis thaliana (Mouse-ear cress) PE=2 SV=2	Cysteine-rich receptor-like protein kinase [Medicago truncatula]
c108234.graph_c0	130.231	204.767	1.58891	3.90548	1.54e-07	-5.97656	down	Cellular Component: integral component of membrane (GO:0016021);; Cellular Component: chloroplast membrane (GO:0031969);;	--	--	--	--	--	--	Early light-induced protein, chloroplastic (Precursor) OS=Pisum sativum (Garden pea) PE=2 SV=1	RecName: Full=Early light-induced protein, chloroplastic; Short=ELIP; Flags: Precursor [Pisum sativum]
c108324.graph_c0	7.56882	4.97486	1.20652	1.79955	0.00428573	-2.10075	down	Biological Process: MAPK cascade (GO:0000165);; Biological Process: response to hypoxia (GO:0001666);; Biological Process: regulation of transcription, DNA-templated (GO:0006355);; Biological Process: protein targeting to membrane (GO:0006612);; Biological Process: salicylic acid biosynthetic process (GO:0009697);; Biological Process: systemic acquired resistance, salicylic acid mediated signalin…	--	--	--	--	--	Plant protein of unknown function (DUF868)	--	PREDICTED: uncharacterized protein LOC101498919 [Cicer arietinum]
c108389.graph_c0	2.01795	1.55103	0	0	6.61e-08		down	--	--	--	--	--	--	--	--	--
c108453.graph_c0	0	0	30.3762	8.11968	0.0050957		up	--	--	--	--	--	--	--	--	--
c108505.graph_c0	2.43948	3.10276	0.111352	0.352928	0.000176574	-3.60332	down	Molecular Function: nucleotide binding (GO:0000166);; Molecular Function: protein kinase activity (GO:0004672);; Cellular Component: membrane (GO:0016020);; Biological Process: phosphorylation (GO:0016310);; Biological Process: protein metabolic process (GO:0019538);; Biological Process: cellular macromolecule metabolic process (GO:0044260);;	--	--	--	--	--	--	--	RNA-directed DNA polymerase (Reverse transcriptase) [Medicago truncatula]
c108583.graph_c0	52.5451	56.7549	2.33851	3.04075	1.31e-20	-4.41314	down	Molecular Function: secondary active sulfate transmembrane transporter activity (GO:0008271);; Biological Process: sulfate transport (GO:0008272);; Cellular Component: integral component of membrane (GO:0016021);; Biological Process: transmembrane transport (GO:0055085);;	[P]	Inorganic ion transport and metabolism	K17471|0|cam:101512274|probable sulfate transporter 3.5-like; K17471 sulfate transporter 3 (A)	[P]	Inorganic ion transport and metabolism	Sulfate transporter family;; Sulfate transporter N-terminal domain with GLY motif	Probable sulfate transporter 3.5 GN=SULTR3;5 OS=Arabidopsis thaliana (Mouse-ear cress) PE=2 SV=1	SST1-like protein [Pisum sativum]
c108587.graph_c0	15.0276	11.4422	0.949034	3.90039	0.000617126	-2.44264	down	--	--	--	--	--	--	--	--	--
c108673.graph_c0	33.4623	39.6411	0	0	1.11e-28		down	--	--	--	--	--	--	--	--	--
c108701.graph_c1	2.39389	1.41832	16.2883	10.407	0.000699451	2.71803	up	--	--	--	--	--	--	--	--	--
c108708.graph_c0	3.64923	2.64787	0	0	4.53e-08		down	Molecular Function: ATP binding (GO:0005524);; Biological Process: defense response (GO:0006952);; Biological Process: signal transduction (GO:0007165);; Molecular Function: nucleoside-triphosphatase activity (GO:0017111);; Molecular Function: ADP binding (GO:0043531);;	--	--	--	--	--	NB-ARC domain	TMV resistance protein N GN=N OS=Nicotiana glutinosa (Tobacco) PE=1 SV=1	disease resistance protein (TIR-NBS-LRR class), putative [Medicago truncatula]
c108708.graph_c1	5.22868	2.68119	0	0.0753607	4.13e-06	-6.64513	down	--	--	--	--	--	--	--	--	--
c108723.graph_c0	7.10337	3.31805	0	0	3.81e-06		down	--	--	--	--	--	--	--	--	--
c108732.graph_c0	1.88622	2.16735	0.259274	0.42262	0.00673489	-2.62859	down	--	--	--	--	--	--	--	--	PREDICTED: uncharacterized protein LOC101513060 [Cicer arietinum]
c108803.graph_c0	95.687	51.6213	4.54747	4.80936	5.16e-06	-4.03048	down	--	--	--	--	[L]	Replication, recombination and repair	DDE superfamily endonuclease	--	PREDICTED: putative nuclease HARBI1-like [Cicer arietinum]
c108836.graph_c0	0	0	40.0337	19.1152	6.74e-10		up	--	--	--	--	--	--	--	--	--
c108854.graph_c0	0.0775407	0	7.40978	5.94558	7.8e-09	7.41598	up	Molecular Function: transferase activity, transferring hexosyl groups (GO:0016758);;	--	--	--	[GC]	--	--	Anthocyanidin 3-O-glucosyltransferase GN=RT OS=Petunia hybrida (Petunia) PE=2 SV=1	UDP rhamnose anthocyanidin-3-glucoside rhamnosyltransferase [Medicago truncatula]
c108891.graph_c0	4.86599	3.02476	37.3423	22.6312	3.24e-06	2.83106	up	--	--	--	--	--	--	Potato type II proteinase inhibitor family	Proteinase inhibitor PSI-1.2 OS=Capsicum annuum (Bell pepper) PE=1 SV=1	unknown [Medicago truncatula]
c108923.graph_c0	0.0484982	0	3.34387	3.82494	2.04e-08	7.21834	up	--	--	--	--	[O]	Posttranslational modification, protein turnover, chaperones	Ring finger domain;; RING-H2 zinc finger;; Zinc finger, C3HC4 type (RING finger)	NEP1-interacting protein 1 GN=F4B14.110 OS=Arabidopsis thaliana (Mouse-ear cress) PE=1 SV=2	NEP1-interacting protein 2 [Glycine soja]
c108955.graph_c0	3.76126	3.80322	0.0909937	0.906404	0.00216087	-2.9033	down	--	--	--	--	[E]	Amino acid transport and metabolism	Transmembrane amino acid transporter protein;; Tryptophan/tyrosine permease family	Amino acid permease 2 GN=AAP2 OS=Arabidopsis thaliana (Mouse-ear cress) PE=1 SV=1	amino acid permease AAP1 [Vicia faba var. minor]
c108980.graph_c0	0.0456814	0	8.39907	4.20325	6.22e-09	8.06608	up	--	--	--	--	--	--	--	--	--
c109058.graph_c0	0.0178396	0	1.4458	1.28972	1.66e-08	7.25519	up	--	--	--	--	--	--	--	--	--
c109074.graph_c0	0	0	3.19902	2.77095	1.55e-08		up	Molecular Function: nucleic acid binding (GO:0003676);; Molecular Function: hydrolase activity (GO:0016787);; Biological Process: primary metabolic process (GO:0044238);; Biological Process: organic substance metabolic process (GO:0071704);;	--	--	K03231|1.11158e-41|mtr:MTR_1g095710|Elongation factor 1-alpha; K03231 elongation factor 1-alpha (A)	[L]	Replication, recombination and repair	hAT family C-terminal dimerisation region;; Domain of unknown function (DUF4413)	Putative AC transposase OS=Zea mays (Maize) PE=2 SV=2	Elongation factor 1-alpha [Medicago truncatula]
c109078.graph_c0	0	0	1.83896	2.49794	1.77e-06		up	--	--	--	--	--	--	--	--	--
c109108.graph_c0	0.0543995	0	20.2014	6.25678	0.000916343	8.85795	up	--	--	--	--	--	--	--	--	--
c109132.graph_c0	15.1526	18.6201	50.8571	38.7798	0.00741865	1.30023	up	Cellular Component: cytoplasmic membrane-bounded vesicle (GO:0016023);; Molecular Function: pectate lyase activity (GO:0030570);;	--	--	--	--	--	--	Probable pectate lyase 1 (Precursor) GN=At1g04680 OS=Arabidopsis thaliana (Mouse-ear cress) PE=2 SV=2	hypothetical protein OsI_02673 [Oryza sativa Indica Group]
c109135.graph_c0	8.99294	6.04995	0.245633	0.889743	9.9e-08	-3.72214	down	--	--	--	--	--	--	--	--	hypothetical protein MtrDRAFT_AC149129g40v2 [Medicago truncatula]
c109139.graph_c0	0.713366	0.262983	4.18507	5.15731	0.000251586	3.22785	up	Cellular Component: mitochondrion (GO:0005739);; Cellular Component: vacuole (GO:0005773);; Biological Process: sulfate transport (GO:0008272);; Molecular Function: molybdate ion transmembrane transporter activity (GO:0015098);; Molecular Function: sulfate transmembrane transporter activity (GO:0015116);; Biological Process: molybdate ion transport (GO:0015689);; Cellular Component: integral comp…	--	--	--	--	--	--	Molybdate transporter 1 GN=F3N11.13 OS=Arabidopsis thaliana (Mouse-ear cress) PE=1 SV=1	hypothetical protein MTR_3g108190 [Medicago truncatula]
c109156.graph_c0	37.7005	35.2505	8.30906	18.111	0.00782502	-1.49733	down	--	--	--	--	--	--	--	--	hypothetical protein MTR_3g086640 [Medicago truncatula]
c109157.graph_c0	76.0739	39.8653	1.17223	16.1883	0.00805145	-2.68788	down	--	--	--	--	--	--	F-box domain;; Protein of unknown function (DUF295)	--	Paired amphipathic helix protein Sin3 [Medicago truncatula]
c109203.graph_c0	2.18126	1.95852	0	0.0391692	8.5e-08	-6.67728	down	Biological Process: macromolecule metabolic process (GO:0043170);; Biological Process: single-organism cellular process (GO:0044763);; Biological Process: negative regulation of biological process (GO:0048519);;	--	--	--	--	--	--	--	Chromo domain-containing protein LHP1 [Medicago truncatula]
c109206.graph_c0	0	0	1.64516	3.36823	0.00341657		up	--	--	--	--	--	--	--	--	--
c109227.graph_c0	0	0	3.9171	2.42246	3.32e-08		up	--	--	--	--	--	--	--	--	--
c109310.graph_c0	8.47812	10.6308	0.895303	0.589638	9.15e-06	-3.80394	down	--	--	--	--	[R]	General function prediction only	C2H2-type zinc finger	Zinc finger protein ZAT11 GN=ZAT11 OS=Arabidopsis thaliana (Mouse-ear cress) PE=2 SV=1	C2H2 type zinc finger transcription factor family protein [Medicago truncatula]
c109338.graph_c0	0.396394	0.208759	3.51623	1.84537	0.00118195	3.04981	up	--	--	--	--	--	--	NPH3 family	BTB/POZ domain-containing protein At5g47800 GN=At5g47800 OS=Arabidopsis thaliana (Mouse-ear cress) PE=2 SV=1	PREDICTED: BTB/POZ domain-containing protein At5g47800-like isoform X1 [Cicer arietinum]
c109342.graph_c0	3.31261	2.54762	0.381619	0.575965	0.00545842	-2.6588	down	--	--	--	K01609|2.49435e-06|mtr:MTR_5g084030|Indole-3-glycerol phosphate synthase; K01609 indole-3-glycerol phosphate synthase [EC:4.1.1.48] (A)	--	--	--	--	--
c109343.graph_c0	4.49317	4.73259	0.440677	1.06416	0.0055516	-2.64754	down	--	--	--	--	--	--	--	--	hypothetical protein L484_017983 [Morus notabilis]
c109372.graph_c0	46.9131	23.5905	2.1757	1.94324	6.72e-05	-4.15948	down	--	--	--	--	--	--	U-box domain;; Zinc-finger of the MIZ type in Nse subunit	U-box domain-containing protein 21 GN=PUB21 OS=Arabidopsis thaliana (Mouse-ear cress) PE=2 SV=1	U-box domain-containing protein [Medicago truncatula]
c109374.graph_c0	13.5377	10.6767	0.0403336	0.767016	2.65e-13	-4.86676	down	--	--	--	--	--	--	F-box domain	--	PREDICTED: uncharacterized protein LOC101488742 isoform X1 [Cicer arietinum]
c109382.graph_c0	0	0	7.60413	3.67254	2.77e-08		up	--	--	--	--	--	--	--	--	--
c109395.graph_c0	8.1033	5.28163	40.7604	27.7712	1.33e-06	2.26664	up	--	[EH]	--	K01658|3.70593e-164|cam:101505192|anthranilate synthase component II-like; K01658 anthranilate synthase component II [EC:4.1.3.27] (A)	[E]	Amino acid transport and metabolism	Glutamine amidotransferase class-I;; Peptidase C26	Anthranilate synthase beta subunit 1, chloroplastic (Precursor) GN=F4F7.39 OS=Arabidopsis thaliana (Mouse-ear cress) PE=1 SV=1	PREDICTED: anthranilate synthase component II-like [Cicer arietinum]
c109423.graph_c0	22.3895	17.5206	4.75435	2.53708	0.000100326	-2.56451	down	--	--	--	--	--	--	--	--	hypothetical protein MTR_4g083110 [Medicago truncatula]
c109456.graph_c0	69.138	54.8112	7.72467	10.4638	1.37e-10	-2.82187	down	--	--	--	--	--	--	--	--	PREDICTED: cyclin-dependent kinase 12-like [Cicer arietinum]
c109493.graph_c0	183.588	113.509	28.9968	17.4079	9.81e-07	-2.774	down	--	[TZDR]	--	K13448|1.9674e-89|mtr:MTR_8g107110|SLR1/LCR-like protein; K13448 calcium-binding protein CML (A)	[T]	Signal transduction mechanisms	EF hand;; EF-hand domain pair;; EF-hand domain;; EF-hand domain pair;; EF hand;; EF-hand domain;; Secreted protein acidic and rich in cysteine Ca binding region;; Cytoskeletal-regulatory complex EF hand;; Caleosin related protein	Probable calcium-binding protein CML27 OS=Arabidopsis thaliana (Mouse-ear cress) PE=1 SV=1	SLR1/LCR-like protein [Medicago truncatula]
c109519.graph_c0	0	0.0653316	3.4513	3.12537	1.12e-07	6.48547	up	--	--	--	--	--	--	--	--	--
c109521.graph_c0	6.12651	3.35102	0.910091	0.329657	0.000325704	-3.0544	down	Molecular Function: magnesium ion binding (GO:0000287);; Biological Process: metabolic process (GO:0008152);; Molecular Function: terpene synthase activity (GO:0010333);;	--	--	K15086|0|mtr:MTR_2g089120|Myrcene synthase; K15086 (3S)-linalool synthase [EC:4.2.3.25] (A)	--	--	Terpene synthase family, metal binding domain;; Terpene synthase, N-terminal domain	Probable terpene synthase 11 GN=TPS11 OS=Ricinus communis (Castor bean) PE=3 SV=1	Myrcene synthase [Medicago truncatula]
c109572.graph_c0	12.4409	14.5552	2.80972	1.81125	1.33e-05	-2.66321	down	Biological Process: defense response (GO:0006952);; Biological Process: response to biotic stimulus (GO:0009607);;	--	--	--	--	--	Pathogenesis-related protein Bet v I family	Pathogenesis-related protein STH-2 GN=STH-2 OS=Solanum tuberosum (Potato) PE=2 SV=1	unknown [Medicago truncatula]
c109576.graph_c0	7.73009	8.72358	1.55841	1.41124	0.00877662	-2.56348	down	--	--	--	--	--	--	--	--	--
c109623.graph_c0	28.0649	35.2663	234.319	163.933	1.33e-09	2.53828	up	Biological Process: metabolic process (GO:0008152);; Molecular Function: peptidase inhibitor activity (GO:0030414);;	--	--	--	--	--	Bowman-Birk serine protease inhibitor family	Bowman-Birk type wound-induced trypsin inhibitor OS=Medicago sativa (Alfalfa) PE=1 SV=1	trypsin inhibitor [Pisum sativum]
c109635.graph_c0	6.48977	5.29207	0	1.43322	0.000569405	-2.98889	down	--	--	--	--	--	--	--	--	--
c109642.graph_c0	0	0	1.95541	2.86691	1.74e-05		up	Molecular Function: iron ion binding (GO:0005506);; Molecular Function: linoleate 13S-lipoxygenase activity (GO:0016165);; Biological Process: oxylipin biosynthetic process (GO:0031408);; Biological Process: oxidation-reduction process (GO:0055114);;	--	--	K00454|2.80332e-114|cam:101499921|linoleate 13S-lipoxygenase 2-1, chloroplastic-like; K00454 lipoxygenase [EC:1.13.11.12] (A)	--	--	Lipoxygenase	Linoleate 13S-lipoxygenase 2-1, chloroplastic (Precursor) GN=LOX2.1 OS=Solanum tuberosum (Potato) PE=1 SV=1	PREDICTED: linoleate 13S-lipoxygenase 2-1, chloroplastic-like [Cicer arietinum]
c109682.graph_c0	60.3353	31.921	4.07319	3.13272	4.18e-05	-3.7521	down	Molecular Function: metal ion binding (GO:0046872);;	--	--	--	[O]	Posttranslational modification, protein turnover, chaperones	Ring finger domain;; Zinc finger, C3HC4 type (RING finger);; Zinc finger, C3HC4 type (RING finger);; Zinc finger, C3HC4 type (RING finger)	E3 ubiquitin-protein ligase RING1-like GN=At3g19950 OS=Arabidopsis thaliana (Mouse-ear cress) PE=1 SV=1	RING finger protein [Medicago truncatula]
c109694.graph_c0	0	0.0512209	0.941171	0.932191	2.09e-06	5.03061	up	Molecular Function: ribonuclease activity (GO:0004540);; Molecular Function: protein serine/threonine kinase activity (GO:0004674);; Molecular Function: ATP binding (GO:0005524);; Biological Process: mRNA processing (GO:0006397);; Biological Process: protein phosphorylation (GO:0006468);;	[RTKL]	--	K08852|0|cam:101495825|serine/threonine-protein kinase ppk4-like; K08852 serine/threonine-protein kinase/endoribonuclease IRE1 [EC:2.7.11.1 3.1.26.-] (A)	[T]	Signal transduction mechanisms	Ribonuclease 2-5A;; Protein kinase domain;; Protein tyrosine kinase	Endoribonuclease (Precursor) GN=MJB20.8 OS=Arabidopsis thaliana (Mouse-ear cress) PE=1 SV=1	PREDICTED: serine/threonine-protein kinase ppk4-like [Cicer arietinum]
c109700.graph_c0	0	0	1.14907	1.37353	5.09e-08		up	Molecular Function: DNA binding (GO:0003677);; Molecular Function: chromatin binding (GO:0003682);;	--	--	--	--	--	Myb-like DNA-binding domain	Protein PHR1-LIKE 1 GN=PHL1 OS=Arabidopsis thaliana (Mouse-ear cress) PE=1 SV=1	myb-like DNA-binding domain, shaqkyf class protein [Medicago truncatula]
c109704.graph_c0	107.034	96.2874	52.2507	24.6451	0.000735761	-1.52782	down	Molecular Function: enzyme inhibitor activity (GO:0004857);; Molecular Function: pectinesterase activity (GO:0030599);; Biological Process: negative regulation of catalytic activity (GO:0043086);;	--	--	--	--	--	Plant invertase/pectin methylesterase inhibitor	Cell wall / vacuolar inhibitor of fructosidase 1 (Precursor) GN=T2J15.13 OS=Arabidopsis thaliana (Mouse-ear cress) PE=1 SV=1	hypothetical protein MTR_4g122800 [Medicago truncatula]
c109714.graph_c0	0.940637	0.330254	5.75227	9.21599	0.00565735	3.54537	up	Molecular Function: serine-type endopeptidase activity (GO:0004252);; Biological Process: proteolysis (GO:0006508);; Cellular Component: chloroplast (GO:0009507);; Molecular Function: serine-type exopeptidase activity (GO:0070008);;	[E]	Amino acid transport and metabolism	K01322|4.29947e-88|cam:101509843|PREP; prolyl endopeptidase; K01322 prolyl oligopeptidase [EC:3.4.21.26] (A)	[O]	Posttranslational modification, protein turnover, chaperones	Prolyl oligopeptidase family	--	prolyl oligopeptidase-like protein [Medicago truncatula]
c109730.graph_c0	31.6392	21.57	14.7429	8.03362	0.00912473	-1.32935	down	Molecular Function: DNA binding (GO:0003677);; Molecular Function: sequence-specific DNA binding transcription factor activity (GO:0003700);; Cellular Component: nucleus (GO:0005634);; Biological Process: regulation of transcription, DNA-templated (GO:0006355);;	--	--	K09286|3.88304e-88|mtr:MTR_4g100380|Ethylene-responsive transcription factor 1A; K09286 EREBP-like factor (A)	--	--	AP2 domain	Ethylene-responsive transcription factor 1A OS=Arabidopsis thaliana (Mouse-ear cress) PE=1 SV=2	ethylene response factor 11 [Medicago sativa]
c109755.graph_c0	0.196916	0.311114	3.21561	2.75016	0.000276582	3.44326	up	Molecular Function: copper ion binding (GO:0005507);; Molecular Function: electron carrier activity (GO:0009055);;	--	--	--	--	--	Plastocyanin-like domain	Early nodulin-like protein 1 (Precursor) GN=At2g25060 OS=Arabidopsis thaliana (Mouse-ear cress) PE=1 SV=2	unknown [Medicago truncatula]
c109782.graph_c0	0	0	11.2676	4.94477	1.14e-06		up	--	--	--	--	--	--	--	--	--
c109789.graph_c0	2.06852	0.925968	0	0.0849685	0.000351226	-5.06572	down	Molecular Function: catalytic activity (GO:0003824);; Biological Process: cellular process (GO:0009987);; Biological Process: macromolecule metabolic process (GO:0043170);; Biological Process: primary metabolic process (GO:0044238);; Molecular Function: organic cyclic compound binding (GO:0097159);; Molecular Function: heterocyclic compound binding (GO:1901363);;	[L]	Replication, recombination and repair	--	[R]	General function prediction only	Reverse transcriptase (RNA-dependent DNA polymerase);; Retroviral aspartyl protease;; Aspartyl protease;; Cauliflower mosaic virus peptidase (A3)	Uncharacterized mitochondrial protein AtMg00860 GN=AtMg00860 OS=Arabidopsis thaliana (Mouse-ear cress) PE=4 SV=1	PREDICTED: uncharacterized protein LOC102661730 [Glycine max]
c109801.graph_c0	1.24936	0.886242	0	0.139646	6.17e-05	-3.87883	down	--	--	--	--	--	--	--	--	--
c109808.graph_c0	20.9884	13.3283	0.983555	1.28034	1.05e-09	-3.96887	down	Cellular Component: peroxisomal matrix (GO:0005782);; Biological Process: protein folding (GO:0006457);; Biological Process: response to heat (GO:0009408);; Biological Process: response to high light intensity (GO:0009644);; Biological Process: response to hydrogen peroxide (GO:0042542);;	--	--	K13993|2.76806e-30|mtr:MTR_5g078040|15.7 kDa heat shock protein, peroxisomal; K13993 HSP20 family protein (A)	[O]	Posttranslational modification, protein turnover, chaperones	Hsp20/alpha crystallin family	15.7 kDa heat shock protein, peroxisomal GN=HSP15.7 OS=Arabidopsis thaliana (Mouse-ear cress) PE=2 SV=1	heat shock protein 15.9 [Medicago sativa]
c109811.graph_c0	7.08254	3.07723	0	0.193953	0.000923772	-5.63644	down	--	--	--	--	--	--	--	--	--
c109868.graph_c0	1.54001	0.147461	34.4622	37.5719	8.52e-18	5.40829	up	--	--	--	--	--	--	--	Non-specific lipid-transfer protein 8 (Precursor; Fragment) OS=Lens culinaris (Lentil) PE=1 SV=1	Non-specific lipid-transfer protein [Medicago truncatula]
c109958.graph_c0	39.7521	31.5025	6.06786	6.32422	8.27e-06	-2.59347	down	--	--	--	--	--	--	--	--	hypothetical protein MTR_8g105190 [Medicago truncatula]
c109962.graph_c0	2.56179	2.82992	0.15116	0.342213	0.000293923	-3.4868	down	--	--	--	--	--	--	--	--	hypothetical protein glysoja_038585 [Glycine soja]
c109991.graph_c0	8.63989	7.52842	0	0.774327	3.16e-06	-4.33644	down	--	--	--	--	--	--	--	--	--
c110088.graph_c0	12.7759	14.6041	2.51576	1.46454	1.55e-05	-2.90433	down	--	--	--	--	--	--	SBP domain;; Cell cycle and development regulator	Squamosa promoter-binding-like protein 3 GN=SPL3 OS=Arabidopsis thaliana (Mouse-ear cress) PE=1 SV=2	unknown [Medicago truncatula]
c110130.graph_c0	25.6248	12.9614	4.11532	2.06157	0.00538035	-2.74189	down	--	--	--	--	--	--	--	--	hypothetical protein MTR_1g108640 [Medicago truncatula]
c110215.graph_c0	20.9228	19.0014	184.809	191.395	1.98e-13	3.16031	up	--	--	--	--	--	--	--	--	--
c110271.graph_c0	11.5885	17.7332	0.528967	0.558847	5.2e-06	-4.848	down	--	--	--	--	--	--	--	--	hypothetical protein MTR_5g087510 [Medicago truncatula]
c110304.graph_c0	0.0428904	0	7.52275	5.54381	1.98e-11	8.23326	up	--	--	--	--	[R]	General function prediction only	--	--	hypothetical protein PRUPE_ppa015539mg [Prunus persica]
c110318.graph_c0	0.0725553	0	7.02114	6.07991	5.17e-12	7.48906	up	--	--	--	--	--	--	--	--	--
c110319.graph_c0	3.59311	3.29094	0	0.171123	1.57e-06	-5.28455	down	Molecular Function: DNA binding (GO:0003677);; Cellular Component: nucleus (GO:0005634);;	--	--	--	--	--	SBP domain	Squamosa promoter-binding protein 1 GN=SBP1 OS=Antirrhinum majus (Garden snapdragon) PE=2 SV=1	Squamosa promoter binding-like protein [Medicago truncatula]
c110320.graph_c0	0	0	3.97967	10.2748	0.00616894		up	--	--	--	--	--	--	--	--	--
c110353.graph_c0	118.636	127.331	59.633	47.9134	0.00723808	-1.29265	down	--	--	--	--	--	--	Polysaccharide biosynthesis	Protein IRX15-LIKE GN=IRX15-L OS=Arabidopsis thaliana (Mouse-ear cress) PE=2 SV=1	polysaccharide biosynthesis protein [Medicago truncatula]
c110368.graph_c0	23.3917	14.2198	1.1318	1.97663	8.65e-08	-3.62414	down	--	--	--	--	--	--	--	--	--
c110381.graph_c0	30.0174	15.2762	2.07833	1.13477	0.000111865	-3.91108	down	Molecular Function: acetylglucosaminyltransferase activity (GO:0008375);; Cellular Component: membrane (GO:0016020);;	--	--	--	--	--	Core-2/I-Branching enzyme;; Core-2/I-Branching enzyme	--	PREDICTED: uncharacterized protein LOC101490811 [Cicer arietinum]
c110421.graph_c0	0.886045	0.93326	5.26145	7.94094	0.00919554	2.80121	up	--	--	--	--	--	--	Albumin I	Albumin-1 D chain a (Precursor) OS=Pisum sativum (Garden pea) PE=1 SV=1	Albumin [Medicago truncatula]
c110428.graph_c0	0	0	6.80375	7.81745	3.97e-11		up	--	--	--	--	--	--	--	--	PREDICTED: uncharacterized protein LOC101504819 [Cicer arietinum]
c110460.graph_c0	1.57343	2.09339	0.250427	0.0907109	0.000266781	-3.58169	down	--	--	--	--	[R]	General function prediction only	zinc-binding in reverse transcriptase;; Reverse transcriptase (RNA-dependent DNA polymerase)	--	PREDICTED: uncharacterized protein LOC102663533 [Glycine max]
c110522.graph_c0	89.5147	68.5072	17.9371	20.557	6.2e-07	-2.0998	down	Molecular Function: triglyceride lipase activity (GO:0004806);; Biological Process: lipid metabolic process (GO:0006629);;	--	--	--	--	--	Lipase (class 3)	Lipase-like PAD4 GN=F22O6.190 OS=Arabidopsis thaliana (Mouse-ear cress) PE=1 SV=1	phytoalexin deficient protein [Medicago truncatula]
c110590.graph_c0	0.216055	0.227568	2.26498	1.97219	0.000570226	3.16252	up	--	--	--	--	--	--	--	--	--
c110600.graph_c0	0	0.123379	2.26707	1.36865	4e-06	4.68716	up	--	[J]	Translation, ribosomal structure and biogenesis	K01166|1.67328e-10|gmx:102663286|ribonuclease S-7-like; K01166 ribonuclease T2 [EC:3.1.27.1] (A)	[A]	RNA processing and modification	Ribonuclease T2 family	Ribonuclease S-4 (Precursor) OS=Pyrus pyrifolia (Chinese pear) PE=1 SV=2	ribonuclease S11 precursor [Prunus dulcis]
c110604.graph_c0	222.79	251.176	96.0555	55.6515	6.7e-05	-1.76538	down	Molecular Function: transporter activity (GO:0005215);; Biological Process: transport (GO:0006810);;	[M]	Cell wall/membrane/envelope biogenesis	K03098|3.33189e-101|pop:POPTR_0018s11910g|POPTRDRAFT_738040; hypothetical protein; K03098 apolipoprotein D and lipocalin family protein (A)	[M]	Cell wall/membrane/envelope biogenesis	Lipocalin-like domain;; Lipocalin / cytosolic fatty-acid binding protein family	--	unknown [Lotus japonicus]
c110640.graph_c0	36.3542	33.2834	9.51769	8.52667	1.14e-05	-2.03392	down	--	--	--	--	--	--	Protein of unknown function (DUF1442)	--	hypothetical protein MTR_5g011800 [Medicago truncatula]
c110776.graph_c0	4.45304	2.34516	0	0.424155	0.000450544	-3.93492	down	Molecular Function: cytochrome-c oxidase activity (GO:0004129);; Cellular Component: mitochondrial envelope (GO:0005740);; Molecular Function: intramolecular transferase activity (GO:0016866);; Biological Process: cellulose biosynthetic process (GO:0030244);;	--	--	K02265|3.70938e-22|mtr:MTR_2g103150|Cytochrome c oxidase subunit 5B; K02265 cytochrome c oxidase subunit 5b (A)	--	--	--	Alpha-1,4-glucan-protein synthase [UDP-forming] 2 GN=UPTG2 OS=Solanum tuberosum (Potato) PE=1 SV=1	cytochrome c oxidase subunit Vb [Pisum sativum]
c110846.graph_c0	0.0369199	0.0388872	0.535908	0.56618	7.13e-05	3.78113	up	--	--	--	--	--	--	Sieve element occlusion N-terminus;; Sieve element occlusion C-terminus	--	hypothetical protein MTR_7g032660 [Medicago truncatula]
c110891.graph_c0	4.36975	1.92109	0.0919258	0	0.000236419	-6.28234	down	--	--	--	--	--	--	--	--	--
c110902.graph_c0	0	0	3.43186	4.73563	5.73e-08		up	--	--	--	--	--	--	--	F-box/kelch-repeat protein At3g23880 GN=At3g23880 OS=Arabidopsis thaliana (Mouse-ear cress) PE=2 SV=1	F-box protein interaction domain protein [Medicago truncatula]
c110960.graph_c0	9.35661	5.82634	0.284728	0.451217	9.57e-07	-4.40065	down	Molecular Function: sequence-specific DNA binding transcription factor activity (GO:0003700);; Cellular Component: nucleus (GO:0005634);; Biological Process: regulation of transcription, DNA-templated (GO:0006355);; Molecular Function: sequence-specific DNA binding (GO:0043565);; Molecular Function: protein heterodimerization activity (GO:0046982);;	[B]	Chromatin structure and dynamics	--	[K]	Transcription	Histone-like transcription factor (CBF/NF-Y) and archaeal histone;; Core histone H2A/H2B/H3/H4	Nuclear transcription factor Y subunit B-3 OS=Arabidopsis thaliana (Mouse-ear cress) PE=2 SV=1	nuclear transcription factor Y subunit B13 [Medicago truncatula]
c110961.graph_c0	0	0	1.2115	1.41707	5.51e-08		up	--	--	--	--	--	--	--	--	--
c110965.graph_c0	51.2162	37.494	7.90878	8.05712	1.64e-06	-2.54229	down	Biological Process: response to hypoxia (GO:0001666);; Molecular Function: DNA binding (GO:0003677);; Cellular Component: nucleus (GO:0005634);; Biological Process: regulation of transcription, DNA-templated (GO:0006355);; Biological Process: regulation of cell size (GO:0008361);; Biological Process: response to light stimulus (GO:0009416);; Biological Process: response to wounding (GO:0009611);;…	--	--	--	--	--	No apical meristem (NAM) protein	Protein ATAF2 GN=T2K12.140 OS=Arabidopsis thaliana (Mouse-ear cress) PE=1 SV=1	NAC-domain protein [Medicago truncatula]
c110968.graph_c0	1.06891	0.980598	0	0.30216	0.00307695	-2.71636	down	Biological Process: lipid metabolic process (GO:0006629);; Molecular Function: hydrolase activity, acting on ester bonds (GO:0016788);;	--	--	--	--	--	GDSL-like Lipase/Acylhydrolase	GDSL esterase/lipase At5g45670 (Precursor) GN=At5g45670 OS=Arabidopsis thaliana (Mouse-ear cress) PE=2 SV=1	PREDICTED: GDSL esterase/lipase At1g29670-like [Cicer arietinum]
c111013.graph_c0	29.6885	21.1908	1.41355	5.84674	1.66e-09	-2.80032	down	Cellular Component: vacuole (GO:0005773);; Cellular Component: endoplasmic reticulum lumen (GO:0005788);; Biological Process: proteolysis (GO:0006508);; Molecular Function: cysteine-type peptidase activity (GO:0008234);; Molecular Function: 2-alkenal reductase [NAD(P)] activity (GO:0032440);; Cellular Component: aleurone grain (GO:0033095);; Biological Process: oxidation-reduction process (GO:005…	--	--	K16292|0|mtr:MTR_135s0001|Cysteine proteinase; K16292 KDEL-tailed cysteine endopeptidase [EC:3.4.22.-] (A)	[O]	Posttranslational modification, protein turnover, chaperones	Papain family cysteine protease;; Cathepsin propeptide inhibitor domain (I29)	Vignain-2 (Precursor) OS=Vigna mungo (Black gram) PE=1 SV=1	Cysteine proteinase [Medicago truncatula]
c111036.graph_c0	102.738	84.2073	42.7237	38.4928	0.00598101	-1.28349	down	Molecular Function: ribose-5-phosphate isomerase activity (GO:0004751);; Biological Process: pentose-phosphate shunt, non-oxidative branch (GO:0009052);;	[G]	Carbohydrate transport and metabolism	K01807|4.61044e-166|mtr:MTR_1g108440|hypothetical protein; K01807 ribose 5-phosphate isomerase A [EC:5.3.1.6] (A)	[G]	Carbohydrate transport and metabolism	Ribose 5-phosphate isomerase A (phosphoriboisomerase A)	Probable ribose-5-phosphate isomerase 1 GN=F23N20.9 OS=Arabidopsis thaliana (Mouse-ear cress) PE=1 SV=1	ribose-5-phosphate isomerase A [Medicago truncatula]
c111071.graph_c0	8.12841	12.7152	1.07084	0.176311	0.000132291	-4.2589	down	--	--	--	--	--	--	--	--	--
c111078.graph_c0	10.3171	5.28429	0.538344	1.32955	0.00185971	-3.0638	down	--	--	--	--	--	--	Protein of unknown function (DUF1442)	--	hypothetical protein MTR_4g102220 [Medicago truncatula]
c111120.graph_c0	81.0872	74.3182	24.6759	6.56751	8.44e-09	-2.47005	down	Molecular Function: DNA binding (GO:0003677);; Molecular Function: sequence-specific DNA binding transcription factor activity (GO:0003700);; Cellular Component: nucleus (GO:0005634);; Biological Process: regulation of transcription, DNA-templated (GO:0006355);; Cellular Component: membrane (GO:0016020);; Biological Process: single-organism process (GO:0044699);;	--	--	--	--	--	AP2 domain	Ethylene-responsive transcription factor 9 GN=MLN1.14 OS=Arabidopsis thaliana (Mouse-ear cress) PE=2 SV=1	PREDICTED: ethylene-responsive transcription factor 4-like [Cicer arietinum]
c111132.graph_c1	39.4584	28.0931	13.7689	14.6748	0.0054198	-1.31202	down	Biological Process: protein folding (GO:0006457);; Biological Process: response to heat (GO:0009408);; Biological Process: response to high light intensity (GO:0009644);; Molecular Function: heat shock protein binding (GO:0031072);; Biological Process: response to endoplasmic reticulum stress (GO:0034976);; Biological Process: response to hydrogen peroxide (GO:0042542);; Molecular Function: unfol…	[O]	Posttranslational modification, protein turnover, chaperones	K09510|0|mtr:MTR_4g078850|Chaperone protein dnaJ; K09510 DnaJ homolog subfamily B member 4 (A)	[O]	Posttranslational modification, protein turnover, chaperones	DnaJ domain;; DnaJ C terminal domain	DnaJ protein homolog 1 (Precursor; Fragment) GN=DNAJ1 OS=Allium porrum (Leek) PE=2 SV=1	Chaperone protein dnaJ [Medicago truncatula]
c111162.graph_c0	317.604	258.181	54.9634	20.3177	1.33e-12	-3.06969	down	Molecular Function: sequence-specific DNA binding transcription factor activity (GO:0003700);; Molecular Function: transcription coactivator activity (GO:0003713);; Cellular Component: nucleolus (GO:0005730);; Biological Process: protein folding (GO:0006457);; Biological Process: response to heat (GO:0009408);; Biological Process: response to water deprivation (GO:0009414);; Biological Process: r…	[K]	Transcription	K03627|1.10836e-59|cam:101513565|multiprotein-bridging factor 1c-like; K03627 putative transcription factor (A)	[K]	Transcription	Multiprotein bridging factor 1;; Helix-turn-helix	Multiprotein-bridging factor 1c GN=MBF1C OS=Arabidopsis thaliana (Mouse-ear cress) PE=1 SV=1	PREDICTED: multiprotein-bridging factor 1c-like [Cicer arietinum]
c111167.graph_c0	311.812	336.079	73.0837	55.5368	2.61e-08	-2.43555	down	--	--	--	--	--	--	C2 domain	--	unknown [Medicago truncatula]
c111195.graph_c0	13.5233	6.92738	0.0893883	1.13325	0.000147352	-4.01297	down	--	--	--	--	--	--	--	--	--
c111211.graph_c0	0.813471	0.725001	10.067	5.82619	0.000194344	3.25647	up	--	--	--	--	--	--	Late embryogenesis abundant protein	--	unknown [Medicago truncatula]
c111225.graph_c1	0.161159	0.0565823	26.512	14.7698	2.78e-15	7.48711	up	--	--	--	--	--	--	--	--	--
c111248.graph_c0	2.16995	2.69372	0	0.509342	0.000583396	-3.2221	down	--	--	--	--	--	--	--	--	--
c111263.graph_c0	0	0	3.7968	2.45588	1.15e-08		up	--	--	--	--	--	--	--	--	--
c111269.graph_c0	46.6603	35.7342	0.252973	2.90172	3.18e-25	-4.67329	down	Molecular Function: transferase activity, transferring acyl groups other than amino-acyl groups (GO:0016747);;	--	--	--	--	--	Transferase family	Uncharacterized acetyltransferase At3g50280 GN=At3g50280 OS=Arabidopsis thaliana (Mouse-ear cress) PE=3 SV=1	Acetyltransferase, putative [Medicago truncatula]
c111293.graph_c0	0.947137	0.906916	238.144	172.363	4.58e-50	7.68937	up	--	--	--	--	--	--	--	--	PREDICTED: uncharacterized protein LOC101494553 [Cicer arietinum]
c111303.graph_c0	331.877	201.965	96.0238	59.8186	0.000793474	-1.86881	down	Molecular Function: translation initiation factor activity (GO:0003743);; Biological Process: translational initiation (GO:0006413);;	[J]	Translation, ribosomal structure and biogenesis	K03113|5.17591e-68|cam:101512087|protein translation factor SUI1 homolog 2-like; K03113 translation initiation factor 1 (A)	[J]	Translation, ribosomal structure and biogenesis	Translation initiation factor SUI1	Protein translation factor SUI1 homolog 2 GN=At1g54290 OS=Arabidopsis thaliana (Mouse-ear cress) PE=3 SV=1	PREDICTED: protein translation factor SUI1 homolog 2-like [Cicer arietinum]
c111345.graph_c0	13.5673	8.19213	0.0421884	1.41356	6.32e-08	-3.84639	down	--	--	--	--	--	--	--	--	--
c111349.graph_c0	0.347305	0.426781	7.21183	5.8967	1.22e-05	3.97837	up	Molecular Function: transporter activity (GO:0005215);; Biological Process: transport (GO:0006810);; Cellular Component: integral component of membrane (GO:0016021);;	--	--	K09874|2.5061e-117|mtr:MTR_2g017570|Aquaporin NIP1-2; K09874 aquaporin NIP (A)	[G]	Carbohydrate transport and metabolism	Major intrinsic protein	Aquaporin NIP1-2, N-terminally processed GN=F13C5.80 OS=Arabidopsis thaliana (Mouse-ear cress) PE=2 SV=2	Aquaporin NIP1-2 [Medicago truncatula]
c111376.graph_c0	0.046737	0	1.86562	2.40616	2.07e-07	6.53245	up	--	--	--	--	--	--	--	--	--
c111402.graph_c0	1.82651	1.8695	0.112341	0.655607	0.00344132	-2.26104	down	Biological Process: activation of MAPKK activity (GO:0000186);; Molecular Function: MAP kinase kinase kinase activity (GO:0004709);; Molecular Function: phosphoprotein phosphatase activity (GO:0004721);; Molecular Function: ATP binding (GO:0005524);; Cellular Component: integral component of membrane (GO:0016021);; Molecular Function: 2-alkenal reductase [NAD(P)] activity (GO:0032440);; Biologica…	[RTKL]	--	--	--	--	Leucine Rich repeats (2 copies);; Leucine rich repeat;; Leucine Rich Repeat;; Protein tyrosine kinase;; Protein kinase domain;; Leucine Rich repeat;; Leucine rich repeat N-terminal domain;; Leucine rich repeat	Leucine-rich repeat receptor protein kinase EXS (Precursor) GN=T28J14.220 OS=Arabidopsis thaliana (Mouse-ear cress) PE=1 SV=1	LRR receptor-like kinase family protein [Medicago truncatula]
c111523.graph_c0	17.4743	9.57337	0.0486472	1.16741	7.4e-07	-4.4187	down	Molecular Function: ATP binding (GO:0005524);; Biological Process: defense response (GO:0006952);; Biological Process: signal transduction (GO:0007165);; Molecular Function: nucleoside-triphosphatase activity (GO:0017111);; Molecular Function: ADP binding (GO:0043531);;	--	--	--	--	--	Leucine Rich repeats (2 copies);; Leucine rich repeat;; Leucine Rich Repeat	Protein SUPPRESSOR OF npr1-1, CONSTITUTIVE 1 OS=Arabidopsis thaliana (Mouse-ear cress) PE=1 SV=3	Resistance protein [Medicago truncatula]
c111624.graph_c0	1.07744	1.45909	0	0.295051	0.00105227	-3.07404	down	--	--	--	--	--	--	--	--	U-box domain-containing protein [Medicago truncatula]
c111669.graph_c0	0.0238231	0	18.8174	8.84635	9.84e-11	10.136	up	Biological Process: carbohydrate metabolic process (GO:0005975);; Molecular Function: glucan endo-1,3-beta-D-glucosidase activity (GO:0042973);; Molecular Function: cation binding (GO:0043169);;	--	--	--	--	--	Glycosyl hydrolases family 17;; X8 domain	Glucan endo-1,3-beta-glucosidase (Precursor) GN=GLC1 OS=Triticum aestivum (Wheat) PE=2 SV=1	O-glycosyl hydrolase family 17 protein [Medicago truncatula]
c111675.graph_c1	1.98153	1.02136	0	0	6.27e-06		down	--	--	--	--	--	--	--	--	--
c111720.graph_c0	1.84254	1.3113	0.150593	0.381839	0.00654229	-2.57948	down	Molecular Function: UDP-N-acetylmuramate dehydrogenase activity (GO:0008762);; Molecular Function: reticuline oxidase activity (GO:0050468);; Molecular Function: flavin adenine dinucleotide binding (GO:0050660);; Biological Process: oxidation-reduction process (GO:0055114);;	[C]	Energy production and conversion	--	--	--	FAD binding domain;; Berberine and berberine like	Cannabidiolic acid synthase (Precursor) GN=CBDAS OS=Cannabis sativa (Hemp) PE=1 SV=1	Reticuline oxidase-like protein [Medicago truncatula]
c111731.graph_c0	3.66782	2.54721	23.8897	18.7639	4.77e-07	2.69591	up	Molecular Function: glutathione transferase activity (GO:0004364);; Cellular Component: cytoplasm (GO:0005737);; Biological Process: aromatic amino acid family metabolic process (GO:0009072);;	[O]	Posttranslational modification, protein turnover, chaperones	K01800|2.83752e-135|cam:101490720|glutathione S-transferase zeta class-like; K01800 maleylacetoacetate isomerase [EC:5.2.1.2] (A)	[O]	Posttranslational modification, protein turnover, chaperones	Glutathione S-transferase, N-terminal domain;; Glutathione S-transferase, N-terminal domain;; Glutathione S-transferase, N-terminal domain;; Glutathione S-transferase, C-terminal domain;; Glutathione S-transferase, C-terminal domain	Glutathione S-transferase zeta class OS=Euphorbia esula (Leafy spurge) PE=2 SV=1	PREDICTED: glutathione S-transferase zeta class-like isoform X2 [Cicer arietinum]
c111734.graph_c0	13.2002	13.0326	3.48241	3.62322	0.000454027	-1.96333	down	--	--	--	--	[R]	General function prediction only	Galactose oxidase, central domain;; Kelch motif;; Galactose oxidase, central domain;; Kelch motif;; Kelch motif;; Kelch motif;; PQQ-like domain	Nitrile-specifier protein 5 GN=NSP5 OS=Arabidopsis thaliana (Mouse-ear cress) PE=2 SV=1	PREDICTED: nitrile-specifier protein 5-like [Cicer arietinum]
c111761.graph_c0	0	0	3.72524	2.95753	1.79e-09		up	--	--	--	--	--	--	--	Protein IQ-DOMAIN 1 GN=IQD1 OS=Arabidopsis thaliana (Mouse-ear cress) PE=1 SV=1	PREDICTED: protein IQ-DOMAIN 1-like [Cicer arietinum]
c111775.graph_c0	4.44581	2.37176	0	0	1.2e-07		down	--	--	--	--	--	--	--	--	--
c111828.graph_c0	14.8576	13.2997	0.101825	0.368834	2.35e-15	-5.90853	down	--	--	--	--	--	--	--	--	--
c111873.graph_c0	73.1241	67.1234	1683.59	1139.88	2.63e-17	4.22768	up	--	--	--	--	--	--	--	--	--
c111939.graph_c0	19.8471	12.0856	3.50109	2.83076	0.000132041	-2.4102	down	Molecular Function: DNA binding (GO:0003677);; Molecular Function: sequence-specific DNA binding transcription factor activity (GO:0003700);; Cellular Component: nucleus (GO:0005634);; Biological Process: regulation of transcription, DNA-templated (GO:0006355);; Molecular Function: protein dimerization activity (GO:0046983);;	--	--	K09264|6.25309e-124|gmx:100811049|developmental protein SEPALLATA 1-like; K09264 MADS-box transcription factor, plant (A)	[K]	Transcription	K-box region;; SRF-type transcription factor (DNA-binding and dimerisation domain)	MADS-box protein CMB1 GN=CMB1 OS=Dianthus caryophyllus (Carnation) PE=2 SV=1	PREDICTED: developmental protein SEPALLATA 1-like [Glycine max]
c112022.graph_c0	7.18744	5.08152	0.416838	1.13242	0.00045237	-2.99471	down	--	--	--	--	--	--	--	--	--
c112034.graph_c0	0	0	3.53493	3.07798	9.09e-09		up	--	--	--	--	--	--	--	--	--
c112079.graph_c0	2.5033	0.944489	0	0	0.00185254		down	--	--	--	--	--	--	--	--	PREDICTED: uncharacterized protein LOC102601910 [Solanum tuberosum]
c112202.graph_c0	25.0131	24.3761	82.4978	50.5087	0.00573409	1.3167	up	Molecular Function: kinase activity (GO:0016301);; Biological Process: phosphorylation (GO:0016310);; Biological Process: cellular protein metabolic process (GO:0044267);;	--	--	K03094|2.01951e-56|mtr:MTR_2g018980|Kinase-like protein; K03094 S-phase kinase-associated protein 1 (A)	[O]	Posttranslational modification, protein turnover, chaperones	Skp1 family, dimerisation domain;; Skp1 family, tetramerisation domain	SKP1-like protein 14 GN=ASK14 OS=Arabidopsis thaliana (Mouse-ear cress) PE=1 SV=1	SCF ubiquitin ligase, SKP1 component [Medicago truncatula]
c112226.graph_c0	32.9873	27.0309	11.0564	14.8258	0.00832236	-1.26864	down	--	--	--	--	--	--	--	--	unknown [Medicago truncatula]
c112249.graph_c0	2.92605	2.5506	0.0610242	0.0552612	4.19e-08	-5.64045	down	--	--	--	--	--	--	ATHILA ORF-1 family	--	hypothetical protein JCGZ_18398 [Jatropha curcas]
c112254.graph_c0	75.1985	75.98	32.6332	24.1203	0.000843861	-1.51553	down	Molecular Function: ATP binding (GO:0005524);; Cellular Component: mitochondrion (GO:0005739);; Biological Process: protein folding (GO:0006457);; Biological Process: response to stress (GO:0006950);; Molecular Function: unfolded protein binding (GO:0051082);;	[O]	Posttranslational modification, protein turnover, chaperones	K04043|7.57909e-139|gmx:100804559|heat shock 70 kDa protein, mitochondrial-like; K04043 molecular chaperone DnaK (A)	[O]	Posttranslational modification, protein turnover, chaperones	Hsp70 protein	Heat shock 70 kDa protein, mitochondrial (Precursor) GN=HSP1 OS=Pisum sativum (Garden pea) PE=2 SV=1	PREDICTED: heat shock 70 kDa protein, mitochondrial-like [Glycine max]
c112260.graph_c0	0	0.0734871	1.68788	2.13988	8.27e-07	5.55656	up	--	--	--	--	--	--	--	--	--
c112347.graph_c0	68.0125	40.2957	5.83667	6.9529	1.87e-06	-3.13186	down	--	--	--	--	[R]	General function prediction only	C2H2-type zinc finger	Zinc finger protein AZF2 OS=Arabidopsis thaliana (Mouse-ear cress) PE=2 SV=1	Zinc finger protein [Medicago truncatula]
c112393.graph_c0	3.42411	2.91595	32.5181	17.5565	4.57e-05	2.86675	up	Cellular Component: extracellular region (GO:0005576);; Cellular Component: plasmodesma (GO:0009506);; Biological Process: response to gibberellin (GO:0009739);; Biological Process: response to salicylic acid (GO:0009751);; Biological Process: heat acclimation (GO:0010286);;	--	--	--	--	--	Gibberellin regulated protein	Protein RSI-1 (Precursor) GN=RSI-1 OS=Solanum lycopersicum (Tomato) PE=2 SV=1	GASA5-like protein [Medicago truncatula]
c112443.graph_c0	2.96043	1.76697	0.517255	0.28825	0.00522223	-2.65171	down	Molecular Function: protein serine/threonine kinase activity (GO:0004674);; Molecular Function: ATP binding (GO:0005524);; Biological Process: protein phosphorylation (GO:0006468);;	--	--	K04733|1.44325e-65|pop:POPTR_0009s02580g|POPTRDRAFT_878434; hypothetical protein; K04733 interleukin-1 receptor-associated kinase 4 [EC:2.7.11.1] (A)	[T]	Signal transduction mechanisms	Protein kinase domain;; Protein tyrosine kinase;; Protein tyrosine kinase;; Protein kinase domain	Probable serine/threonine-protein kinase Cx32, chloroplastic (Precursor) GN=At4g35600 OS=Arabidopsis thaliana (Mouse-ear cress) PE=1 SV=2	F22G5.5 [Arabidopsis thaliana]
c112444.graph_c0	0	0	3.00801	5.94314	0.00263452		up	--	--	--	--	--	--	--	--	--
c112465.graph_c0	0.0337683	0	1.71556	1.62752	1.49e-07	6.62797	up	Biological Process: primary metabolic process (GO:0044238);; Biological Process: cellular macromolecule metabolic process (GO:0044260);;	--	--	--	[R]	General function prediction only	gag-polypeptide of LTR copia-type;; GAG-pre-integrase domain	--	PREDICTED: uncharacterized protein LOC102660325 [Glycine max]
c112471.graph_c0	0.597715	0.193713	5.67283	3.67655	0.000158893	3.49464	up	Molecular Function: DNA binding (GO:0003677);;	--	--	--	--	--	Domain of unknown function (DUF296)	Putative DNA-binding protein ESCAROLA GN=ESC OS=Arabidopsis thaliana (Mouse-ear cress) PE=2 SV=1	DNA-binding PD1-like protein [Medicago truncatula]
c112495.graph_c0	36.825	42.0511	16.6769	13.3311	0.00203464	-1.49624	down	--	--	--	--	--	--	AAA domain;; AAA domain;; AAA domain;; Chloramphenicol phosphotransferase-like protein	--	PREDICTED: uncharacterized protein LOC101501024 [Cicer arietinum]
c112535.graph_c0	79.7449	65.2677	2.21386	20.7161	8.17e-09	-2.63383	down	--	--	--	--	--	--	--	--	hypothetical protein MTR_3g086650 [Medicago truncatula]
c112550.graph_c0	51.0314	24.0883	2184.96	1725.62	5.12e-31	5.63427	up	--	[M]	Cell wall/membrane/envelope biogenesis	--	--	--	--	Repetitive proline-rich cell wall protein 2 (Precursor) GN=PRP2 OS=Glycine max (Soybean) PE=2 SV=1	extensin-like repeat protein [Medicago truncatula]
c112564.graph_c0	3.38893	2.46467	0.0488013	0.441926	0.000146691	-3.54521	down	--	--	--	--	--	--	--	--	--
c112571.graph_c0	4.55754	4.24355	0.617443	0.459288	9.72e-06	-3.12934	down	Molecular Function: transferase activity (GO:0016740);;	[R]	General function prediction only	--	[R]	General function prediction only	WD domain, G-beta repeat;; Nup133 N terminal like;; PQQ-like domain	--	transducin/WD40 repeat protein [Medicago truncatula]
c112575.graph_c1	0.432978	0.342038	6.28486	8.24056	3e-06	4.1731	up	--	--	--	--	--	--	--	--	unknown [Medicago truncatula]
c112599.graph_c0	11.4045	15.336	0.669666	4.79075	0.00767176	-2.29135	down	--	--	--	--	[R]	General function prediction only	--	--	senescence-associated protein, putative [Medicago truncatula]
c112605.graph_c0	0.0842911	0	2.39606	1.15414	5.91e-05	5.35233	up	Molecular Function: metal ion binding (GO:0046872);;	--	--	--	[K]	Transcription	RING/Ubox like zinc-binding domain	--	CCR4-NOT transcription complex subunit [Medicago truncatula]
c112628.graph_c0	5.21853	1.8322	16.9333	23.0466	0.00470168	2.48081	up	Molecular Function: copper ion binding (GO:0005507);; Cellular Component: plant-type cell wall (GO:0009505);; Cellular Component: membrane (GO:0016020);; Molecular Function: oxidoreductase activity (GO:0016491);; Cellular Component: apoplast (GO:0048046);; Biological Process: oxidation-reduction process (GO:0055114);;	--	--	--	[Q]	Secondary metabolites biosynthesis, transport and catabolism	Multicopper oxidase	L-ascorbate oxidase homolog (Precursor) OS=Nicotiana tabacum (Common tobacco) PE=1 SV=1	unknown [Lotus japonicus]
c112671.graph_c0	2.45937	2.89518	0	0.633871	0.00128431	-3.04312	down	--	--	--	--	--	--	Tubby C 2	Protein LURP-one-related 6 GN=At2g05910 OS=Arabidopsis thaliana (Mouse-ear cress) PE=2 SV=1	hypothetical protein MTR_2g042230 [Medicago truncatula]
c112686.graph_c0	0	0.0614177	28.8835	13.7006	5.1e-11	9.22896	up	Cellular Component: vacuole (GO:0005773);; Cellular Component: aleurone grain (GO:0033095);; Molecular Function: nutrient reservoir activity (GO:0045735);;	--	--	--	--	--	Cupin;; Cupin domain	Vicilin (Precursor) OS=Vicia faba (Broad bean) PE=2 SV=1	vicilin precursor [Vicia faba var. minor]
c112751.graph_c0	66.4057	50.7075	1.53899	3.28183	8.4e-24	-4.62746	down	Molecular Function: carbonate dehydratase activity (GO:0004089);; Biological Process: one-carbon metabolic process (GO:0006730);; Molecular Function: zinc ion binding (GO:0008270);;	[P]	Inorganic ion transport and metabolism	K01674|1.60473e-132|cam:101501720|bifunctional monodehydroascorbate reductase and carbonic anhydrase nectarin-3-like; K01674 carbonic anhydrase [EC:4.2.1.1] (A)	[R]	General function prediction only	Eukaryotic-type carbonic anhydrase	Alpha carbonic anhydrase 7 (Precursor) GN=ACA7 OS=Arabidopsis thaliana (Mouse-ear cress) PE=2 SV=1	PREDICTED: bifunctional monodehydroascorbate reductase and carbonic anhydrase nectarin-3-like [Cicer arietinum]
c112752.graph_c0	37.4603	36.2631	11.3689	14.7971	0.000645543	-1.55829	down	Molecular Function: alditol:NADP+ 1-oxidoreductase activity (GO:0004032);; Biological Process: oxidation-reduction process (GO:0055114);;	[R]	General function prediction only	--	[R]	General function prediction only	Aldo/keto reductase family	Aldo-keto reductase family 4 member C9 GN=AKR4C9 OS=Arabidopsis thaliana (Mouse-ear cress) PE=1 SV=1	Aldo-keto reductase family 4 member C9 [Glycine soja]
c112767.graph_c0	24.5001	25.9141	5.5619	8.3067	5.42e-05	-1.92095	down	--	--	--	--	[R]	General function prediction only	Kelch motif;; Kelch motif;; Galactose oxidase, central domain;; Galactose oxidase, central domain;; Kelch motif;; F-box domain	F-box/kelch-repeat protein At2g44130 GN=At2g44130 OS=Arabidopsis thaliana (Mouse-ear cress) PE=2 SV=2	F-box/kelch-repeat protein [Medicago truncatula]
c112768.graph_c0	5.94077	5.76215	18.8182	21.8162	0.00216087	1.72454	up	Molecular Function: acid phosphatase activity (GO:0003993);;	--	--	--	--	--	HAD superfamily, subfamily IIIB (Acid phosphatase)	Stem 28 kDa glycoprotein (Precursor) GN=VSPA OS=Glycine max (Soybean) PE=2 SV=1	PREDICTED: stem 28 kDa glycoprotein-like [Cicer arietinum]
c112769.graph_c0	21.7684	17.3675	1.69881	3.39012	5.01e-10	-2.97348	down	Molecular Function: protein serine/threonine kinase activity (GO:0004674);; Molecular Function: ATP binding (GO:0005524);; Biological Process: protein phosphorylation (GO:0006468);; Biological Process: recognition of pollen (GO:0048544);;	--	--	--	--	--	D-mannose binding lectin;; S-locus glycoprotein family	G-type lectin S-receptor-like serine/threonine-protein kinase RLK1 (Precursor) GN=RLK1 OS=Arabidopsis thaliana (Mouse-ear cress) PE=2 SV=2	S-locus-specific glycoprotein S6 [Medicago truncatula]
c112832.graph_c0	1.60419	0.675871	35.1612	65.579	0.00134423	5.4556	up	--	[S]	Function unknown	K13449|1.1591e-87|mtr:MTR_2g010600|Pathogenesis-related protein 1a; K13449 pathogenesis-related protein 1 (A)	[S]	Function unknown	Cysteine-rich secretory protein family	Pathogenesis-related protein 1B (Precursor) OS=Nicotiana tabacum (Common tobacco) PE=2 SV=1	Pathogenesis-related protein 1a [Medicago truncatula]
c112917.graph_c0	6.03943	6.68065	2.04796	1.35631	0.00453687	-2.01444	down	--	--	--	--	--	--	Protein of unknown function (DUF677);; Protein of unknown function (DUF793)	UPF0496 protein At4g34320 GN=At4g34320 OS=Arabidopsis thaliana (Mouse-ear cress) PE=2 SV=1	UPF0496 plant-like protein [Medicago truncatula]
c112943.graph_c1	4.38839	1.51549	0.0435105	0	0.00443526	-7.2617	down	--	--	--	--	--	--	Dof domain, zinc finger	Dof zinc finger protein DOF3.5 GN=DOF3.5 OS=Arabidopsis thaliana (Mouse-ear cress) PE=3 SV=1	Dof zinc finger protein [Medicago truncatula]
c112976.graph_c0	27.9996	34.4508	13.9359	12.0728	0.00630755	-1.36352	down	--	[I]	Lipid transport and metabolism	K14424|0|mtr:MTR_5g035190|Sterol 4-alpha-methyl-oxidase; K14424 4-alpha-methyl-delta7-sterol-4alpha-methyl oxidase [EC:1.14.13.72] (A)	[I]	Lipid transport and metabolism	Fatty acid hydroxylase superfamily	Methylsterol monooxygenase 2-2 GN=F22G5.23 OS=Arabidopsis thaliana (Mouse-ear cress) PE=2 SV=1	Sterol 4-alpha-methyl-oxidase [Medicago truncatula]
c112978.graph_c0	4.89915	3.58971	0.846586	0.16666	0.000147879	-3.22569	down	--	[F]	Nucleotide transport and metabolism	K01488|0|cam:101490838|adenosine deaminase-like protein-like; K01488 adenosine deaminase [EC:3.5.4.4] (A)	[F]	Nucleotide transport and metabolism	Adenosine/AMP deaminase	--	unknown [Medicago truncatula]
c113018.graph_c0	4.30218	6.75092	0.106204	0	4.31e-06	-6.9373	down	--	[L]	Replication, recombination and repair	--	--	--	Reverse transcriptase-like;; RNase H	--	PREDICTED: ribonuclease HI-like [Cicer arietinum]
c113055.graph_c0	4.68413	4.34786	32.8629	16.2586	0.00601299	2.31973	up	--	[E]	Amino acid transport and metabolism	K01738|0|gmx:100804065|cysteine synthase-like; K01738 cysteine synthase A [EC:2.5.1.47] (A)	[E]	Amino acid transport and metabolism	Pyridoxal-phosphate dependent enzyme	Cysteine synthase OS=Citrullus lanatus (Watermelon) PE=1 SV=1	PREDICTED: cysteine synthase-like isoform X1 [Glycine max]
c113119.graph_c0	27.7674	37.4686	8.10033	7.28862	0.000484734	-2.18479	down	Biological Process: cellular response to DNA damage stimulus (GO:0006974);; Molecular Function: hydrolase activity (GO:0016787);;	[F]	Nucleotide transport and metabolism	K03574|4.1862e-82|mtr:MTR_5g062660|Nudix hydrolase; K03574 8-oxo-dGTP diphosphatase [EC:3.6.1.55] (A)	--	--	NUDIX domain	Nudix hydrolase 1 GN=F14K14.13 OS=Arabidopsis thaliana (Mouse-ear cress) PE=1 SV=1	Nudix hydrolase [Medicago truncatula]
c113135.graph_c0	0.239039	0.035968	3.51105	6.58338	0.00377863	5.2164	up	--	[R]	General function prediction only	--	[QR]	--	non-haem dioxygenase in morphine synthesis N-terminal;; 2OG-Fe(II) oxygenase superfamily	Protein SRG1 GN=SRG1 OS=Arabidopsis thaliana (Mouse-ear cress) PE=2 SV=1	2OG-Fe(II) oxygenase family oxidoreductase [Medicago truncatula]
c113143.graph_c0	0	0.436239	3.8075	4.446	2.47e-05	4.09028	up	--	--	--	--	--	--	--	--	--
c113161.graph_c0	1.80763	1.22835	0.246867	0.0638724	0.000371246	-3.43319	down	--	--	--	--	[TU]	--	ANTH domain	Putative clathrin assembly protein At2g25430 GN=At2g25430 OS=Arabidopsis thaliana (Mouse-ear cress) PE=1 SV=2	epsin N-terminal homology (ENTH) domain-containing protein [Medicago truncatula]
c113185.graph_c1	0	0	4.29638	6.06333	6.23e-09		up	--	--	--	--	--	--	F-box domain;; F-box-like;; F-box associated	Putative F-box protein At3g16210 GN=At3g16210 OS=Arabidopsis thaliana (Mouse-ear cress) PE=3 SV=1	F-box protein interaction domain; Galactose oxidase, central [Medicago truncatula]
c113200.graph_c0	63.2126	66.3051	22.9786	20.378	0.000145395	-1.67064	down	--	--	--	--	--	--	Protein of unknown function (DUF3339)	--	PREDICTED: uncharacterized protein LOC101502465 [Cicer arietinum]
c113243.graph_c0	0.0725553	0.0382108	5.3975	7.431	6.07e-09	6.81957	up	--	--	--	--	--	--	ATHILA ORF-1 family	--	hypothetical protein JCGZ_15248 [Jatropha curcas]
c113258.graph_c0	1.73738	1.32761	0.164828	0.186578	0.000807936	-3.18779	down	--	--	--	--	[Q]	Secondary metabolites biosynthesis, transport and catabolism	ABC-2 type transporter	ABC transporter G family member 11 GN=At1g17840 OS=Arabidopsis thaliana (Mouse-ear cress) PE=1 SV=1	white-brown-complex ABC transporter family protein [Medicago truncatula]
c113276.graph_c0	8.58073	2.25949	55.9586	38.9249	5.72e-11	3.07267	up	--	[T]	Signal transduction mechanisms	--	--	--	Universal stress protein family	Universal stress protein A-like protein GN=At3g01520 OS=Arabidopsis thaliana (Mouse-ear cress) PE=1 SV=2	Universal stress protein A-like protein [Medicago truncatula]
c113283.graph_c0	8.60094	5.50329	1.16679	0.836473	0.000201748	-2.90125	down	--	[O]	Posttranslational modification, protein turnover, chaperones	--	[O]	Posttranslational modification, protein turnover, chaperones	Ring finger domain;; RING-H2 zinc finger;; Zinc finger, C3HC4 type (RING finger);; Zinc finger, C3HC4 type (RING finger);; Anaphase-promoting complex subunit 11 RING-H2 finger	RING-H2 finger protein ATL54 GN=ATL54 OS=Arabidopsis thaliana (Mouse-ear cress) PE=2 SV=2	zinc finger, C3HC4 type (RING finger) protein [Medicago truncatula]
c113297.graph_c0	22.9277	21.6339	7.47271	9.83657	0.00472671	-1.42637	down	--	--	--	--	--	--	--	Uncharacterized protein At1g76070 GN=At1g76070 OS=Arabidopsis thaliana (Mouse-ear cress) PE=1 SV=1	Syringolide-induced protein 14-1-1 [Medicago truncatula]
c113348.graph_c0	0.971724	0.85292	8.0973	4.90812	0.00213948	2.72455	up	--	--	--	--	--	--	--	--	knotted 1-binding protein [Medicago truncatula]
c113379.graph_c0	0.708865	0.610886	4.52114	4.65888	0.00439683	2.72418	up	--	--	--	--	--	--	--	--	hypothetical protein MTR_8g009260 [Medicago truncatula]
c113420.graph_c0	0.82872	0.394204	194.828	148.669	5.11e-52	8.06354	up	Molecular Function: polygalacturonase activity (GO:0004650);; Cellular Component: extracellular region (GO:0005576);; Biological Process: carbohydrate metabolic process (GO:0005975);;	[M]	Cell wall/membrane/envelope biogenesis	K01184|0|cam:101492624|polygalacturonase-like; K01184 polygalacturonase [EC:3.2.1.15] (A)	--	--	Glycosyl hydrolases family 28;; Pectate lyase superfamily protein	Polygalacturonase (Precursor) OS=Actinidia deliciosa (Kiwi) PE=2 SV=1	endo polygalacturonase [Medicago truncatula]
c113427.graph_c0	16.5967	9.853	1.89807	1.65271	4.12e-05	-2.96712	down	--	--	--	K14488|1.53802e-25|mtr:MTR_8g094980|Auxin-induced protein 6B; K14488 SAUR family protein (A)	--	--	Auxin responsive protein	Auxin-induced protein X10A OS=Glycine max (Soybean) PE=2 SV=1	Auxin-induced protein 6B [Medicago truncatula]
c113434.graph_c0	0	0.177387	13.5131	16.5414	2.51e-15	7.25601	up	--	--	--	--	--	--	--	--	--
c113437.graph_c0	13.2857	8.6773	1.05266	0.31775	2.44e-07	-4.13844	down	--	--	--	--	--	--	--	BON1-associated protein 2 GN=F4I18.26 OS=Arabidopsis thaliana (Mouse-ear cress) PE=1 SV=1	BON1-associated-like protein [Medicago truncatula]
c113457.graph_c0	2103.74	2782.91	638.604	943.182	0.00744567	-1.69593	down	--	--	--	--	--	--	Extensin-like protein repeat	--	--
c113490.graph_c0	0.0638433	0	1.18413	0.885817	3.24e-06	5.00213	up	Biological Process: cellular macromolecule metabolic process (GO:0044260);; Biological Process: nucleic acid metabolic process (GO:0090304);;	[L]	Replication, recombination and repair	--	[R]	General function prediction only	Chromo (CHRromatin Organisation MOdifier) domain;; Integrase core domain	--	PREDICTED: uncharacterized protein LOC100791656 [Glycine max]
c113509.graph_c0	1.50457	1.315	0.0387224	0.315589	0.00161612	-2.97109	down	Biological Process: chloroplast organization (GO:0009658);; Cellular Component: integral component of membrane (GO:0016021);; Cellular Component: viral envelope (GO:0019031);; Cellular Component: Tic complex (GO:0031897);; Biological Process: protein import into chloroplast stroma (GO:0045037);;	--	--	--	--	--	--	Protein TIC110, chloroplastic (Precursor) GN=TIC110 OS=Pisum sativum (Garden pea) PE=1 SV=1	PREDICTED: protein TIC110, chloroplastic-like [Cicer arietinum]
c113512.graph_c0	0	0	0.932608	1.2668	1.77e-06		up	--	--	--	--	--	--	--	--	--
c113532.graph_c0	0	0	6.09	3.86041	1.21e-12		up	Molecular Function: binding (GO:0005488);;	--	--	--	--	--	--	--	PREDICTED: enzymatic polyprotein-like [Cicer arietinum]
c113566.graph_c0	4.41571	2.18016	0.111278	0.0503844	4.2e-05	-5.45428	down	Biological Process: protein folding (GO:0006457);;	[R]	General function prediction only	K09571|2.5768e-140|cam:101500128|70 kDa peptidyl-prolyl isomerase-like; K09571 FK506-binding protein 4/5 [EC:5.2.1.8] (A)	[O]	Posttranslational modification, protein turnover, chaperones	TPR repeat;; Tetratricopeptide repeat;; FKBP-type peptidyl-prolyl cis-trans isomerase	Peptidyl-prolyl cis-trans isomerase FKBP65 GN=K15N18.12 OS=Arabidopsis thaliana (Mouse-ear cress) PE=1 SV=1	peptidyl-prolyl cis-trans isomerase FKBP62-like protein [Medicago truncatula]
c113571.graph_c0	2.68212	3.34544	0.256132	0.386572	0.000619588	-3.29432	down	--	--	--	--	--	--	--	--	hypothetical protein MTR_2g054400 [Medicago truncatula]
c113593.graph_c0	0	0	4.20481	3.80772	3.03e-09		up	--	--	--	--	--	--	--	--	Transcriptional factor B3 [Medicago truncatula]
c113637.graph_c0	2.04362	1.58607	0	0.176728	1.68e-05	-4.3079	down	--	--	--	--	--	--	No apical meristem (NAM) protein	NAC domain-containing protein 100 GN=NAC100 OS=Arabidopsis thaliana (Mouse-ear cress) PE=2 SV=1	NAC domain protein [Medicago truncatula]
c113715.graph_c0	46.9832	30.9953	22.0451	11.3094	0.00639933	-1.33275	down	--	--	--	--	--	--	--	--	PREDICTED: uncharacterized protein LOC101488248 [Cicer arietinum]
c113719.graph_c0	8.00894	8.19741	79.6367	47.3338	4.21e-08	2.85349	up	--	--	--	--	--	--	PLAT/LH2 domain;; Embryo-specific protein 3, (ATS3)	--	unknown [Medicago truncatula]
c113745.graph_c0	6.74043	4.78686	1.35889	0.950887	0.00747099	-2.41046	down	--	--	--	--	--	--	Cysteine-rich TM module stress tolerance	--	PREDICTED: CYSTM1 family protein A-like isoform X1 [Cicer arietinum]
c113750.graph_c0	2.40136	1.70997	0	0.185241	8.81e-06	-4.41632	down	--	--	--	--	--	--	--	--	--
c113775.graph_c0	0.037623	0.0198139	20.9799	16.4023	2.56e-40	9.27368	up	--	[R]	General function prediction only	--	--	--	O-methyltransferase	Caffeoyl-CoA O-methyltransferase 2 GN=CCOAOMT2 OS=Eucalyptus globulus (Blue gum) PE=2 SV=1	PREDICTED: uncharacterized protein LOC101510204 [Cicer arietinum]
c113777.graph_c0	0	0	1.96007	1.7195	4.23e-08		up	Molecular Function: ligase activity (GO:0016874);; Molecular Function: Photinus-luciferin 4-monooxygenase (ATP-hydrolyzing) activity (GO:0047077);; Biological Process: oxidation-reduction process (GO:0055114);;	--	--	K01904|4.71377e-64|pvu:PHAVU_011G084300g|hypothetical protein; K01904 4-coumarate--CoA ligase [EC:6.2.1.12] (A)	[I]	Lipid transport and metabolism	AMP-binding enzyme	4-coumarate--CoA ligase-like 7 GN=4CLL7 OS=Arabidopsis thaliana (Mouse-ear cress) PE=1 SV=1	4-coumarate:CoA ligase-like protein [Medicago truncatula]
c113790.graph_c0	19.4825	14.5897	3.99479	0.260254	1.56e-10	-3.19011	down	Molecular Function: kinase activity (GO:0016301);; Biological Process: phosphorylation (GO:0016310);;	[DZ]	--	--	[S]	Function unknown	Regulator of chromosome condensation (RCC1) repeat;; Regulator of chromosome condensation (RCC1) repeat	Ultraviolet-B receptor UVR8 GN=UVR8 OS=Arabidopsis thaliana (Mouse-ear cress) PE=1 SV=1	PREDICTED: ultraviolet-B receptor UVR8-like [Cicer arietinum]
c113806.graph_c0	14.3557	12.6364	0.274328	3.62694	3.03e-08	-2.76012	down	Molecular Function: ATP binding (GO:0005524);; Biological Process: protein folding (GO:0006457);; Biological Process: heat acclimation (GO:0010286);;	[O]	Posttranslational modification, protein turnover, chaperones	K09489|0|cam:101509245|heat shock 70 kDa protein 8-like; K09489 heat shock 70kDa protein 4 (A)	[O]	Posttranslational modification, protein turnover, chaperones	Hsp70 protein	Heat shock 70 kDa protein 8 GN=F22D22.13 OS=Arabidopsis thaliana (Mouse-ear cress) PE=1 SV=1	PREDICTED: heat shock 70 kDa protein 8-like isoform X1 [Cicer arietinum]
c113893.graph_c0	2.08035	1.55423	20.2778	23.6888	2.22e-10	3.53636	up	Molecular Function: aldehyde dehydrogenase [NAD(P)+] activity (GO:0004030);; Biological Process: cellular aldehyde metabolic process (GO:0006081);; Biological Process: oxidation-reduction process (GO:0055114);;	[C]	Energy production and conversion	K00128|0|cam:101491914|aldehyde dehydrogenase family 3 member F1-like; K00128 aldehyde dehydrogenase (NAD+) [EC:1.2.1.3] (A)	[C]	Energy production and conversion	Aldehyde dehydrogenase family	Aldehyde dehydrogenase family 3 member F1 GN=ALDH3F1 OS=Arabidopsis thaliana (Mouse-ear cress) PE=2 SV=2	PREDICTED: aldehyde dehydrogenase family 3 member F1-like [Cicer arietinum]
c113916.graph_c0	40.1769	24.622	4.94263	4.85058	1.3e-06	-2.78966	down	Biological Process: regulation of transcription, DNA-templated (GO:0006355);;	--	--	--	--	--	GRAS domain family	Chitin-inducible gibberellin-responsive protein 1 GN=P0006G05.102 OS=Oryza sativa subsp. japonica (Rice) PE=2 SV=1	GRAS family transcription factor [Medicago truncatula]
c113969.graph_c0	3.77074	2.76943	0.345168	0.156286	3.84e-06	-3.82431	down	Cellular Component: exocyst (GO:0000145);; Biological Process: exocytosis (GO:0006887);;	--	--	K07195|0|mtr:MTR_2g096230|Exocyst complex component; K07195 exocyst complex component 7 (A)	[U]	Intracellular trafficking, secretion, and vesicular transport	Exo70 exocyst complex subunit	Exocyst complex component EXO70A1 GN=EXO70A1 OS=Arabidopsis thaliana (Mouse-ear cress) PE=1 SV=1	Exocyst complex component [Medicago truncatula]
c113971.graph_c0	41.7259	29.7462	10.6177	9.01111	2.44e-05	-1.94337	down	--	--	--	--	--	--	Plastocyanin-like domain	Umecyanin OS=Armoracia rusticana (Horseradish) PE=1 SV=1	hypothetical protein PHAVU_003G166800g [Phaseolus vulgaris]
c113990.graph_c0	0.0375068	0	1.7467	1.91042	1.24e-08	6.61522	up	--	--	--	--	[R]	General function prediction only	Reverse transcriptase (RNA-dependent DNA polymerase)	Putative ribonuclease H protein At1g65750 GN=At1g65750 OS=Arabidopsis thaliana (Mouse-ear cress) PE=3 SV=1	LINE-1 reverse transcriptase like, partial [Glycine soja]
c113995.graph_c0	14.4639	13.4947	6.64514	4.01873	0.00283815	-1.50207	down	Biological Process: respiratory burst involved in defense response (GO:0002679);; Biological Process: response to wounding (GO:0009611);; Biological Process: response to mechanical stimulus (GO:0009612);; Biological Process: ethylene biosynthetic process (GO:0009693);; Biological Process: response to chitin (GO:0010200);; Biological Process: endoplasmic reticulum unfolded protein response (GO:003…	--	--	--	--	--	Protein of unknown function (DUF506);; Protein of unknown function (DUF506)	--	hypothetical protein MTR_7g083080 [Medicago truncatula]
c114013.graph_c0	0.0661171	0.0348202	8.11762	6.95267	1.78e-13	7.15553	up	--	--	--	--	[O]	Posttranslational modification, protein turnover, chaperones	Hsp20/alpha crystallin family	--	--
c114031.graph_c0	9.31886	13.5824	1.21862	3.31062	0.00731043	-2.37665	down	Molecular Function: copper ion binding (GO:0005507);; Molecular Function: electron carrier activity (GO:0009055);;	--	--	--	--	--	Plastocyanin-like domain	Blue copper protein (Precursor) OS=Pisum sativum (Garden pea) PE=2 SV=1	plastocyanin-like domain protein [Medicago truncatula]
c114112.graph_c0	4.75188	3.79697	0.118923	1.00513	0.000553861	-2.90124	down	Molecular Function: ubiquitin-protein ligase activity (GO:0004842);; Biological Process: protein ubiquitination (GO:0016567);;	--	--	K10592|5.77018e-116|cam:101491777|E3 ubiquitin-protein ligase UPL1-like; K10592 E3 ubiquitin-protein ligase HUWE1 [EC:6.3.2.19] (A)	[OK]	--	Domain of Unknown Function (DUF908)	E3 ubiquitin-protein ligase UPL1 GN=UPL1 OS=Arabidopsis thaliana (Mouse-ear cress) PE=1 SV=3	PREDICTED: E3 ubiquitin-protein ligase UPL1-like isoform X1 [Cicer arietinum]
c114113.graph_c0	273.993	294.627	75.5488	51.3965	8.74e-08	-2.27316	down	--	--	--	--	--	--	Probable lipid transfer	Probable non-specific lipid-transfer protein AKCS9 (Precursor) OS=Vigna unguiculata (Cowpea) PE=2 SV=1	Non-specific lipid-transfer protein [Medicago truncatula]
c114116.graph_c0	2.98433	2.28608	0	0.653797	0.00159093	-2.95812	down	--	--	--	--	--	--	--	--	--
c114131.graph_c0	9.25405	13.316	1.01362	0.478901	3.22e-06	-4.06248	down	--	--	--	--	--	--	Viral movement protein (MP)	--	viral movement protein [Medicago truncatula]
c114136.graph_c0	3.64987	7.25277	27.8097	16.1981	0.0016596	1.86966	up	Biological Process: abscisic acid-activated signaling pathway (GO:0009738);;	--	--	K14496|3.59563e-91|mtr:MTR_4g014460|Abscisic acid receptor PYL4; K14496 abscisic acid receptor PYR/PYL family (A)	--	--	Polyketide cyclase / dehydrase and lipid transport;; Pathogenesis-related protein Bet v I family	Abscisic acid receptor PYL4 GN=T19C21.20 OS=Arabidopsis thaliana (Mouse-ear cress) PE=1 SV=1	Abscisic acid receptor PYL4 [Medicago truncatula]
c114142.graph_c0	2.67515	2.68191	12.7487	12.2861	0.000286457	2.13985	up	Cellular Component: chloroplast envelope (GO:0009941);;	[S]	Function unknown	--	--	--	Uncharacterized protein family, UPF0114	--	PREDICTED: uncharacterized protein LOC101492946 [Cicer arietinum]
c114154.graph_c0	22.9684	17.7373	90.3755	50.9022	0.00281086	1.68702	up	--	--	--	--	--	--	Protein of unknown function (DUF1070)	--	unknown [Medicago truncatula]
c114193.graph_c0	1.33876	1.59811	0.323878	0.146646	0.00377188	-2.78086	down	--	--	--	--	--	--	--	--	--
c114195.graph_c0	5.65379	5.95506	1.42478	0.645112	0.00177693	-2.62145	down	--	--	--	--	--	--	--	--	hypothetical protein MTR_5g026390 [Medicago truncatula]
c114293.graph_c0	15.0104	9.73913	0.689961	1.87441	1.2e-08	-3.27665	down	Molecular Function: protein serine/threonine kinase activity (GO:0004674);; Molecular Function: ATP binding (GO:0005524);; Biological Process: protein phosphorylation (GO:0006468);;	[RTKL]	--	--	[T]	Signal transduction mechanisms	Protein kinase domain;; Protein tyrosine kinase	Mitogen-activated protein kinase kinase kinase 2 GN=ANP2 OS=Arabidopsis thaliana (Mouse-ear cress) PE=2 SV=1	PREDICTED: protein kinase byr2-like [Cicer arietinum]
c114328.graph_c0	114.828	106.063	27.9774	17.5147	3.04e-08	-2.38859	down	--	--	--	--	--	--	--	--	hypothetical protein MTR_3g093400 [Medicago truncatula]
c114349.graph_c0	0	0	1.39165	1.21355	5.49e-08		up	--	--	--	--	[L]	Replication, recombination and repair	--	Putative AC transposase OS=Zea mays (Maize) PE=2 SV=2	Oligoribonuclease [Medicago truncatula]
c114405.graph_c0	2.19274	2.27511	9.06558	8.13774	0.00933423	1.85445	up	Biological Process: carbohydrate metabolic process (GO:0005975);; Molecular Function: glucan endo-1,3-beta-D-glucosidase activity (GO:0042973);;	--	--	--	--	--	Glycosyl hydrolases family 17	Glucan endo-1,3-beta-glucosidase, acidic isoform GI9 (Precursor) GN=PR2 OS=Nicotiana tabacum (Common tobacco) PE=1 SV=1	glucan endo-1,3-beta-glucosidase-like precursor [Cicer arietinum]
c114431.graph_c0	32.156	15.8575	3.40699	4.26057	0.00805145	-2.68632	down	--	--	--	--	--	--	WRKY DNA -binding domain;; Plant zinc cluster domain	Probable WRKY transcription factor 11 GN=WRKY11 OS=Arabidopsis thaliana (Mouse-ear cress) PE=2 SV=2	PREDICTED: probable WRKY transcription factor 17-like [Cicer arietinum]
c114432.graph_c0	4.70843	3.65187	0.0517764	0	2.53e-09	-7.5426	down	--	--	--	--	--	--	--	--	--
c114436.graph_c1	2.25969	1.53652	0.0345996	0.15666	1.18e-05	-4.29697	down	Molecular Function: transferase activity, transferring phosphorus-containing groups (GO:0016772);; Biological Process: cellular metabolic process (GO:0044237);; Molecular Function: organic cyclic compound binding (GO:0097159);; Molecular Function: heterocyclic compound binding (GO:1901363);;	--	--	--	[R]	General function prediction only	Reverse transcriptase (RNA-dependent DNA polymerase);; Reverse transcriptase (RNA-dependent DNA polymerase)	Uncharacterized mitochondrial protein AtMg01250 GN=AtMg01250 OS=Arabidopsis thaliana (Mouse-ear cress) PE=4 SV=1	LINE-1 reverse transcriptase like, partial [Glycine soja]
c114546.graph_c0	20.1754	18.1419	8.25189	3.6038	0.00201592	-1.82187	down	Molecular Function: N-acetyltransferase activity (GO:0008080);;	[J]	Translation, ribosomal structure and biogenesis	--	--	--	Acetyltransferase (GNAT) domain;; Acetyltransferase (GNAT) domain;; Acetyltransferase (GNAT) domain;; Acetyltransferase (GNAT) family	--	PREDICTED: uncharacterized N-acetyltransferase p20-like [Cicer arietinum]
c114569.graph_c0	0.0446723	0.141158	18.9128	10.0313	5.48e-12	7.11894	up	--	--	--	--	--	--	--	--	--
c114617.graph_c0	1.45253	0.939063	0.0121173	0.219459	0.000113182	-3.32125	down	Molecular Function: catalytic activity (GO:0003824);;	--	--	--	[R]	General function prediction only	Reverse transcriptase (RNA-dependent DNA polymerase);; zinc-binding in reverse transcriptase;; Reverse transcriptase-like	Putative ribonuclease H protein At1g65750 GN=At1g65750 OS=Arabidopsis thaliana (Mouse-ear cress) PE=3 SV=1	PREDICTED: uncharacterized protein LOC103420255 [Malus domestica]
c114624.graph_c0	0.0649181	0	5.81093	6.32881	3.86e-09	7.55443	up	--	--	--	--	[T]	Signal transduction mechanisms	Oxysterol-binding protein	Oxysterol-binding protein-related protein 4C GN=ORP4C OS=Arabidopsis thaliana (Mouse-ear cress) PE=2 SV=1	Oxysterol-binding protein-related protein [Medicago truncatula]
c114625.graph_c0	40.9125	33.6686	101.058	86.0697	0.00912748	1.24261	up	Cellular Component: nucleus (GO:0005634);; Biological Process: regulation of transcription, DNA-templated (GO:0006355);; Biological Process: auxin-activated signaling pathway (GO:0009734);; Molecular Function: protein dimerization activity (GO:0046983);;	--	--	K14484|2.47775e-119|cam:101503373|auxin-induced protein AUX28-like; K14484 auxin-responsive protein IAA (A)	--	--	AUX/IAA family	Auxin-induced protein AUX28 GN=AUX28 OS=Glycine max (Soybean) PE=2 SV=1	unknown [Medicago truncatula]
c114663.graph_c0	0	0	3.13184	3.75363	2.5e-08		up	--	--	--	--	--	--	--	--	--
c114670.graph_c0	11.1998	4.18108	98.9481	74.385	1.44e-10	3.43155	up	--	--	--	--	--	--	--	--	--
c114680.graph_c0	0	0.0346583	18.1499	16.3638	2.45e-28	9.7915	up	--	--	--	--	--	--	--	--	--
c114699.graph_c0	60.8768	51.4846	16.1113	14.3978	3.91e-06	-1.96336	down	Biological Process: transmembrane transport (GO:0055085);;	--	--	--	[T]	Signal transduction mechanisms	OPT oligopeptide transporter protein	Oligopeptide transporter 6 GN=OPT6 OS=Arabidopsis thaliana (Mouse-ear cress) PE=2 SV=1	PREDICTED: oligopeptide transporter 6-like [Cicer arietinum]
c114702.graph_c0	83.0667	79.8224	21.564	7.60327	9.15e-10	-2.62531	down	Molecular Function: ATP binding (GO:0005524);; Cellular Component: cell wall (GO:0005618);; Cellular Component: cytosol (GO:0005829);; Cellular Component: plasma membrane (GO:0005886);; Biological Process: protein folding (GO:0006457);; Cellular Component: chloroplast (GO:0009507);; Biological Process: response to high light intensity (GO:0009644);; Biological Process: heat acclimation (GO:001028…	[O]	Posttranslational modification, protein turnover, chaperones	K03283|9.09644e-145|pvu:PHAVU_003G154800g|hypothetical protein; K03283 heat shock 70kDa protein 1/8 (A)	[O]	Posttranslational modification, protein turnover, chaperones	Hsp70 protein	Heat shock 70 kDa protein GN=HSP70 OS=Glycine max (Soybean) PE=1 SV=1	PsHSP71.2 [Pisum sativum]
c114721.graph_c0	155.085	150.19	66.2657	37.5457	0.000240906	-1.67321	down	Molecular Function: transferase activity, transferring phosphorus-containing groups (GO:0016772);;	[R]	General function prediction only	--	[R]	General function prediction only	ABC1 family	Uncharacterized aarF domain-containing protein kinase At1g79600, chloroplastic (Precursor) GN=At1g79600 OS=Arabidopsis thaliana (Mouse-ear cress) PE=2 SV=1	PREDICTED: uncharacterized protein sll1770-like isoform X1 [Cicer arietinum]
c114721.graph_c1	122.332	149.033	40.3406	23.179	1.52e-06	-2.22049	down	Molecular Function: transferase activity, transferring phosphorus-containing groups (GO:0016772);;	[R]	General function prediction only	--	[R]	General function prediction only	ABC1 family	Uncharacterized aarF domain-containing protein kinase At1g71810, chloroplastic (Precursor) GN=At1g71810 OS=Arabidopsis thaliana (Mouse-ear cress) PE=2 SV=1	PREDICTED: uncharacterized protein sll1770-like isoform X1 [Cicer arietinum]
c114776.graph_c0	0.346533	0.79083	9.39645	6.19991	2.01e-07	3.63701	up	--	[I]	Lipid transport and metabolism	K10256|0|cam:101489419|omega-6 fatty acid desaturase, endoplasmic reticulum isozyme 2-like; K10256 omega-6 fatty acid desaturase (delta-12 desaturase) [EC:1.14.19.-] (A)	--	--	Fatty acid desaturase;; Domain of unknown function (DUF3474)	Omega-6 fatty acid desaturase, endoplasmic reticulum isozyme 2 GN=FAD2-2 OS=Glycine max (Soybean) PE=2 SV=1	microsomal omega-3 fatty acid desaturase [Medicago truncatula]
c114814.graph_c0	9.66755	3.89148	0.223453	0.202351	0.00355477	-5.04621	down	--	--	--	--	--	--	--	--	--
c114862.graph_c0	1.34341	1.5282	0.0325003	0.058862	2.55e-06	-5.02452	down	Molecular Function: protein dimerization activity (GO:0046983);;	--	--	--	--	--	Helix-loop-helix DNA-binding domain	Transcription factor bHLH89 GN=F9P14.3 OS=Arabidopsis thaliana (Mouse-ear cress) PE=2 SV=1	Transcription factor bHLH91 [Medicago truncatula]
c114882.graph_c0	0.159408	0.251853	2.6031	1.17863	0.00865051	3.05095	up	--	--	--	--	--	--	--	--	--
c114913.graph_c0	0.106426	0	6.43673	3.14758	7.38e-06	6.4496	up	--	--	--	--	--	--	--	--	--
c114932.graph_c0	4.06446	5.42036	0.436137	0.753993	0.000238781	-3.05401	down	Biological Process: metabolic process (GO:0008152);;	[R]	General function prediction only	--	[I]	Lipid transport and metabolism	Patatin-like phospholipase	Patatin-like protein 2 GN=PLP2 OS=Arabidopsis thaliana (Mouse-ear cress) PE=1 SV=1	Patatin-like protein [Medicago truncatula]
c114934.graph_c0	0.0258828	0.109048	1.94112	3.60065	0.002823	5.26679	up	Molecular Function: monooxygenase activity (GO:0004497);; Molecular Function: iron ion binding (GO:0005506);; Biological Process: iron ion transport (GO:0006826);; Molecular Function: electron carrier activity (GO:0009055);; Biological Process: cellular response to iron ion starvation (GO:0010106);; Biological Process: response to nitrate (GO:0010167);; Biological Process: nitrate transport (GO:0…	[Q]	Secondary metabolites biosynthesis, transport and catabolism	--	[QI]	--	Cytochrome P450	Cytochrome P450 87A3 GN=OSJNBa0088I22.16 OS=Oryza sativa subsp. japonica (Rice) PE=2 SV=3	Cytochrome P450 [Medicago truncatula]
c114959.graph_c0	0.134941	0	7.34522	4.28656	2.46e-07	6.39713	up	--	--	--	--	--	--	--	--	--
c114971.graph_c0	0	0	1.4258	2.91912	0.00341657		up	--	--	--	--	--	--	--	--	--
c114980.graph_c0	7.73656	3.70023	0.143239	0.605322	0.00103936	-3.90852	down	Molecular Function: protein dimerization activity (GO:0046983);;	--	--	--	--	--	Helix-loop-helix DNA-binding domain	--	Transcription factor bHLH36 [Medicago truncatula]
c114994.graph_c0	10.6109	8.29923	2.16037	2.24404	0.00581763	-2.17173	down	Molecular Function: kinase activity (GO:0016301);;	[RTKL]	--	--	[T]	Signal transduction mechanisms	Protein kinase domain;; Protein tyrosine kinase	Probable serine/threonine-protein kinase At1g18390 (Precursor) GN=At1g18390 OS=Arabidopsis thaliana (Mouse-ear cress) PE=2 SV=2	Tyrosine-protein kinase ABL [Medicago truncatula]
c115003.graph_c0	0.215213	0.272017	2.0826	1.32015	0.00421957	2.68313	up	Molecular Function: DNA binding (GO:0003677);; Molecular Function: sequence-specific DNA binding transcription factor activity (GO:0003700);; Biological Process: trehalose biosynthetic process (GO:0005992);; Biological Process: regulation of transcription, DNA-templated (GO:0006355);; Biological Process: proline biosynthetic process (GO:0006561);; Biological Process: systemic acquired resistance …	--	--	--	--	--	No apical meristem (NAM) protein	Transcription factor JUNGBRUNNEN 1 GN=F23E6.1 OS=Arabidopsis thaliana (Mouse-ear cress) PE=1 SV=1	NAC domain protein IPR003441 [Medicago truncatula]
c115006.graph_c0	0	0.212316	10.6066	7.17607	1.2e-10	6.20136	up	--	--	--	--	--	--	--	--	F-box protein interaction domain protein [Medicago truncatula]
c115047.graph_c0	2.38414	1.36974	0	0.158276	7.74e-06	-4.50361	down	Molecular Function: oxidoreductase activity, acting on paired donors, with incorporation or reduction of molecular oxygen, 2-oxoglutarate as one donor, and incorporation of one atom each of oxygen into both donors (GO:0016706);; Biological Process: oxidation-reduction process (GO:0055114);;	[R]	General function prediction only	K05278|0|cam:101504604|flavonol synthase/flavanone 3-hydroxylase-like; K05278 flavonol synthase [EC:1.14.11.23] (A)	[QR]	--	non-haem dioxygenase in morphine synthesis N-terminal;; 2OG-Fe(II) oxygenase superfamily	Flavonol synthase/flavanone 3-hydroxylase GN=FLS OS=Citrus unshiu (Satsuma mandarin) PE=1 SV=1	PREDICTED: flavonol synthase/flavanone 3-hydroxylase-like [Cicer arietinum]
c115157.graph_c0	26.0266	25.6334	86.9237	82.047	0.000325704	1.62446	up	Molecular Function: peroxidase activity (GO:0004601);; Biological Process: polyamine catabolic process (GO:0006598);; Biological Process: response to oxidative stress (GO:0006979);; Biological Process: phenylpropanoid metabolic process (GO:0009698);; Biological Process: response to nitrate (GO:0010167);; Biological Process: nitrate transport (GO:0015706);; Molecular Function: heme binding (GO:002…	--	--	K00430|0|mtr:MTR_7g035030|Peroxidase; K00430 peroxidase [EC:1.11.1.7] (A)	--	--	Peroxidase	Peroxidase 47 (Precursor) GN=F17M5.180 OS=Arabidopsis thaliana (Mouse-ear cress) PE=2 SV=2	Peroxidase [Medicago truncatula]
c115212.graph_c0	7.47871	8.65786	3.62671	1.10704	0.00933423	-1.92799	down	--	[G]	Carbohydrate transport and metabolism	K00850|0|mtr:MTR_091s0008|6-phosphofructokinase; K00850 6-phosphofructokinase 1 [EC:2.7.1.11] (A)	[G]	Carbohydrate transport and metabolism	Phosphofructokinase;; ATP-NAD kinase	ATP-dependent 6-phosphofructokinase 2 {ECO:0000255|HAMAP-Rule:MF_03186} GN=At5g47810 OS=Arabidopsis thaliana (Mouse-ear cress) PE=1 SV=1	6-phosphofructokinase [Medicago truncatula]
c115304.graph_c0	26.9962	27.6772	6.72824	3.88681	1.27e-06	-2.48293	down	Biological Process: protein folding (GO:0006457);; Cellular Component: chloroplast (GO:0009507);; Biological Process: heat acclimation (GO:0010286);;	--	--	K13993|1.53722e-98|mtr:MTR_3g092460|Chloroplast small heat shock protein; K13993 HSP20 family protein (A)	[O]	Posttranslational modification, protein turnover, chaperones	Hsp20/alpha crystallin family	Small heat shock protein, chloroplastic (Precursor) GN=HSP21 OS=Pisum sativum (Garden pea) PE=2 SV=1	RecName: Full=Small heat shock protein, chloroplastic; Flags: Precursor [Pisum sativum]
c115393.graph_c0	3.71444	2.68975	0	0.254296	3.99e-06	-4.59929	down	--	--	--	--	--	--	--	--	--
c115410.graph_c0	0	0.160994	9.52177	4.1857	3.58e-05	6.19894	up	--	--	--	--	--	--	--	--	--
c115418.graph_c0	4.41196	2.21019	0	0	4.94e-08		down	Cellular Component: membrane (GO:0016020);; Molecular Function: transferase activity, transferring hexosyl groups (GO:0016758);;	--	--	--	[G]	Carbohydrate transport and metabolism	--	Probable beta-1,3-galactosyltransferase 3 GN=B3GALT3 OS=Arabidopsis thaliana (Mouse-ear cress) PE=2 SV=1	hypothetical protein MTR_2g088270 [Medicago truncatula]
c115477.graph_c0	0.222893	0	5.06877	3.56464	3.53e-07	5.25477	up	Molecular Function: protein dimerization activity (GO:0046983);;	--	--	--	--	--	Helix-loop-helix DNA-binding domain	Transcription factor bHLH93 GN=K21L13.16 OS=Arabidopsis thaliana (Mouse-ear cress) PE=1 SV=1	Transcription factor bHLH93 [Medicago truncatula]
c115480.graph_c0	0	0	5.77659	3.53097	3.54e-08		up	--	--	--	--	--	--	--	--	--
c115492.graph_c0	6.235	6.23556	0.152363	1.31075	3.49e-05	-3.07438	down	--	--	--	--	--	--	EamA-like transporter family	WAT1-related protein At1g25270 GN=At1g25270 OS=Arabidopsis thaliana (Mouse-ear cress) PE=2 SV=1	auxin-induced 5NG4-like protein [Medicago truncatula]
c115504.graph_c0	3.73135	4.82987	17.8365	12.705	0.00670584	1.72043	up	Biological Process: flavonoid biosynthetic process (GO:0009813);; Molecular Function: chalcone isomerase activity (GO:0045430);;	--	--	K01859|6.16755e-137|mtr:MTR_1g115820|Chalcone-flavonone isomerase; K01859 chalcone isomerase [EC:5.5.1.6] (A)	--	--	Chalcone-flavanone isomerase	Chalcone--flavonone isomerase 1 GN=CHI1 OS=Medicago sativa (Alfalfa) PE=1 SV=1	Chalcone-flavonone isomerase [Medicago truncatula]
c115510.graph_c0	12.9455	14.0375	3.40051	3.95376	0.000779636	-1.95106	down	--	--	--	--	[F]	Nucleotide transport and metabolism	ENTH domain	Clathrin interactor EPSIN 3 GN=F25L23.150 OS=Arabidopsis thaliana (Mouse-ear cress) PE=2 SV=1	ENTH/VHS family protein [Medicago truncatula]
c115517.graph_c0	5.4392	2.42581	0.237094	0.268379	0.00426652	-4.00218	down	Biological Process: transcription, DNA-templated (GO:0006351);;	--	--	--	--	--	AP2 domain	Dehydration-responsive element-binding protein 1D GN=MSG15.7 OS=Arabidopsis thaliana (Mouse-ear cress) PE=2 SV=1	dehydration-responsive element-binding protein [Medicago truncatula]
c115549.graph_c0	0.0744158	0	2.07034	2.85299	8.96e-06	6.07035	up	--	--	--	--	--	--	--	--	--
c115561.graph_c0	32.9035	23.7509	9.74144	7.8133	0.000423023	-1.77345	down	Biological Process: response to abiotic stimulus (GO:0009628);; Biological Process: post-embryonic development (GO:0009791);; Molecular Function: transferase activity (GO:0016740);; Biological Process: response to chemical (GO:0042221);;	[O]	Posttranslational modification, protein turnover, chaperones	K00799|1.27428e-107|mtr:MTR_5g037380|hypothetical protein; K00799 glutathione S-transferase [EC:2.5.1.18] (A)	[O]	Posttranslational modification, protein turnover, chaperones	Glutathione S-transferase, N-terminal domain;; Glutathione S-transferase, C-terminal domain;; Glutathione S-transferase, N-terminal domain;; Glutathione S-transferase, N-terminal domain	Glutathione S-transferase U18 GN=F14N23.24 OS=Arabidopsis thaliana (Mouse-ear cress) PE=2 SV=1	unknown [Medicago truncatula]
c115583.graph_c0	0.201912	0.0425342	5.32435	2.78675	6.28e-07	4.98338	up	--	--	--	--	--	--	--	FBD-associated F-box protein At4g10400 GN=At4g10400 OS=Arabidopsis thaliana (Mouse-ear cress) PE=2 SV=2	F-box/RNI/FBD-like domain protein [Medicago truncatula]
c115653.graph_c0	6.90742	5.94743	24.2703	19.9366	0.00484077	1.69324	up	Molecular Function: endoribonuclease activity (GO:0004521);; Cellular Component: mitochondrion (GO:0005739);; Cellular Component: vacuole (GO:0005773);; Biological Process: gluconeogenesis (GO:0006094);; Biological Process: glycolysis (GO:0006096);; Cellular Component: chloroplast stroma (GO:0009570);; Cellular Component: thylakoid (GO:0009579);; Biological Process: response to salt stress (GO:00…	[J]	Translation, ribosomal structure and biogenesis	--	[J]	Translation, ribosomal structure and biogenesis	Endoribonuclease L-PSP	Reactive Intermediate Deaminase A, chloroplastic {ECO:0000303|PubMed:25070638} (Precursor) OS=Arabidopsis thaliana (Mouse-ear cress) PE=1 SV=1	unknown [Medicago truncatula]
c115682.graph_c0	37.9938	23.3102	12.4158	11.2877	0.00479579	-1.43944	down	Molecular Function: beta-1,4-mannosylglycoprotein 4-beta-N-acetylglucosaminyltransferase activity (GO:0003830);; Biological Process: protein N-linked glycosylation (GO:0006487);; Cellular Component: membrane (GO:0016020);;	--	--	K00737|0|pvu:PHAVU_002G260100g|hypothetical protein; K00737 beta-1,4-mannosyl-glycoprotein beta-1,4-N-acetylglucosaminyltransferase [EC:2.4.1.144] (A)	--	--	Glycosyltransferase family 17	--	beta-1,4-N-acetylglucosaminyltransferase-like protein [Medicago truncatula]
c115732.graph_c0	7.70262	3.14915	0.183893	0.111017	0.0021462	-5.28128	down	--	--	--	K09286|2.28662e-87|mtr:MTR_5g010940|Dehydration-responsive element-binding protein 1F; K09286 EREBP-like factor (A)	--	--	AP2 domain	Dehydration-responsive element-binding protein 1E OS=Arabidopsis thaliana (Mouse-ear cress) PE=2 SV=1	Dehydration-responsive element-binding protein 1F [Medicago truncatula]
c115789.graph_c0	0.0417314	0	9.69199	3.4284	0.000328997	8.23525	up	--	--	--	--	--	--	--	--	--
c115801.graph_c0	99.2219	98.5471	31.3727	39.4984	0.000474263	-1.54756	down	Cellular Component: cytoplasm (GO:0005737);; Biological Process: cellular protein modification process (GO:0006464);; Biological Process: response to heat (GO:0009408);; Molecular Function: isomerase activity (GO:0016853);; Biological Process: cellular response to stress (GO:0033554);; Molecular Function: phosphatidylinositol phosphate binding (GO:1901981);;	--	--	K09571|1.20105e-116|cam:101514965|peptidyl-prolyl cis-trans isomerase FKBP62-like; K09571 FK506-binding protein 4/5 [EC:5.2.1.8] (A)	[O]	Posttranslational modification, protein turnover, chaperones	FKBP-type peptidyl-prolyl cis-trans isomerase	Peptidyl-prolyl cis-trans isomerase FKBP62 GN=MJL12.19 OS=Arabidopsis thaliana (Mouse-ear cress) PE=1 SV=2	PREDICTED: peptidyl-prolyl cis-trans isomerase FKBP62-like [Cicer arietinum]
c115811.graph_c0	2.42923	2.73718	0.136672	0.0618822	5.32e-06	-4.83815	down	--	--	--	--	--	--	--	--	--
c115816.graph_c0	0	0	2.0504	1.25047	2.04e-08		up	Biological Process: macromolecule metabolic process (GO:0043170);; Biological Process: primary metabolic process (GO:0044238);;	--	--	--	--	--	--	--	PREDICTED: uncharacterized protein LOC102665989 [Glycine max]
c115918.graph_c0	3.15665	1.87442	14.6327	13.7614	1.15e-06	2.43157	up	Molecular Function: beta-galactosidase activity (GO:0004565);; Biological Process: carbohydrate metabolic process (GO:0005975);; Cellular Component: plant-type cell wall (GO:0009505);; Cellular Component: plasmodesma (GO:0009506);; Molecular Function: carbohydrate binding (GO:0030246);; Biological Process: regulation of protein localization (GO:0032880);; Biological Process: hydrogen peroxide cat…	--	--	--	[G]	Carbohydrate transport and metabolism	Galactose binding lectin domain;; Glycosyl hydrolases family 35;; Beta-galactosidase jelly roll domain;; Glycosyl hydrolases family 2, sugar binding domain	Beta-galactosidase 1 (Precursor) GN=BGAL1 OS=Arabidopsis thaliana (Mouse-ear cress) PE=1 SV=1	beta-galactosidase [Medicago truncatula]
c115922.graph_c0	0.137137	0	5.30827	7.06023	3.32e-07	6.51516	up	--	--	--	--	--	--	--	--	hypothetical protein MTR_3g028060 [Medicago truncatula]
c115933.graph_c0	5.33679	3.26286	0	0	4.37e-12		down	--	--	--	--	--	--	--	--	replication factor-A carboxy-terminal domain protein [Medicago truncatula]
c115943.graph_c0	2.03348	2.95008	0.510511	0.252163	0.00334949	-2.84963	down	--	--	--	--	--	--	--	--	--
c115964.graph_c0	8.15883	4.65663	22.7037	27.1634	0.000585044	1.91217	up	Molecular Function: superoxide dismutase activity (GO:0004784);; Cellular Component: extracellular region (GO:0005576);; Molecular Function: manganese ion binding (GO:0030145);; Molecular Function: nutrient reservoir activity (GO:0045735);; Biological Process: oxidation-reduction process (GO:0055114);;	[GR]	--	--	--	--	Cupin;; Cupin domain	Germin-like protein 5-1 (Precursor) OS=Oryza sativa subsp. japonica (Rice) PE=2 SV=1	PREDICTED: rhicadhesin receptor-like [Cicer arietinum]
c115967.graph_c0	67.7386	64.243	26.9564	28.985	0.00484077	-1.31357	down	Cellular Component: integral component of membrane (GO:0016021);;	--	--	--	--	--	Tetraspanin family	Tetraspanin-19 GN=TOM2AH3 OS=Arabidopsis thaliana (Mouse-ear cress) PE=2 SV=1	PREDICTED: tetraspanin-19-like [Cicer arietinum]
c115984.graph_c0	50.0946	49.8435	8.04957	5.872	1.31e-05	-2.94599	down	Molecular Function: ATP binding (GO:0005524);; Biological Process: response to stress (GO:0006950);;	[O]	Posttranslational modification, protein turnover, chaperones	K03283|8.34181e-45|mus:103995448|probable mediator of RNA polymerase II transcription subunit 37c; K03283 heat shock 70kDa protein 1/8 (A)	[O]	Posttranslational modification, protein turnover, chaperones	NAD-specific glutamate dehydrogenase;; Hsp70 protein	Heat shock cognate 70 kDa protein 2 GN=HSC-2 OS=Solanum lycopersicum (Tomato) PE=1 SV=1	heat shock protein 70, partial [Nicotiana attenuata]
c115984.graph_c1	134.723	148.161	32.1411	10.0606	1.32e-11	-2.90023	down	Molecular Function: ATP binding (GO:0005524);; Biological Process: response to stress (GO:0006950);;	[O]	Posttranslational modification, protein turnover, chaperones	K03283|2.45788e-104|cam:101501931|heat shock cognate 70 kDa protein 2-like; K03283 heat shock 70kDa protein 1/8 (A)	[O]	Posttranslational modification, protein turnover, chaperones	NAD-specific glutamate dehydrogenase;; Hsp70 protein	Heat shock cognate 70 kDa protein 2 GN=HSC-2 OS=Solanum lycopersicum (Tomato) PE=1 SV=1	70 kD heatshockprotein [Medicago sativa]
c115986.graph_c0	27.8267	16.4187	8.69814	5.39024	0.00454448	-1.74263	down	Molecular Function: transferase activity (GO:0016740);;	[M]	Cell wall/membrane/envelope biogenesis	--	--	--	Cellulose synthase;; Cellulose synthase;; Cellulose synthase	Cellulose synthase-like protein H1 GN=OSJNBa0035F15.9 OS=Oryza sativa subsp. japonica (Rice) PE=2 SV=2	cellulose synthase H1-like protein [Medicago truncatula]
c116085.graph_c0	83.1677	41.8913	8.16789	5.91722	0.00111083	-3.22608	down	Molecular Function: protein serine/threonine phosphatase activity (GO:0004722);; Biological Process: protein dephosphorylation (GO:0006470);; Molecular Function: metal ion binding (GO:0046872);;	[T]	Signal transduction mechanisms	K17506|1.77078e-107|cam:101508412|probable protein phosphatase 2C 25-like; K17506 protein phosphatase 1L [EC:3.1.3.16] (A)	[T]	Signal transduction mechanisms	Protein phosphatase 2C	Probable protein phosphatase 2C 25 GN=At2g30020 OS=Arabidopsis thaliana (Mouse-ear cress) PE=1 SV=1	PREDICTED: probable protein phosphatase 2C 25-like [Cicer arietinum]
c116107.graph_c0	10.0408	9.802	2.07363	1.47541	0.00652721	-2.58621	down	--	--	--	--	--	--	--	--	--
c116127.graph_c0	12.9466	13.6365	36.0986	44.1068	0.00494523	1.52188	up	Molecular Function: acetyl-CoA C-acetyltransferase activity (GO:0003985);; Biological Process: sterol biosynthetic process (GO:0016126);; Biological Process: pentacyclic triterpenoid biosynthetic process (GO:0019745);;	[I]	Lipid transport and metabolism	K00626|2.34285e-76|mtr:MTR_091s0012|Acetyl-CoA acetyltransferase cytosolic; K00626 acetyl-CoA C-acetyltransferase [EC:2.3.1.9] (A)	[I]	Lipid transport and metabolism	Thiolase, C-terminal domain	Probable acetyl-CoA acetyltransferase, cytosolic 2 GN=At5g47720 OS=Arabidopsis thaliana (Mouse-ear cress) PE=2 SV=1	PREDICTED: probable acetyl-CoA acetyltransferase, cytosolic 2-like isoform X2 [Cicer arietinum]
c116154.graph_c0	41.1718	62.1371	0.571933	12.2309	0.00253575	-2.99756	down	--	[IQR]	--	K00059|5.1518e-154|cam:101498708|short-chain type dehydrogenase/reductase-like; K00059 3-oxoacyl-[acyl-carrier protein] reductase [EC:1.1.1.100] (A)	[R]	General function prediction only	short chain dehydrogenase;; Enoyl-(Acyl carrier protein) reductase;; KR domain	Short-chain type dehydrogenase/reductase OS=Picea abies (Norway spruce) PE=2 SV=1	unknown [Medicago truncatula]
c116182.graph_c0	6.50321	2.79634	27.5766	29.5879	1.14e-08	2.5753	up	Molecular Function: glutamate decarboxylase activity (GO:0004351);; Molecular Function: calmodulin binding (GO:0005516);; Biological Process: glutamate metabolic process (GO:0006536);; Cellular Component: plasmodesma (GO:0009506);; Molecular Function: pyridoxal phosphate binding (GO:0030170);;	[E]	Amino acid transport and metabolism	K01580|0|cam:101507582|glutamate decarboxylase-like; K01580 glutamate decarboxylase [EC:4.1.1.15] (A)	[E]	Amino acid transport and metabolism	Pyridoxal-dependent decarboxylase conserved domain	Glutamate decarboxylase OS=Solanum lycopersicum (Tomato) PE=1 SV=1	glutamate decarboxylase [Medicago truncatula]
c116185.graph_c0	45.5452	42.3052	160.983	106.859	0.000739043	1.50278	up	Cellular Component: extracellular region (GO:0005576);; Biological Process: plant-type cell wall organization (GO:0009664);; Cellular Component: membrane (GO:0016020);;	--	--	--	--	--	Pollen allergen;; Rare lipoprotein A (RlpA)-like double-psi beta-barrel	Expansin-A1 (Precursor) GN=F10D13_18 OS=Arabidopsis thaliana (Mouse-ear cress) PE=2 SV=1	Expansin [Medicago truncatula]
c116231.graph_c0	263.367	210.147	57.9107	41.1457	1.36e-07	-2.35205	down	Biological Process: isoprenoid biosynthetic process (GO:0008299);; Molecular Function: isomerase activity (GO:0016853);; Molecular Function: 1-deoxy-D-xylulose-5-phosphate reductoisomerase activity (GO:0030604);; Molecular Function: metal ion binding (GO:0046872);; Biological Process: oxidation-reduction process (GO:0055114);; Molecular Function: NADPH binding (GO:0070402);;	[I]	Lipid transport and metabolism	K00099|0|cam:101490762|1-deoxy-D-xylulose 5-phosphate reductoisomerase, chloroplastic-like; K00099 1-deoxy-D-xylulose-5-phosphate reductoisomerase [EC:1.1.1.267] (A)	--	--	1-deoxy-D-xylulose 5-phosphate reductoisomerase;; DXP reductoisomerase C-terminal domain;; 1-deoxy-D-xylulose 5-phosphate reductoisomerase C-terminal	1-deoxy-D-xylulose 5-phosphate reductoisomerase, chloroplastic (Precursor) GN=MQB2.11 OS=Arabidopsis thaliana (Mouse-ear cress) PE=2 SV=2	1-deoxy-D-xylulose 5-phosphate reductoisomerase [Medicago truncatula]
c116295.graph_c0	0.229146	0.0965427	1.99569	1.10441	0.000720575	3.16458	up	--	--	--	--	--	--	--	--	pollen protein Ole E I-like protein [Medicago truncatula]
c116300.graph_c0	0.0418548	0.0440852	7.39174	12.4704	5.28e-06	7.80104	up	Molecular Function: NADPH:quinone reductase activity (GO:0003960);; Molecular Function: zinc ion binding (GO:0008270);; Biological Process: oxidation-reduction process (GO:0055114);;	[CR]	--	--	[CR]	--	Zinc-binding dehydrogenase;; Zinc-binding dehydrogenase;; Alcohol dehydrogenase GroES-like domain	2-methylene-furan-3-one reductase (Precursor) GN=EO OS=Solanum lycopersicum (Tomato) PE=1 SV=1	Quinone oxidoreductase-like protein [Medicago truncatula]
c116345.graph_c0	3.63419	1.54743	0	0	9.47e-05		down	--	--	--	--	--	--	--	--	--
c116383.graph_c0	0.0464236	0.0488974	1.96542	3.76303	0.00213336	5.86511	up	--	--	--	--	--	--	--	--	--
c116399.graph_c0	0.195241	0.264401	2.15924	1.43594	0.00249584	2.84687	up	Biological Process: proteolysis (GO:0006508);; Molecular Function: cysteine-type peptidase activity (GO:0008234);;	[O]	Posttranslational modification, protein turnover, chaperones	--	[O]	Posttranslational modification, protein turnover, chaperones	Papain family cysteine protease;; Cathepsin propeptide inhibitor domain (I29);; Granulin	Oryzain alpha chain (Precursor) OS=Oryza sativa subsp. japonica (Rice) PE=1 SV=2	papain family cysteine protease [Medicago truncatula]
c116465.graph_c0	175.317	229.602	1392.47	1322.04	2.72e-08	2.64863	up	--	--	--	--	--	--	--	--	--
c116469.graph_c0	100.793	105.405	13.8637	41.5372	4.17e-05	-1.91663	down	Cellular Component: cytoplasm (GO:0005737);; Biological Process: protein folding (GO:0006457);; Biological Process: hyperosmotic response (GO:0006972);; Biological Process: response to heat (GO:0009408);; Biological Process: response to high light intensity (GO:0009644);; Biological Process: response to hydrogen peroxide (GO:0042542);; Molecular Function: unfolded protein binding (GO:0051082);;	[O]	Posttranslational modification, protein turnover, chaperones	K13993|3.25409e-81|cam:101504707|17.1 kDa class II heat shock protein-like; K13993 HSP20 family protein (A)	[O]	Posttranslational modification, protein turnover, chaperones	Hsp20/alpha crystallin family	17.1 kDa class II heat shock protein GN=HSP17.7 OS=Pisum sativum (Garden pea) PE=2 SV=1	heat shock protein 17.6 [Medicago sativa]
c116482.graph_c0	4.08708	3.22865	0	0.239835	3.24e-06	-4.87926	down	--	--	--	--	--	--	--	--	--
c116486.graph_c0	27.5258	27.8448	16.2864	7.16239	0.00738787	-1.37347	down	Biological Process: sulfate assimilation (GO:0000103);; Molecular Function: adenylylsulfate kinase activity (GO:0004020);; Molecular Function: ATP binding (GO:0005524);; Biological Process: phosphorylation (GO:0016310);; Biological Process: hydrogen sulfide biosynthetic process (GO:0070814);;	[P]	Inorganic ion transport and metabolism	K00860|2.07579e-111|cam:101492146|adenylyl-sulfate kinase, chloroplastic-like; K00860 adenylylsulfate kinase [EC:2.7.1.25] (A)	[P]	Inorganic ion transport and metabolism	Adenylylsulphate kinase;; AAA domain;; AAA domain	Adenylyl-sulfate kinase 1, chloroplastic (Precursor) OS=Arabidopsis thaliana (Mouse-ear cress) PE=1 SV=1	PREDICTED: adenylyl-sulfate kinase, chloroplastic-like [Cicer arietinum]
c116554.graph_c0	2.66588	1.67139	0	0	5.73e-08		down	--	--	--	--	--	--	--	--	hypothetical protein MtrDRAFT_AC148815g33v2 [Medicago truncatula]
c116568.graph_c0	21.9332	18.4734	10.3512	5.40463	0.00801015	-1.47503	down	--	--	--	--	[R]	General function prediction only	Cholesterol-capturing domain	--	hypothetical protein MTR_3g070400 [Medicago truncatula]
c116569.graph_c0	2.40296	2.37915	0	0	2.23e-08		down	--	--	--	--	--	--	--	--	--
c116575.graph_c0	2.56468	2.04929	11.1967	12.7226	7.24e-05	2.30942	up	--	--	--	--	[P]	Inorganic ion transport and metabolism	HCO3- transporter family	Probable boron transporter 2 GN=BOR2 OS=Arabidopsis thaliana (Mouse-ear cress) PE=2 SV=1	PREDICTED: boron transporter 1-like [Cicer arietinum]
c116576.graph_c0	9.63739	7.58299	0	0.754046	1.52e-10	-4.46153	down	--	[P]	Inorganic ion transport and metabolism	K03320|0|mtr:MTR_1g079760|Ammonium transporter; K03320 ammonium transporter, Amt family (A)	[P]	Inorganic ion transport and metabolism	Ammonium Transporter Family	Ammonium transporter 1 member 2 GN=AMT1-2 OS=Solanum lycopersicum (Tomato) PE=2 SV=1	Ammonium transporter [Medicago truncatula]
c116620.graph_c0	50.1211	23.9421	2.89427	1.31047	0.000318851	-4.24123	down	Cellular Component: mitochondrion (GO:0005739);; Biological Process: shoot system development (GO:0048367);;	--	--	--	--	--	DVL family	--	unknown [Medicago truncatula]
c116627.graph_c0	3.13066	1.87774	0.368172	0.285773	0.00146595	-3.01502	down	--	--	--	--	--	--	--	--	--
c116631.graph_c0	3.63469	2.37623	0.606426	0.411867	0.00586419	-2.65128	down	Molecular Function: copper ion binding (GO:0005507);; Molecular Function: ATP binding (GO:0005524);; Biological Process: copper ion transport (GO:0006825);; Cellular Component: integral component of membrane (GO:0016021);; Molecular Function: copper-transporting ATPase activity (GO:0043682);;	--	--	K17686|2.47439e-24|cam:101504726|putative copper-transporting ATPase HMA5-like; K17686 Cu+-exporting ATPase [EC:3.6.3.54] (A)	--	--	--	--	PREDICTED: putative copper-transporting ATPase HMA5-like [Cicer arietinum]
c116678.graph_c0	0	0.205327	26.6456	10.6766	0.000113999	7.28791	up	--	--	--	--	--	--	--	--	--
c116696.graph_c0	0	0	7.57525	4.6647	4.22e-11		up	--	--	--	--	--	--	--	--	--
c116705.graph_c0	17.0032	21.2202	7.02863	4.43453	0.00153821	-1.85813	down	--	[R]	General function prediction only	--	[R]	General function prediction only	C2 domain	Probable ADP-ribosylation factor GTPase-activating protein AGD13 GN=AGD13 OS=Arabidopsis thaliana (Mouse-ear cress) PE=2 SV=1	ADP-ribosylation factor GTPase-activating protein AGD12 [Medicago truncatula]
c116709.graph_c0	0.79147	0.588455	5.35004	5.42277	3.62e-06	2.8956	up	--	[Z]	Cytoskeleton	K10357|0|cam:101493262|unconventional myosin-Va-like; K10357 myosin V (A)	[Z]	Cytoskeleton	Myosin head (motor domain);; IQ calmodulin-binding motif	Myosin-2 GN=MDK4.10 OS=Arabidopsis thaliana (Mouse-ear cress) PE=2 SV=1	P-loop nucleoside triphosphate hydrolase superfamily protein [Medicago truncatula]
c116756.graph_c0	395.505	219.513	93.5402	35.5303	0.00284675	-2.37043	down	--	--	--	--	--	--	--	--	--
c116762.graph_c0	5.36112	4.03343	0	0.246743	1.48e-07	-5.19714	down	--	--	--	--	--	--	--	--	--
c116824.graph_c0	35.7312	32.1853	11.9272	7.91343	0.00222293	-1.87957	down	--	--	--	--	--	--	--	--	hypothetical protein MTR_5g061610 [Medicago truncatula]
c116834.graph_c0	1.6002	1.64535	0	0.0417343	3.53e-07	-6.24021	down	--	--	--	--	--	--	--	--	--
c116842.graph_c0	9.88234	6.80465	1.49869	1.00171	1.79e-05	-2.83141	down	--	--	--	--	--	--	C2 domain	--	PREDICTED: uncharacterized protein LOC101495376 [Cicer arietinum]
c116858.graph_c1	0	0	4.21383	4.49729	3.68e-09		up	--	--	--	--	--	--	--	--	--
c116867.graph_c0	58.8694	77.1972	22.0767	26.866	0.00767978	-1.55556	down	--	[V]	Defense mechanisms	--	[Q]	Secondary metabolites biosynthesis, transport and catabolism	ABC transporter transmembrane region;; ABC transporter	ABC transporter C family member 3 GN=MJG19.3 OS=Arabidopsis thaliana (Mouse-ear cress) PE=1 SV=1	multidrug resistance protein ABC transporter family protein [Medicago truncatula]
c116902.graph_c0	17.8785	13.9863	5.51151	5.22868	0.00673489	-1.64442	down	--	--	--	--	--	--	--	--	hypothetical protein MTR_2g005710 [Medicago truncatula]
c116954.graph_c0	1.73522	1.20105	0.179911	0.0543068	8.63e-05	-3.78642	down	--	--	--	--	--	--	--	--	--
c116958.graph_c0	0	0	19.421	4.43366	0.00989332		up	--	--	--	--	--	--	--	--	--
c116959.graph_c0	1.88146	1.16003	0.166525	0.301598	0.00331075	-2.72547	down	Molecular Function: binding (GO:0005488);; Cellular Component: membrane (GO:0016020);;	--	--	--	--	--	--	--	PREDICTED: enzymatic polyprotein-like [Cicer arietinum]
c116978.graph_c0	0.0357133	0	4.66555	4.18582	2.68e-10	7.94827	up	Molecular Function: transferase activity (GO:0016740);;	--	--	--	[R]	General function prediction only	--	Putative ribonuclease H protein At1g65750 GN=At1g65750 OS=Arabidopsis thaliana (Mouse-ear cress) PE=3 SV=1	PREDICTED: uncharacterized protein LOC102669369 [Glycine max]
c116982.graph_c0	1.20496	0.85976	4.93684	6.55689	0.00470168	2.42663	up	--	--	--	--	--	--	--	Suppressor of RPS4-RLD 1 {ECO:0000303|PubMed:15469494} OS=Arabidopsis thaliana (Mouse-ear cress) PE=1 SV=1	PREDICTED: tetratricopeptide repeat protein 13 [Malus domestica]
c116989.graph_c0	3.12876	3.61857	0.37104	0.671998	0.00438348	-2.7446	down	--	--	--	--	--	--	--	--	--
c117048.graph_c0	42.8133	32.0546	10.8194	9.97682	6.98e-05	-1.92358	down	Cellular Component: cytoplasmic membrane-bounded vesicle (GO:0016023);;	--	--	--	--	--	Protein of unknown function (DUF3339)	--	transmembrane protein, putative [Medicago truncatula]
c117066.graph_c0	595.044	700.582	83.5229	26.2992	6.14e-12	-3.71827	down	Molecular Function: inositol-3-phosphate synthase activity (GO:0004512);; Biological Process: inositol biosynthetic process (GO:0006021);; Biological Process: phospholipid biosynthetic process (GO:0008654);;	[I]	Lipid transport and metabolism	K01858|0|mtr:MTR_3g087590|L-myo inositol-1 phosphate synthase; K01858 myo-inositol-1-phosphate synthase [EC:5.5.1.4] (A)	[I]	Lipid transport and metabolism	Myo-inositol-1-phosphate synthase;; Myo-inositol-1-phosphate synthase;; Myo-inositol-1-phosphate synthase	Inositol-3-phosphate synthase GN=INPS1 OS=Nicotiana paniculata PE=2 SV=1	myo-inositol-1-phosphate synthase [Trifolium repens]
c117077.graph_c0	0	0	3.18149	3.0611	3.96e-08		up	Biological Process: cellular process (GO:0009987);;	--	--	K03650|1.85034e-12|mtr:MTR_146s0004|tRNA modification GTPase mnmE; K03650 tRNA modification GTPase [EC:3.6.-.-] (A)	[J]	Translation, ribosomal structure and biogenesis	--	--	tRNA modification GTPase mnmE [Medicago truncatula]
c117084.graph_c0	140.687	137.55	37.4954	32.8202	1.05e-06	-2.07419	down	--	--	--	--	--	--	--	--	--
c117095.graph_c0	128.468	68.7619	11.7041	7.78949	9.47e-05	-3.42219	down	--	--	--	--	--	--	--	--	unknown [Medicago truncatula]
c117101.graph_c0	3.95999	2.64503	0	0.528989	0.000145395	-3.58389	down	Biological Process: defense response (GO:0006952);; Molecular Function: ADP binding (GO:0043531);;	--	--	--	--	--	FNIP Repeat	Putative disease resistance protein RGA4 GN=RGA4 OS=Solanum bulbocastanum (Wild potato) PE=2 SV=1	NBS-LRR type disease resistance protein [Medicago truncatula]
c117103.graph_c0	0	0	4.61631	1.60247	0.00216087		up	--	[R]	General function prediction only	--	[R]	General function prediction only	--	Probable cytosolic iron-sulfur protein assembly protein CIAO1 homolog {ECO:0000255|HAMAP-Rule:MF_03037} GN=CHLREDRAFT_130093 OS=Chlamydomonas reinhardtii (Chlamydomonas smithii) PE=3 SV=1	unknown [Medicago truncatula]
c117104.graph_c0	139.787	93.9529	26.6513	22.0357	2.23e-08	-2.3416	down	--	--	--	--	--	--	Proline-rich nuclear receptor coactivator	--	unknown [Medicago truncatula]
c117117.graph_c1	1.09378	0.0886201	11.1951	10.3221	5.56e-06	4.16953	up	--	--	--	--	--	--	--	--	--
c117132.graph_c0	46.3298	54.5836	21.829	15.8795	0.000889199	-1.52948	down	--	--	--	--	--	--	--	--	transmembrane protein, putative [Medicago truncatula]
c117156.graph_c0	16.4463	11.8524	3.85161	4.57148	0.000949635	-1.80603	down	--	--	--	--	[TO]	--	OTU-like cysteine protease	OTU domain-containing protein At3g57810 GN=At3g57810 OS=Arabidopsis thaliana (Mouse-ear cress) PE=2 SV=1	PREDICTED: OTU domain-containing protein At3g57810-like [Cicer arietinum]
c117173.graph_c0	20.9681	24.1409	130.081	147.314	1.71e-08	2.54068	up	Molecular Function: oxidoreductase activity (GO:0016491);; Biological Process: oxidation-reduction process (GO:0055114);;	[IQR]	--	--	[I]	Lipid transport and metabolism	short chain dehydrogenase;; Enoyl-(Acyl carrier protein) reductase	3-dehydrosphinganine reductase TSC10B GN=TSC10B OS=Arabidopsis thaliana (Mouse-ear cress) PE=1 SV=1	3-ketoacyl-CoA reductase [Medicago truncatula]
c117199.graph_c0	1.51461	0.645723	32.367	22.0025	8.48e-18	4.57972	up	Biological Process: flavonoid biosynthetic process (GO:0009813);; Molecular Function: oxidoreductase activity (GO:0016491);; Molecular Function: 6'-deoxychalcone synthase activity (GO:0033808);; Biological Process: oxidation-reduction process (GO:0055114);;	[R]	General function prediction only	--	[R]	General function prediction only	Aldo/keto reductase family	NAD(P)H-dependent 6&apos;-deoxychalcone synthase OS=Glycine max (Soybean) PE=1 SV=1	NAD(P)H-dependent 6&apos;-deoxychalcone synthase [Medicago truncatula]
c117239.graph_c0	6.1913	4.66378	0.0231861	0.566904	2.57e-09	-4.15711	down	--	--	--	--	--	--	--	--	--
c117257.graph_c0	5.15302	4.7675	19.4296	12.6875	0.00166042	1.5885	up	--	--	--	--	[M]	Cell wall/membrane/envelope biogenesis	Pectinacetylesterase	--	Notum-like protein [Medicago truncatula]
c117286.graph_c0	0.334207	0.0391128	2.02131	1.09825	0.00185254	3.00798	up	--	--	--	--	[S]	Function unknown	VIT family	Vacuolar iron transporter homolog 2.1 GN=At3g25190 OS=Arabidopsis thaliana (Mouse-ear cress) PE=1 SV=1	vacuolar iron transporter-like protein [Medicago truncatula]
c117289.graph_c0	3.08787	1.86713	0	0.626371	0.00166042	-2.92152	down	--	--	--	--	[R]	General function prediction only	Reverse transcriptase (RNA-dependent DNA polymerase)	--	hypothetical protein MTR_1g026010 [Medicago truncatula]
c117305.graph_c0	2.267	1.38493	0	0	4.04e-08		down	--	--	--	--	--	--	--	--	Putative ribonuclease H protein, partial [Glycine soja]
c117317.graph_c0	0.0128751	0	1.88444	2.07316	1.39e-11	8.27208	up	--	--	--	--	[Z]	Cytoskeleton	Myosin tail	--	--
c117355.graph_c0	2.17947	1.59997	0.559222	0.144689	0.00632135	-2.57261	down	--	--	--	--	--	--	--	--	--
c117357.graph_c0	0.103165	0	0.93593	1.0453	2.76e-05	4.27252	up	--	[Q]	Secondary metabolites biosynthesis, transport and catabolism	--	[QI]	--	Cytochrome P450	Cytochrome P450 714A1 GN=F6A4.120 OS=Arabidopsis thaliana (Mouse-ear cress) PE=2 SV=1	PREDICTED: cytokinin hydroxylase-like [Cicer arietinum]
c117399.graph_c0	82.1773	102.64	41.7202	14.1637	0.0021462	-1.88204	down	Biological Process: regulation of transcription, DNA-templated (GO:0006355);;	--	--	--	--	--	GRAS domain family;; GRAS domain family	Scarecrow-like protein 9 GN=SCL9 OS=Arabidopsis thaliana (Mouse-ear cress) PE=2 SV=1	GRAS family transcription factor [Medicago truncatula]
c117416.graph_c0	2.28686	2.33102	0	0.242418	2.36e-05	-4.21043	down	--	--	--	--	--	--	--	--	--
c117448.graph_c0	1.13688	1.07772	0	0.0415108	1.02e-06	-5.69322	down	--	--	--	--	[U]	Intracellular trafficking, secretion, and vesicular transport	Exo70 exocyst complex subunit	Exocyst complex component EXO70B1 GN=EXO70B1 OS=Arabidopsis thaliana (Mouse-ear cress) PE=1 SV=1	Leucine zipper protein [Medicago truncatula]
c117452.graph_c0	4.51286	3.4252	0	0	3.81e-11		down	--	--	--	--	--	--	--	--	--
c117460.graph_c0	13.4505	9.54751	3.53696	2.58237	5.41e-05	-1.99857	down	--	--	--	--	[O]	Posttranslational modification, protein turnover, chaperones	Xylanase inhibitor N-terminal;; Xylanase inhibitor C-terminal;; Eukaryotic aspartyl protease	Protein ASPARTIC PROTEASE IN GUARD CELL 1 (Precursor) GN=ASPG1 OS=Arabidopsis thaliana (Mouse-ear cress) PE=1 SV=1	eukaryotic aspartyl protease family protein [Medicago truncatula]
c117466.graph_c0	1.51475	1.02819	0.162869	0	3.39e-05	-4.16685	down	--	--	--	--	[R]	General function prediction only	zinc-binding in reverse transcriptase	Putative ribonuclease H protein At1g65750 GN=At1g65750 OS=Arabidopsis thaliana (Mouse-ear cress) PE=3 SV=1	PREDICTED: uncharacterized protein LOC102664824 [Glycine max]
c117480.graph_c0	1.03825	1.21856	0.0358826	0.0649877	1.19e-05	-4.53538	down	--	--	--	--	[R]	General function prediction only	Reverse transcriptase (RNA-dependent DNA polymerase)	Endonuclease OS=Nicotiana tabacum (Common tobacco) PE=2 SV=1	Retrovirus-related Pol polyprotein from transposon TNT 1-94, partial [Glycine soja]
c117515.graph_c0	1.93744	1.20524	0.125829	0.213649	0.000176574	-3.24038	down	--	--	--	--	[T]	Signal transduction mechanisms	NB-ARC domain;; NACHT domain	Probable disease resistance RPP8-like protein 2 GN=RPP8L2 OS=Arabidopsis thaliana (Mouse-ear cress) PE=3 SV=1	NB-ARC domain disease resistance protein [Medicago truncatula]
c117547.graph_c0	23.1623	8.56018	44.881	38.143	0.00734407	1.33349	up	--	--	--	--	--	--	Protein of unknown function (DUF642)	--	DUF642 family protein [Medicago truncatula]
c117588.graph_c0	0.357665	0.15069	3.46111	1.80219	0.000507245	3.2822	up	Molecular Function: UDP-N-acetylmuramate dehydrogenase activity (GO:0008762);; Biological Process: oxidation-reduction process (GO:0055114);;	--	--	--	--	--	FAD binding domain	Cannabidiolic acid synthase-like 1 (Precursor) GN=CBDAS2 OS=Cannabis sativa (Hemp) PE=2 SV=1	FAD-binding berberine family protein [Medicago truncatula]
c117644.graph_c0	0.343992	0.181161	2.65263	1.36591	0.00300626	2.83724	up	--	[R]	General function prediction only	K00588|1.16295e-145|cam:101511458|caffeoyl-CoA O-methyltransferase-like; K00588 caffeoyl-CoA O-methyltransferase [EC:2.1.1.104] (A)	[Q]	Secondary metabolites biosynthesis, transport and catabolism	O-methyltransferase;; Methyltransferase domain;; Methyltransferase domain;; Methyltransferase domain;; Protein-L-isoaspartate(D-aspartate) O-methyltransferase (PCMT)	Flavonoid 3&apos;,5&apos;-methyltransferase GN=FAOMT OS=Vitis vinifera (Grape) PE=1 SV=1	PREDICTED: caffeoyl-CoA O-methyltransferase-like [Cicer arietinum]
c117645.graph_c0	0.0729917	0.0384406	2.42804	1.0394	0.00138097	4.85026	up	--	--	--	--	--	--	--	--	--
c117674.graph_c0	176.583	114.514	57.8701	21.0385	0.000213484	-2.00958	down	--	--	--	--	--	--	Phosphate-induced protein 1 conserved region	Protein EXORDIUM (Precursor) GN=EXO OS=Arabidopsis thaliana (Mouse-ear cress) PE=2 SV=1	unknown [Medicago truncatula]
c117698.graph_c0	0	0	1.51289	1.46135	4.39e-08		up	--	--	--	--	[R]	General function prediction only	F-box domain;; Leucine Rich repeat	Putative F-box/LRR-repeat protein 23 GN=FBL23 OS=Arabidopsis thaliana (Mouse-ear cress) PE=3 SV=1	F-box/LRR protein [Medicago truncatula]
c117801.graph_c0	56.7417	35.6857	11.2732	8.91137	6.76e-06	-2.27365	down	--	--	--	--	--	--	--	--	transmembrane protein, putative [Medicago truncatula]
c117830.graph_c0	0	0	21.179	16.2107	7.23e-10		up	--	--	--	--	--	--	--	--	--
c117835.graph_c0	19.1669	18.8435	5.65021	7.70903	0.000496377	-1.5701	down	Biological Process: cell-cell signaling (GO:0007267);; Biological Process: virus induced gene silencing (GO:0009616);; Biological Process: determination of bilateral symmetry (GO:0009855);; Biological Process: meristem initiation (GO:0010014);; Biological Process: vegetative phase change (GO:0010050);; Biological Process: meristem maintenance (GO:0010073);; Biological Process: production of ta-si…	--	--	--	[U]	Intracellular trafficking, secretion, and vesicular transport	--	Exocyst complex component EXO84C GN=EXO84C OS=Arabidopsis thaliana (Mouse-ear cress) PE=2 SV=1	hypothetical protein MTR_4g083940 [Medicago truncatula]
c117860.graph_c0	11.7855	10.9473	1.12251	0.406602	7.18e-06	-4.03504	down	--	--	--	--	--	--	--	--	--
c117896.graph_c0	0.811013	0.619317	0.147153	0.0888371	0.00448856	-2.70302	down	--	--	--	--	[L]	Replication, recombination and repair	hAT family C-terminal dimerisation region;; Domain of unknown function (DUF4413);; BED zinc finger	Putative AC transposase OS=Zea mays (Maize) PE=2 SV=2	hypothetical protein PRUPE_ppa026473mg [Prunus persica]
c117904.graph_c0	18.1457	16.7452	5.17236	4.50374	0.0022342	-1.93813	down	Cellular Component: integral component of membrane (GO:0016021);;	--	--	--	--	--	Hypoxia induced protein conserved region	--	hypothetical protein MTR_1g083420 [Medicago truncatula]
c117935.graph_c0	64.765	46.9842	7.39362	12.1087	3e-09	-2.55657	down	--	--	--	--	--	--	Late embryogenesis abundant protein	--	late embryogenesis abundant hydroxyproline-rich glycoprotein, putative [Medicago truncatula]
c117951.graph_c0	0.155081	0.980071	5.06491	8.15393	0.00754071	3.43136	up	--	--	--	--	--	--	Thaumatin family	Pathogenesis-related protein 5 (Precursor) GN=At1g75040 OS=Arabidopsis thaliana (Mouse-ear cress) PE=1 SV=1	PREDICTED: pathogenesis-related protein 5-like [Cicer arietinum]
c117969.graph_c0	0.925275	0.338985	21.0707	13.4403	2.65e-13	4.69807	up	Molecular Function: chitinase activity (GO:0004568);; Biological Process: carbohydrate metabolic process (GO:0005975);;	--	--	K01183|4.33782e-119|mtr:MTR_6g023340|Chitinase class III-1; K01183 chitinase [EC:3.2.1.14] (A)	[M]	Cell wall/membrane/envelope biogenesis	Glycosyl hydrolases family 18	Basic endochitinase (Precursor) OS=Nicotiana tabacum (Common tobacco) PE=2 SV=1	unknown [Medicago truncatula]
c117972.graph_c0	14.5649	11.2802	54.1926	29.875	0.00832236	1.59203	up	Biological Process: metabolic process (GO:0008152);; Molecular Function: hydrolase activity (GO:0016787);;	[R]	General function prediction only	--	--	--	Haloacid dehalogenase-like hydrolase;; haloacid dehalogenase-like hydrolase;; HAD-hyrolase-like	Haloacid dehalogenase-like hydrolase domain-containing protein At4g39970 (Precursor) GN=At4g39970 OS=Arabidopsis thaliana (Mouse-ear cress) PE=2 SV=1	haloacid dehalogenase-like hydrolase [Medicago truncatula]
c118000.graph_c0	0.269528	0.0946302	4.23834	2.95237	2.37e-05	4.23783	up	--	--	--	--	--	--	--	--	--
c118020.graph_c0	102.817	89.3828	51.6504	28.4019	0.00286763	-1.37808	down	--	--	--	--	--	--	VQ motif	--	PREDICTED: uncharacterized protein LOC101498579 [Cicer arietinum]
c118023.graph_c2	4.9246	2.05612	0.107331	0.291585	0.00909771	-4.11869	down	Biological Process: cation transport (GO:0006812);; Molecular Function: cation transmembrane transporter activity (GO:0008324);; Molecular Function: efflux transmembrane transporter activity (GO:0015562);; Cellular Component: integral component of membrane (GO:0016021);; Biological Process: transmembrane transport (GO:0055085);;	--	--	K14696|1.51899e-09|cit:102614866|metal tolerance protein C4-like; K14696 solute carrier family 30 (zinc transporter), member 9 (A)	--	--	--	Metal tolerance protein C4 OS=Arabidopsis thaliana (Mouse-ear cress) PE=2 SV=1	hypothetical protein CISIN_1g0116441mg, partial [Citrus sinensis]
c118056.graph_c0	5.47166	2.46367	0	0.366019	0.00181527	-4.36498	down	--	--	--	--	--	--	--	--	--
c118102.graph_c0	0.450901	0.158309	2.78769	2.14027	0.00224342	2.95656	up	Molecular Function: nucleic acid binding (GO:0003676);; Biological Process: protein targeting to mitochondrion (GO:0006626);; Cellular Component: ribonucleoprotein complex (GO:0030529);;	--	--	K13153|3.45924e-52|vvi:100255803|	--	--	--	U11/U12 small nuclear ribonucleoprotein 25 kDa protein GN=SNRNP25 OS=Arabidopsis thaliana (Mouse-ear cress) PE=2 SV=1	U11/U12 small nuclear ribonucleoprotein 25 kDa protein [Medicago truncatula]
c118128.graph_c0	232.507	250.975	115.794	75.1113	0.00500621	-1.45368	down	Cellular Component: integral component of membrane (GO:0016021);; Molecular Function: substrate-specific transmembrane transporter activity (GO:0022891);; Biological Process: transmembrane transport (GO:0055085);;	[GEPR]	--	--	[R]	General function prediction only	Sugar (and other) transporter;; Major Facilitator Superfamily	Polyol transporter 5 GN=PLT5 OS=Arabidopsis thaliana (Mouse-ear cress) PE=1 SV=2	polyol/monosaccharide transporter 1 [Medicago truncatula]
c118132.graph_c0	0.521934	0.604721	10.8591	4.80243	0.00224804	3.65804	up	--	--	--	--	--	--	--	--	--
c118160.graph_c0	3.77115	3.49354	0.0549597	0.746541	0.000602496	-3.15139	down	--	--	--	--	--	--	C2 domain	C2 and GRAM domain-containing protein At1g03370 GN=At1g03370 OS=Arabidopsis thaliana (Mouse-ear cress) PE=2 SV=4	PREDICTED: uncharacterized protein LOC102604455 [Solanum tuberosum]
c118160.graph_c1	2.82689	3.22566	0.474926	0.602104	0.00723808	-2.56271	down	--	--	--	--	--	--	Plant phosphoribosyltransferase C-terminal;; Protein of unknown function (DUF3292)	--	calcium-dependent lipid-binding (CaLB domain) family protein [Medicago truncatula]
c118176.graph_c0	75.1536	104.008	18.0744	10.9834	0.00010372	-2.75141	down	--	[O]	Posttranslational modification, protein turnover, chaperones	K13993|3.86342e-75|cam:101499292|heat shock 22 kDa protein, mitochondrial-like; K13993 HSP20 family protein (A)	[O]	Posttranslational modification, protein turnover, chaperones	Hsp20/alpha crystallin family	Heat shock 22 kDa protein, mitochondrial (Precursor) GN=HSP22 OS=Pisum sativum (Garden pea) PE=2 SV=1	RecName: Full=Heat shock 22 kDa protein, mitochondrial; Flags: Precursor [Pisum sativum]
c118182.graph_c0	26.6814	19.2072	3.63763	3.71462	5.16e-06	-2.70923	down	--	--	--	K10845|4.59803e-41|cam:101507280|general transcription factor IIH subunit 5-like; K10845 TFIIH basal transcription factor complex TTD-A subunit (A)	[S]	Function unknown	Transcription factor TFIIH complex subunit Tfb5	--	PREDICTED: general transcription factor IIH subunit 5-like [Cicer arietinum]
c118213.graph_c0	5.16125	3.91564	0.785851	0.751172	0.00230558	-2.63581	down	--	--	--	K17099|0|cam:101501647|annexin A13-like; K17099 annexin A13 (A)	[U]	Intracellular trafficking, secretion, and vesicular transport	Annexin	Annexin D8 GN=T2L20 OS=Arabidopsis thaliana (Mouse-ear cress) PE=2 SV=2	annexin D8 [Medicago truncatula]
c118216.graph_c0	106.06	77.0983	36.2545	21.6581	4.53e-05	-1.76328	down	--	[T]	Signal transduction mechanisms	K14803|0|gmx:100798957|probable protein phosphatase 2C 13-like; K14803 protein phosphatase 2C homolog 2/3 [EC:3.1.3.16] (A)	[T]	Signal transduction mechanisms	Protein phosphatase 2C;; Protein phosphatase 2C	Probable protein phosphatase 2C 13 GN=At1g48040 OS=Arabidopsis thaliana (Mouse-ear cress) PE=2 SV=2	PREDICTED: probable protein phosphatase 2C 13-like [Glycine max]
c118224.graph_c0	0	0	1.13353	1.32588	5.51e-08		up	--	--	--	--	--	--	--	--	PREDICTED: uncharacterized protein LOC102662229 [Glycine max]
c118276.graph_c0	0.403092	0.555209	8.17647	7.3024	8.75e-08	3.91136	up	Molecular Function: oxidoreductase activity, acting on single donors with incorporation of molecular oxygen, incorporation of two atoms of oxygen (GO:0016702);; Molecular Function: oxidoreductase activity, acting on paired donors, with incorporation or reduction of molecular oxygen, 2-oxoglutarate as one donor, and incorporation of one atom each of oxygen into both donors (GO:0016706);; Biologica…	[R]	General function prediction only	--	[QR]	--	non-haem dioxygenase in morphine synthesis N-terminal;; 2OG-Fe(II) oxygenase superfamily	Protein SRG1 GN=SRG1 OS=Arabidopsis thaliana (Mouse-ear cress) PE=2 SV=1	PREDICTED: zinc finger CCCH domain-containing protein 19-like [Cicer arietinum]
c118285.graph_c0	20.7672	22.8696	9.18668	4.66008	0.000332856	-1.785	down	--	[H]	Coenzyme transport and metabolism	K06215|3.41572e-143|cam:101488342|probable pyridoxal biosynthesis protein PDX1.2-like; K06215 pyridoxal 5'-phosphate synthase pdxS subunit [EC:4.3.3.6] (A)	[H]	Coenzyme transport and metabolism	SOR/SNZ family;; Dihydrouridine synthase (Dus);; Thiazole biosynthesis protein ThiG	Probable pyridoxal biosynthesis protein PDX1.2 GN=MSL1.3 OS=Arabidopsis thaliana (Mouse-ear cress) PE=1 SV=1	PREDICTED: probable pyridoxal biosynthesis protein PDX1.2-like [Cicer arietinum]
c118293.graph_c0	0.223099	0.234987	19.97	7.20918	0.00269026	5.74439	up	--	--	--	--	--	--	--	--	PREDICTED: uncharacterized protein LOC101512886 [Cicer arietinum]
c118294.graph_c0	4.17567	3.51264	1.05087	0.67535	0.00920304	-2.25853	down	--	[V]	Defense mechanisms	K03327|0|mtr:MTR_3g099720|Protein TRANSPARENT TESTA; K03327 multidrug resistance protein, MATE family (A)	[R]	General function prediction only	MatE;; MatE	Protein TRANSPARENT TESTA 12 GN=F17J16_80 OS=Arabidopsis thaliana (Mouse-ear cress) PE=2 SV=1	Protein TRANSPARENT TESTA [Medicago truncatula]
c118341.graph_c0	57.3567	53.7006	4.52213	18.469	4.32e-08	-2.275	down	Biological Process: metabolic process (GO:0008152);; Molecular Function: transferase activity, transferring hexosyl groups (GO:0016758);;	--	--	--	[GC]	--	UDP-glucoronosyl and UDP-glucosyl transferase	Anthocyanidin 3-O-glucosyltransferase 5 GN=GT5 OS=Manihot esculenta (Cassava) PE=2 SV=1	Anthocyanidin 3-O-glucosyltransferase [Medicago truncatula]
c118361.graph_c1	10.0516	4.67656	0.0745926	0.135096	3.12e-05	-6.14922	down	--	--	--	--	--	--	--	--	FBD-associated F-box protein [Medicago truncatula]
c118411.graph_c0	3.20074	1.78481	0.455492	0.206238	0.00141233	-3.02178	down	--	--	--	--	--	--	--	--	--
c118444.graph_c0	6.15498	5.08878	22.2555	28.7806	0.00161612	2.12456	up	Biological Process: response to gibberellin (GO:0009739);;	--	--	--	--	--	Gibberellin regulated protein	Gibberellin-regulated protein 4 (Precursor) GN=GASA4 OS=Arabidopsis thaliana (Mouse-ear cress) PE=1 SV=2	Gibberellin-regulated protein [Medicago truncatula]
c118446.graph_c0	58.1872	45.685	12.4587	12.8104	1.06e-06	-2.10977	down	--	--	--	--	--	--	Protein of unknown function (DUF1645)	Novel plant SNARE 13 GN=NPSN13 OS=Arabidopsis thaliana (Mouse-ear cress) PE=1 SV=1	hypothetical protein MTR_5g034230 [Medicago truncatula]
c118460.graph_c0	2.66395	1.68354	0	0.265277	1.78e-05	-3.97406	down	--	--	--	--	--	--	--	--	--
c118477.graph_c0	3.34859	2.53223	0	0.282154	1.58e-05	-4.32807	down	--	--	--	--	--	--	--	--	--
c118525.graph_c0	0.508152	1.15967	9.93717	5.19513	0.000829795	3.02678	up	Molecular Function: kinase activity (GO:0016301);; Biological Process: phosphorylation (GO:0016310);;	--	--	--	--	--	--	--	verticillium wilt disease resistance protein [Medicago truncatula]
c118596.graph_c0	78.7962	97.9977	864.61	671.205	2.6e-11	3.01154	up	--	--	--	--	[R]	General function prediction only	Barwin family	Pathogenesis-related protein P2 (Precursor) OS=Solanum lycopersicum (Tomato) PE=1 SV=1	PR4 [Lens culinaris]
c118613.graph_c0	5.93916	5.42315	16.4716	18.206	0.00203464	1.53785	up	--	[E]	Amino acid transport and metabolism	K00827|0|mtr:MTR_8g091660|Alanine-glyoxylate aminotransferase-like protein; K00827 alanine-glyoxylate transaminase / (R)-3-amino-2-methylpropionate-pyruvate transaminase [EC:2.6.1.44 2.6.1.40] (A)	[E]	Amino acid transport and metabolism	Aminotransferase class-III	Alanine--glyoxylate aminotransferase 2 homolog 1, mitochondrial (Precursor) GN=AGT2 OS=Arabidopsis thaliana (Mouse-ear cress) PE=2 SV=1	Alanine-glyoxylate aminotransferase-like protein [Medicago truncatula]
c118631.graph_c0	2.19099	2.88468	0.35077	0.494112	0.00509357	-2.65815	down	--	[RTKL]	--	--	--	--	Protein kinase domain;; Protein tyrosine kinase;; Leucine Rich repeats (2 copies);; Leucine rich repeat N-terminal domain	Probable leucine-rich repeat receptor-like protein kinase At1g68400 (Precursor) GN=At1g68400 OS=Arabidopsis thaliana (Mouse-ear cress) PE=2 SV=1	PREDICTED: probable leucine-rich repeat receptor-like protein kinase At1g68400-like [Cicer arietinum]
c118702.graph_c0	60.5546	42.2724	0.901514	1.71439	1.35e-28	-5.32453	down	Biological Process: transcription, DNA-templated (GO:0006351);;	--	--	--	--	--	AP2 domain	Ethylene-responsive transcription factor ERF017 GN=ERF017 OS=Arabidopsis thaliana (Mouse-ear cress) PE=2 SV=1	unknown [Medicago truncatula]
c118705.graph_c0	65.9231	56.1415	20.0364	21.0695	0.000176958	-1.64249	down	Biological Process: proteolysis (GO:0006508);; Biological Process: signal transduction (GO:0007165);; Biological Process: response to hormone (GO:0009725);; Cellular Component: membrane (GO:0016020);; Biological Process: cellular catabolic process (GO:0044248);; Biological Process: single-organism metabolic process (GO:0044710);;	[U]	Intracellular trafficking, secretion, and vesicular transport	--	--	--	WD40-like Beta Propeller Repeat;; Dipeptidyl peptidase IV (DPP IV) N-terminal region	--	Protein tolB [Medicago truncatula]
c118750.graph_c0	0.405219	0.142271	4.94245	2.0714	0.00933423	3.58296	up	--	--	--	--	--	--	--	--	--
c118799.graph_c0	73.1265	32.009	157.22	177.427	0.0028504	1.62842	up	Cellular Component: cytoplasmic membrane-bounded vesicle (GO:0016023);;	--	--	--	--	--	Thaumatin family	Thaumatin-like protein (Precursor) OS=Oryza sativa subsp. japonica (Rice) PE=1 SV=1	pathogenesis-related thaumatin family protein [Medicago truncatula]
c118813.graph_c0	124.874	106.325	24.8522	19.5294	1.23e-08	-2.47223	down	Molecular Function: zinc ion binding (GO:0008270);;	--	--	K11982|3.91788e-168|mtr:MTR_4g064570|RING finger protein; K11982 E3 ubiquitin-protein ligase RNF115/126 [EC:6.3.2.19] (A)	[O]	Posttranslational modification, protein turnover, chaperones	Protein of unknown function (DUF1117);; Ring finger domain;; zinc-finger;; Zinc finger, C3HC4 type (RING finger);; Zinc finger, C3HC4 type (RING finger)	E3 ubiquitin-protein ligase RING1 GN=RING1 OS=Gossypium hirsutum (Upland cotton) PE=1 SV=1	RING finger protein [Medicago truncatula]
c118883.graph_c0	0	0	14.8205	8.53216	4.84e-18		up	--	--	--	--	--	--	--	--	--
c118917.graph_c0	7.22108	5.67104	0.153241	0.693847	1.73e-05	-3.91964	down	--	--	--	--	--	--	--	--	--
c118940.graph_c0	0	0.0391128	7.18689	10.169	6.08e-10	8.65414	up	Biological Process: cellular metabolic process (GO:0044237);; Molecular Function: dihydrokaempferol 4-reductase activity (GO:0045552);; Molecular Function: coenzyme binding (GO:0050662);; Biological Process: oxidation-reduction process (GO:0055114);;	[MG]	--	--	[V]	Defense mechanisms	NAD dependent epimerase/dehydratase family;; 3-beta hydroxysteroid dehydrogenase/isomerase family;; NADH(P)-binding;; Male sterility protein;; NmrA-like family;; Polysaccharide biosynthesis protein	Tetraketide alpha-pyrone reductase 2 GN=T26J14.11 OS=Arabidopsis thaliana (Mouse-ear cress) PE=1 SV=1	Dihydroflavonol-4-reductase [Medicago truncatula]
c118947.graph_c0	3.66372	2.61412	0	0.517829	0.000183889	-3.54399	down	--	--	--	--	[R]	General function prediction only	Leucine Rich repeats (2 copies);; Leucine rich repeat;; Leucine Rich Repeat;; Leucine rich repeat;; Leucine Rich repeat	Leucine-rich repeat receptor protein kinase EXS (Precursor) GN=T28J14.220 OS=Arabidopsis thaliana (Mouse-ear cress) PE=1 SV=1	Receptor-like protein kinase [Medicago truncatula]
c118965.graph_c0	10.7713	4.1345	29.1672	30.6868	1.48e-05	1.96362	up	Molecular Function: hydrolase activity, hydrolyzing O-glycosyl compounds (GO:0004553);; Biological Process: carbohydrate metabolic process (GO:0005975);;	[G]	Carbohydrate transport and metabolism	K05350|0|cam:101490358|beta-glucosidase 44-like; K05350 beta-glucosidase [EC:3.2.1.21] (A)	[G]	Carbohydrate transport and metabolism	Glycosyl hydrolase family 1	Beta-glucosidase 44 (Precursor) GN=BGLU44 OS=Arabidopsis thaliana (Mouse-ear cress) PE=2 SV=1	glycoside hydrolase family 1 protein [Medicago truncatula]
c118994.graph_c0	11.7709	10.118	2.12756	2.02544	0.000397036	-2.47706	down	Molecular Function: lyase activity (GO:0016829);;	[E]	Amino acid transport and metabolism	--	--	--	Glyoxalase-like domain;; Glyoxalase/Bleomycin resistance protein/Dioxygenase superfamily	--	PREDICTED: uncharacterized protein YwkD-like [Cicer arietinum]
c119068.graph_c0	65.0489	54.0615	23.2935	20.9276	0.00188665	-1.51096	down	Biological Process: RNA methylation (GO:0001510);; Cellular Component: mitochondrial inner membrane (GO:0005743);; Biological Process: photorespiration (GO:0009853);; Molecular Function: P-P-bond-hydrolysis-driven protein transmembrane transporter activity (GO:0015450);; Cellular Component: mitochondrial intermembrane space protein transporter complex (GO:0042719);; Biological Process: protein im…	--	--	K17780|6.8632e-47|mtr:MTR_3g098820|Mitochondrial import inner membrane translocase subunit Tim8; K17780 mitochondrial import inner membrane translocase subunit TIM8 (A)	[U]	Intracellular trafficking, secretion, and vesicular transport	Tim10/DDP family zinc finger	Mitochondrial import inner membrane translocase subunit TIM8 GN=TIM8 OS=Arabidopsis thaliana (Mouse-ear cress) PE=1 SV=1	Mitochondrial import inner membrane translocase subunit Tim8 [Medicago truncatula]
c119072.graph_c0	5.23656	3.01867	1.19837	0.465085	0.00673489	-2.42937	down	--	--	--	--	--	--	--	--	--
c119083.graph_c0	0	0.032779	3.53855	1.2613	0.00163891	6.96972	up	--	--	--	--	--	--	F-box associated	F-box/kelch-repeat protein At3g06240 GN=At3g06240 OS=Arabidopsis thaliana (Mouse-ear cress) PE=2 SV=1	F-box protein interaction domain protein [Medicago truncatula]
c119085.graph_c0	14.984	10.4493	2.70628	1.96701	4.74e-06	-2.53229	down	Biological Process: transcription, DNA-templated (GO:0006351);;	--	--	--	--	--	GRAS domain family	Scarecrow-like protein 33 GN=SCL33 OS=Arabidopsis thaliana (Mouse-ear cress) PE=1 SV=1	SCARECROW-like protein [Medicago truncatula]
c119088.graph_c0	40.5279	29.4288	100.741	76.9373	0.00959331	1.25821	up	--	--	--	--	[S]	Function unknown	Glycosyltransferase family 92;; Glycosyl transferase family 2	--	PREDICTED: uncharacterized protein LOC101489232 [Cicer arietinum]
c119102.graph_c0	41.5499	46.3478	1.85459	4.66047	9.03e-17	-3.78574	down	--	--	--	--	--	--	Plant invertase/pectin methylesterase inhibitor	21 kDa protein (Precursor) OS=Daucus carota (Wild carrot) PE=2 SV=1	unknown [Medicago truncatula]
c119175.graph_c0	31.0693	29.1417	9.97818	6.92529	1.86e-05	-1.93576	down	--	--	--	--	[R]	General function prediction only	C2H2-type zinc finger	Zinc finger protein ZAT10 GN=T22C5.18 OS=Arabidopsis thaliana (Mouse-ear cress) PE=2 SV=1	PREDICTED: zinc finger protein ZAT10-like [Cicer arietinum]
c119214.graph_c0	3.32084	2.04038	10.2432	13.3379	0.00717133	2.09147	up	--	--	--	--	--	--	C2 domain	--	C2 domain protein [Medicago truncatula]
c119217.graph_c0	0.0383755	0.242523	3.80642	6.17928	0.000266744	5.04196	up	Molecular Function: nucleic acid binding (GO:0003676);; Molecular Function: carboxylic ester hydrolase activity (GO:0004091);; Molecular Function: RNA-DNA hybrid ribonuclease activity (GO:0004523);; Biological Process: lipid metabolic process (GO:0006629);; Molecular Function: lipase activity (GO:0016298);;	--	--	--	--	--	GDSL-like Lipase/Acylhydrolase	GDSL esterase/lipase At1g71250 (Precursor) GN=At1g71250 OS=Arabidopsis thaliana (Mouse-ear cress) PE=2 SV=1	GDSL esterase/lipase [Medicago truncatula]
c119219.graph_c0	12.2785	11.2543	1.20082	1.68836	2.81e-08	-3.08275	down	Molecular Function: protein serine/threonine kinase activity (GO:0004674);; Molecular Function: ATP binding (GO:0005524);; Biological Process: protein phosphorylation (GO:0006468);;	[RTKL]	--	--	[R]	General function prediction only	Protein kinase domain;; Protein tyrosine kinase	Serine/threonine-protein kinase OXI1 GN=At3g25250 OS=Arabidopsis thaliana (Mouse-ear cress) PE=1 SV=1	Serine/threonine protein kinase OXI1 [Medicago truncatula]
c119224.graph_c0	14.4727	14.3187	46.1189	46.0704	0.000292545	1.59726	up	Molecular Function: cysteine-type endopeptidase activity (GO:0004197);; Biological Process: proteolysis (GO:0006508);; Biological Process: vacuolar protein processing (GO:0006624);;	--	--	K01369|0|mtr:MTR_4g101730|Vacuolar-processing enzyme; K01369 legumain [EC:3.4.22.34] (A)	[O]	Posttranslational modification, protein turnover, chaperones	Peptidase C13 family	Vacuolar-processing enzyme (Precursor) OS=Glycine max (Soybean) PE=2 SV=1	cysteine proteinase precursor [Vicia sativa]
c119275.graph_c0	0.535916	0	48.1869	22.6986	1.86e-07	7.00199	up	--	--	--	--	--	--	--	--	--
c119292.graph_c0	0	0	5.58389	5.05656	1.06e-10		up	Biological Process: mitotic cell cycle (GO:0000278);; Biological Process: DNA recombination (GO:0006310);; Biological Process: chromatin organization (GO:0006325);; Biological Process: regulation of transcription, DNA-templated (GO:0006355);; Biological Process: cellular protein modification process (GO:0006464);; Biological Process: response to stress (GO:0006950);; Biological Process: chromosom…	--	--	K02365|5.33672e-29|cam:101501526|uncharacterized LOC101501526; K02365 separase [EC:3.4.22.49] (A)	[D]	Cell cycle control, cell division, chromosome partitioning	Peptidase family C50	Separase GN=F7H19.150 OS=Arabidopsis thaliana (Mouse-ear cress) PE=2 SV=1	PREDICTED: uncharacterized protein LOC101501526 [Cicer arietinum]
c119300.graph_c0	0	0	28.3493	19.1374	1.06e-10		up	--	--	--	--	--	--	--	--	--
c119301.graph_c0	1.3777	1.20926	21.4908	32.383	9.2e-05	4.32947	up	Molecular Function: ribokinase activity (GO:0004747);; Biological Process: D-ribose metabolic process (GO:0006014);; Biological Process: phosphorylation (GO:0016310);;	[G]	Carbohydrate transport and metabolism	--	[G]	Carbohydrate transport and metabolism	pfkB family carbohydrate kinase	--	Sugar kinase, putative [Medicago truncatula]
c119322.graph_c0	4.13579	2.19923	11.074	14.3825	0.00708676	1.96647	up	Cellular Component: chloroplast stroma (GO:0009570);; Biological Process: stomatal complex morphogenesis (GO:0010103);; Molecular Function: hydrolase activity (GO:0016787);; Biological Process: cysteine biosynthetic process (GO:0019344);;	[Q]	Secondary metabolites biosynthesis, transport and catabolism	K01061|4.56914e-154|mtr:MTR_3g005060|Carboxymethylenebutenolidase-like protein; K01061 carboxymethylenebutenolidase [EC:3.1.1.45] (A)	[R]	General function prediction only	Dienelactone hydrolase family;; Alpha/beta hydrolase family;; Alpha/beta hydrolase family;; Prolyl oligopeptidase family	Endo-1,3;1,4-beta-D-glucanase (Precursor) OS=Zea mays (Maize) PE=1 SV=1	Carboxymethylenebutenolidase-like protein [Medicago truncatula]
c119345.graph_c0	22.2638	21.9244	4.10418	0.250556	4.25e-11	-3.54393	down	--	--	--	--	[K]	Transcription	TAZ zinc finger;; BTB/POZ domain	BTB/POZ and TAZ domain-containing protein 2 GN=BT2 OS=Arabidopsis thaliana (Mouse-ear cress) PE=1 SV=1	PREDICTED: BTB/POZ and TAZ domain-containing protein 1-like isoform X1 [Cicer arietinum]
c119352.graph_c0	15.4808	13.7756	4.62767	1.07202	5.67e-05	-2.52029	down	--	--	--	--	--	--	Cotton fibre expressed protein;; Domain of unknown function (DUF4408)	--	hypothetical protein MTR_2g039320 [Medicago truncatula]
c119391.graph_c0	1.08138	0.730131	0.0670799	0.12149	0.000425684	-3.29326	down	--	--	--	--	[R]	General function prediction only	PPR repeat;; PPR repeat family;; PPR repeat;; Pentatricopeptide repeat domain;; Phosphatidylinositol 3- and 4-kinase	Pentatricopeptide repeat-containing protein At4g16835, mitochondrial (Precursor) GN=FCAALL.441 OS=Arabidopsis thaliana (Mouse-ear cress) PE=2 SV=3	PPR containing plant-like protein [Medicago truncatula]
c119428.graph_c0	25.5531	17.5096	0.114905	1.14459	2.68e-10	-5.06003	down	--	--	--	--	--	--	--	--	--
c119461.graph_c0	13.508	9.52171	0.628445	3.98367	0.0097251	-2.29655	down	--	--	--	--	--	--	--	--	--
c119463.graph_c0	27.5877	19.9245	3.46505	2.54417	3.16e-11	-3.07188	down	Molecular Function: phospholipid binding (GO:0005543);;	--	--	--	[TU]	--	ANTH domain	Putative clathrin assembly protein At4g40080 GN=At4g40080 OS=Arabidopsis thaliana (Mouse-ear cress) PE=2 SV=2	hypothetical protein MTR_3g099670 [Medicago truncatula]
c119472.graph_c0	0	0	2.42848	3.32842	8.51e-08		up	--	--	--	--	--	--	--	--	hypothetical protein MTR_7g092550 [Medicago truncatula]
c119478.graph_c0	2.75038	2.6741	20.0638	10.5677	0.000970589	2.3758	up	Molecular Function: iron ion binding (GO:0005506);; Molecular Function: peptide deformylase activity (GO:0042586);;	[J]	Translation, ribosomal structure and biogenesis	K01462|1.5237e-126|cam:101491383|peptide deformylase 1A, chloroplastic-like; K01462 peptide deformylase [EC:3.5.1.88] (A)	[J]	Translation, ribosomal structure and biogenesis	Polypeptide deformylase	Peptide deformylase 1A, chloroplastic/mitochondrial (Precursor) OS=Arabidopsis thaliana (Mouse-ear cress) PE=1 SV=3	Formylmethionine deformylase [Medicago truncatula]
c119513.graph_c0	19.674	18.3047	82.5878	61.4989	2.26e-05	1.82546	up	--	[R]	General function prediction only	K01183|0|mtr:MTR_8g074330|Endochitinase; K01183 chitinase [EC:3.2.1.14] (A)	[R]	General function prediction only	Chitinase class I;; Chitin recognition protein	Endochitinase (Precursor) OS=Pisum sativum (Garden pea) PE=2 SV=1	RecName: Full=Endochitinase; Flags: Precursor [Pisum sativum]
c119558.graph_c0	0.678498	0.39703	4.42279	2.76642	0.00463945	2.65008	up	--	--	--	--	--	--	--	--	PREDICTED: uncharacterized protein LOC101508941 isoform X1 [Cicer arietinum]
c119569.graph_c0	0.984853	0.451014	4.50621	4.26826	0.000928781	2.55649	up	--	--	--	--	--	--	Calmodulin binding protein-like	--	calmodulin-binding protein [Medicago truncatula]
c119581.graph_c0	17.522	16.5348	7.95857	3.76786	0.000738689	-1.66495	down	Biological Process: drug transmembrane transport (GO:0006855);; Molecular Function: drug transmembrane transporter activity (GO:0015238);; Molecular Function: antiporter activity (GO:0015297);; Cellular Component: membrane (GO:0016020);;	[V]	Defense mechanisms	K03327|0|mtr:MTR_5g032720|Protein TRANSPARENT TESTA; K03327 multidrug resistance protein, MATE family (A)	[R]	General function prediction only	MatE	Protein TRANSPARENT TESTA 12 GN=F17J16_80 OS=Arabidopsis thaliana (Mouse-ear cress) PE=2 SV=1	Protein TRANSPARENT TESTA [Medicago truncatula]
c119602.graph_c0	3.00299	4.37622	40.1065	18.0243	0.00908872	2.83049	up	Molecular Function: nucleic acid binding (GO:0003676);; Molecular Function: endonuclease activity (GO:0004519);; Biological Process: DNA catabolic process (GO:0006308);;	--	--	--	--	--	S1/P1 Nuclease	Endonuclease 2 (Precursor) GN=ENDO2 OS=Arabidopsis thaliana (Mouse-ear cress) PE=1 SV=1	Nuclease S1 [Medicago truncatula]
c119606.graph_c0	0.295592	0.700522	5.72085	2.67124	0.00693445	2.91187	up	--	--	--	--	--	--	Fungal hydrophobin	--	Hydrophobin [Cordyceps militaris CM01]
c119646.graph_c0	28.7727	18.1836	1.18843	2.30614	3.02e-06	-3.77081	down	--	--	--	--	--	--	--	--	--
c119667.graph_c0	16.8762	13.5432	7.13788	5.40745	0.00865051	-1.36892	down	Molecular Function: aminoacyl-tRNA hydrolase activity (GO:0004045);; Molecular Function: protein tyrosine phosphatase activity (GO:0004725);; Biological Process: peptidyl-tyrosine dephosphorylation (GO:0035335);;	--	--	--	[S]	Function unknown	Peptidyl-tRNA hydrolase PTH2	--	hypothetical protein MTR_3g108900 [Medicago truncatula]
c119676.graph_c0	141.708	98.1249	7.30595	2.45594	3.57e-26	-4.75174	down	Cellular Component: cytoplasm (GO:0005737);; Biological Process: protein folding (GO:0006457);; Biological Process: hyperosmotic response (GO:0006972);; Biological Process: response to heat (GO:0009408);; Biological Process: response to high light intensity (GO:0009644);; Biological Process: response to hydrogen peroxide (GO:0042542);; Molecular Function: unfolded protein binding (GO:0051082);;	[O]	Posttranslational modification, protein turnover, chaperones	K13993|5.92736e-68|gmx:100500666|uncharacterized LOC100500666; K13993 HSP20 family protein (A)	[O]	Posttranslational modification, protein turnover, chaperones	Hsp20/alpha crystallin family	17.9 kDa class II heat shock protein GN=HSP17.9-D OS=Glycine max (Soybean) PE=3 SV=1	cytosolic class II small heat-shock protein [Medicago truncatula]
c119697.graph_c0	133.203	101.389	44.1257	26.6148	2.12e-05	-1.83294	down	Molecular Function: iron ion binding (GO:0005506);; Cellular Component: nucleus (GO:0005634);; Cellular Component: cytoplasm (GO:0005737);; Molecular Function: acireductone dioxygenase [iron(II)-requiring] activity (GO:0010309);; Biological Process: L-methionine salvage from methylthioadenosine (GO:0019509);; Biological Process: oxidation-reduction process (GO:0055114);;	--	--	K08967|1.37506e-118|cam:101503188|1,2-dihydroxy-3-keto-5-methylthiopentene dioxygenase 1-like; K08967 1,2-dihydroxy-3-keto-5-methylthiopentene dioxygenase [EC:1.13.11.53 1.13.11.54] (A)	[S]	Function unknown	ARD/ARD' family;; Cupin domain;; AraC-like ligand binding domain	1,2-dihydroxy-3-keto-5-methylthiopentene dioxygenase 1 {ECO:0000255|HAMAP-Rule:MF_03154} GN=VIT_05s0020g04070 OS=Vitis vinifera (Grape) PE=3 SV=1	PREDICTED: 1,2-dihydroxy-3-keto-5-methylthiopentene dioxygenase 1-like [Cicer arietinum]
c119730.graph_c0	12.566	14.2778	117.451	77.4934	6.13e-11	2.74633	up	Biological Process: proanthocyanidin biosynthetic process (GO:0010023);; Molecular Function: leucoanthocyanidin reductase activity (GO:0033788);; Biological Process: oxidation-reduction process (GO:0055114);;	--	--	K13081|0|mtr:MTR_1g093720|Leucoanthocyanidin reductase; K13081 leucoanthocyanidin reductase [EC:1.17.1.3] (A)	--	--	NmrA-like family;; NADH(P)-binding;; NAD dependent epimerase/dehydratase family	Leucoanthocyanidin reductase GN=LAR OS=Desmodium uncinatum (Spanish clover) PE=1 SV=1	leucoanthocyanidin reductase [Pisum sativum]
c119738.graph_c0	323.288	242.22	140.92	90.2315	0.00825067	-1.38972	down	Biological Process: mitochondrial transport (GO:0006839);; Cellular Component: integral component of membrane (GO:0016021);; Cellular Component: mitochondrial membrane (GO:0031966);; Biological Process: transmembrane transport (GO:0055085);;	--	--	K15104|6.97624e-180|mtr:MTR_5g032420|Mitochondrial 2-oxoglutarate/malate carrier protein; K15104 solute carrier family 25 (mitochondrial oxoglutarate transporter), member 11 (A)	[C]	Energy production and conversion	Mitochondrial carrier protein	Mitochondrial uncoupling protein 5 GN=F14M13.10 OS=Arabidopsis thaliana (Mouse-ear cress) PE=2 SV=1	Mitochondrial 2-oxoglutarate/malate carrier protein [Medicago truncatula]
c119739.graph_c0	10.0712	10.0152	30.5918	21.9711	0.00944568	1.28457	up	Biological Process: metabolic process (GO:0008152);; Molecular Function: phosphoglycolate phosphatase activity (GO:0008967);;	[R]	General function prediction only	--	[R]	General function prediction only	Haloacid dehalogenase-like hydrolase;; HAD-hyrolase-like;; haloacid dehalogenase-like hydrolase	--	PREDICTED: haloacid dehalogenase-like hydrolase domain-containing protein 3-like isoform X4 [Cicer arietinum]
c119760.graph_c0	119.101	77.1755	34.0327	10.7796	3.7e-05	-2.26429	down	--	--	--	K09286|7.12543e-70|cam:101492500|ethylene-responsive transcription factor ERF104-like; K09286 EREBP-like factor (A)	--	--	AP2 domain	Ethylene-responsive transcription factor ERF105 GN=ERF105 OS=Arabidopsis thaliana (Mouse-ear cress) PE=2 SV=1	ethylene response factor [Medicago truncatula]
c119814.graph_c0	34.5532	35.9816	3.75963	10.0297	3.29e-08	-2.38076	down	Molecular Function: zinc ion binding (GO:0008270);; Molecular Function: cinnamyl-alcohol dehydrogenase activity (GO:0045551);; Molecular Function: mannitol dehydrogenase activity (GO:0046029);; Molecular Function: sinapyl alcohol dehydrogenase activity (GO:0052747);; Biological Process: oxidation-reduction process (GO:0055114);;	[R]	General function prediction only	K00083|1.63972e-135|cam:101504284|probable mannitol dehydrogenase-like; K00083 cinnamyl-alcohol dehydrogenase [EC:1.1.1.195] (A)	[Q]	Secondary metabolites biosynthesis, transport and catabolism	Alcohol dehydrogenase GroES-like domain;; Zinc-binding dehydrogenase	Probable mannitol dehydrogenase GN=CAD1 OS=Medicago sativa (Alfalfa) PE=1 SV=1	PREDICTED: probable mannitol dehydrogenase-like [Cicer arietinum]
c119817.graph_c0	67.7702	55.7938	195.329	156.126	0.00186614	1.41942	up	Molecular Function: peroxidase activity (GO:0004601);; Biological Process: response to oxidative stress (GO:0006979);; Molecular Function: heme binding (GO:0020037);; Molecular Function: metal ion binding (GO:0046872);; Biological Process: oxidation-reduction process (GO:0055114);;	--	--	K00430|8.85371e-110|cam:101488651|peroxidase 52-like; K00430 peroxidase [EC:1.11.1.7] (A)	--	--	Peroxidase	Peroxidase 52 (Precursor) GN=K18I23.14 OS=Arabidopsis thaliana (Mouse-ear cress) PE=2 SV=1	PREDICTED: peroxidase 52-like [Cicer arietinum]
c119839.graph_c0	31.6841	27.4937	98.6102	62.1872	0.00432852	1.33618	up	Biological Process: circadian rhythm (GO:0007623);;	--	--	--	--	--	cAMP-regulated phosphoprotein/endosulfine conserved region	--	cAMP-regulated phosphoprotein-like protein [Medicago truncatula]
c119843.graph_c0	20.2406	24.1261	79.7438	85.7659	2.2e-05	1.81486	up	Biological Process: carbohydrate metabolic process (GO:0005975);; Molecular Function: glucan endo-1,3-beta-D-glucosidase activity (GO:0042973);;	--	--	--	--	--	Glycosyl hydrolases family 17	Glucan endo-1,3-beta-glucosidase, acidic isoform GI9 (Precursor) GN=PR2 OS=Nicotiana tabacum (Common tobacco) PE=1 SV=1	Endo-beta-1 3-glucanase [Medicago truncatula]
c119852.graph_c0	80.624	43.6405	7.71245	7.12712	0.000160668	-3.12857	down	--	--	--	--	--	--	Hs1pro-1 protein C-terminus;; Hs1pro-1 N-terminus	Nematode resistance protein-like HSPRO2 GN=HSPRO2 OS=Arabidopsis thaliana (Mouse-ear cress) PE=1 SV=1	Nematode resistance HS1pro1 protein [Medicago truncatula]
c119857.graph_c0	6.0295	6.38688	39.4507	34.7493	2.4e-08	2.48652	up	Molecular Function: nucleotide binding (GO:0000166);; Biological Process: flavonoid biosynthetic process (GO:0009813);; Molecular Function: oxidoreductase activity (GO:0016491);; Molecular Function: 6'-deoxychalcone synthase activity (GO:0033808);; Biological Process: oxidation-reduction process (GO:0055114);;	[R]	General function prediction only	--	[R]	General function prediction only	Aldo/keto reductase family	NAD(P)H-dependent 6&apos;-deoxychalcone synthase OS=Glycine max (Soybean) PE=1 SV=1	PREDICTED: NAD(P)H-dependent 6&apos;-deoxychalcone synthase-like [Cicer arietinum]
c119874.graph_c0	12.5411	9.32516	49.7175	39.0858	6.13e-06	1.9363	up	Biological Process: thiamine biosynthetic process (GO:0009228);; Molecular Function: iron-sulfur cluster binding (GO:0051536);;	[H]	Coenzyme transport and metabolism	K03147|0|cam:101515771|phosphomethylpyrimidine synthase, chloroplastic-like; K03147 phosphomethylpyrimidine synthase [EC:4.1.99.17] (A)	--	--	ThiC family;; ThiC-associated domain	Phosphomethylpyrimidine synthase, chloroplastic (Precursor) GN=T27A16.27 OS=Arabidopsis thaliana (Mouse-ear cress) PE=1 SV=1	PREDICTED: phosphomethylpyrimidine synthase, chloroplastic-like [Cicer arietinum]
c119887.graph_c0	72.9552	67.6639	253.876	145.425	0.0069572	1.39106	up	--	[R]	General function prediction only	--	--	--	Alpha/beta hydrolase family;; Alpha/beta hydrolase family;; alpha/beta hydrolase fold	Salicylic acid-binding protein 2 GN=SABP2 OS=Nicotiana tabacum (Common tobacco) PE=1 SV=1	methylesterase [Medicago truncatula]
c119900.graph_c0	2.93718	2.41776	9.10608	9.89534	0.0039779	1.75841	up	--	--	--	--	--	--	GDSL/SGNH-like Acyl-Esterase family found in Pmr5 and Cas1p;; PMR5 N terminal Domain	Protein trichome birefringence-like 37 GN=TBL37 OS=Arabidopsis thaliana (Mouse-ear cress) PE=2 SV=2	hypothetical protein MTR_4g087730 [Medicago truncatula]
c119943.graph_c0	19.3801	21.4604	7.59647	2.67692	1.06e-05	-2.14074	down	Molecular Function: DNA binding (GO:0003677);; Biological Process: regulation of transcription, DNA-templated (GO:0006355);;	--	--	--	--	--	No apical meristem (NAM) protein	NAC domain-containing protein 2 GN=T1N6.12 OS=Arabidopsis thaliana (Mouse-ear cress) PE=2 SV=2	PREDICTED: NAC domain-containing protein 2-like [Cicer arietinum]
c119992.graph_c0	0.0399644	0.042094	20.3518	13.3518	1.05e-22	8.57068	up	--	--	--	--	--	--	--	--	hypothetical protein MtrDRAFT_AC149129g40v2 [Medicago truncatula]
c120030.graph_c1	16.733	11.5228	5.44337	4.58935	0.00304182	-1.57184	down	Molecular Function: protein serine/threonine kinase activity (GO:0004674);; Molecular Function: ATP binding (GO:0005524);; Biological Process: protein phosphorylation (GO:0006468);;	[RTKL]	--	--	[T]	Signal transduction mechanisms	Protein kinase domain;; Protein tyrosine kinase	Putative serine/threonine-protein kinase {ECO:0000250|UniProtKB:Q9FE20, ECO:0000303|Ref.2} (Fragment) OS=Helianthus annuus (Common sunflower) PE=1 SV=1	receptor-like kinase [Medicago truncatula]
c120077.graph_c0	26.9449	19.5385	6.87893	3.70791	0.00529454	-2.24279	down	Molecular Function: nucleic acid binding (GO:0003676);;	--	--	--	--	--	--	--	hypothetical protein glysoja_036672 [Glycine soja]
c120147.graph_c0	0	0	7.439	6.08873	7.85e-11		up	--	--	--	--	--	--	--	--	--
c120151.graph_c0	0	0.147276	2.60468	1.16403	0.000568595	4.46555	up	Molecular Function: protein serine/threonine phosphatase activity (GO:0004722);; Biological Process: metabolic process (GO:0008152);;	[T]	Signal transduction mechanisms	--	[T]	Signal transduction mechanisms	Protein phosphatase 2C	Probable protein phosphatase 2C 65 GN=At5g01700 OS=Arabidopsis thaliana (Mouse-ear cress) PE=2 SV=1	PREDICTED: probable protein phosphatase 2C 65-like [Cicer arietinum]
c120157.graph_c0	19.8666	13.9247	6.9579	6.24786	0.00447759	-1.43011	down	Molecular Function: serine-type endopeptidase activity (GO:0004252);; Biological Process: proteolysis (GO:0006508);; Cellular Component: plasmodesma (GO:0009506);; Cellular Component: integral component of membrane (GO:0016021);;	--	--	--	[T]	Signal transduction mechanisms	Rhomboid family	Putative non-specific lipid-transfer protein 14 (Precursor) GN=LTP14 OS=Arabidopsis thaliana (Mouse-ear cress) PE=3 SV=2	hypothetical protein PHAVU_007G067300g [Phaseolus vulgaris]
c120165.graph_c0	2.21879	1.48311	0.0516134	0.0934781	1.71e-06	-4.70207	down	--	--	--	--	--	--	--	--	--
c120209.graph_c0	20.5922	21.5765	72.2611	70.1361	0.000961137	1.66976	up	--	--	--	--	--	--	--	--	hypothetical protein CICLE_v10029531mg [Citrus clementina]
c120211.graph_c0	0.143429	0	2.34217	4.32051	0.00518235	5.57768	up	Cellular Component: cytoplasm (GO:0005737);; Molecular Function: zinc ion binding (GO:0008270);; Molecular Function: oxidoreductase activity (GO:0016491);; Biological Process: oxidation-reduction process (GO:0055114);;	[C]	Energy production and conversion	K00121|6.3638e-126|mtr:MTR_5g087710|Alcohol dehydrogenase-like protein; K00121 S-(hydroxymethyl)glutathione dehydrogenase / alcohol dehydrogenase [EC:1.1.1.284 1.1.1.1] (A)	[Q]	Secondary metabolites biosynthesis, transport and catabolism	Alcohol dehydrogenase GroES-like domain	Alcohol dehydrogenase-like 7 GN=At5g42250 OS=Arabidopsis thaliana (Mouse-ear cress) PE=2 SV=1	Alcohol dehydrogenase-like protein [Medicago truncatula]
c120215.graph_c0	7.54731	3.94842	0	0	8.97e-09		down	--	--	--	--	--	--	--	--	--
c120228.graph_c0	0	0	1.32945	0.69224	2.5e-07		up	Molecular Function: protein tyrosine kinase activity (GO:0004713);; Molecular Function: ATP binding (GO:0005524);; Biological Process: protein phosphorylation (GO:0006468);;	[RTKL]	--	--	[T]	Signal transduction mechanisms	Protein kinase domain;; Protein tyrosine kinase	Inactive protein kinase SELMODRAFT_444075 GN=SELMODRAFT_444075 OS=Selaginella moellendorffii (Spikemoss) PE=2 SV=1	Somatic embryogenesis receptor kinase [Medicago truncatula]
c120232.graph_c0	1.98144	1.00177	0	0.173635	0.000854021	-4.03365	down	--	--	--	K03294|3.61533e-17|cam:101507364|cationic amino acid transporter 1-like; K03294 basic amino acid/polyamine antiporter, APA family (A)	[R]	General function prediction only	--	--	Copia protein, partial [Glycine soja]
c120253.graph_c0	0.50316	0.378551	4.86905	3.89744	0.00026293	3.2287	up	Molecular Function: oxidoreductase activity (GO:0016491);; Biological Process: oxidation-reduction process (GO:0055114);;	[IQR]	--	--	[Q]	Secondary metabolites biosynthesis, transport and catabolism	short chain dehydrogenase;; KR domain;; NAD dependent epimerase/dehydratase family	Short-chain dehydrogenase TIC 32, chloroplastic GN=TIC32 OS=Pisum sativum (Garden pea) PE=1 SV=1	hypothetical protein PHAVU_004G112100g [Phaseolus vulgaris]
c120270.graph_c0	0.897236	0.690611	3.84034	4.80069	0.00802991	2.38706	up	--	--	--	--	--	--	Helix-loop-helix DNA-binding domain	Transcription factor bHLH69 GN=F6I18.110 OS=Arabidopsis thaliana (Mouse-ear cress) PE=2 SV=2	Transcription factor bHLH66 [Medicago truncatula]
c120287.graph_c0	1.2446	0.773105	0	0.174783	0.000194029	-3.46784	down	--	--	--	--	--	--	--	--	--
c120313.graph_c0	1.44695	1.49684	11.0954	11.4061	5.04e-07	2.8526	up	Cellular Component: membrane (GO:0016020);;	--	--	--	--	--	EamA-like transporter family	WAT1-related protein At1g25270 GN=At1g25270 OS=Arabidopsis thaliana (Mouse-ear cress) PE=2 SV=1	Auxin-induced protein 5NG4 [Medicago truncatula]
c120370.graph_c0	0.0267666	0	2.03977	3.577	9.42e-05	7.75021	up	--	--	--	--	--	--	--	--	--
c120411.graph_c0	0.285381	0.200392	5.86844	7.81504	2.98e-06	4.76661	up	--	--	--	--	--	--	--	--	--
c120420.graph_c0	0.0745517	0.392622	11.2724	4.8181	0.000423023	4.91653	up	Molecular Function: carboxylic ester hydrolase activity (GO:0004091);; Cellular Component: extracellular region (GO:0005576);; Biological Process: lipid metabolic process (GO:0006629);; Molecular Function: lipase activity (GO:0016298);;	--	--	--	--	--	GDSL-like Lipase/Acylhydrolase	GDSL esterase/lipase At1g28610 (Precursor) GN=At1g28610 OS=Arabidopsis thaliana (Mouse-ear cress) PE=2 SV=2	GDSL esterase/lipase [Medicago truncatula]
c120453.graph_c0	0.120021	0.0632085	3.6295	6.57347	0.00146595	5.77958	up	--	--	--	--	--	--	ENT domain	--	--
c120460.graph_c0	0.105717	0.11135	1.4578	1.06537	0.000304312	3.43453	up	--	--	--	K09338|0|cam:101495692|homeobox-leucine zipper protein ATHB-14-like; K09338 homeobox-leucine zipper protein (A)	--	--	MEKHLA domain;; START domain	Homeobox-leucine zipper protein HOX32 GN=B1394A07.10 OS=Oryza sativa subsp. japonica (Rice) PE=2 SV=1	PREDICTED: homeobox-leucine zipper protein ATHB-14-like [Cicer arietinum]
c120490.graph_c0	10.9574	3.16012	31.8735	26.339	0.000105164	1.99523	up	--	--	--	--	[O]	Posttranslational modification, protein turnover, chaperones	Xylanase inhibitor N-terminal;; Xylanase inhibitor C-terminal;; Eukaryotic aspartyl protease	Protein ASPARTIC PROTEASE IN GUARD CELL 2 (Precursor) GN=ASPG2 OS=Arabidopsis thaliana (Mouse-ear cress) PE=2 SV=1	PREDICTED: protein ASPARTIC PROTEASE IN GUARD CELL 2-like [Cicer arietinum]
c120511.graph_c0	13.2417	9.54293	2.30722	3.3349	2.75e-05	-2.0591	down	Biological Process: response to stress (GO:0006950);; Cellular Component: chloroplast thylakoid membrane (GO:0009535);; Biological Process: abscisic acid biosynthetic process (GO:0009688);; Molecular Function: 9-cis-epoxycarotenoid dioxygenase activity (GO:0045549);; Molecular Function: metal ion binding (GO:0046872);; Biological Process: oxidation-reduction process (GO:0055114);;	[Q]	Secondary metabolites biosynthesis, transport and catabolism	K09840|0|cam:101492033|9-cis-epoxycarotenoid dioxygenase NCED1, chloroplastic-like; K09840 9-cis-epoxycarotenoid dioxygenase [EC:1.13.11.51] (A)	[Q]	Secondary metabolites biosynthesis, transport and catabolism	Retinal pigment epithelial membrane protein	9-cis-epoxycarotenoid dioxygenase NCED1, chloroplastic (Precursor) GN=NCED1 OS=Phaseolus vulgaris (Kidney bean) PE=2 SV=1	nine-cis-epoxycarotenoid dioxygenase2 [Pisum sativum]
c120526.graph_c0	14.0946	9.03044	3.05022	3.89611	0.00128698	-1.78352	down	Cellular Component: plasma membrane (GO:0005886);; Biological Process: response to chitin (GO:0010200);; Molecular Function: metal ion binding (GO:0046872);;	--	--	--	[P]	Inorganic ion transport and metabolism	Heavy-metal-associated domain	Heavy metal-associated isoprenylated plant protein 26 (Precursor) GN=F20M13.140 OS=Arabidopsis thaliana (Mouse-ear cress) PE=1 SV=1	heavy metal-associated domain protein, partial [Medicago truncatula]
c120549.graph_c0	0.0716949	0	6.33082	6.51828	5.58e-09	7.48948	up	--	--	--	--	--	--	--	--	hypothetical protein MTR_4g078190 [Medicago truncatula]
c120596.graph_c0	1.8532	1.08859	0.0431089	0.312302	0.00120019	-3.01487	down	--	--	--	--	--	--	--	--	--
c120599.graph_c0	1.90633	1.80092	0.0237725	0.624297	0.00640009	-2.48054	down	Molecular Function: protein serine/threonine kinase activity (GO:0004674);; Molecular Function: calcium ion binding (GO:0005509);; Molecular Function: ATP binding (GO:0005524);; Biological Process: protein phosphorylation (GO:0006468);;	[RTKL]	--	K13412|0|cam:101502089|calcium-dependent protein kinase 17-like; K13412 calcium-dependent protein kinase [EC:2.7.11.1] (A)	[T]	Signal transduction mechanisms	EF hand;; EF-hand domain pair;; EF-hand domain pair;; EF-hand domain;; EF hand;; Protein kinase domain;; Cytoskeletal-regulatory complex EF hand;; Ca2+ insensitive EF hand;; Toprim-like;; Secreted protein acidic and rich in cysteine Ca binding region;; Protein kinase domain;; Protein tyrosine kinase;; Kinase-like	Calcium-dependent protein kinase 17 GN=CPK17 OS=Arabidopsis thaliana (Mouse-ear cress) PE=2 SV=1	PREDICTED: calcium-dependent protein kinase 17-like [Cicer arietinum]
c120608.graph_c0	0	0.0800074	22.4193	10.0678	1.41e-07	8.45386	up	--	--	--	--	--	--	--	--	--
c120633.graph_c0	36.5934	36.0356	20.5355	11.4242	0.00681439	-1.30316	down	--	--	--	--	[R]	General function prediction only	Kelch motif;; Kelch motif;; Galactose oxidase, central domain;; F-box domain;; Galactose oxidase, central domain;; Kelch motif	F-box/kelch-repeat protein OR23 GN=OR23 OS=Arabidopsis thaliana (Mouse-ear cress) PE=2 SV=1	PREDICTED: F-box/kelch-repeat protein OR23-like isoform X1 [Cicer arietinum]
c120648.graph_c0	3.05817	2.38987	18.0188	11.3193	5.68e-06	2.32705	up	Biological Process: metabolic process (GO:0008152);; Molecular Function: transferase activity, transferring hexosyl groups (GO:0016758);;	--	--	K08237|6.65043e-175|mtr:MTR_1g019510|UDP-glycosyltransferase; K08237 hydroquinone glucosyltransferase [EC:2.4.1.218] (A)	[GC]	--	UDP-glucoronosyl and UDP-glucosyl transferase	Hydroquinone glucosyltransferase GN=AS OS=Rauvolfia serpentina (Serpentine wood) PE=1 SV=1	UDP-glycosyltransferase [Medicago truncatula]
c120672.graph_c0	1.72283	1.07093	0.0341633	0.433118	0.00717133	-2.53613	down	--	--	--	--	[R]	General function prediction only	--	--	PREDICTED: uncharacterized protein LOC102660513 [Glycine max]
c120696.graph_c0	2.94401	3.98686	0.190775	1.18052	0.00644157	-2.3412	down	--	--	--	--	--	--	F-box domain;; F-box-like	F-box/kelch-repeat protein At3g06240 GN=At3g06240 OS=Arabidopsis thaliana (Mouse-ear cress) PE=2 SV=1	F-box protein interaction domain; Galactose oxidase, central [Medicago truncatula]
c120699.graph_c0	1.42847	1.04865	9.00602	10.384	8.28e-05	2.90827	up	Molecular Function: nucleotide binding (GO:0000166);; Molecular Function: translation initiation factor activity (GO:0003743);; Biological Process: translational initiation (GO:0006413);;	[R]	General function prediction only	K13126|0|cam:101515641|probable polyadenylate-binding protein At2g36660-like; K13126 polyadenylate-binding protein (A)	[AJ]	--	RNA recognition motif. (a.k.a. RRM, RBD, or RNP domain);; RNA recognition motif (a.k.a. RRM, RBD, or RNP domain);; RNA recognition motif. (a.k.a. RRM, RBD, or RNP domain);; RNA binding motif	Polyadenylate-binding protein 7 GN=PAB7 OS=Arabidopsis thaliana (Mouse-ear cress) PE=2 SV=1	PREDICTED: probable polyadenylate-binding protein At2g36660-like [Cicer arietinum]
c120710.graph_c1	8.45809	6.92906	0	0.257357	7.4e-07	-5.85166	down	--	--	--	--	--	--	--	--	F-box/FBD/LRR-repeat protein [Medicago truncatula]
c120726.graph_c0	0.891708	0.488397	9.92337	7.69689	8.96e-07	3.59991	up	Molecular Function: ATP binding (GO:0005524);; Cellular Component: cytoplasm (GO:0005737);; Molecular Function: poly(U) RNA binding (GO:0008266);; Biological Process: phosphorylation (GO:0016310);; Molecular Function: glucuronokinase activity (GO:0047940);;	--	--	K16190|0|cam:101503341|glucuronokinase 1-like; K16190 glucuronokinase [EC:2.7.1.43] (A)	--	--	GHMP kinases N terminal domain;; GHMP kinases C terminal	Glucuronokinase 1 GN=GLCAK1 OS=Arabidopsis thaliana (Mouse-ear cress) PE=1 SV=1	unknown [Medicago truncatula]
c120732.graph_c0	0.295312	0.0888709	1.73504	1.70982	0.00118035	3.12613	up	Molecular Function: DNA binding (GO:0003677);; Biological Process: regulation of transcription, DNA-templated (GO:0006355);;	--	--	--	--	--	--	NAC transcription factor 29 GN=At1g69490 OS=Arabidopsis thaliana (Mouse-ear cress) PE=2 SV=1	NAC domain-containing protein [Medicago truncatula]
c120747.graph_c0	1.14998	1.29778	47.8916	40.3995	2.68e-17	5.0747	up	--	--	--	--	--	--	--	--	--
c120763.graph_c0	34.1222	25.205	5.7088	15.2178	0.00907813	-1.51539	down	Molecular Function: ATP binding (GO:0005524);; Molecular Function: kinase activity (GO:0016301);; Biological Process: phosphorylation (GO:0016310);;	--	--	--	--	--	Zeta toxin;; AAA domain;; AAA domain	--	hypothetical protein MTR_1g075260 [Medicago truncatula]
c120784.graph_c0	3.80642	3.17714	0.130311	0.354013	2.58e-05	-3.86597	down	Molecular Function: DNA binding (GO:0003677);;	[L]	Replication, recombination and repair	K10706|4.32184e-75|mtr:MTR_5g076330|DNA-binding protein SMUBP-2; K10706 senataxin [EC:3.6.4.-] (A)	[A]	RNA processing and modification	AAA domain;; PAP2 superfamily	Phosphatidylcholine:diacylglycerol cholinephosphotransferase 1 GN=ROD1 OS=Arabidopsis thaliana (Mouse-ear cress) PE=1 SV=1	P-loop nucleoside triphosphate hydrolase superfamily protein [Medicago truncatula]
c120784.graph_c1	2.24198	1.99534	0.0630685	0.285562	3.55e-05	-3.60028	down	Molecular Function: DNA binding (GO:0003677);;	[L]	Replication, recombination and repair	K10706|0|mtr:MTR_5g076330|DNA-binding protein SMUBP-2; K10706 senataxin [EC:3.6.4.-] (A)	[A]	RNA processing and modification	AAA domain;; AAA domain;; AAA domain;; Part of AAA domain	Probable helicase MAGATAMA 3 GN=MAA3 OS=Arabidopsis thaliana (Mouse-ear cress) PE=2 SV=1	DNA-binding protein SMUBP-2 [Medicago truncatula]
c120793.graph_c0	35.7415	25.9189	6.22677	5.61736	8.33e-09	-2.45586	down	Molecular Function: ATP binding (GO:0005524);; Biological Process: defense response (GO:0006952);; Biological Process: signal transduction (GO:0007165);; Molecular Function: nucleoside-triphosphatase activity (GO:0017111);; Molecular Function: ADP binding (GO:0043531);;	--	--	--	--	--	NB-ARC domain;; AAA ATPase domain;; NACHT domain;; TIR domain;; TIR domain;; NB-ARC domain	TMV resistance protein N GN=N OS=Nicotiana glutinosa (Tobacco) PE=1 SV=1	Resistance protein [Medicago truncatula]
c120807.graph_c0	0.0594533	0.0939321	11.5065	10.1594	2.86e-18	7.03372	up	--	--	--	--	--	--	--	--	--
c120857.graph_c0	3.91874	3.46609	31.5708	22.2606	9.14e-10	2.76617	up	--	[M]	Cell wall/membrane/envelope biogenesis	--	--	--	Glycosyl hydrolases family 28;; Pectate lyase superfamily protein	Probable polygalacturonase OS=Vitis vinifera (Grape) PE=1 SV=1	polygalacturonase/glycoside hydrolase family protein [Medicago truncatula]
c120862.graph_c0	1.30858	0.721973	0	0.0682571	5.52e-06	-4.82894	down	--	--	--	--	--	--	Protein tyrosine kinase;; Protein kinase domain;; Leucine rich repeat N-terminal domain;; Leucine Rich Repeat	Probably inactive leucine-rich repeat receptor-like protein kinase At5g48380 (Precursor) GN=At5g48380 OS=Arabidopsis thaliana (Mouse-ear cress) PE=1 SV=1	LRR receptor-like kinase family protein, putative [Medicago truncatula]
c120896.graph_c0	1.29139	0.510076	8.0057	9.01786	2.81e-05	3.20177	up	--	--	--	--	--	--	--	--	--
c120900.graph_c0	5.3864	3.98055	1.57633	0	0.00240297	-2.77655	down	--	--	--	--	--	--	--	--	--
c120903.graph_c0	116.878	121.849	10.714	28.5159	9.37e-10	-2.63147	down	--	--	--	--	--	--	BURP domain	Polygalacturonase non-catalytic subunit AroGP2 (Precursor) GN=GP2 OS=Solanum lycopersicum (Tomato) PE=3 SV=1	polygalacturonase non-catalytic protein [Medicago truncatula]
c120907.graph_c0	22.2089	28.1508	5.41878	3.6179	1.34e-06	-2.59614	down	--	[O]	Posttranslational modification, protein turnover, chaperones	K00799|1.47523e-105|gmx:547587|glutathione S-transferase GST 19; K00799 glutathione S-transferase [EC:2.5.1.18] (A)	[O]	Posttranslational modification, protein turnover, chaperones	Glutathione S-transferase, N-terminal domain;; Glutathione S-transferase, N-terminal domain;; Glutathione S-transferase, N-terminal domain;; Glutathione S-transferase, C-terminal domain;; Glutathione S-transferase, C-terminal domain	Glutathione S-transferase U7 GN=F16P2.20 OS=Arabidopsis thaliana (Mouse-ear cress) PE=2 SV=1	glutathione S-transferase [Medicago truncatula]
c120911.graph_c0	22.3352	15.9426	6.51304	6.40038	0.00034784	-1.63714	down	--	--	--	--	--	--	Plant protein of unknown function (DUF946);; Plant protein of unknown function (DUF946)	--	DUF946 family protein [Medicago truncatula]
c120939.graph_c0	0.316519	0.666771	4.02011	3.55378	0.00261141	2.82646	up	--	--	--	--	--	--	--	Probable membrane-associated kinase regulator 2 GN=MAKR2 OS=Arabidopsis thaliana (Mouse-ear cress) PE=2 SV=1	hypothetical protein MTR_5g009870 [Medicago truncatula]
c120949.graph_c0	1.12365	0.897849	16.8727	12.2659	3.11e-09	3.75588	up	Molecular Function: oxidoreductase activity, acting on paired donors, with incorporation or reduction of molecular oxygen, 2-oxoglutarate as one donor, and incorporation of one atom each of oxygen into both donors (GO:0016706);; Biological Process: oxidation-reduction process (GO:0055114);;	[R]	General function prediction only	--	[QR]	--	2OG-Fe(II) oxygenase superfamily;; non-haem dioxygenase in morphine synthesis N-terminal	Protein SRG1 GN=SRG1 OS=Arabidopsis thaliana (Mouse-ear cress) PE=2 SV=1	2OG-Fe(II) oxygenase family oxidoreductase [Medicago truncatula]
c120990.graph_c0	0	0	22.2712	17.2376	2.91e-11		up	--	--	--	--	--	--	--	--	--
c121003.graph_c0	1.88879	2.53201	34.6446	28.8525	5.37e-15	3.73853	up	Molecular Function: nucleotide binding (GO:0000166);; Biological Process: anthocyanin-containing compound biosynthetic process (GO:0009718);; Biological Process: response to sucrose (GO:0009744);; Biological Process: response to UV-B (GO:0010224);; Cellular Component: extrinsic component of endoplasmic reticulum membrane (GO:0042406);; Biological Process: cellular metabolic process (GO:0044237);;…	[MG]	--	K13082|0|mtr:MTR_124s0002|Dihydroflavonol reductase; K13082 bifunctional dihydroflavonol 4-reductase/flavanone 4-reductase [EC:1.1.1.219 1.1.1.234] (A)	[V]	Defense mechanisms	NAD dependent epimerase/dehydratase family;; 3-beta hydroxysteroid dehydrogenase/isomerase family;; NADH(P)-binding;; Male sterility protein;; NmrA-like family;; short chain dehydrogenase;; KR domain	Bifunctional dihydroflavonol 4-reductase/flavanone 4-reductase GN=DFR OS=Malus domestica (Apple) PE=1 SV=1	Dihydroflavonol reductase [Medicago truncatula]
c121011.graph_c1	0.459373	0.887062	7.40889	4.02552	0.00146998	2.93952	up	--	--	--	--	--	--	--	--	PREDICTED: uncharacterized protein LOC101505256 [Cicer arietinum]
c121024.graph_c1	0.0374286	0	2.94283	2.00894	4.05e-08	7.02502	up	--	--	--	--	--	--	--	--	--
c121087.graph_c0	72.2534	62.7592	28.746	25.2323	0.0020208	-1.40742	down	--	--	--	--	--	--	--	NAC domain-containing protein 72 GN=F27G19.10 OS=Arabidopsis thaliana (Mouse-ear cress) PE=2 SV=1	NAC transcription factor-like protein [Medicago truncatula]
c121141.graph_c0	22.3834	19.4437	8.85273	7.60346	0.00336572	-1.432	down	--	--	--	--	--	--	--	Protein XRI1 GN=XRI1 OS=Arabidopsis thaliana (Mouse-ear cress) PE=1 SV=2	Glutamate decarboxylase [Medicago truncatula]
c121144.graph_c0	29.2155	18.4035	9.27879	5.18674	0.000677011	-1.81946	down	Biological Process: response to stimulus (GO:0050896);;	--	--	--	--	--	--	--	hypothetical protein MTR_8g101480 [Medicago truncatula]
c121241.graph_c0	8.50039	6.6199	3.05845	1.66177	0.00580709	-1.7903	down	Molecular Function: protein serine/threonine kinase activity (GO:0004674);; Molecular Function: ATP binding (GO:0005524);; Biological Process: protein phosphorylation (GO:0006468);;	[RTKL]	--	--	[T]	Signal transduction mechanisms	Protein kinase domain;; Protein tyrosine kinase	Probable receptor-like protein kinase At1g11050 (Precursor) GN=At1g11050 OS=Arabidopsis thaliana (Mouse-ear cress) PE=2 SV=1	receptor-like kinase plant-like protein, putative [Medicago truncatula]
c121249.graph_c0	30.6304	22.8805	10.2881	7.57493	0.000153791	-1.67287	down	Molecular Function: protein binding (GO:0005515);;	--	--	--	[Z]	Cytoskeleton	--	Dynein 8 kDa light chain, flagellar outer arm OS=Chlamydomonas reinhardtii (Chlamydomonas smithii) PE=1 SV=1	dynein light chain [Vicia faba]
c121279.graph_c0	0.747516	0.699865	16.1251	6.77798	0.00344132	3.85076	up	--	--	--	--	--	--	--	--	PREDICTED: uncharacterized protein LOC101490666 isoform X1 [Cicer arietinum]
c121295.graph_c0	2.9654	1.95214	0	0	4.21e-08		down	--	--	--	--	[R]	General function prediction only	--	Endonuclease OS=Nicotiana tabacum (Common tobacco) PE=2 SV=1	hypothetical protein VITISV_001550 [Vitis vinifera]
c121315.graph_c0	75.6061	51.8189	32.1246	16.732	0.000837341	-1.49118	down	Biological Process: MAPK cascade (GO:0000165);; Biological Process: respiratory burst involved in defense response (GO:0002679);; Molecular Function: SNAP receptor activity (GO:0005484);; Cellular Component: trans-Golgi network (GO:0005802);; Cellular Component: plasma membrane (GO:0005886);; Biological Process: regulation of transcription, DNA-templated (GO:0006355);; Biological Process: nucleot…	--	--	K08486|5.90462e-94|cam:101501493|syntaxin-121-like; K08486 syntaxin 1B/2/3 (A)	[U]	Intracellular trafficking, secretion, and vesicular transport	Syntaxin;; SNARE domain	Syntaxin-121 GN=F26K24.11 OS=Arabidopsis thaliana (Mouse-ear cress) PE=1 SV=1	PREDICTED: syntaxin-121-like [Cicer arietinum]
c121327.graph_c0	1.42646	1.20931	0	0.0381103	4.99e-07	-6.06314	down	--	--	--	--	--	--	--	--	PREDICTED: uncharacterized protein LOC101514111 [Cicer arietinum]
c121344.graph_c0	45.4573	34.7458	18.0507	11.6377	0.000570231	-1.53315	down	Cellular Component: plasma membrane (GO:0005886);; Cellular Component: chloroplast (GO:0009507);;	--	--	--	[L]	Replication, recombination and repair	DDE superfamily endonuclease;; Plant transposon protein	--	hypothetical protein MTR_1g015070 [Medicago truncatula]
c121395.graph_c0	3.63125	3.38343	14.1487	17.9758	0.000782691	2.13139	up	Molecular Function: 3-hydroxyacyl-CoA dehydrogenase activity (GO:0003857);; Cellular Component: peroxisome (GO:0005777);; Biological Process: fatty acid metabolic process (GO:0006631);; Biological Process: membrane fusion (GO:0006944);; Molecular Function: 3-hydroxybutyryl-CoA dehydrogenase activity (GO:0008691);; Biological Process: photorespiration (GO:0009853);; Biological Process: response to…	[I]	Lipid transport and metabolism	K00074|1.21482e-154|mtr:MTR_8g061230|3-hydroxybutyryl-CoA dehydrogenase-like protein; K00074 3-hydroxybutyryl-CoA dehydrogenase [EC:1.1.1.157] (A)	[I]	Lipid transport and metabolism	3-hydroxyacyl-CoA dehydrogenase, NAD binding domain;; 3-hydroxyacyl-CoA dehydrogenase, C-terminal domain;; NAD binding domain of 6-phosphogluconate dehydrogenase	3-hydroxyacyl-CoA dehydrogenase GN=AIM1 OS=Arabidopsis thaliana (Mouse-ear cress) PE=1 SV=1	3-hydroxybutyryl-CoA dehydrogenase-like protein [Medicago truncatula]
c121433.graph_c0	0.388412	0.572754	7.2354	5.10553	0.000137259	3.56233	up	Cellular Component: vacuolar membrane (GO:0005774);; Biological Process: drug transmembrane transport (GO:0006855);; Biological Process: fruit ripening (GO:0009835);; Molecular Function: drug transmembrane transporter activity (GO:0015238);; Molecular Function: antiporter activity (GO:0015297);;	--	--	K03327|2.27512e-37|mtr:MTR_1g021740|Protein TRANSPARENT TESTA; K03327 multidrug resistance protein, MATE family (A)	[R]	General function prediction only	MatE	Protein TRANSPARENT TESTA 12 GN=F17J16_80 OS=Arabidopsis thaliana (Mouse-ear cress) PE=2 SV=1	MATE efflux family protein [Medicago truncatula]
c121435.graph_c0	49.9048	52.709	13.1435	4.26874	2.68e-10	-2.71096	down	Molecular Function: transporter activity (GO:0005215);; Biological Process: oligopeptide transport (GO:0006857);; Cellular Component: membrane (GO:0016020);;	[E]	Amino acid transport and metabolism	--	[E]	Amino acid transport and metabolism	POT family	Protein NRT1/ PTR FAMILY 3.1 GN=F24J5.19 OS=Arabidopsis thaliana (Mouse-ear cress) PE=2 SV=1	Peptide transporter PTR [Medicago truncatula]
c121441.graph_c0	92.283	65.7528	31.7402	26.1263	0.000651895	-1.53037	down	--	--	--	K13422|0|mtr:MTR_5g030430|BHLH transcription factor; K13422 transcription factor MYC2 (A)	--	--	bHLH-MYC and R2R3-MYB transcription factors N-terminal;; Helix-loop-helix DNA-binding domain;; bHLH-MYC and R2R3-MYB transcription factors N-terminal	Transcription factor MYC2 GN=At1g32640 OS=Arabidopsis thaliana (Mouse-ear cress) PE=1 SV=2	G-box element binding protein [Pisum sativum]
c121458.graph_c0	0	0	3.36717	3.65901	1.36e-09		up	--	--	--	--	--	--	--	--	--
c121462.graph_c0	0.308327	0.144336	2.90078	2.32663	0.000273987	3.46311	up	--	--	--	--	[R]	General function prediction only	Protein of unknown function, DUF607	Calcium uniporter protein 4, mitochondrial (Precursor) OS=Arabidopsis thaliana (Mouse-ear cress) PE=2 SV=1	PPR containing plant-like protein [Medicago truncatula]
c121478.graph_c0	27.8334	21.0111	59.0465	63.2645	0.00887376	1.25813	up	Biological Process: carbohydrate transport (GO:0008643);; Cellular Component: integral component of membrane (GO:0016021);; Molecular Function: substrate-specific transmembrane transporter activity (GO:0022891);; Molecular Function: 2-alkenal reductase [NAD(P)] activity (GO:0032440);; Biological Process: transmembrane transport (GO:0055085);; Biological Process: oxidation-reduction process (GO:00…	[GEPR]	--	--	[R]	General function prediction only	Sugar (and other) transporter;; Major Facilitator Superfamily	Sugar transport protein 13 GN=F9D12.17 OS=Arabidopsis thaliana (Mouse-ear cress) PE=1 SV=2	Hexose transporter [Medicago truncatula]
c121479.graph_c0	123.956	88.2534	9.7934	14.2486	5.91e-14	-3.18631	down	--	--	--	--	--	--	Hs1pro-1 protein C-terminus;; Hs1pro-1 N-terminus	Nematode resistance protein-like HSPRO2 GN=HSPRO2 OS=Arabidopsis thaliana (Mouse-ear cress) PE=1 SV=1	putative Hs1pro-1 homolog [Pisum sativum]
c121510.graph_c0	31.2808	40.3552	14.3262	12.5243	0.00331075	-1.51684	down	Cellular Component: ribosome (GO:0005840);; Biological Process: purine nucleotide biosynthetic process (GO:0006164);; Biological Process: pyrimidine ribonucleotide biosynthetic process (GO:0009220);;	--	--	K17408|0|cam:101493213|uncharacterized LOC101493213; K17408 small subunit ribosomal protein S29 (A)	[J]	Translation, ribosomal structure and biogenesis	Mitochondrial ribosomal death-associated protein 3	--	PREDICTED: uncharacterized protein LOC101493213 isoform X2 [Cicer arietinum]
c121588.graph_c0	26.6518	24.4739	7.48685	7.96535	0.00015719	-1.80082	down	--	--	--	--	--	--	--	--	unknown [Medicago truncatula]
c121593.graph_c1	0	0.0620253	8.54775	6.45043	2.09e-10	7.73795	up	--	--	--	--	--	--	--	--	--
c121598.graph_c0	13.459	6.37736	0.13236	0.71916	0.000229721	-4.50794	down	--	[O]	Posttranslational modification, protein turnover, chaperones	--	[O]	Posttranslational modification, protein turnover, chaperones	--	Katanin p60 ATPase-containing subunit A1 {ECO:0000255|HAMAP-Rule:MF_03023} GN=At1g80350 OS=Arabidopsis thaliana (Mouse-ear cress) PE=1 SV=1	PREDICTED: uncharacterized protein LOC101498262 [Cicer arietinum]
c121607.graph_c0	14.8424	17.5145	1.98658	0.921971	2.23e-13	-3.61274	down	--	--	--	--	--	--	--	--	PREDICTED: uncharacterized protein LOC101497905 [Cicer arietinum]
c121620.graph_c0	0.281906	0.415699	2.59159	2.65564	0.0029632	2.815	up	Biological Process: sister chromatid cohesion (GO:0007062);; Biological Process: reciprocal meiotic recombination (GO:0007131);; Biological Process: regulation of chromosome organization (GO:0033044);; Biological Process: meiotic DNA double-strand break formation (GO:0042138);; Biological Process: meiotic chromosome segregation (GO:0045132);;	--	--	--	[R]	General function prediction only	PPR repeat;; PPR repeat family;; PPR repeat;; Pentatricopeptide repeat domain	Pentatricopeptide repeat-containing protein At5g59600 GN=PCMP-E1 OS=Arabidopsis thaliana (Mouse-ear cress) PE=2 SV=1	PREDICTED: pentatricopeptide repeat-containing protein At5g59600-like [Cicer arietinum]
c121631.graph_c0	30.8609	24.1865	12.4197	9.38837	0.0028337	-1.42607	down	Biological Process: cation transport (GO:0006812);; Molecular Function: cation transmembrane transporter activity (GO:0008324);; Cellular Component: integral component of membrane (GO:0016021);; Biological Process: transmembrane transport (GO:0055085);;	[P]	Inorganic ion transport and metabolism	--	[P]	Inorganic ion transport and metabolism	Cation efflux family	Metal tolerance protein 4 OS=Oryza sativa subsp. japonica (Rice) PE=2 SV=1	Metal tolerance protein [Medicago truncatula]
c121645.graph_c0	49.8855	68.3135	14.2778	11.5514	0.000464077	-2.30264	down	Molecular Function: catalytic activity (GO:0003824);; Biological Process: metabolic process (GO:0008152);; Biological Process: response to karrikin (GO:0080167);;	--	--	K06617|0|cam:101513461|probable galactinol--sucrose galactosyltransferase 2-like; K06617 raffinose synthase [EC:2.4.1.82] (A)	--	--	Raffinose synthase or seed imbibition protein Sip1	Probable galactinol--sucrose galactosyltransferase 2 GN=T8H10.120 OS=Arabidopsis thaliana (Mouse-ear cress) PE=2 SV=2	alkaline alpha-galactosidase [Pisum sativum]
c121656.graph_c0	0.17902	0	3.68128	2.74534	2.03e-06	5.14888	up	--	--	--	--	--	--	--	--	PREDICTED: uncharacterized protein LOC101507098 [Cicer arietinum]
c121721.graph_c0	77.7742	51.9574	20.1724	22.3816	0.000100326	-1.66718	down	--	--	--	--	--	--	Protein of unknown function (DUF569);; Fascin domain	--	PREDICTED: uncharacterized protein LOC101489362 [Cicer arietinum]
c121723.graph_c1	17.1151	13.42	4.6114	2.26378	1.61e-06	-2.26809	down	Cellular Component: exocyst (GO:0000145);; Biological Process: exocytosis (GO:0006887);;	--	--	--	[U]	Intracellular trafficking, secretion, and vesicular transport	Exo70 exocyst complex subunit	Exocyst complex component EXO70A1 GN=EXO70A1 OS=Arabidopsis thaliana (Mouse-ear cress) PE=1 SV=1	PREDICTED: uncharacterized protein LOC101512865 [Cicer arietinum]
c121789.graph_c0	0.162168	0.227746	8.04264	5.86201	1.1e-07	5.04005	up	--	--	--	--	--	--	--	--	--
c121795.graph_c0	45.1886	28.6077	16.3316	8.70972	0.0012936	-1.66283	down	Biological Process: autophagy (GO:0006914);; Biological Process: response to salt stress (GO:0009651);;	--	--	--	--	--	--	--	hypothetical protein MTR_7g065150 [Medicago truncatula]
c121869.graph_c0	0.306339	0.0537772	22.4494	22.1748	5.12e-31	6.9288	up	--	--	--	--	[GC]	--	UDP-glucoronosyl and UDP-glucosyl transferase	Anthocyanidin 3-O-glucosyltransferase GN=RT OS=Petunia hybrida (Petunia) PE=2 SV=1	UDP rhamnose anthocyanidin-3-glucoside rhamnosyltransferase [Medicago truncatula]
c121890.graph_c0	5.28605	6.08106	19.9986	23.9002	0.000285932	1.87301	up	--	[P]	Inorganic ion transport and metabolism	--	[Q]	Secondary metabolites biosynthesis, transport and catabolism	ABC transporter;; AAA domain	ABC transporter I family member 11, chloroplastic (Precursor) GN=MUA22.10 OS=Arabidopsis thaliana (Mouse-ear cress) PE=2 SV=1	ABC transporter I family member [Medicago truncatula]
c121899.graph_c0	0.0252997	0	0.948692	0.720535	5.19e-07	6.02811	up	--	--	--	--	[I]	Lipid transport and metabolism	CRAL/TRIO domain;; CRAL/TRIO, N-terminal domain	Patellin-6 GN=PATL6 OS=Arabidopsis thaliana (Mouse-ear cress) PE=2 SV=1	PREDICTED: patellin-6-like [Cicer arietinum]
c121903.graph_c0	2.75693	0.979609	10.3259	6.00341	0.00628006	2.05029	up	--	--	--	--	--	--	Protein of unknown function (DUF789)	--	plant/F9H3-4 protein [Medicago truncatula]
c121939.graph_c0	12.9203	9.92448	30.5696	30.5563	0.00468078	1.34857	up	--	--	--	--	--	--	Protein of unknown function (DUF632)	--	PREDICTED: uncharacterized protein LOC101510124 [Cicer arietinum]
c121954.graph_c0	0.577109	0.10131	12.3328	7.05907	1.27e-06	4.77783	up	--	--	--	--	--	--	--	--	PREDICTED: uncharacterized protein LOC100820117 [Glycine max]
c121960.graph_c2	0	0	3.07099	2.31748	6.32e-09		up	Biological Process: cellular process (GO:0009987);;	--	--	--	[R]	General function prediction only	--	--	hypothetical protein VITISV_043900 [Vitis vinifera]
c121984.graph_c0	0	0	6.28054	4.342	4.5e-10		up	--	--	--	--	--	--	--	--	--
c121997.graph_c0	33.234	23.8501	12.221	4.12579	0.00010372	-1.93831	down	--	--	--	--	--	--	PB1 domain	--	PREDICTED: uncharacterized protein LOC101504255 [Cicer arietinum]
c122008.graph_c0	124.509	129.943	27.2272	21.2807	1.11e-08	-2.49089	down	--	[C]	Energy production and conversion	--	--	--	FAD binding domain;; Berberine and berberine like	Reticuline oxidase (Precursor) GN=BBE1 OS=Papaver somniferum (Opium poppy) PE=3 SV=1	Reticuline oxidase [Medicago truncatula]
c122027.graph_c0	13.5299	11.9083	2.74635	2.79152	0.000633922	-2.27539	down	--	--	--	--	--	--	--	--	--
c122055.graph_c0	0.234328	0.0352593	2.1866	1.65008	0.000116712	3.79234	up	--	--	--	--	--	--	Arabidopsis phospholipase-like protein (PEARLI 4)	--	PREDICTED: uncharacterized protein LOC101496882 isoform X1 [Cicer arietinum]
c122089.graph_c0	0.283107	0.0372741	24.1428	16.5134	1.92e-24	6.94502	up	--	--	--	--	--	--	--	--	--
c122110.graph_c0	28.3647	26.3663	11.6796	7.76206	0.000400169	-1.59864	down	--	--	--	--	--	--	--	Uncharacterized protein At1g76660 GN=At1g76660 OS=Arabidopsis thaliana (Mouse-ear cress) PE=2 SV=1	hydroxyproline-rich glycoprotein family protein [Medicago truncatula]
c122127.graph_c0	0.141094	0	1.8347	1.27505	1.57e-05	4.44058	up	--	--	--	--	--	--	--	--	--
c122140.graph_c0	52.1047	43.7634	2.4723	6.86981	3.95e-15	-3.37444	down	--	--	--	--	--	--	F-box associated;; F-box domain	F-box/kelch-repeat protein At3g23880 GN=At3g23880 OS=Arabidopsis thaliana (Mouse-ear cress) PE=2 SV=1	F-box and associated interaction domain protein [Medicago truncatula]
c122257.graph_c0	2.86649	2.96763	17.0404	12.8817	7.89e-06	2.25701	up	--	--	--	--	--	--	Flavin containing amine oxidoreductase;; NAD(P)-binding Rossmann-like domain;; FAD binding domain	--	amine oxidase [Medicago truncatula]
c122290.graph_c1	40.3955	26.0891	9.19954	11.1532	0.000155427	-1.7598	down	--	--	--	--	--	--	--	--	--
c122291.graph_c0	3.34093	3.3763	0.218446	0.24727	4.34e-05	-3.92485	down	Molecular Function: nucleic acid binding (GO:0003676);; Molecular Function: ubiquitin-protein ligase activity (GO:0004842);; Molecular Function: zinc ion binding (GO:0008270);; Biological Process: protein ubiquitination (GO:0016567);;	--	--	--	[R]	General function prediction only	gag-polypeptide of LTR copia-type;; gag-polypeptide of LTR copia-type	Endonuclease OS=Nicotiana tabacum (Common tobacco) PE=2 SV=1	Retrovirus-related Pol polyprotein from transposon TNT 1-94, partial [Glycine soja]
c122296.graph_c0	25.8459	18.0863	72.9665	54.3321	0.00181771	1.4482	up	Molecular Function: glutathione transferase activity (GO:0004364);; Cellular Component: cytoplasm (GO:0005737);; Biological Process: aromatic amino acid family metabolic process (GO:0009072);; Molecular Function: maleylacetoacetate isomerase activity (GO:0016034);;	[O]	Posttranslational modification, protein turnover, chaperones	K01800|1.55621e-133|cam:101490720|glutathione S-transferase zeta class-like; K01800 maleylacetoacetate isomerase [EC:5.2.1.2] (A)	[O]	Posttranslational modification, protein turnover, chaperones	Glutathione S-transferase, N-terminal domain;; Glutathione S-transferase, N-terminal domain;; Glutathione S-transferase, N-terminal domain;; Glutathione S-transferase, C-terminal domain;; Glutathione S-transferase, C-terminal domain	Glutathione S-transferase zeta class OS=Euphorbia esula (Leafy spurge) PE=2 SV=1	PREDICTED: glutathione S-transferase zeta class-like isoform X2 [Cicer arietinum]
c122297.graph_c0	0.0475923	0.0501283	1.89976	1.1469	3.41e-06	4.84585	up	Biological Process: carbohydrate catabolic process (GO:0016052);; Molecular Function: cation binding (GO:0043169);; Molecular Function: vicianin beta-glucosidase activity (GO:0050392);;	[G]	Carbohydrate transport and metabolism	K01188|0|mtr:MTR_3g026620|Beta-glucosidase; K01188 beta-glucosidase [EC:3.2.1.21] (A)	[G]	Carbohydrate transport and metabolism	Glycosyl hydrolase family 1	Vicianin hydrolase {ECO:0000312|EMBL:ABD03937.1} (Precursor; Fragment) OS=Vicia sativa subsp. nigra (Common vetch) PE=1 SV=1	RecName: Full=Vicianin hydrolase; Short=VH; Flags: Precursor, partial [Vicia sativa subsp. nigra]
c122322.graph_c0	83.9337	43.476	8.64955	4.37551	0.00034529	-3.38917	down	--	--	--	--	--	--	--	--	hypothetical protein MTR_3g092630 [Medicago truncatula]
c122354.graph_c0	5.95671	3.02889	0	0	3.9e-06		down	--	--	--	--	--	--	--	--	--
c122360.graph_c0	0.320114	0.0963348	5.6976	5.10944	9.84e-07	4.65312	up	--	--	--	--	--	--	--	--	--
c122368.graph_c0	5.32251	4.6935	0.149726	0.632734	2.58e-07	-3.67723	down	--	--	--	--	--	--	AP2 domain	Ethylene-responsive transcription factor ERF053 GN=ERF053 OS=Arabidopsis thaliana (Mouse-ear cress) PE=2 SV=1	ethylene response factor [Medicago truncatula]
c122373.graph_c0	5.00888	3.29084	0.0599885	0.923495	0.000819189	-3.03265	down	--	--	--	--	--	--	--	--	F-box protein interaction domain protein [Medicago truncatula]
c122379.graph_c0	84.8915	71.03	28.703	17.5842	1.57e-05	-1.8584	down	--	[RTKL]	--	--	[T]	Signal transduction mechanisms	Protein kinase domain;; Protein tyrosine kinase;; Kinase-like	Mitogen-activated protein kinase kinase 9 GN=T9L24.32 OS=Arabidopsis thaliana (Mouse-ear cress) PE=1 SV=1	PREDICTED: mitogen-activated protein kinase kinase 5-like [Cicer arietinum]
c122388.graph_c0	24.7528	14.2148	4.43432	3.34037	0.000399234	-2.40358	down	--	--	--	--	--	--	--	--	--
c122415.graph_c0	32.7043	30.6557	8.33491	0.450613	3.01e-06	-3.05104	down	--	--	--	--	--	--	--	--	--
c122420.graph_c0	11.4215	7.69927	31.1983	29.5258	0.00161612	1.59747	up	--	--	--	--	[I]	Lipid transport and metabolism	GDSL-like Lipase/Acylhydrolase;; GDSL-like Lipase/Acylhydrolase family	GDSL esterase/lipase CPRD49 (Precursor) GN=CPRD49 OS=Arabidopsis thaliana (Mouse-ear cress) PE=2 SV=1	GDSL esterase/lipase CPRD49 [Medicago truncatula]
c122438.graph_c0	5.91901	3.4569	13.1262	12.7178	0.00933423	1.40029	up	--	--	--	--	--	--	XH domain;; XS domain;; XS zinc finger domain	Protein INVOLVED IN DE NOVO 2 {ECO:0000303|PubMed:19915591} OS=Arabidopsis thaliana (Mouse-ear cress) PE=1 SV=1	XH/XS domain protein [Medicago truncatula]
c122440.graph_c0	4.5785	3.66323	0.159757	0.0482233	1.54e-07	-5.45262	down	--	--	--	--	--	--	--	--	--
c122451.graph_c0	7.09962	4.41198	0.687027	0.777681	0.0010232	-3.02928	down	--	--	--	K01082|4.38739e-07|gmx:100776247|PAP-specific phosphatase HAL2-like; K01082 3'(2'), 5'-bisphosphate nucleotidase [EC:3.1.3.7] (A)	--	--	--	--	hypothetical protein PHAVU_006G190400g [Phaseolus vulgaris]
c122453.graph_c0	18.5676	23.5482	10.0621	8.59795	0.00952039	-1.27631	down	--	--	--	--	--	--	Plant protein of unknown function (DUF946)	--	hypothetical protein MTR_1g080370 [Medicago truncatula]
c122519.graph_c0	3.8813	1.61945	0	0.16431	0.00178363	-4.98914	down	--	--	--	--	--	--	--	--	--
c122530.graph_c0	8.37895	9.50195	0.176574	1.85482	9.45e-07	-3.1218	down	--	--	--	--	--	--	Protein of unknown function (DUF295)	F-box protein SKIP23 GN=SKIP23 OS=Arabidopsis thaliana (Mouse-ear cress) PE=1 SV=1	F-box SKIP28-like protein [Medicago truncatula]
c122549.graph_c0	0.214854	0.161645	1.74498	1.04225	0.00344132	2.78459	up	--	[E]	Amino acid transport and metabolism	K14638|0|cam:101503217|putative peptide/nitrate transporter At2g37900-like; K14638 solute carrier family 15 (peptide/histidine transporter), member 3/4 (A)	[E]	Amino acid transport and metabolism	POT family	Protein NRT1/ PTR FAMILY 5.7 GN=NPF5.7 OS=Arabidopsis thaliana (Mouse-ear cress) PE=2 SV=2	peptide/nitrate transporter plant [Medicago truncatula]
c122595.graph_c0	0.174683	0.183992	6.05727	4.84742	1.04e-06	4.82749	up	--	[R]	General function prediction only	K12881|2.80907e-90|cam:101493804|RNA and export factor-binding protein 2-like; K12881 THO complex subunit 4 (A)	[A]	RNA processing and modification	RNA recognition motif. (a.k.a. RRM, RBD, or RNP domain);; RNA recognition motif (a.k.a. RRM, RBD, or RNP domain)	THO complex subunit 4B GN=ALY2 OS=Arabidopsis thaliana (Mouse-ear cress) PE=1 SV=1	PREDICTED: RNA and export factor-binding protein 2-like [Cicer arietinum]
c122597.graph_c0	70.1245	78.9688	24.8049	15.4674	3.88e-06	-2.00563	down	--	[M]	Cell wall/membrane/envelope biogenesis	--	--	--	Cellulose synthase;; Cellulose synthase	Cellulose synthase-like protein B4 GN=CSLB4 OS=Arabidopsis thaliana (Mouse-ear cress) PE=3 SV=1	cellulose synthase H1-like protein [Medicago truncatula]
c122608.graph_c0	49.0623	28.0912	12.3932	12.0327	0.00828485	-1.72094	down	--	--	--	--	--	--	Caleosin related protein	Probable peroxygenase 5 GN=F5A18.14 OS=Arabidopsis thaliana (Mouse-ear cress) PE=2 SV=1	hypothetical protein MTR_097s0017 [Medicago truncatula]
c122655.graph_c1	51.7731	51.0006	0.155979	3.38997	1.02e-20	-4.82503	down	--	--	--	--	--	--	--	--	--
c122669.graph_c0	26.8813	23.0691	83.5225	54.3518	0.00302236	1.36128	up	Molecular Function: urate oxidase activity (GO:0004846);; Cellular Component: peroxisome (GO:0005777);; Biological Process: purine nucleobase metabolic process (GO:0006144);; Biological Process: nodulation (GO:0009877);; Biological Process: urate catabolic process (GO:0019628);; Biological Process: oxidation-reduction process (GO:0055114);;	[Q]	Secondary metabolites biosynthesis, transport and catabolism	K00365|0|cam:101500535|nodulin-35; uricase-2 isozyme 1-like (EC:1.7.3.3); K00365 urate oxidase [EC:1.7.3.3] (A)	[Q]	Secondary metabolites biosynthesis, transport and catabolism	Uricase	Uricase-2 isozyme 1 OS=Glycine max (Soybean) PE=1 SV=2	uricase-2 isozyme 1-like [Cicer arietinum]
c122687.graph_c0	0.494897	0.670202	6.49948	6.96988	0.000169546	3.44136	up	Molecular Function: RNA binding (GO:0003723);; Molecular Function: RNA-directed DNA polymerase activity (GO:0003964);; Molecular Function: monooxygenase activity (GO:0004497);; Molecular Function: iron ion binding (GO:0005506);; Biological Process: RNA-dependent DNA replication (GO:0006278);; Molecular Function: electron carrier activity (GO:0009055);; Molecular Function: oxidoreductase activity,…	[Q]	Secondary metabolites biosynthesis, transport and catabolism	--	[QI]	--	Cytochrome P450	Cytochrome P450 704C1 GN=CYP704C1 OS=Pinus taeda (Loblolly pine) PE=2 SV=1	Cytochrome P450 [Medicago truncatula]
c122703.graph_c0	3.45881	2.11695	0	0.358393	4.72e-05	-3.89775	down	--	--	--	--	[T]	Signal transduction mechanisms	TraB family	--	PREDICTED: traB domain-containing protein-like [Cicer arietinum]
c122714.graph_c0	8.44143	10.1152	31.3355	20.4399	0.00673489	1.36338	up	Biological Process: polysaccharide catabolic process (GO:0000272);; Molecular Function: chitinase activity (GO:0004568);; Cellular Component: extracellular region (GO:0005576);; Cellular Component: vacuole (GO:0005773);; Cellular Component: plasma membrane (GO:0005886);; Biological Process: chitin catabolic process (GO:0006032);; Molecular Function: chitin binding (GO:0008061);; Biological Proces…	[R]	General function prediction only	--	[R]	General function prediction only	Chitinase class I;; Chitin recognition protein	Chitinase 7 (Precursor) OS=Oryza sativa subsp. japonica (Rice) PE=2 SV=1	Os05g0399700 [Oryza sativa Japonica Group]
c122740.graph_c0	0.692256	0.486096	4.2083	4.53028	7.86e-05	2.82768	up	--	--	--	--	--	--	GRAS domain family	Protein SCARECROW GN=SCR OS=Pisum sativum (Garden pea) PE=2 SV=1	RecName: Full=Protein SCARECROW; AltName: Full=PsSCR [Pisum sativum]
c122813.graph_c0	2.52515	1.41402	0.0386641	0.105038	3.06e-06	-4.77694	down	Biological Process: metabolic process (GO:0008152);; Molecular Function: ligase activity (GO:0016874);;	[IQ]	--	K01904|0|mtr:MTR_080s0007|4-coumarate CoA ligase; K01904 4-coumarate--CoA ligase [EC:6.2.1.12] (A)	[I]	Lipid transport and metabolism	AMP-binding enzyme	4-coumarate--CoA ligase 1 GN=4CL1 OS=Nicotiana tabacum (Common tobacco) PE=2 SV=1	4-coumarate CoA ligase [Medicago truncatula]
c122824.graph_c0	1.2457	1.07929	5.34679	4.66578	0.0053438	2.02146	up	--	--	--	--	[R]	General function prediction only	PPR repeat family;; PPR repeat;; PPR repeat;; Pentatricopeptide repeat domain;; DYW family of nucleic acid deaminases;; Tetratricopeptide repeat	Pentatricopeptide repeat-containing protein At1g25360 GN=PCMP-H74 OS=Arabidopsis thaliana (Mouse-ear cress) PE=2 SV=1	PREDICTED: pentatricopeptide repeat-containing protein At1g25360-like [Cicer arietinum]
c122829.graph_c0	14.4351	8.70377	31.8657	28.7429	0.00635906	1.32081	up	Cellular Component: endosome (GO:0005768);; Cellular Component: Golgi apparatus (GO:0005794);; Cellular Component: trans-Golgi network (GO:0005802);;	--	--	--	--	--	--	--	PREDICTED: probable serine/threonine-protein kinase dyrk1-like [Cicer arietinum]
c122869.graph_c0	0.262274	0	18.5592	7.18227	0.000528539	6.56045	up	--	--	--	--	--	--	--	--	--
c122973.graph_c0	56.3191	32.6822	0.694138	2.60414	1.81e-09	-4.74111	down	--	--	--	--	--	--	AP2 domain	Ethylene-responsive transcription factor ERF017 GN=ERF017 OS=Arabidopsis thaliana (Mouse-ear cress) PE=2 SV=1	Ethylene-responsive transcription factor RAP2-1 [Medicago truncatula]
c122980.graph_c0	0	0	1.34636	1.09729	4.91e-08		up	--	--	--	--	--	--	--	--	--
c123040.graph_c1	0.525719	0.531584	4.04445	2.30346	0.00334624	2.46738	up	--	[V]	Defense mechanisms	--	[Q]	Secondary metabolites biosynthesis, transport and catabolism	ABC-2 type transporter;; ABC transporter;; Plant PDR ABC transporter associated;; AAA domain	ABC transporter G family member 31 GN=F23F1.14 OS=Arabidopsis thaliana (Mouse-ear cress) PE=1 SV=1	pleiotropic drug resistance subfamily G protein [Medicago truncatula]
c123067.graph_c0	2.89553	1.66354	9.23382	9.25564	0.00195033	1.96022	up	--	[R]	General function prediction only	--	[R]	General function prediction only	Calcineurin-like phosphoesterase;; Calcineurin-like phosphoesterase superfamily domain	Probable inactive purple acid phosphatase 16 (Precursor) GN=PAP16 OS=Arabidopsis thaliana (Mouse-ear cress) PE=2 SV=1	PREDICTED: probable inactive purple acid phosphatase 16-like [Cicer arietinum]
c123108.graph_c0	2.68164	1.43996	0.127206	0.115193	9.48e-05	-4.15144	down	--	--	--	--	--	--	--	--	--
c123115.graph_c0	20.006	14.7902	1.40023	3.41807	3.25e-09	-2.86884	down	--	--	--	--	--	--	Methyltransferase domain;; Methyltransferase FkbM domain	--	PREDICTED: uncharacterized protein LOC101508795 [Cicer arietinum]
c123135.graph_c1	7.06069	3.21349	0	0	3.11e-05		down	--	--	--	--	--	--	--	--	--
c123136.graph_c0	2.73734	0.58394	18.3579	15.7133	6.12e-09	3.32053	up	--	--	--	K10712|9.54432e-131|mtr:MTR_7g009710|2-aminoethanethiol dioxygenase; K10712 cysteamine dioxygenase [EC:1.13.11.19] (A)	[S]	Function unknown	Protein of unknown function (DUF1637)	--	2-aminoethanethiol dioxygenase-like protein [Medicago truncatula]
c123140.graph_c0	2.28855	2.14016	0.103487	0.0937135	1.59e-06	-4.57492	down	--	--	--	--	[R]	General function prediction only	--	--	hypothetical protein VITISV_004050 [Vitis vinifera]
c123149.graph_c0	0	0	2.82494	3.09671	2.76e-13		up	--	--	--	--	[R]	General function prediction only	zinc-binding in reverse transcriptase;; Reverse transcriptase (RNA-dependent DNA polymerase)	Putative ribonuclease H protein At1g65750 GN=At1g65750 OS=Arabidopsis thaliana (Mouse-ear cress) PE=3 SV=1	hypothetical protein [Beta vulgaris subsp. vulgaris]
c123152.graph_c0	0.800778	0.660091	5.36961	4.1379	0.000142403	2.61117	up	--	[P]	Inorganic ion transport and metabolism	K03549|0|mtr:MTR_7g108480|Potassium transporter; K03549 KUP system potassium uptake protein (A)	--	--	K+ potassium transporter	Potassium transporter 5 OS=Oryza sativa subsp. japonica (Rice) PE=2 SV=2	Potassium transporter [Medicago truncatula]
c123167.graph_c0	0.914971	0.770982	0.0276691	0	5.32e-07	-6.14	down	--	--	--	--	--	--	Protein of unknown function (DUF674)	--	hypothetical protein MTR_4g019340 [Medicago truncatula]
c123173.graph_c0	32.6763	21.4649	6.31022	5.07024	8.51e-08	-2.32942	down	--	--	--	--	[S]	Function unknown	Armadillo/beta-catenin-like repeat;; HEAT repeats;; HEAT repeat;; HEAT-like repeat;; U-box domain	U-box domain-containing protein 44 GN=F2D10.27 OS=Arabidopsis thaliana (Mouse-ear cress) PE=1 SV=1	E3 ubiquitin ligase PUB14, putative [Medicago truncatula]
c123186.graph_c2	9.95154	8.05195	25.0053	27.2023	0.00764584	1.468	up	--	--	--	--	--	--	--	--	--
c123190.graph_c0	2.28615	0.978237	12.0697	9.02558	4.49e-06	2.62425	up	--	--	--	--	--	--	--	Protein WVD2-like 1 GN=WDL1 OS=Arabidopsis thaliana (Mouse-ear cress) PE=1 SV=1	TPX2 (targeting protein for Xklp2) family protein [Medicago truncatula]
c123205.graph_c0	1.06632	0.68838	9.23696	9.60802	1.46e-06	3.36306	up	--	--	--	--	--	--	--	--	--
c123226.graph_c0	13.0878	8.91126	4.09356	2.72349	0.00532161	-1.78298	down	--	--	--	--	--	--	--	--	--
c123229.graph_c0	6.26314	6.87176	26.1653	19.0888	0.000495121	1.67838	up	Biological Process: pseudouridine synthesis (GO:0001522);; Molecular Function: RNA binding (GO:0003723);; Molecular Function: pseudouridine synthase activity (GO:0009982);;	[J]	Translation, ribosomal structure and biogenesis	--	[A]	RNA processing and modification	RNA pseudouridylate synthase	RNA pseudouridine synthase 5 GN=At3g52260 OS=Arabidopsis thaliana (Mouse-ear cress) PE=2 SV=2	PREDICTED: RNA pseudourine synthase 5-like [Cicer arietinum]
c123238.graph_c0	9.26038	5.01385	0.0241934	0.0876343	3.35e-10	-6.98186	down	--	--	--	--	--	--	--	--	--
c123289.graph_c0	37.8981	34.6743	17.0953	14.6536	0.00630755	-1.28115	down	--	[M]	Cell wall/membrane/envelope biogenesis	K09480|0|cam:101502949|digalactosyldiacylglycerol synthase 1, chloroplastic-like; K09480 digalactosyldiacylglycerol synthase [EC:2.4.1.241] (A)	--	--	Glycosyl transferases group 1;; Glycosyl transferases group 1	Digalactosyldiacylglycerol synthase 1, chloroplastic (Precursor) GN=DGD1 OS=Lotus japonicus (Lotus corniculatus var. japonicus) PE=2 SV=1	PREDICTED: digalactosyldiacylglycerol synthase 1, chloroplastic-like [Cicer arietinum]
c123310.graph_c0	6.37581	5.49071	0.824586	0.746713	0.000279839	-2.99927	down	--	--	--	--	[R]	General function prediction only	PPR repeat family;; PPR repeat;; Pentatricopeptide repeat domain;; PPR repeat	Pentatricopeptide repeat-containing protein At3g14330 GN=PCMP-H57 OS=Arabidopsis thaliana (Mouse-ear cress) PE=2 SV=2	PREDICTED: pentatricopeptide repeat-containing protein At3g12770-like [Cicer arietinum]
c123338.graph_c0	8.11456	7.66513	28.5118	22.7152	0.00829232	1.60435	up	Molecular Function: nucleotide binding (GO:0000166);; Molecular Function: dTDP-4-dehydrorhamnose reductase activity (GO:0008831);; Molecular Function: transferase activity (GO:0016740);; Biological Process: extracellular polysaccharide biosynthetic process (GO:0045226);; Biological Process: oxidation-reduction process (GO:0055114);;	[M]	Cell wall/membrane/envelope biogenesis	--	[IE]	--	RmlD substrate binding domain;; NAD dependent epimerase/dehydratase family;; Male sterility protein;; 3-beta hydroxysteroid dehydrogenase/isomerase family	--	PREDICTED: methionine adenosyltransferase 2 subunit beta-like [Cicer arietinum]
c123350.graph_c0	20.0911	18.5756	8.24027	4.73482	0.00141773	-1.68966	down	Cellular Component: membrane (GO:0016020);;	--	--	--	--	--	EamA-like transporter family	WAT1-related protein At5g40230 GN=At5g40230 OS=Arabidopsis thaliana (Mouse-ear cress) PE=3 SV=1	unknown [Medicago truncatula]
c123357.graph_c0	48.3872	25.0809	903.985	551.595	4.85e-15	4.22069	up	Molecular Function: hydrolase activity, acting on glycosyl bonds (GO:0016798);;	--	--	--	--	--	Thaumatin family	Glucan endo-1,3-beta-glucosidase (Precursor) OS=Prunus avium (Cherry) PE=1 SV=1	unknown [Medicago truncatula]
c123383.graph_c1	0	0.188953	14.3218	5.30562	0.00218631	6.47639	up	--	--	--	--	--	--	--	--	--
c123419.graph_c0	0.55167	0.402277	3.28522	3.81168	0.00264081	2.83556	up	--	--	--	--	--	--	--	--	--
c123445.graph_c0	9.08679	14.0871	123.382	79.6815	7.94e-13	3.00361	up	--	[Q]	Secondary metabolites biosynthesis, transport and catabolism	K10528|0|mtr:MTR_2g087890|Allene oxide synthase; K10528 hydroperoxide lyase [EC:4.1.2.-] (A)	--	--	Cytochrome P450	Linolenate hydroperoxide lyase, chloroplastic {ECO:0000305|PubMed:9701595} (Precursor) OS=Arabidopsis thaliana (Mouse-ear cress) PE=1 SV=1	hydroperoxide lyase [Medicago sativa]
c123462.graph_c0	16.0527	15.5085	48.0879	35.4037	0.00656184	1.30299	up	--	[O]	Posttranslational modification, protein turnover, chaperones	K00573|4.83229e-125|cam:101502253|PIMT2; protein-L-isoaspartate O-methyltransferase-like; K00573 protein-L-isoaspartate(D-aspartate) O-methyltransferase [EC:2.1.1.77] (A)	[O]	Posttranslational modification, protein turnover, chaperones	Protein-L-isoaspartate(D-aspartate) O-methyltransferase (PCMT);; Methyltransferase domain;; Methyltransferase domain;; Ribosomal protein L11 methyltransferase (PrmA)	Protein-L-isoaspartate O-methyltransferase 1 GN=T29H11.150 OS=Arabidopsis thaliana (Mouse-ear cress) PE=1 SV=3	protein L-isoaspartyl methyltransferase 2 [Cicer arietinum]
c123463.graph_c0	35.6615	36.7159	11.045	14.0744	0.000410143	-1.59445	down	--	[R]	General function prediction only	K00475|0|mtr:MTR_8g075890|Naringenin,2-oxoglutarate 3-dioxygenase; K00475 naringenin 3-dioxygenase [EC:1.14.11.9] (A)	[QR]	--	non-haem dioxygenase in morphine synthesis N-terminal;; 2OG-Fe(II) oxygenase superfamily	Naringenin,2-oxoglutarate 3-dioxygenase (Fragment) GN=AN3 OS=Petunia hybrida (Petunia) PE=1 SV=1	Naringenin,2-oxoglutarate 3-dioxygenase [Medicago truncatula]
c123494.graph_c0	9.42853	8.69847	2.47696	2.1691	0.000327471	-2.05145	down	--	--	--	--	--	--	Protein of unknown function (DUF295)	F-box protein SKIP23 GN=SKIP23 OS=Arabidopsis thaliana (Mouse-ear cress) PE=1 SV=1	F-box family protein [Medicago truncatula]
c123499.graph_c0	8.74647	7.85386	1.21783	2.13671	0.000468397	-2.34963	down	--	--	--	--	[R]	General function prediction only	PPR repeat family;; PPR repeat;; PPR repeat;; Pentatricopeptide repeat domain;; Domain of unknown function (DUF4413)	Pentatricopeptide repeat-containing protein At4g20740 GN=At4g20740 OS=Arabidopsis thaliana (Mouse-ear cress) PE=3 SV=1	PPR containing plant-like protein [Medicago truncatula]
c123502.graph_c0	6.71731	3.77805	0.197218	0.285749	3.48e-07	-4.47714	down	--	--	--	--	--	--	--	--	--
c123503.graph_c0	0	0	6.61767	15.201	0.000840732		up	--	--	--	--	--	--	FBD	--	F-box/RNI/FBD-like domain protein [Medicago truncatula]
c123538.graph_c0	4.73041	5.06115	1.32509	0.709063	0.00180047	-2.39172	down	Molecular Function: protein serine/threonine kinase activity (GO:0004674);; Molecular Function: ATP binding (GO:0005524);; Biological Process: protein phosphorylation (GO:0006468);;	[RTKL]	--	--	--	--	Carbohydrate-binding protein of the ER;; Protein tyrosine kinase;; Protein kinase domain;; Leucine rich repeat;; Leucine Rich repeats (2 copies);; Leucine Rich Repeat;; Leucine Rich repeat;; Protein tyrosine kinase;; Protein kinase domain	Probable LRR receptor-like serine/threonine-protein kinase At4g29180 (Precursor) GN=At4g29180 OS=Arabidopsis thaliana (Mouse-ear cress) PE=2 SV=2	LRR receptor-like kinase plant [Medicago truncatula]
c123553.graph_c0	3.52288	0.585885	20.2173	33.0763	0.00526861	3.70565	up	--	--	--	--	[I]	Lipid transport and metabolism	Lipase (class 3);; Protein of unknown function (DUF2974)	--	Lipase [Medicago truncatula]
c123563.graph_c0	0	0	4.2658	3.76637	2.4e-08		up	--	--	--	--	--	--	--	--	--
c123582.graph_c0	0.52847	0.591421	12.6851	8.6289	1.41e-14	4.13884	up	--	[I]	Lipid transport and metabolism	--	[I]	Lipid transport and metabolism	Prenyltransferase and squalene oxidase repeat;; Prenyltransferase-like;; Prenyltransferase-like;; Pectic acid lyase	Lupeol synthase GN=LUS1 OS=Glycyrrhiza glabra (Licorice) PE=1 SV=1	beta-amyrin synthase [Medicago truncatula]
c123623.graph_c0	14.9723	4.0665	107.298	54.2554	0.000772308	3.0073	up	--	--	--	--	--	--	--	--	--
c123628.graph_c0	1.82003	1.32208	11.4632	8.59324	0.0018256	2.58653	up	--	--	--	--	--	--	--	--	--
c123678.graph_c0	5.98061	3.12178	0.3201	0.115948	3.33e-05	-4.50185	down	--	[J]	Translation, ribosomal structure and biogenesis	K02900|1.66958e-13|eus:EUTSA_v10019240mg|hypothetical protein; K02900 large subunit ribosomal protein L27Ae (A)	[J]	Translation, ribosomal structure and biogenesis	--	60S ribosomal protein L27a-3 OS=Arabidopsis thaliana (Mouse-ear cress) PE=2 SV=2	hypothetical protein EUTSA_v10019240mg [Eutrema salsugineum]
c123717.graph_c0	16.0667	12.9354	7.18663	2.77778	0.000531314	-1.67303	down	--	--	--	--	[S]	Function unknown	U-box domain;; Armadillo/beta-catenin-like repeat;; Zinc-finger of the MIZ type in Nse subunit;; Armadillo-like;; Neurochondrin	U-box domain-containing protein 18 GN=PUB18 OS=Arabidopsis thaliana (Mouse-ear cress) PE=2 SV=1	PREDICTED: U-box domain-containing protein 19-like [Cicer arietinum]
c123813.graph_c0	202.835	128.942	73.2243	30.9383	0.00133607	-1.78873	down	--	--	--	--	--	--	Stress up-regulated Nod 19;; Stress up-regulated Nod 19	--	MtN19-like protein [Pisum sativum]
c123856.graph_c0	31.6765	27.4317	11.9064	10.2933	0.00126341	-1.49846	down	Molecular Function: translation initiation factor activity (GO:0003743);; Biological Process: translational initiation (GO:0006413);;	--	--	K11593|0|mtr:MTR_4g113200|Argonaute protein group; K11593 eukaryotic translation initiation factor 2C (A)	[J]	Translation, ribosomal structure and biogenesis	Piwi domain	Protein argonaute PNH1 GN=P0417D05.31 OS=Oryza sativa subsp. japonica (Rice) PE=2 SV=1	Argonaute protein group [Medicago truncatula]
c123920.graph_c0	52.2101	35.2641	9.31031	10.2263	1.57e-07	-2.22278	down	Molecular Function: serine-type carboxypeptidase activity (GO:0004185);; Biological Process: proteolysis (GO:0006508);; Molecular Function: transferase activity (GO:0016740);;	--	--	K16296|0|pvu:PHAVU_009G072900g|hypothetical protein; K16296 serine carboxypeptidase-like clade I [EC:3.4.16.-] (A)	[OE]	--	Serine carboxypeptidase	Serine carboxypeptidase-like 19 chain B (Precursor) GN=F17I14.170 OS=Arabidopsis thaliana (Mouse-ear cress) PE=1 SV=1	1-O-acylglucose:anthocyanin acyltransferase [Medicago truncatula]
c123926.graph_c0	1.99921	0.779904	17.1967	17.8436	1.25e-06	3.61293	up	Molecular Function: proline-tRNA ligase activity (GO:0004827);; Molecular Function: ATP binding (GO:0005524);; Cellular Component: cytoplasm (GO:0005737);; Biological Process: prolyl-tRNA aminoacylation (GO:0006433);;	[J]	Translation, ribosomal structure and biogenesis	K01881|5.76498e-15|mtr:MTR_3g114550|Prolyl-tRNA synthetase; K01881 prolyl-tRNA synthetase [EC:6.1.1.15] (A)	[J]	Translation, ribosomal structure and biogenesis	--	--	prolyl-tRNA synthetase [Medicago truncatula]
c124004.graph_c0	14.2087	17.4081	7.13144	3.97205	0.00154276	-1.63734	down	Molecular Function: metal ion binding (GO:0046872);;	[O]	Posttranslational modification, protein turnover, chaperones	--	[O]	Posttranslational modification, protein turnover, chaperones	Ring finger domain;; RING-H2 zinc finger;; Zinc finger, C3HC4 type (RING finger);; Zinc finger, C3HC4 type (RING finger)	RING-H2 finger protein ATL11 (Precursor) GN=ATL11 OS=Arabidopsis thaliana (Mouse-ear cress) PE=2 SV=2	RING finger protein [Medicago truncatula]
c124008.graph_c0	1.20526	1.26948	6.63347	3.74063	0.00634712	1.94685	up	Molecular Function: ATP binding (GO:0005524);; Biological Process: response to stress (GO:0006950);;	[O]	Posttranslational modification, protein turnover, chaperones	K03283|0|gmx:100798636|heat shock cognate 70 kDa protein-like; K03283 heat shock 70kDa protein 1/8 (A)	[O]	Posttranslational modification, protein turnover, chaperones	Hsp70 protein	Heat shock cognate 70 kDa protein GN=HSP70 OS=Petunia hybrida (Petunia) PE=2 SV=1	heat shock cognate 70 kDa-like protein [Medicago truncatula]
c124010.graph_c0	0.4	0.0702192	5.56425	8.69005	0.000220332	4.92644	up	--	--	--	--	--	--	--	--	--
c124015.graph_c0	74.9088	56.225	29.2549	20.3056	0.000928824	-1.49776	down	Cellular Component: nucleus (GO:0005634);; Cellular Component: cytosol (GO:0005829);; Cellular Component: plasma membrane (GO:0005886);; Biological Process: response to heat (GO:0009408);; Biological Process: response to high light intensity (GO:0009644);; Biological Process: response to hydrogen peroxide (GO:0042542);; Biological Process: response to cadmium ion (GO:0046686);;	[R]	General function prediction only	K09553|0|mtr:MTR_5g012030|Stress-induced-phosphoprotein; K09553 stress-induced-phosphoprotein 1 (A)	[O]	Posttranslational modification, protein turnover, chaperones	TPR repeat;; Tetratricopeptide repeat;; Tetratricopeptide repeat;; Tetratricopeptide repeat;; Tetratricopeptide repeat;; Tetratricopeptide repeat;; Tetratricopeptide repeat;; Tetratricopeptide repeat;; Tetratricopeptide repeat;; Tetratricopeptide repeat;; Tetratricopeptide repeat;; Anaphase-promoting complex, cyclosome, subunit 3;; SHNi-TPR;; Terpene synthase, N-terminal domain	Hsp70-Hsp90 organizing protein 3 GN=HOP3 OS=Arabidopsis thaliana (Mouse-ear cress) PE=2 SV=1	Stress-induced-phosphoprotein [Medicago truncatula]
c124047.graph_c0	4.58785	2.50937	1.16919	0.507019	0.00753054	-2.19212	down	--	--	--	--	--	--	Protein of unknown function (DUF3133)	Uncharacterized protein At5g05190 GN=Y-1 OS=Arabidopsis thaliana (Mouse-ear cress) PE=1 SV=1	DUF3133 family protein [Medicago truncatula]
c124058.graph_c0	3.75823	2.67079	16.7053	9.25018	0.00185254	1.90747	up	Molecular Function: transferase activity (GO:0016740);;	[R]	General function prediction only	--	[R]	General function prediction only	WD domain, G-beta repeat;; PQQ-like domain;; WD domain, G-beta repeat	Notchless protein homolog GN=NLE1 OS=Arabidopsis thaliana (Mouse-ear cress) PE=2 SV=1	transducin/WD40 repeat protein [Medicago truncatula]
c124102.graph_c0	32.2404	19.7258	7.11672	7.17644	0.000340289	-1.92398	down	Molecular Function: triglyceride lipase activity (GO:0004806);; Biological Process: lipid metabolic process (GO:0006629);; Molecular Function: phosphatidylcholine 1-acylhydrolase activity (GO:0008970);; Biological Process: ethylene biosynthetic process (GO:0009693);; Molecular Function: galactolipase activity (GO:0047714);;	[I]	Lipid transport and metabolism	--	[I]	Lipid transport and metabolism	Lipase (class 3);; Protein of unknown function (DUF2974)	Phospholipase A1-Ibeta2, chloroplastic (Precursor) GN=At4g16820 OS=Arabidopsis thaliana (Mouse-ear cress) PE=1 SV=2	Lipase [Medicago truncatula]
c124114.graph_c0	0.558363	1.24158	7.25436	4.00952	0.000231982	2.49511	up	Biological Process: microtubule nucleation (GO:0007020);; Molecular Function: primary amine oxidase activity (GO:0008131);; Biological Process: cytokinin-activated signaling pathway (GO:0009736);; Biological Process: oxidation-reduction process (GO:0055114);;	--	--	K12259|0|mtr:MTR_2g039160|hypothetical protein; K12259 spermine oxidase [EC:1.5.3.16 1.5.3.-] (A)	[H]	Coenzyme transport and metabolism	Flavin containing amine oxidoreductase;; NAD(P)-binding Rossmann-like domain	Probable polyamine oxidase 5 GN=PAO5 OS=Arabidopsis thaliana (Mouse-ear cress) PE=2 SV=1	hypothetical protein MTR_2g039160 [Medicago truncatula]
c124132.graph_c1	14.2575	13.6674	2.71288	1.93025	0.00405442	-2.69074	down	Molecular Function: hydrolase activity, acting on ester bonds (GO:0016788);;	--	--	--	[R]	General function prediction only	zinc-binding in reverse transcriptase	--	GDSL esterase/lipase [Medicago truncatula]
c124154.graph_c0	27.9992	48.6418	163.869	177.621	1.68e-06	2.05696	up	Molecular Function: aspartic-type endopeptidase activity (GO:0004190);; Biological Process: proteolysis (GO:0006508);;	--	--	--	[O]	Posttranslational modification, protein turnover, chaperones	Xylanase inhibitor C-terminal;; Xylanase inhibitor N-terminal	Basic 7S globulin low kDa subunit (Precursor) GN=BG OS=Glycine max (Soybean) PE=1 SV=2	Xyloglucan-specific endoglucanase inhibitor protein [Medicago truncatula]
c124160.graph_c0	1.31712	0.718424	9.55925	8.47614	4.16e-07	3.0817	up	--	--	--	K03178|4.58949e-66|mtr:MTR_5g072460|Ubiquitin-activating enzyme E1; K03178 ubiquitin-activating enzyme E1 [EC:6.3.2.19] (A)	--	--	Plant mobile domain;; Plant mobile domain	Serine/threonine-protein phosphatase 7 long form homolog GN=At1g48120 OS=Arabidopsis thaliana (Mouse-ear cress) PE=2 SV=1	Ubiquitin-activating enzyme E1 [Medicago truncatula]
c124168.graph_c1	0.328607	0	7.02231	2.87961	0.00363779	4.86003	up	--	--	--	--	--	--	--	--	--
c124206.graph_c0	10.5784	6.15135	44.6853	24.2611	0.00404101	1.94386	up	Molecular Function: transferase activity, transferring acyl groups other than amino-acyl groups (GO:0016747);;	--	--	--	--	--	Transferase family	Protein ECERIFERUM 26-like GN=CER26L OS=Arabidopsis thaliana (Mouse-ear cress) PE=2 SV=1	uncharacterized protein LOC100819144 [Glycine max]
c124223.graph_c1	0.44558	0.722037	3.68996	5.7068	0.00903753	2.93486	up	--	--	--	--	--	--	--	--	--
c124321.graph_c0	15.5201	16.438	4.81948	3.46626	3.91e-06	-2.05321	down	Molecular Function: inward rectifier potassium channel activity (GO:0005242);; Cellular Component: plasma membrane (GO:0005886);; Biological Process: iron ion transport (GO:0006826);; Biological Process: cell adhesion (GO:0007155);; Biological Process: response to water deprivation (GO:0009414);; Biological Process: response to salt stress (GO:0009651);; Biological Process: meristem initiation (G…	[R]	General function prediction only	--	[PT]	--	Ankyrin repeats (3 copies);; Ankyrin repeat;; Domain of unknown function (DUF3354);; Ion transport protein;; Ankyrin repeats (many copies);; Ankyrin repeats (many copies);; Ankyrin repeat;; Ion channel;; Cyclic nucleotide-binding domain	Potassium channel AKT1 GN=AKT1 OS=Arabidopsis thaliana (Mouse-ear cress) PE=1 SV=2	Potassium channel [Medicago truncatula]
c124345.graph_c0	6.85466	6.19218	1.03275	1.73684	0.000648389	-2.2813	down	--	--	--	--	--	--	--	--	--
c124412.graph_c0	0.39389	0.0957414	1.57597	1.69265	0.00625901	2.71208	up	Molecular Function: calmodulin binding (GO:0005516);;	--	--	--	--	--	--	Protein IQ-DOMAIN 1 GN=IQD1 OS=Arabidopsis thaliana (Mouse-ear cress) PE=1 SV=1	IQ domain-containing protein [Medicago truncatula]
c124425.graph_c0	5.57625	3.63591	15.3532	20.1859	0.00858877	1.90055	up	--	[R]	General function prediction only	K06955|4.08681e-108|mtr:MTR_2g064640|hypothetical protein; K06955 (A)	--	--	--	--	hypothetical protein MTR_2g064640 [Medicago truncatula]
c124492.graph_c1	4.1821	3.94926	0	0	9.07e-08		down	--	--	--	--	--	--	--	--	--
c124578.graph_c0	17.5396	16.893	67.9452	63.9953	1.63e-05	1.85362	up	Molecular Function: magnesium ion binding (GO:0000287);; Biological Process: response to hypoxia (GO:0001666);; Molecular Function: pyruvate decarboxylase activity (GO:0004737);; Biological Process: metabolic process (GO:0008152);; Cellular Component: membrane (GO:0016020);; Molecular Function: thiamine pyrophosphate binding (GO:0030976);;	[GHR]	--	K01568|0|mtr:MTR_7g069540|Pyruvate decarboxylase isozyme; K01568 pyruvate decarboxylase [EC:4.1.1.1] (A)	[EH]	--	Thiamine pyrophosphate enzyme, N-terminal TPP binding domain;; Thiamine pyrophosphate enzyme, central domain;; Thiamine pyrophosphate enzyme, C-terminal TPP binding domain	Pyruvate decarboxylase 1 GN=PDC1 OS=Arabidopsis thaliana (Mouse-ear cress) PE=2 SV=1	pyruvate decarboxylase 1 [Lotus corniculatus]
c124633.graph_c0	16.7686	19.1751	1.24648	0.718303	6.8e-15	-4.31609	down	--	--	--	--	--	--	Phloem protein 2;; F-box domain	F-box protein PP2-B10 GN=PP2B10 OS=Arabidopsis thaliana (Mouse-ear cress) PE=1 SV=1	F-box protein PP2-B1 [Medicago truncatula]
c124649.graph_c0	4.87844	3.72091	0.0813938	0.0368535	2.59e-09	-6.30504	down	--	--	--	--	--	--	--	--	--
c124713.graph_c0	19.5907	14.2632	5.53941	4.55633	2.95e-05	-1.82741	down	--	[C]	Energy production and conversion	K00001|0|cam:101511406|alcohol dehydrogenase-like 3-like; K00001 alcohol dehydrogenase [EC:1.1.1.1] (A)	[Q]	Secondary metabolites biosynthesis, transport and catabolism	Alcohol dehydrogenase GroES-like domain;; Zinc-binding dehydrogenase;; Mitochondrial carrier protein	Alcohol dehydrogenase-like 3 GN=At1g32780 OS=Arabidopsis thaliana (Mouse-ear cress) PE=2 SV=1	PREDICTED: alcohol dehydrogenase-like 3-like isoform X1 [Cicer arietinum]
c124759.graph_c0	3.56566	2.10317	0	0.218723	1.14e-06	-4.63263	down	--	--	--	--	[R]	General function prediction only	Reverse transcriptase (RNA-dependent DNA polymerase)	Endonuclease OS=Nicotiana tabacum (Common tobacco) PE=2 SV=1	PREDICTED: uncharacterized mitochondrial protein AtMg00810-like [Cicer arietinum]
c124881.graph_c0	11.8217	9.14988	4.08106	2.09517	0.00129495	-1.87755	down	Molecular Function: nucleotide binding (GO:0000166);; Cellular Component: peroxisome (GO:0005777);; Molecular Function: oxidoreductase activity (GO:0016491);; Biological Process: oxidation-reduction process (GO:0055114);;	[IQR]	--	--	[R]	General function prediction only	Enoyl-(Acyl carrier protein) reductase;; short chain dehydrogenase	Secoisolariciresinol dehydrogenase (Fragment) OS=Forsythia intermedia (Border forsythia) PE=1 SV=1	Alcohol dehydrogenase [Medicago truncatula]
c124908.graph_c0	23.1496	17.7402	3.57194	6.18968	3.1e-05	-2.10344	down	--	--	--	--	--	--	--	--	--
c124974.graph_c2	0.493155	0.606006	33.7039	11.3441	0.0085081	5.20076	up	--	--	--	--	--	--	--	--	--
c125002.graph_c0	8.58424	6.17268	122.208	134.988	1.03e-17	4.06116	up	--	--	--	--	--	--	--	--	--
c125010.graph_c0	75.2848	90.235	18.2873	20.8299	3.48e-07	-2.16216	down	Molecular Function: monooxygenase activity (GO:0004497);; Molecular Function: iron ion binding (GO:0005506);; Cellular Component: endoplasmic reticulum membrane (GO:0005789);; Molecular Function: electron carrier activity (GO:0009055);; Cellular Component: integral component of membrane (GO:0016021);; Molecular Function: oxidoreductase activity, acting on paired donors, with incorporation or redu…	[Q]	Secondary metabolites biosynthesis, transport and catabolism	K13407|0|gmx:100795308|cytochrome P450 94A1-like; K13407 fatty acid omega-hydroxylase [EC:1.14.-.-] (A)	[QI]	--	Cytochrome P450;; Cytochrome P450	Cytochrome P450 94A1 GN=CYP94A1 OS=Vicia sativa (Spring vetch) PE=2 SV=2	PREDICTED: cytochrome P450 94A1-like [Glycine max]
c125067.graph_c0	0	0	5.17267	2.7494	1.13e-09		up	--	--	--	--	--	--	--	--	--
c125089.graph_c1	25.0849	19.1866	6.73125	9.14334	0.00471282	-1.53125	down	Biological Process: gibberellic acid mediated signaling pathway (GO:0009740);; Biological Process: seed dormancy process (GO:0010162);; Cellular Component: anchored component of membrane (GO:0031225);;	--	--	--	--	--	--	Uncharacterized GPI-anchored protein At4g28100 (Precursor) GN=At4g28100 OS=Arabidopsis thaliana (Mouse-ear cress) PE=1 SV=1	GPI-anchored protein, putative [Medicago truncatula]
c125111.graph_c0	11.4296	12.7139	3.83301	3.73186	0.000410143	-1.76239	down	--	[GEPR]	--	K08176|0|cam:101504714|probable inorganic phosphate transporter 1-9-like; K08176 MFS transporter, PHS family, inorganic phosphate transporter (A)	[P]	Inorganic ion transport and metabolism	Sugar (and other) transporter;; Major Facilitator Superfamily;; Sugar (and other) transporter	Probable inorganic phosphate transporter 1-9 GN=PHT1-9 OS=Arabidopsis thaliana (Mouse-ear cress) PE=2 SV=1	PREDICTED: probable inorganic phosphate transporter 1-9-like [Cicer arietinum]
c125135.graph_c0	15.276	14.2746	1.31673	1.15263	5.06e-14	-3.66892	down	--	[RTKL]	--	--	--	--	Glycosyl hydrolases family 18;; Protein tyrosine kinase;; Protein kinase domain;; Protein kinase domain;; Protein tyrosine kinase	G-type lectin S-receptor-like serine/threonine-protein kinase At1g11330 (Precursor) GN=At1g11330 OS=Arabidopsis thaliana (Mouse-ear cress) PE=2 SV=3	cysteine-rich RLK (receptor-like kinase) protein [Medicago truncatula]
c125141.graph_c0	2.86329	3.68038	0.17611	0.372116	0.000152098	-3.6239	down	--	--	--	--	--	--	--	--	--
c125150.graph_c0	1.44844	0.953516	7.59227	8.06522	0.00274361	2.64333	up	Molecular Function: inorganic anion exchanger activity (GO:0005452);; Biological Process: anion transport (GO:0006820);; Cellular Component: integral component of membrane (GO:0016021);;	--	--	--	[P]	Inorganic ion transport and metabolism	HCO3- transporter family	Boron transporter 1 GN=BOR1 OS=Arabidopsis thaliana (Mouse-ear cress) PE=1 SV=1	Boron transporter [Medicago truncatula]
c125151.graph_c0	4.77948	3.27959	0.546121	0.170533	2.86e-07	-3.62762	down	Biological Process: MAPK cascade (GO:0000165);; Molecular Function: protein serine/threonine kinase activity (GO:0004674);; Molecular Function: protein tyrosine kinase activity (GO:0004713);; Molecular Function: ATP binding (GO:0005524);; Biological Process: regulation of transcription, DNA-templated (GO:0006355);; Biological Process: protein phosphorylation (GO:0006468);; Biological Process: pro…	[RTKL]	--	--	--	--	Protein kinase domain;; Protein tyrosine kinase;; D-mannose binding lectin;; Thaumatin family	G-type lectin S-receptor-like serine/threonine-protein kinase RLK1 (Precursor) GN=RLK1 OS=Arabidopsis thaliana (Mouse-ear cress) PE=2 SV=2	lectin kinase family protein [Medicago truncatula]
c125217.graph_c2	8.71121	2.30433	0	0	0.00744567		down	--	--	--	--	[R]	General function prediction only	--	--	PREDICTED: uncharacterized protein LOC104895905 [Beta vulgaris subsp. vulgaris]
c125219.graph_c0	17.2141	10.9876	2.00645	1.13056	4.23e-08	-3.26889	down	--	--	--	--	--	--	--	--	hypothetical protein POPTR_0016s07700g [Populus trichocarpa]
c125232.graph_c0	65.3173	55.0531	24.5683	19.52	0.000566255	-1.53902	down	Molecular Function: actin binding (GO:0003779);; Cellular Component: actin cytoskeleton (GO:0015629);; Biological Process: actin filament depolymerization (GO:0030042);;	--	--	K05765|6.56167e-82|gmx:100818634|actin-depolymerizing factor-like; K05765 cofilin (A)	[Z]	Cytoskeleton	Cofilin/tropomyosin-type actin-binding protein	Actin-depolymerizing factor 6 GN=ADF6 OS=Arabidopsis thaliana (Mouse-ear cress) PE=1 SV=1	Actin-depolymerizing factor 6 [Glycine soja]
c125294.graph_c0	0.0537796	0	6.50528	12.1942	8.9e-05	8.48263	up	--	--	--	--	--	--	Armadillo/beta-catenin-like repeat;; HEAT repeats	--	PREDICTED: importin subunit alpha-like [Cicer arietinum]
c125301.graph_c0	0.294024	0.185815	1.37521	1.95389	0.00374976	2.75332	up	--	--	--	--	[R]	General function prediction only	PPR repeat family;; PPR repeat;; Pentatricopeptide repeat domain;; PPR repeat;; Bacterial transcriptional activator domain	Pentatricopeptide repeat-containing protein At2g36980, mitochondrial (Precursor) GN=PCMP-E73 OS=Arabidopsis thaliana (Mouse-ear cress) PE=2 SV=1	Pentatricopeptide repeat-containing protein [Medicago truncatula]
c125354.graph_c0	22.3302	18.925	3.4399	5.23893	2.53e-06	-2.29771	down	--	--	--	--	--	--	B3 DNA binding domain	B3 domain-containing protein REM20 GN=REM20 OS=Arabidopsis thaliana (Mouse-ear cress) PE=2 SV=1	plant-specific B3-DNA-binding domain protein [Medicago truncatula]
c125411.graph_c0	110.05	54.1901	427.43	322.949	1.94e-05	2.11963	up	Molecular Function: monooxygenase activity (GO:0004497);; Molecular Function: iron ion binding (GO:0005506);; Molecular Function: electron carrier activity (GO:0009055);; Molecular Function: oxidoreductase activity, acting on paired donors, with incorporation or reduction of molecular oxygen (GO:0016705);; Molecular Function: heme binding (GO:0020037);; Biological Process: oxidation-reduction pro…	[Q]	Secondary metabolites biosynthesis, transport and catabolism	--	[Q]	Secondary metabolites biosynthesis, transport and catabolism	Cytochrome P450;; Cytochrome P450	Cytochrome P450 71B37 GN=CYP71B37 OS=Arabidopsis thaliana (Mouse-ear cress) PE=3 SV=2	Cytochrome P450 71B37 [Medicago truncatula]
c125414.graph_c0	91.2208	54.576	15.7481	13.1345	5.43e-05	-2.40885	down	Biological Process: regulation of transcription, DNA-templated (GO:0006355);;	--	--	--	--	--	GRAS domain family	Scarecrow-like protein 13 GN=SCL13 OS=Arabidopsis thaliana (Mouse-ear cress) PE=2 SV=2	Chitin-inducible gibberellin-responsive protein [Medicago truncatula]
c125417.graph_c0	1.65248	0.32382	6.50794	5.85124	0.00213948	2.61172	up	Molecular Function: oxidoreductase activity (GO:0016491);; Molecular Function: metal ion binding (GO:0046872);;	[Q]	Secondary metabolites biosynthesis, transport and catabolism	--	[QI]	--	Cytochrome P450	Alkane hydroxylase MAH1 {ECO:0000303|PubMed:17905869} OS=Arabidopsis thaliana (Mouse-ear cress) PE=2 SV=1	cytochrome P450 family protein [Medicago truncatula]
c125423.graph_c0	0.0237041	0.324574	2.63791	1.84352	9.18e-05	3.51153	up	Molecular Function: calmodulin binding (GO:0005516);; Biological Process: defense response (GO:0006952);; Biological Process: response to biotic stimulus (GO:0009607);; Cellular Component: integral component of membrane (GO:0016021);;	--	--	K08472|0|cam:101501959|MLO-like protein 1-like; K08472 mlo protein (A)	--	--	Mlo family	MLO-like protein 1 GN=T10P11.12 OS=Arabidopsis thaliana (Mouse-ear cress) PE=1 SV=1	PREDICTED: MLO-like protein 1-like [Cicer arietinum]
c125434.graph_c0	158.173	133.281	45.787	32.1565	5.2e-06	-2.00069	down	Molecular Function: ATPase activator activity (GO:0001671);; Cellular Component: cytosol (GO:0005829);; Biological Process: protein folding (GO:0006457);; Biological Process: response to heat (GO:0009408);; Biological Process: response to high light intensity (GO:0009644);; Biological Process: positive regulation of ATPase activity (GO:0032781);; Biological Process: response to endoplasmic reticu…	[O]	Posttranslational modification, protein turnover, chaperones	--	[S]	Function unknown	Activator of Hsp90 ATPase, N-terminal;; Activator of Hsp90 ATPase homolog 1-like protein	--	PREDICTED: activator of 90 kDa heat shock protein ATPase homolog [Cicer arietinum]
c125442.graph_c0	24.6183	8.7535	0.569022	0.171761	0.00650342	-5.60737	down	--	--	--	--	[R]	General function prediction only	--	--	PREDICTED: uncharacterized protein LOC102667554 [Glycine max]
c125447.graph_c1	0	0.149431	3.2606	5.59453	0.000720575	5.76119	up	Biological Process: primary metabolic process (GO:0044238);; Biological Process: cellular macromolecule metabolic process (GO:0044260);;	--	--	--	[I]	Lipid transport and metabolism	gag-polypeptide of LTR copia-type	Phosphatidylinositol/phosphatidylcholine transfer protein SFH8 GN=SFH8 OS=Arabidopsis thaliana (Mouse-ear cress) PE=2 SV=1	hypothetical protein glysoja_031232, partial [Glycine soja]
c125487.graph_c0	11.839	8.01411	57.6734	31.5678	0.0013012	2.06368	up	--	--	--	--	--	--	Pollen proteins Ole e I like	--	pollen Ole e I family allergen [Medicago truncatula]
c125501.graph_c0	39.5279	38.6367	17.2117	16.0618	0.00494068	-1.31777	down	Molecular Function: nucleotide binding (GO:0000166);; Molecular Function: catalytic activity (GO:0003824);; Molecular Function: structural constituent of eye lens (GO:0005212);; Biological Process: metabolic process (GO:0008152);; Cellular Component: chloroplast (GO:0009507);; Biological Process: systemic acquired resistance (GO:0009627);; Biological Process: response to endoplasmic reticulum str…	[E]	Amino acid transport and metabolism	--	[E]	Amino acid transport and metabolism	Ornithine cyclodeaminase/mu-crystallin family;; Shikimate / quinate 5-dehydrogenase	--	Ornithine cyclodeaminase [Medicago truncatula]
c125510.graph_c0	4.28626	5.01845	0.200269	0.785876	2.61e-06	-3.25161	down	Molecular Function: beta-galactosidase activity (GO:0004565);; Cellular Component: cell wall (GO:0005618);; Biological Process: carbohydrate metabolic process (GO:0005975);; Biological Process: plant-type cell wall modification (GO:0009827);; Molecular Function: cation binding (GO:0043169);; Cellular Component: apoplast (GO:0048046);; Biological Process: mucilage biosynthetic process involved in …	[G]	Carbohydrate transport and metabolism	--	[G]	Carbohydrate transport and metabolism	Glycosyl hydrolases family 35;; Beta-galactosidase jelly roll domain;; Beta-galactosidase;; Glycosyl hydrolases family 2, sugar binding domain	Beta-galactosidase 6 (Precursor) GN=BGAL6 OS=Arabidopsis thaliana (Mouse-ear cress) PE=2 SV=1	Beta-galactosidase [Medicago truncatula]
c125524.graph_c0	0	0	4.60718	3.57607	8.33e-09		up	Molecular Function: protein serine/threonine kinase activity (GO:0004674);; Molecular Function: ATP binding (GO:0005524);; Biological Process: protein phosphorylation (GO:0006468);;	[RTKL]	--	--	--	--	Protein tyrosine kinase;; Protein kinase domain;; DYW family of nucleic acid deaminases	Cysteine-rich receptor-like protein kinase 10 (Precursor) GN=F21P8.70 OS=Arabidopsis thaliana (Mouse-ear cress) PE=1 SV=3	Cysteine-rich receptor-like protein kinase [Medicago truncatula]
c125595.graph_c0	4.04273	3.37377	0.11285	0.510962	4.41e-05	-3.56583	down	--	--	--	--	--	--	--	F-box protein SKIP23 GN=SKIP23 OS=Arabidopsis thaliana (Mouse-ear cress) PE=1 SV=1	F-box protein [Medicago truncatula]
c125598.graph_c0	221.848	197.045	88.2647	58.2749	0.000385509	-1.61929	down	--	[O]	Posttranslational modification, protein turnover, chaperones	K00799|9.23102e-111|cam:101515160|probable glutathione S-transferase-like; K00799 glutathione S-transferase [EC:2.5.1.18] (A)	[O]	Posttranslational modification, protein turnover, chaperones	Glutathione S-transferase, N-terminal domain;; Glutathione S-transferase, N-terminal domain;; Glutathione S-transferase, C-terminal domain;; Glutathione S-transferase, C-terminal domain;; Glutathione S-transferase, N-terminal domain;; Glutathione S-transferase, C-terminal domain	Probable glutathione S-transferase OS=Nicotiana tabacum (Common tobacco) PE=2 SV=1	unknown [Medicago truncatula]
c125698.graph_c0	0	0	9.70253	7.73189	6.22e-18		up	--	--	--	--	--	--	--	--	--
c125702.graph_c0	1131.1	1111.21	185.81	77.6422	2.59e-10	-3.22493	down	Molecular Function: ATP binding (GO:0005524);; Biological Process: response to stress (GO:0006950);; Molecular Function: 2-alkenal reductase [NAD(P)] activity (GO:0032440);; Biological Process: oxidation-reduction process (GO:0055114);;	[O]	Posttranslational modification, protein turnover, chaperones	K03283|4.86217e-100|mtr:MTR_7g024390|Heat shock protein; K03283 heat shock 70kDa protein 1/8 (A)	[O]	Posttranslational modification, protein turnover, chaperones	Hsp70 protein	Heat shock 70 kDa protein 3 OS=Arabidopsis thaliana (Mouse-ear cress) PE=1 SV=1	Heat shock protein [Medicago truncatula]
c125704.graph_c0	3.9492	2.61187	0.277734	0.603613	0.00174008	-2.91434	down	--	--	--	--	--	--	F-box-like;; F-box domain	F-box/kelch-repeat protein At3g06240 GN=At3g06240 OS=Arabidopsis thaliana (Mouse-ear cress) PE=2 SV=1	galactose oxidase [Medicago truncatula]
c125799.graph_c0	10.1831	6.02681	38.0086	37.4733	7.53e-07	2.15736	up	Molecular Function: kinase activity (GO:0016301);; Biological Process: phosphorylation (GO:0016310);;	--	--	--	--	--	Leucine Rich Repeat;; Leucine Rich repeats (2 copies);; Leucine rich repeat;; Leucine rich repeat N-terminal domain;; Leucine Rich repeat;; Leucine rich repeat	Uncharacterized protein At4g06744 (Precursor) GN=At4g06744 OS=Arabidopsis thaliana (Mouse-ear cress) PE=2 SV=1	Serine/Threonine kinase, plant-type protein, putative [Medicago truncatula]
c125889.graph_c0	4.28389	3.08727	0	0.493947	6.21e-05	-3.84413	down	--	--	--	--	--	--	--	--	--
c125914.graph_c0	18.555	11.2034	0.142958	1.3593	5.51e-09	-4.26856	down	Molecular Function: transporter activity (GO:0005215);; Cellular Component: plasma membrane (GO:0005886);; Cellular Component: integral component of membrane (GO:0016021);; Biological Process: transmembrane transport (GO:0055085);;	--	--	--	[R]	General function prediction only	--	Protein ZINC INDUCED FACILITATOR-LIKE 1 GN=ZIFL1 OS=Arabidopsis thaliana (Mouse-ear cress) PE=2 SV=1	PREDICTED: protein ZINC INDUCED FACILITATOR 1-like [Cicer arietinum]
c125918.graph_c0	3.85264	2.24255	0.0408792	0.333168	1.7e-05	-3.98885	down	Molecular Function: nucleotide binding (GO:0000166);; Molecular Function: protein kinase activity (GO:0004672);; Cellular Component: membrane (GO:0016020);; Biological Process: phosphorylation (GO:0016310);; Biological Process: protein metabolic process (GO:0019538);; Biological Process: cellular macromolecule metabolic process (GO:0044260);;	--	--	--	[R]	General function prediction only	zinc-binding in reverse transcriptase	Putative ribonuclease H protein At1g65750 GN=At1g65750 OS=Arabidopsis thaliana (Mouse-ear cress) PE=3 SV=1	hypothetical protein MtrDRAFT_AC148971g30v2 [Medicago truncatula]
c125927.graph_c0	2.12146	1.21036	16.8582	8.77885	0.000299488	2.84286	up	Molecular Function: transferase activity, transferring acyl groups other than amino-acyl groups (GO:0016747);;	--	--	--	--	--	Transferase family	Coumaroyl-CoA:anthocyanidin 3-O-glucoside-6&apos;&apos;-O-coumaroyltransferase 1 GN=3AT1 OS=Arabidopsis thaliana (Mouse-ear cress) PE=1 SV=1	anthocyanin 5-aromatic acyltransferase [Medicago truncatula]
c125957.graph_c0	251.067	218.306	112.624	73.1798	0.0022905	-1.44109	down	Biological Process: transcription, DNA-templated (GO:0006351);; Biological Process: regulation of cellular process (GO:0050794);; Biological Process: response to stimulus (GO:0050896);;	--	--	K09286|1.15295e-100|mtr:MTR_4g100420|Ethylene-responsive transcription factor; K09286 EREBP-like factor (A)	--	--	AP2 domain	Ethylene-responsive transcription factor 6 OS=Arabidopsis thaliana (Mouse-ear cress) PE=2 SV=2	Ethylene-responsive transcription factor [Medicago truncatula]
c125962.graph_c0	67.1279	69.2721	29.3929	26.0347	0.00297755	-1.3904	down	Molecular Function: GTPase activity (GO:0003924);; Molecular Function: GTP binding (GO:0005525);; Cellular Component: endoplasmic reticulum membrane (GO:0005789);; Biological Process: GTP catabolic process (GO:0006184);; Cellular Component: integral component of membrane (GO:0016021);;	--	--	--	[R]	General function prediction only	Root hair defective 3 GTP-binding protein (RHD3);; 50S ribosome-binding GTPase;; Guanylate-binding protein, N-terminal domain	Protein ROOT HAIR DEFECTIVE 3 {ECO:0000255|HAMAP-Rule:MF_03109} GN=MCP4.11 OS=Arabidopsis thaliana (Mouse-ear cress) PE=1 SV=1	ROOT HAIR defective 3 GTP-binding family protein [Medicago truncatula]
c125971.graph_c0	2.23234	2.0401	9.37158	8.55846	0.00443289	1.98496	up	Biological Process: proteolysis (GO:0006508);; Biological Process: autophagy (GO:0006914);; Molecular Function: NEDD8-specific protease activity (GO:0019784);;	--	--	K08597|2.79837e-140|cam:101498866|NEDD8-specific protease 1-like; K08597 sentrin-specific protease 8 [EC:3.4.22.68] (A)	[R]	General function prediction only	Ulp1 protease family, C-terminal catalytic domain	NEDD8-specific protease 1 GN=F15L12.8 OS=Arabidopsis thaliana (Mouse-ear cress) PE=2 SV=1	PREDICTED: NEDD8-specific protease 1-like [Cicer arietinum]
c126022.graph_c0	5.75835	4.71253	17.8144	15.9051	0.000996403	1.60596	up	--	[Q]	Secondary metabolites biosynthesis, transport and catabolism	--	[Q]	Secondary metabolites biosynthesis, transport and catabolism	Multicopper oxidase;; Multicopper oxidase;; Multicopper oxidase	L-ascorbate oxidase homolog (Precursor) GN=Bp10 OS=Brassica napus (Rape) PE=2 SV=1	multi-copper oxidase-like protein [Medicago truncatula]
c126080.graph_c0	21.7559	11.4576	3.06423	0.979359	0.000648389	-3.16299	down	--	--	--	--	--	--	Domain of unknown function (DUF4228)	--	hypothetical protein MTR_1g108640 [Medicago truncatula]
c126093.graph_c0	0	0	9.73958	10.0938	1.01e-10		up	--	--	--	--	--	--	--	--	--
c126093.graph_c1	0.646567	0	4.88812	6.37415	3.98e-05	4.14156	up	--	--	--	--	--	--	--	--	--
c126123.graph_c0	0.441559	0.348816	3.6053	2.90206	0.0012858	2.95493	up	--	--	--	--	--	--	--	Probable esterase PIR7A OS=Oryza sativa subsp. japonica (Rice) PE=3 SV=2	PREDICTED: methylesterase 10-like isoform X1 [Cicer arietinum]
c126143.graph_c0	54.9875	54.8801	24.6545	21.3089	0.00484077	-1.34867	down	--	--	--	--	--	--	Phloem protein 2	Protein PHLOEM PROTEIN 2-LIKE A9 GN=PP2A9 OS=Arabidopsis thaliana (Mouse-ear cress) PE=2 SV=1	protein PHLOEM PROTEIN 2-LIKE A9-like [Cicer arietinum]
c126157.graph_c0	11.2201	0.260054	33.5818	29.8394	9.1e-06	2.45625	up	--	--	--	--	--	--	Transferase family	Uncharacterized acetyltransferase At3g50280 GN=At3g50280 OS=Arabidopsis thaliana (Mouse-ear cress) PE=3 SV=1	Acetyltransferase, putative [Medicago truncatula]
c126173.graph_c0	72.6491	39.9264	0.577667	10.9854	0.000232358	-3.22927	down	--	--	--	--	--	--	--	--	--
c126197.graph_c0	83.9058	64.1435	38.9718	16.26	0.00059524	-1.54793	down	--	[RTKL]	--	--	--	--	Protein kinase domain;; Protein tyrosine kinase;; Leucine Rich repeats (2 copies);; Leucine rich repeat;; Leucine Rich Repeat;; Leucine rich repeat;; Phosphotransferase enzyme family;; Leucine Rich repeat	Leucine-rich repeat receptor-like serine/threonine/tyrosine-protein kinase SOBIR1 (Precursor) GN=F20M17.8 OS=Arabidopsis thaliana (Mouse-ear cress) PE=1 SV=1	LRR receptor-like kinase family protein [Medicago truncatula]
c126211.graph_c0	28.8088	31.3884	11.5759	5.86595	0.000176574	-1.91577	down	--	--	--	--	[R]	General function prediction only	AN1-like Zinc finger	Zinc finger AN1 domain-containing stress-associated protein 12 GN=T19D11.2 OS=Arabidopsis thaliana (Mouse-ear cress) PE=2 SV=2	unknown [Medicago truncatula]
c126265.graph_c0	3.3999	1.72167	0.0263627	0.0238731	6.64e-07	-6.73322	down	--	--	--	--	--	--	--	--	--
c126279.graph_c0	6.05409	4.4338	0.028606	0.595804	6.67e-08	-4.02633	down	--	--	--	--	--	--	--	--	--
c126293.graph_c1	0.521537	0.137332	4.25831	3.99898	0.00016324	3.60989	up	--	--	--	--	--	--	--	--	--
c126353.graph_c0	2.91533	1.53534	0	0.441641	0.001608	-3.26551	down	--	--	--	--	--	--	--	--	--
c126355.graph_c0	83.9279	65.6687	17.3115	7.37968	1.86e-10	-2.72417	down	--	--	--	--	--	--	--	--	hypothetical protein MTR_3g032740 [Medicago truncatula]
c126359.graph_c0	56.0138	37.1723	9.13924	13.0747	1.91e-06	-2.11134	down	--	--	--	--	[GC]	--	UDP-glucoronosyl and UDP-glucosyl transferase	7-deoxyloganetin glucosyltransferase GN=UGT85A24 OS=Gardenia jasminoides (Cape jasmine) PE=1 SV=1	Cytokinin-O-glucosyltransferase [Medicago truncatula]
c126398.graph_c0	2.47273	1.92135	0	0	1.49e-08		down	--	--	--	K03025|1.16316e-16|mtr:MTR_7g020790|DNA-directed RNA polymerase III subunit RPC6; K03025 DNA-directed RNA polymerase III subunit RPC6 (A)	--	--	Reverse transcriptase-like	--	unknown [Medicago truncatula]
c126404.graph_c0	0.597758	0.20987	3.13326	4.65617	0.00406633	3.25257	up	--	--	--	--	--	--	--	--	PREDICTED: micronuclear linker histone polyprotein-like [Cicer arietinum]
c126457.graph_c0	4.74961	3.19845	15.352	17.1716	0.000117905	1.974	up	--	--	--	K15115|0|mtr:MTR_5g055410|Mitochondrial substrate carrier family protein W; K15115 solute carrier family 25 (mitochondrial folate transporter), member 32 (A)	[C]	Energy production and conversion	Mitochondrial carrier protein	Nicotinamide adenine dinucleotide transporter 2, mitochondrial GN=F4F7.45 OS=Arabidopsis thaliana (Mouse-ear cress) PE=1 SV=1	Mitochondrial substrate carrier family protein W [Medicago truncatula]
c126459.graph_c0	10.1533	7.01985	2.99167	2.79469	0.00961007	-1.64093	down	--	[RTKL]	--	--	[T]	Signal transduction mechanisms	Protein kinase domain;; Protein tyrosine kinase	Probable receptor-like protein kinase At1g67000 (Precursor) GN=At1g67000 OS=Arabidopsis thaliana (Mouse-ear cress) PE=2 SV=2	PREDICTED: probable receptor-like protein kinase At1g67000-like [Cicer arietinum]
c126514.graph_c0	1.0314	1.04202	5.95796	5.02639	0.000914829	2.31183	up	Molecular Function: hydrolase activity, hydrolyzing O-glycosyl compounds (GO:0004553);; Biological Process: carbohydrate metabolic process (GO:0005975);;	--	--	--	--	--	Glycosyl hydrolases family 17;; X8 domain	Glucan endo-1,3-beta-glucosidase 3 (Precursor) GN=At2g01630 OS=Arabidopsis thaliana (Mouse-ear cress) PE=1 SV=2	PREDICTED: glucan endo-1,3-beta-glucosidase 12-like isoform X2 [Cicer arietinum]
c126558.graph_c0	42.0667	47.0249	16.2069	10.676	2.39e-05	-1.84213	down	Biological Process: protein homooligomerization (GO:0051260);;	--	--	--	[R]	General function prediction only	BTB/POZ domain	BTB/POZ domain-containing protein At5g41330 GN=At5g41330 OS=Arabidopsis thaliana (Mouse-ear cress) PE=2 SV=1	BTB/POZ domain plant protein [Medicago truncatula]
c126604.graph_c0	13.9812	13.778	6.57808	0.986101	6.66e-05	-2.05631	down	--	--	--	--	--	--	--	--	dentin sialophosphoprotein-like protein, putative [Medicago truncatula]
c126611.graph_c0	66.1473	66.9219	28.9521	21.3318	0.00426365	-1.50633	down	Molecular Function: Rab GTPase activator activity (GO:0005097);; Biological Process: positive regulation of Rab GTPase activity (GO:0032851);;	[R]	General function prediction only	--	[R]	General function prediction only	Rab-GTPase-TBC domain	--	TBC1 domain family member [Medicago truncatula]
c126629.graph_c0	0.400335	0.579793	44.0468	14.4712	0.00433884	5.73579	up	Molecular Function: ATP binding (GO:0005524);; Biological Process: ATP catabolic process (GO:0006200);; Cellular Component: membrane (GO:0016020);; Molecular Function: ATPase activity (GO:0016887);;	[V]	Defense mechanisms	--	[Q]	Secondary metabolites biosynthesis, transport and catabolism	ABC-2 type transporter;; ABC transporter;; AAA ATPase domain;; AAA domain	ABC transporter G family member 2 GN=F3G5.15 OS=Arabidopsis thaliana (Mouse-ear cress) PE=2 SV=1	ABC transporter G family member [Medicago truncatula]
c126644.graph_c0	4.61316	2.29344	0.0446413	0.768084	0.00766198	-3.03055	down	--	--	--	--	--	--	--	--	PREDICTED: uncharacterized protein LOC101501156 [Cicer arietinum]
c126706.graph_c0	3.58398	2.06847	10.4521	8.60456	0.00693445	1.68072	up	Biological Process: cell fate specification (GO:0001708);; Biological Process: amino acid transmembrane transport (GO:0003333);; Molecular Function: L-tyrosine transmembrane transporter activity (GO:0005302);; Biological Process: purine nucleobase transport (GO:0006863);; Biological Process: tyrosine transport (GO:0015828);; Cellular Component: membrane (GO:0016020);;	[E]	Amino acid transport and metabolism	K03834|0|mtr:MTR_6g032780|Tyrosine-specific transport protein; K03834 tyrosine-specific transport protein (A)	--	--	Tryptophan/tyrosine permease family	--	Tyrosine-specific transport protein [Medicago truncatula]
c126715.graph_c0	1.71664	1.77044	29.633	20.2532	4.48e-13	3.73065	up	Biological Process: metabolic process (GO:0008152);; Molecular Function: transferase activity, transferring hexosyl groups (GO:0016758);;	--	--	--	[GC]	--	UDP-glucoronosyl and UDP-glucosyl transferase	Anthocyanidin 5,3-O-glucosyltransferase GN=RhGT1 OS=Rosa hybrid cultivar PE=2 SV=1	UDP-glucosyltransferase family protein [Medicago truncatula]
c126725.graph_c0	0.148082	0.0584898	6.96339	13.8078	0.000619444	6.64767	up	--	--	--	--	--	--	--	--	--
c126730.graph_c0	15.1142	7.98841	0.822049	1.72705	0.000416312	-3.19137	down	--	--	--	--	--	--	--	--	--
c126745.graph_c0	35.1027	31.3732	15.3183	13.2068	0.00531267	-1.30771	down	Biological Process: drug transmembrane transport (GO:0006855);; Molecular Function: drug transmembrane transporter activity (GO:0015238);; Molecular Function: antiporter activity (GO:0015297);; Cellular Component: membrane (GO:0016020);;	[V]	Defense mechanisms	K03327|0|mtr:MTR_6g081810|hypothetical protein; K03327 multidrug resistance protein, MATE family (A)	[R]	General function prediction only	MatE	MATE efflux family protein 9 GN=F3L12.7 OS=Arabidopsis thaliana (Mouse-ear cress) PE=2 SV=1	MATE efflux family protein [Medicago truncatula]
c126786.graph_c0	0.863102	0.757579	6.49615	3.309	0.00733861	2.47745	up	Biological Process: response to molecule of fungal origin (GO:0002238);; Molecular Function: protein serine/threonine kinase activity (GO:0004674);; Molecular Function: ATP binding (GO:0005524);; Biological Process: protein phosphorylation (GO:0006468);; Biological Process: response to stress (GO:0006950);;	[RTKL]	--	--	[T]	Signal transduction mechanisms	Protein kinase domain;; Protein tyrosine kinase	Probable receptor-like serine/threonine-protein kinase At5g57670 GN=At5g57670 OS=Arabidopsis thaliana (Mouse-ear cress) PE=2 SV=1	receptor-like kinase [Medicago truncatula]
c126813.graph_c0	0	0.0879337	3.23152	5.94413	0.00143201	6.58153	up	--	--	--	--	--	--	--	--	--
c126813.graph_c1	0	0.0177045	1.76891	3.4983	0.000317736	8.09718	up	--	--	--	--	--	--	--	--	--
c126850.graph_c0	525.517	457.252	226.94	137.242	0.00702168	-1.54086	down	Molecular Function: magnesium ion binding (GO:0000287);; Molecular Function: electron carrier activity (GO:0009055);; Cellular Component: photosystem I (GO:0009522);; Cellular Component: chloroplast thylakoid membrane (GO:0009535);; Biological Process: photosynthesis (GO:0015979);; Cellular Component: integral component of membrane (GO:0016021);; Molecular Function: chlorophyll binding (GO:001616…	--	--	K02689|0|mtr:MetrCp066|psaA; photosystem I P700 chlorophyll a apoprotein A1; K02689 photosystem I P700 chlorophyll a apoprotein A1 (A)	--	--	Photosystem I psaA/psaB protein;; TPR repeat;; Tetratricopeptide repeat;; Tetratricopeptide repeat;; Tetratricopeptide repeat;; Tetratricopeptide repeat;; Tetratricopeptide repeat;; Tetratricopeptide repeat	Photosystem I P700 chlorophyll a apoprotein A1 {ECO:0000255|HAMAP-Rule:MF_00458} OS=Pisum sativum (Garden pea) PE=1 SV=2	photosystem I P700 chlorophyll A apoprotein A2 [Medicago truncatula]
c126901.graph_c0	0.237715	0.625955	4.45694	4.55681	0.000452761	3.26668	up	--	--	--	--	--	--	Leucine Rich Repeat	Polygalacturonase inhibitor (Precursor) GN=PGIP OS=Pyrus communis (Pear) PE=1 SV=1	polygalacturonase inhibitor [Medicago truncatula]
c126901.graph_c1	0.110068	0.115933	5.85817	2.10992	0.00909771	4.99336	up	--	--	--	--	--	--	Leucine rich repeat N-terminal domain;; Leucine Rich repeats (2 copies);; Leucine Rich Repeat;; Leucine rich repeat	Polygalacturonase inhibitor {ECO:0000250|UniProtKB:P58822} (Precursor) GN=pgip OS=Vitis vinifera (Grape) PE=1 SV=1	polygalacturonase inhibitor [Medicago truncatula]
c126910.graph_c0	3.03443	2.83086	14.2276	11.1745	0.000354608	2.01978	up	--	--	--	--	--	--	Protein of unknown function (DUF3772)	F-box protein CPR30 GN=CPR30 OS=Arabidopsis thaliana (Mouse-ear cress) PE=1 SV=2	PREDICTED: F-box/kelch-repeat protein At3g06240-like [Cicer arietinum]
c126929.graph_c0	2.70964	1.62769	23.3532	11.7565	0.000633778	2.91199	up	--	--	--	K15803|0|cam:101501402|(-)-germacrene D synthase-like; K15803 (-)-germacrene D synthase [EC:4.2.3.22 4.2.3.75] (A)	--	--	Terpene synthase family, metal binding domain;; Terpene synthase, N-terminal domain	(-)-germacrene D synthase OS=Vitis vinifera (Grape) PE=1 SV=1	wound-inducible putative cytosolic terpene synthase 1 [Medicago truncatula]
c126953.graph_c0	7.04772	5.40176	19.9045	19.8513	0.00224116	1.60367	up	--	--	--	K03538|4.32257e-149|mtr:MTR_5g007880|Ribonuclease P protein subunit p29; K03538 ribonuclease P protein subunit POP4 [EC:3.1.26.5] (A)	[A]	RNA processing and modification	Domain of unknown function UPF0086	--	ribonuclease P family protein, putative [Medicago truncatula]
c127017.graph_c1	7.51348	5.79063	0.886678	1.40515	0.00652942	-2.57974	down	--	--	--	--	--	--	--	--	--
c127043.graph_c1	51.6591	36.7778	12.2736	6.39083	2.44e-08	-2.35405	down	--	[J]	Translation, ribosomal structure and biogenesis	--	--	--	Plant protein of unknown function (DUF825);; ATPase family associated with various cellular activities (AAA);; NADH-Ubiquinone/plastoquinone (complex I), various chains;; Ribosomal protein S7p/S5e;; NADH-Ubiquinone/plastoquinone (complex I), various chains;; Ribosomal protein S12/S23	Protein Ycf2 {ECO:0000255|HAMAP-Rule:MF_01330} OS=Lotus japonicus (Lotus corniculatus var. japonicus) PE=3 SV=1	hypothetical chloroplast RF21 [Vicia faba]
c127061.graph_c0	19.817	13.3827	4.9089	4.56994	3.88e-05	-1.87918	down	Molecular Function: transferase activity, transferring glycosyl groups (GO:0016757);;	--	--	--	[S]	Function unknown	Protein of unknown function (DUF563)	--	Glycosyltransferase [Medicago truncatula]
c127068.graph_c0	29.9026	26.6804	1.06138	8.97911	8.17e-09	-2.47322	down	Molecular Function: RNA binding (GO:0003723);; Molecular Function: RNA-directed DNA polymerase activity (GO:0003964);; Molecular Function: iron ion binding (GO:0005506);; Biological Process: RNA-dependent DNA replication (GO:0006278);; Molecular Function: electron carrier activity (GO:0009055);; Molecular Function: oxidoreductase activity, acting on paired donors, with incorporation or reduction …	[Q]	Secondary metabolites biosynthesis, transport and catabolism	--	[QI]	--	Cytochrome P450;; Cytochrome P450	Beta-amyrin 28-oxidase OS=Panax ginseng (Korean ginseng) PE=2 SV=1	PREDICTED: beta-amyrin 28-oxidase-like [Populus euphratica]
c127075.graph_c0	13.3851	10.5268	1.43919	0.439854	1.2e-14	-3.81255	down	Cellular Component: ubiquitin ligase complex (GO:0000151);; Molecular Function: ubiquitin-protein ligase activity (GO:0004842);; Biological Process: protein ubiquitination (GO:0016567);;	--	--	--	[S]	Function unknown	U-box domain;; Armadillo/beta-catenin-like repeat;; Neurochondrin;; Zinc-finger of the MIZ type in Nse subunit	U-box domain-containing protein 19 GN=PUB19 OS=Arabidopsis thaliana (Mouse-ear cress) PE=2 SV=1	U-box domain-containing protein [Medicago truncatula]
c127090.graph_c0	254.245	191.786	73.7821	68.0538	0.000102775	-1.72875	down	Molecular Function: 3-oxoacyl-[acyl-carrier-protein] reductase (NADPH) activity (GO:0004316);; Biological Process: oxidation-reduction process (GO:0055114);;	[IQR]	--	--	[R]	General function prediction only	Enoyl-(Acyl carrier protein) reductase;; short chain dehydrogenase	Secoisolariciresinol dehydrogenase (Fragment) OS=Forsythia intermedia (Border forsythia) PE=1 SV=1	short-chain dehydrogenase/reductase [Medicago truncatula]
c127151.graph_c0	3.19223	0.294511	16.1783	14.1655	3.74e-09	3.10029	up	Molecular Function: oxidoreductase activity, acting on diphenols and related substances as donors, oxygen as acceptor (GO:0016682);; Biological Process: single-organism metabolic process (GO:0044710);;	--	--	--	--	--	Common central domain of tyrosinase;; Protein of unknown function (DUF_B2219)	Polyphenol oxidase, chloroplastic (Precursor) OS=Malus domestica (Apple) PE=2 SV=1	hypothetical protein PHAVU_008G073200g [Phaseolus vulgaris]
c127242.graph_c0	27.1289	20.8707	10.5912	7.14506	0.000690975	-1.53311	down	--	--	--	--	--	--	GRAS domain family	Scarecrow-like protein 14 GN=SCL14 OS=Arabidopsis thaliana (Mouse-ear cress) PE=2 SV=2	SCARECROW-like protein [Medicago truncatula]
c127261.graph_c1	0.233526	0	5.22583	7.67401	2.45e-05	5.81402	up	Molecular Function: 3-dehydroquinate dehydratase activity (GO:0003855);; Molecular Function: shikimate 3-dehydrogenase (NADP+) activity (GO:0004764);; Biological Process: oxidation-reduction process (GO:0055114);;	[E]	Amino acid transport and metabolism	K13832|3.77977e-23|mdm:103436731|bifunctional 3-dehydroquinate dehydratase/shikimate dehydrogenase, chloroplastic-like; K13832 3-dehydroquinate dehydratase / shikimate dehydrogenase [EC:4.2.1.10 1.1.1.25] (A)	[E]	Amino acid transport and metabolism	--	Shikimate dehydrogenase (Precursor) GN=EMB3004 OS=Arabidopsis thaliana (Mouse-ear cress) PE=1 SV=1	PREDICTED: bifunctional 3-dehydroquinate dehydratase/shikimate dehydrogenase, chloroplastic-like [Malus domestica]
c127287.graph_c0	17.7382	7.89623	38.0072	32.8922	0.00606711	1.40794	up	Cellular Component: integral component of membrane (GO:0016021);; Molecular Function: cellulose synthase (UDP-forming) activity (GO:0016760);; Biological Process: cellulose biosynthetic process (GO:0030244);;	[M]	Cell wall/membrane/envelope biogenesis	--	--	--	Cellulose synthase	Cellulose synthase-like protein E6 GN=P0556A05.32 OS=Oryza sativa subsp. japonica (Rice) PE=2 SV=1	Cellulose synthase-like protein E1 [Medicago truncatula]
c127330.graph_c0	0.948859	0.347625	6.43742	4.4286	0.000656854	2.9993	up	--	--	--	--	--	--	PGAP1-like protein	--	PREDICTED: uncharacterized protein LOC103402664 [Malus domestica]
c127354.graph_c0	0.624843	0.493604	3.4012	3.50777	0.0069836	2.55651	up	Cellular Component: membrane (GO:0016020);; Biological Process: metal ion transport (GO:0030001);; Molecular Function: metal ion transmembrane transporter activity (GO:0046873);; Biological Process: transmembrane transport (GO:0055085);;	--	--	--	--	--	CorA-like Mg2+ transporter protein	--	PREDICTED: uncharacterized protein LOC101508823 isoform X1 [Cicer arietinum]
c127360.graph_c0	9.10472	2.74296	31.5729	20.556	3.88e-05	2.0723	up	--	--	--	--	--	--	Glyoxal oxidase N-terminus;; Domain of unknown function (DUF1929)	--	glyoxal oxidase amino-terminal protein [Medicago truncatula]
c127362.graph_c0	20.2978	16.0967	53.2536	45.6652	0.00334808	1.35994	up	--	[RTKL]	--	--	[T]	Signal transduction mechanisms	Protein tyrosine kinase;; Protein kinase domain;; Protein tyrosine kinase	Protein kinase APK1A, chloroplastic (Precursor) GN=APK1A OS=Arabidopsis thaliana (Mouse-ear cress) PE=2 SV=1	kinase 1B [Medicago truncatula]
c127405.graph_c0	16.3888	16.5539	1.72826	1.1968	3.02e-06	-3.59964	down	--	--	--	--	--	--	--	--	--
c127417.graph_c0	22.746	19.2904	52.7147	61.4329	0.00308573	1.37571	up	--	--	--	--	--	--	Pectinesterase;; Plant invertase/pectin methylesterase inhibitor	Pectinesterase 61 GN=K19E1.17 OS=Arabidopsis thaliana (Mouse-ear cress) PE=2 SV=1	Pectinesterase [Medicago truncatula]
c127428.graph_c0	0	0	17.4492	18.2263	4.42e-17		up	--	--	--	--	[YU]	--	--	--	importin-like protein [Medicago truncatula]
c127435.graph_c0	186.806	124.859	6.36741	6.64844	1.9e-20	-4.64461	down	Molecular Function: metal ion binding (GO:0046872);;	--	--	--	[R]	General function prediction only	Ankyrin repeat;; Ankyrin repeats (3 copies);; Ankyrin repeats (many copies);; Ankyrin repeat	Zinc finger CCCH domain-containing protein 47 GN=At3g55980 OS=Arabidopsis thaliana (Mouse-ear cress) PE=2 SV=1	Zinc finger CCCH domain-containing protein [Medicago truncatula]
c127437.graph_c0	10.47	8.88814	128.419	56.0808	0.00740412	3.1255	up	--	[V]	Defense mechanisms	K03327|0|cam:101496368|MATE efflux family protein ALF5-like; K03327 multidrug resistance protein, MATE family (A)	[R]	General function prediction only	MatE	MATE efflux family protein LAL5 GN=MDB19.3 OS=Arabidopsis thaliana (Mouse-ear cress) PE=2 SV=1	MATE efflux family protein [Medicago truncatula]
c127447.graph_c0	2.00615	1.05653	10.6504	10.1329	0.00411733	2.70281	up	--	--	--	--	--	--	--	--	--
c127452.graph_c0	22.4385	22.0785	543.259	388.648	4.25e-19	4.28469	up	--	--	--	--	[O]	Posttranslational modification, protein turnover, chaperones	Papain family cysteine protease;; Cathepsin propeptide inhibitor domain (I29)	Cysteine proteinase RD21a (Precursor) GN=RD21A OS=Arabidopsis thaliana (Mouse-ear cress) PE=1 SV=1	NTH1 [Pisum sativum]
c127486.graph_c0	0.327544	0.451151	2.77342	2.12512	0.00575641	2.54099	up	--	--	--	--	--	--	Subtilase family;; PA domain;; Peptidase inhibitor I9	Subtilisin-like protease SBT3.5 {ECO:0000303|PubMed:16193095} (Precursor) OS=Arabidopsis thaliana (Mouse-ear cress) PE=1 SV=1	subtilisin-like serine protease [Medicago truncatula]
c127486.graph_c1	0.676489	0.665035	5.61895	3.01346	0.00561302	2.56486	up	Molecular Function: serine-type endopeptidase activity (GO:0004252);; Biological Process: proteolysis (GO:0006508);; Molecular Function: identical protein binding (GO:0042802);; Biological Process: negative regulation of catalytic activity (GO:0043086);;	--	--	--	--	--	Subtilase family	CO(2)-response secreted protease {ECO:0000303|PubMed:25043023} (Precursor) OS=Arabidopsis thaliana (Mouse-ear cress) PE=2 SV=1	subtilisin-like serine protease [Medicago truncatula]
c127488.graph_c0	0.45276	0.303473	2.73833	2.11904	0.00744567	2.6008	up	--	--	--	--	--	--	--	--	F-box protein interaction domain protein [Medicago truncatula]
c127515.graph_c0	1.03768	1.03052	5.93527	3.60482	0.00111083	2.09184	up	--	[L]	Replication, recombination and repair	K10747|0|cam:101509971|DNA ligase 1-like; K10747 DNA ligase 1 [EC:6.5.1.1 6.5.1.6 6.5.1.7] (A)	[L]	Replication, recombination and repair	ATP dependent DNA ligase domain;; DNA ligase N terminus;; ATP dependent DNA ligase C terminal region	DNA ligase 1 (Precursor) GN=LIG1 OS=Arabidopsis thaliana (Mouse-ear cress) PE=2 SV=2	DNA ligase I, ATP-dependent protein [Medicago truncatula]
c127543.graph_c1	2.92256	4.44643	21.9967	27.3892	0.00481938	2.65977	up	--	--	--	--	--	--	--	Cysteine proteinase inhibitor 6 (Precursor) GN=CYS6 OS=Arabidopsis thaliana (Mouse-ear cress) PE=1 SV=2	Cysteine proteinase inhibitor [Medicago truncatula]
c127557.graph_c0	3.53477	3.33987	0.0628784	0.427052	1.03e-05	-3.79715	down	Cellular Component: membrane (GO:0016020);; Cellular Component: intracellular membrane-bounded organelle (GO:0043231);; Cellular Component: cytoplasmic part (GO:0044444);;	--	--	--	--	--	NHL repeat	--	hypothetical protein MTR_7g020840 [Medicago truncatula]
c127580.graph_c0	8.49977	9.88936	1.52596	3.51126	0.000528539	-1.9062	down	--	--	--	--	[R]	General function prediction only	PPR repeat family;; PPR repeat;; PPR repeat;; Pentatricopeptide repeat domain;; PPR repeat family;; PPR repeat;; PPR repeat	Putative pentatricopeptide repeat-containing protein At5g08310, mitochondrial (Precursor) GN=At5g08310 OS=Arabidopsis thaliana (Mouse-ear cress) PE=3 SV=1	PREDICTED: uncharacterized protein LOC101514261 [Cicer arietinum]
c127582.graph_c0	2.68196	2.87719	0	0.217613	5.82e-06	-4.63588	down	Molecular Function: transmembrane transporter activity (GO:0022857);; Biological Process: single-organism transport (GO:0044765);;	[GEPR]	--	K08176|1.45663e-17|pvu:PHAVU_001G160600g|hypothetical protein; K08176 MFS transporter, PHS family, inorganic phosphate transporter (A)	[P]	Inorganic ion transport and metabolism	--	Probable inorganic phosphate transporter 1-7 GN=PHT1-7 OS=Arabidopsis thaliana (Mouse-ear cress) PE=2 SV=2	high affinity inorganic phosphate transporter [Medicago truncatula]
c127658.graph_c0	51.4761	38.1744	15.2306	11.6017	2.14e-05	-1.82787	down	Molecular Function: transferase activity, transferring glycosyl groups (GO:0016757);;	--	--	--	--	--	Glycosyl transferase family 8	Probable galacturonosyltransferase-like 7 GN=GATL7 OS=Arabidopsis thaliana (Mouse-ear cress) PE=2 SV=1	PREDICTED: probable galacturonosyltransferase-like 7-like isoform X1 [Cicer arietinum]
c127696.graph_c0	1189.81	1268.71	220.858	163	5.73e-08	-2.7835	down	Molecular Function: iron ion binding (GO:0005506);; Cellular Component: chloroplast thylakoid membrane (GO:0009535);; Biological Process: photosynthetic electron transport in photosystem I (GO:0009773);; Biological Process: leaf morphogenesis (GO:0009965);; Biological Process: cell differentiation (GO:0030154);; Biological Process: positive regulation of transcription, DNA-templated (GO:0045893);;	[C]	Energy production and conversion	--	--	--	Rubredoxin	--	Rubredoxin [Medicago truncatula]
c127722.graph_c0	0.0918299	0.193447	4.22101	3.11826	7.27e-06	4.55472	up	--	--	--	--	--	--	--	--	--
c127748.graph_c0	24.9163	14.4904	5.60074	6.23943	0.0048571	-1.78808	down	Cellular Component: endoplasmic reticulum membrane (GO:0005789);; Molecular Function: transferase activity, transferring hexosyl groups (GO:0016758);;	--	--	K03848|0|cam:101508658|probable dolichyl pyrophosphate Man9GlcNAc2 alpha-1,3-glucosyltransferase-like; K03848 alpha-1,3-glucosyltransferase [EC:2.4.1.267] (A)	[GE]	--	ALG6, ALG8 glycosyltransferase family;; ALG6, ALG8 glycosyltransferase family	Probable dolichyl pyrophosphate Man9GlcNAc2 alpha-1,3-glucosyltransferase GN=At5g38460 OS=Arabidopsis thaliana (Mouse-ear cress) PE=2 SV=1	PREDICTED: probable dolichyl pyrophosphate Man9GlcNAc2 alpha-1,3-glucosyltransferase-like [Cicer arietinum]
c127762.graph_c0	2.92444	1.55997	8.85125	9.80265	4.54e-05	2.00608	up	Biological Process: maltose metabolic process (GO:0000023);; Molecular Function: alpha-amylase activity (GO:0004556);; Biological Process: starch catabolic process (GO:0005983);; Biological Process: pentose-phosphate shunt (GO:0006098);; Cellular Component: chloroplast stroma (GO:0009570);; Biological Process: plant-type cell wall organization (GO:0009664);; Molecular Function: limit dextrinase a…	[G]	Carbohydrate transport and metabolism	--	[G]	Carbohydrate transport and metabolism	Carbohydrate-binding module 48 (Isoamylase N-terminal domain);; Alpha amylase, catalytic domain;; Domain of unknown function (DUF3372)	Pullulanase 1, chloroplastic (Precursor) GN=T19N18.90 OS=Arabidopsis thaliana (Mouse-ear cress) PE=2 SV=2	PREDICTED: pullulanase 1, chloroplastic-like isoform X1 [Cicer arietinum]
c127770.graph_c0	3.75686	1.67745	0	0.223653	0.00209592	-4.52915	down	--	--	--	--	--	--	Arabidopsis protein of unknown function	--	unknown [Medicago truncatula]
c127795.graph_c0	0.361178	0.095106	1.58372	1.97814	0.00238055	2.94527	up	Molecular Function: GTPase activity (GO:0003924);; Molecular Function: GTP binding (GO:0005525);; Cellular Component: vacuolar membrane (GO:0005774);; Cellular Component: cytosol (GO:0005829);; Cellular Component: microtubule (GO:0005874);; Cellular Component: plasma membrane (GO:0005886);; Biological Process: GTP catabolic process (GO:0006184);; Cellular Component: cell plate (GO:0009504);; Cell…	--	--	--	[UR]	--	--	Dynamin-related protein 5A OS=Glycine max (Soybean) PE=2 SV=1	PREDICTED: dynamin-related protein 5A-like [Citrus sinensis]
c127846.graph_c1	11.1212	12.0013	38.9955	32.286	0.00100503	1.5268	up	Molecular Function: acylphosphatase activity (GO:0003998);;	[C]	Energy production and conversion	K01512|1.34254e-65|gmx:100796414|uncharacterized LOC100796414; K01512 acylphosphatase [EC:3.6.1.7] (A)	[C]	Energy production and conversion	Acylphosphatase;; Ribosomal L18p/L5e family	--	PREDICTED: uncharacterized protein LOC100796414 isoform X1 [Glycine max]
c127853.graph_c0	242.574	130.43	23.1283	18.4895	0.000137646	-3.23574	down	Molecular Function: ATP binding (GO:0005524);; Molecular Function: nucleoside-triphosphatase activity (GO:0017111);;	[O]	Posttranslational modification, protein turnover, chaperones	--	[O]	Posttranslational modification, protein turnover, chaperones	Domain associated at C-terminal with AAA;; ATPase family associated with various cellular activities (AAA);; Holliday junction DNA helicase ruvB N-terminus	26S protease regulatory subunit 6A homolog B GN=F7G19.2 OS=Arabidopsis thaliana (Mouse-ear cress) PE=1 SV=3	Mitochondrial chaperone BCS1 [Medicago truncatula]
c127878.graph_c0	8.5337	6.84414	28.8761	19.5507	0.00126298	1.55671	up	Molecular Function: nucleotide binding (GO:0000166);; Cellular Component: cytosol (GO:0005829);; Biological Process: fatty acid beta-oxidation (GO:0006635);; Molecular Function: zinc ion binding (GO:0008270);; Biological Process: systemic acquired resistance (GO:0009627);; Molecular Function: oxidoreductase activity, acting on the CH-OH group of donors, NAD or NADP as acceptor (GO:0016616);; Biol…	[R]	General function prediction only	--	[Q]	Secondary metabolites biosynthesis, transport and catabolism	Alcohol dehydrogenase GroES-like domain;; Zinc-binding dehydrogenase	Probable cinnamyl alcohol dehydrogenase 1 GN=F28P22.13 OS=Arabidopsis thaliana (Mouse-ear cress) PE=2 SV=1	Cinnamyl alcohol dehydrogenase [Medicago truncatula]
c127890.graph_c0	2.59639	3.26305	0.214135	0.517099	0.000761813	-3.04098	down	Molecular Function: translation elongation factor activity (GO:0003746);; Molecular Function: GTPase activity (GO:0003924);; Molecular Function: ATP binding (GO:0005524);; Molecular Function: GTP binding (GO:0005525);; Cellular Component: cytoplasm (GO:0005737);; Biological Process: GTP catabolic process (GO:0006184);; Biological Process: translational elongation (GO:0006414);; Molecular Function…	[O]	Posttranslational modification, protein turnover, chaperones	--	[O]	Posttranslational modification, protein turnover, chaperones	ATPase family associated with various cellular activities (AAA);; Holliday junction DNA helicase ruvB N-terminus;; AAA domain (dynein-related subfamily)	Katanin p60 ATPase-containing subunit A1 {ECO:0000255|HAMAP-Rule:MF_03023} GN=At1g80350 OS=Arabidopsis thaliana (Mouse-ear cress) PE=1 SV=1	P-loop nucleoside triphosphate hydrolase superfamily protein [Medicago truncatula]
c127911.graph_c0	22.2302	18.7023	8.11774	7.32048	0.00270537	-1.48846	down	Molecular Function: protein serine/threonine kinase activity (GO:0004674);; Molecular Function: ATP binding (GO:0005524);; Biological Process: protein phosphorylation (GO:0006468);; Molecular Function: carbohydrate binding (GO:0030246);;	[RTKL]	--	--	--	--	Protein kinase domain;; Protein tyrosine kinase	L-type lectin-domain containing receptor kinase IV.1 (Precursor) GN=F13M22.21 OS=Arabidopsis thaliana (Mouse-ear cress) PE=2 SV=1	lectin-like receptor kinase 7;2 [Medicago truncatula]
c127935.graph_c0	184.841	112.406	40.9453	28.6717	0.00010383	-2.17921	down	--	--	--	--	--	--	--	--	hypothetical protein MTR_3g028470 [Medicago truncatula]
c127972.graph_c0	0.248543	0.0523574	4.89045	3.93855	4.57e-10	4.83304	up	Molecular Function: metal ion binding (GO:0046872);;	--	--	--	--	--	Zinc finger C-x8-C-x5-C-x3-H type (and similar)	Zinc finger CCCH domain-containing protein 38 GN=At3g18640 OS=Arabidopsis thaliana (Mouse-ear cress) PE=2 SV=1	Zinc finger CCCH domain-containing protein [Medicago truncatula]
c128004.graph_c2	175.302	123.386	18.2327	36.2258	3.11e-09	-2.48102	down	Molecular Function: oxidoreductase activity, acting on paired donors, with incorporation or reduction of molecular oxygen, 2-oxoglutarate as one donor, and incorporation of one atom each of oxygen into both donors (GO:0016706);; Biological Process: oxidation-reduction process (GO:0055114);;	[R]	General function prediction only	--	[QR]	--	2OG-Fe(II) oxygenase superfamily;; non-haem dioxygenase in morphine synthesis N-terminal	Protein SRG1 GN=SRG1 OS=Arabidopsis thaliana (Mouse-ear cress) PE=2 SV=1	Protein SRG1 [Medicago truncatula]
c128014.graph_c0	7.05366	5.40329	0.736875	1.40481	0.00059056	-2.57149	down	--	--	--	--	--	--	--	--	--
c128026.graph_c0	23.8568	25.9355	115.037	113.257	7.81e-07	2.11041	up	Biological Process: flavonoid biosynthetic process (GO:0009813);; Molecular Function: chalcone isomerase activity (GO:0045430);;	--	--	K01859|1.06875e-136|mtr:MTR_1g115870|Chalcone-flavonone isomerase; K01859 chalcone isomerase [EC:5.5.1.6] (A)	--	--	Chalcone-flavanone isomerase;; Chalcone-flavanone isomerase	Chalcone--flavonone isomerase 2 GN=CHI2 OS=Lotus japonicus (Lotus corniculatus var. japonicus) PE=1 SV=1	Chalcone-flavonone isomerase [Medicago truncatula]
c128085.graph_c0	10.4256	5.98444	119.104	149.065	1.55e-08	3.9851	up	--	--	--	--	--	--	NYN domain	--	hypothetical protein EUTSA_v10003587mg [Eutrema salsugineum]
c128129.graph_c0	11.3777	3.98762	386.347	373.931	1.43e-26	5.58442	up	Molecular Function: iron ion binding (GO:0005506);; Molecular Function: linoleate 13S-lipoxygenase activity (GO:0016165);; Biological Process: oxylipin biosynthetic process (GO:0031408);; Biological Process: oxidation-reduction process (GO:0055114);;	--	--	K00454|0|cam:101499921|linoleate 13S-lipoxygenase 2-1, chloroplastic-like; K00454 lipoxygenase [EC:1.13.11.12] (A)	--	--	Lipoxygenase	Linoleate 13S-lipoxygenase 2-1, chloroplastic (Precursor) GN=LOX2.1 OS=Solanum tuberosum (Potato) PE=1 SV=1	linoleate 13S-lipoxygenase 2-1, related protein [Medicago truncatula]
c128132.graph_c0	2.90198	2.65966	0.653431	0.646766	0.00297638	-2.17595	down	Molecular Function: actin binding (GO:0003779);; Cellular Component: actin filament (GO:0005884);; Biological Process: actin nucleation (GO:0045010);;	--	--	--	--	--	Formin Homology 2 Domain;; C2 domain of PTEN tumour-suppressor protein	Formin-like protein 13 GN=FH13 OS=Arabidopsis thaliana (Mouse-ear cress) PE=2 SV=3	hypothetical protein MTR_4g131020 [Medicago truncatula]
c128139.graph_c1	3.55704	2.93211	23.5399	13.8348	3.23e-06	2.41773	up	Molecular Function: protein dimerization activity (GO:0046983);;	--	--	--	--	--	Helix-loop-helix DNA-binding domain	Transcription factor bHLH66 GN=F27D4.17 OS=Arabidopsis thaliana (Mouse-ear cress) PE=2 SV=1	Transcription factor bHLH66 [Medicago truncatula]
c128219.graph_c0	1.05089	0.233029	10.1025	11.5718	5.45e-07	4.05704	up	--	--	--	--	--	--	--	--	--
c128225.graph_c0	387.33	425.756	71.3626	68.391	2.94e-09	-2.62921	down	Molecular Function: protein serine/threonine kinase activity (GO:0004674);; Molecular Function: ATP binding (GO:0005524);; Biological Process: protein phosphorylation (GO:0006468);;	[RTKL]	--	--	[T]	Signal transduction mechanisms	Protein tyrosine kinase;; Protein kinase domain;; Alphaherpesvirus glycoprotein E	Proline-rich receptor-like protein kinase PERK1 GN=PERK1 OS=Arabidopsis thaliana (Mouse-ear cress) PE=2 SV=1	PREDICTED: proline-rich receptor-like protein kinase PERK1-like [Cicer arietinum]
c128244.graph_c0	14.3226	8.47372	1.25329	2.57028	0.000120254	-2.59281	down	Molecular Function: nucleotide binding (GO:0000166);; Molecular Function: protein kinase activity (GO:0004672);; Biological Process: phosphorylation (GO:0016310);;	[RTKL]	--	K04730|0|mtr:MTR_4g073220|Kinase R-like protein; K04730 interleukin-1 receptor-associated kinase 1 [EC:2.7.11.1] (A)	--	--	Protein tyrosine kinase;; Protein kinase domain	Probable receptor-like protein kinase At1g67000 (Precursor) GN=At1g67000 OS=Arabidopsis thaliana (Mouse-ear cress) PE=2 SV=2	Kinase R-like protein [Medicago truncatula]
c128287.graph_c0	17.7832	21.1256	55.9626	52.4788	0.00214983	1.38551	up	Molecular Function: chitinase activity (GO:0004568);; Biological Process: carbohydrate metabolic process (GO:0005975);; Biological Process: chitin catabolic process (GO:0006032);;	[G]	Carbohydrate transport and metabolism	K01183|0|cam:101501606|acidic mammalian chitinase-like; K01183 chitinase [EC:3.2.1.14] (A)	[G]	Carbohydrate transport and metabolism	Glycosyl hydrolases family 18;; GPI biosynthesis protein family Pig-F	--	unknown [Medicago truncatula]
c128305.graph_c0	0.0216389	0	4.73765	1.80142	9.2e-05	8.18193	up	--	--	--	--	--	--	--	--	--
c128310.graph_c0	115.632	100.058	358.846	250.91	0.00564811	1.39999	up	Molecular Function: nucleotide binding (GO:0000166);; Molecular Function: betaine-aldehyde dehydrogenase activity (GO:0008802);; Molecular Function: aminobutyraldehyde dehydrogenase activity (GO:0019145);; Molecular Function: 1-pyrroline dehydrogenase activity (GO:0033737);; Molecular Function: metal ion binding (GO:0046872);; Biological Process: oxidation-reduction process (GO:0055114);;	[C]	Energy production and conversion	K00130|0|cam:101507930|betaine aldehyde dehydrogenase 1, chloroplastic-like; K00130 betaine-aldehyde dehydrogenase [EC:1.2.1.8] (A)	[C]	Energy production and conversion	Aldehyde dehydrogenase family	Betaine aldehyde dehydrogenase 1, chloroplastic (Precursor) OS=Arabidopsis thaliana (Mouse-ear cress) PE=2 SV=1	betaine aldehyde dehydrogenase [Medicago truncatula]
c128324.graph_c0	0	0	6.67284	2.01422	0.00734407		up	--	--	--	--	--	--	--	--	--
c128349.graph_c0	0.465434	0.588283	16.4395	7.90235	2.42e-05	4.39214	up	--	--	--	--	--	--	--	--	--
c128354.graph_c0	61.9755	38.7969	12.8392	12.1161	3.32e-05	-2.08061	down	--	[U]	Intracellular trafficking, secretion, and vesicular transport	--	[U]	Intracellular trafficking, secretion, and vesicular transport	VID27 cytoplasmic protein	Protein CYPRO4 GN=CYPRO4 OS=Cynara cardunculus (Cardoon) PE=2 SV=1	DEM2 [Medicago truncatula]
c128368.graph_c0	43.0879	51.7412	15.7171	17.2171	0.000440445	-1.60936	down	Cellular Component: mitochondrion (GO:0005739);; Biological Process: embryo development ending in seed dormancy (GO:0009793);;	--	--	--	[R]	General function prediction only	PPR repeat family;; PPR repeat;; PPR repeat;; Pentatricopeptide repeat domain;; Mitochondrial 28S ribosomal protein S27;; Region in Clathrin and VPS;; Replication factor C C-terminal domain;; Mitochondrial ATPase expression;; FKBP-type peptidyl-prolyl cis-trans isomerase	Pentatricopeptide repeat-containing protein At5g39710 GN=EMB2745 OS=Arabidopsis thaliana (Mouse-ear cress) PE=2 SV=1	PREDICTED: pentatricopeptide repeat-containing protein At5g39710-like isoform X1 [Cicer arietinum]
c128374.graph_c0	29.4885	26.3671	88.451	84.5983	0.000646314	1.55102	up	Molecular Function: serine-type endopeptidase activity (GO:0004252);; Biological Process: proteolysis (GO:0006508);; Molecular Function: identical protein binding (GO:0042802);; Biological Process: negative regulation of catalytic activity (GO:0043086);;	[O]	Posttranslational modification, protein turnover, chaperones	--	--	--	Peptidase inhibitor I9;; Subtilase family;; Subtilase family	Subtilase peptide GmSubPep (Precursor) GN=Glyma18g48580 OS=Glycine max (Soybean) PE=1 SV=3	Subtilisin-like serine protease [Medicago truncatula]
c128383.graph_c0	1.11249	0.248557	6.15752	4.17278	0.000773674	2.86971	up	Molecular Function: nucleotide binding (GO:0000166);; Molecular Function: protein kinase activity (GO:0004672);; Biological Process: phosphorylation (GO:0016310);;	[RTKL]	--	--	--	--	Protein kinase domain;; Protein tyrosine kinase;; Salt stress response/antifungal	Cysteine-rich receptor-like protein kinase 29 (Precursor) GN=CRK29 OS=Arabidopsis thaliana (Mouse-ear cress) PE=2 SV=1	cysteine-rich receptor-kinase-like protein [Medicago truncatula]
c128397.graph_c0	2.90853	1.92564	8.82065	11.8791	0.00783298	2.05192	up	Molecular Function: transferase activity, transferring phosphorus-containing groups (GO:0016772);;	[RTKL]	--	--	[T]	Signal transduction mechanisms	Protein kinase domain;; Protein tyrosine kinase;; Wall-associated receptor kinase C-terminal	Probable serine/threonine-protein kinase At1g18390 (Precursor) GN=At1g18390 OS=Arabidopsis thaliana (Mouse-ear cress) PE=2 SV=2	PREDICTED: probable serine/threonine-protein kinase At1g18390-like isoform X1 [Glycine max]
c128440.graph_c0	5.88018	6.14475	99.8309	72.3478	3.15e-18	3.7351	up	Molecular Function: saccharopine dehydrogenase (NADP+, L-glutamate-forming) activity (GO:0004755);; Molecular Function: saccharopine dehydrogenase (NADP+, L-lysine-forming) activity (GO:0047130);; Biological Process: oxidation-reduction process (GO:0055114);;	[E]	Amino acid transport and metabolism	K14157|0|mtr:MTR_4g124470|Lysine-ketoglutarate reductase/saccharopine dehydrogenase; K14157 alpha-aminoadipic semialdehyde synthase [EC:1.5.1.8 1.5.1.9] (A)	[E]	Amino acid transport and metabolism	Saccharopine dehydrogenase	Saccharopine dehydrogenase GN=F4I10.80 OS=Arabidopsis thaliana (Mouse-ear cress) PE=1 SV=1	lysine-ketoglutarate reductase/saccharopine dehydrogenase [Medicago truncatula]
c128450.graph_c0	0	0	4.48524	6.76943	1.23e-08		up	--	--	--	--	--	--	--	--	hypothetical protein MTR_7g055900 [Medicago truncatula]
c128486.graph_c0	2.89386	2.64345	0	0.0561042	4.5e-09	-6.57922	down	Biological Process: cellular process (GO:0009987);; Biological Process: macromolecule metabolic process (GO:0043170);; Biological Process: primary metabolic process (GO:0044238);; Molecular Function: organic cyclic compound binding (GO:0097159);; Molecular Function: heterocyclic compound binding (GO:1901363);;	[L]	Replication, recombination and repair	--	[R]	General function prediction only	Integrase core domain;; Aspartyl protease;; Retroviral aspartyl protease;; Reverse transcriptase (RNA-dependent DNA polymerase)	Uncharacterized mitochondrial protein AtMg00860 GN=AtMg00860 OS=Arabidopsis thaliana (Mouse-ear cress) PE=4 SV=1	Ty3/gypsy retrotransposon protein [Beta vulgaris subsp. vulgaris]
c128499.graph_c1	0.138913	0.292631	7.39341	4.26057	6.01e-06	4.60903	up	--	--	--	--	--	--	--	--	--
c128517.graph_c0	123.954	85.425	36.4042	25.0442	0.00139912	-1.85979	down	Cellular Component: photosystem II (GO:0009523);; Cellular Component: chloroplast thylakoid membrane (GO:0009535);; Biological Process: photosynthetic electron transport in photosystem II (GO:0009772);; Cellular Component: integral component of membrane (GO:0016021);; Molecular Function: chlorophyll binding (GO:0016168);; Biological Process: protein-chromophore linkage (GO:0018298);; Cellular Com…	--	--	K02705|0|pvu:PhvuCp18|psbC; photosystem II 44 kDa protein; K02705 photosystem II CP43 chlorophyll apoprotein (A)	--	--	Photosystem II protein;; Photosynthetic reaction centre protein;; Apocytochrome F, C-terminal;; CemA family;; Ycf4;; Ribosomal protein S14p/S29e;; YCF9	Photosystem II CP43 reaction center protein {ECO:0000255|HAMAP-Rule:MF_01496} (Precursor) OS=Pisum sativum (Garden pea) PE=3 SV=2	photosystem II CP43 chlorophyll apoprotein, partial (chloroplast) [Viburnum acerifolium]
c128558.graph_c0	28.1044	36.0087	3.16862	3.35572	1.28e-08	-3.38511	down	--	--	--	--	--	--	--	--	--
c128596.graph_c0	3.61746	3.33788	16.1649	8.67821	0.00836911	1.71828	up	Molecular Function: hydrolase activity, hydrolyzing O-glycosyl compounds (GO:0004553);; Biological Process: carbohydrate metabolic process (GO:0005975);;	[G]	Carbohydrate transport and metabolism	K01188|0|mtr:MTR_4g016920|Beta-glucosidase; K01188 beta-glucosidase [EC:3.2.1.21] (A)	[G]	Carbohydrate transport and metabolism	Glycosyl hydrolase family 1	Beta-glucosidase 11 (Precursor) GN=BGLU11 OS=Arabidopsis thaliana (Mouse-ear cress) PE=2 SV=2	Beta-glucosidase [Medicago truncatula]
c128608.graph_c0	8.30985	6.10105	1.95376	3.40428	0.00370157	-1.46222	down	Biological Process: cytokinesis by cell plate formation (GO:0000911);; Cellular Component: nucleus (GO:0005634);; Biological Process: regulation of DNA replication (GO:0006275);; Biological Process: double-strand break repair (GO:0006302);; Biological Process: mitotic recombination (GO:0006312);; Biological Process: RNA processing (GO:0006396);; Biological Process: proteolysis (GO:0006508);; Biol…	[DO]	--	K02365|0|cam:101501526|uncharacterized LOC101501526; K02365 separase [EC:3.4.22.49] (A)	[D]	Cell cycle control, cell division, chromosome partitioning	Peptidase family C50	Separase GN=F7H19.150 OS=Arabidopsis thaliana (Mouse-ear cress) PE=2 SV=1	PREDICTED: uncharacterized protein LOC101501526 [Cicer arietinum]
c128618.graph_c0	3.11405	1.025	12.6188	9.33783	0.000734733	2.34755	up	--	--	--	--	--	--	--	--	--
c128638.graph_c0	4.61409	1.66179	22.9733	21.2276	2.3e-08	2.76793	up	--	--	--	--	--	--	--	--	--
c128686.graph_c0	20.5194	14.7481	4.06896	1.51993	8.9e-07	-2.78669	down	--	--	--	--	--	--	--	--	hypothetical protein MTR_2g008750 [Medicago truncatula]
c128686.graph_c1	18.5707	11.1753	5.41558	1.95875	0.00119867	-2.13579	down	--	[RTKL]	--	--	--	--	Protein tyrosine kinase;; Protein kinase domain	Probable inactive receptor kinase At2g26730 (Precursor) GN=At2g26730 OS=Arabidopsis thaliana (Mouse-ear cress) PE=1 SV=1	PREDICTED: probable inactive receptor kinase At2g26730-like [Cicer arietinum]
c128691.graph_c0	11.1065	20.1024	130.139	79.2184	1.05e-07	2.60864	up	--	--	--	--	--	--	Chalcone and stilbene synthases, N-terminal domain;; Chalcone and stilbene synthases, C-terminal domain;; 3-Oxoacyl-[acyl-carrier-protein (ACP)] synthase III C terminal;; 3-Oxoacyl-[acyl-carrier-protein (ACP)] synthase III;; FAE1/Type III polyketide synthase-like protein	Chalcone synthase 6 GN=CHS6 OS=Pisum sativum (Garden pea) PE=2 SV=1	RecName: Full=Chalcone synthase 6; AltName: Full=Naregenin-chalcone synthase 6 [Pisum sativum]
c128720.graph_c0	11.0069	4.23357	40.3166	57.2361	0.0050208	2.65526	up	--	--	--	--	--	--	--	--	--
c128725.graph_c0	13.3117	6.87991	1.56687	1.02644	0.0011584	-3.04397	down	--	--	--	--	--	--	--	--	hypothetical protein MTR_0046s0100 [Medicago truncatula]
c128738.graph_c0	1.26823	1.4756	0.0356761	0.0484604	4.45e-07	-5.09599	down	--	--	--	--	[R]	General function prediction only	Reverse transcriptase (RNA-dependent DNA polymerase);; Reverse transcriptase-like	Uncharacterized mitochondrial protein AtMg00310 GN=AtMg00310 OS=Arabidopsis thaliana (Mouse-ear cress) PE=4 SV=1	PREDICTED: uncharacterized protein LOC104772500 [Camelina sativa]
c128752.graph_c0	9.49225	7.27132	0.260955	1.0634	9.19e-05	-3.65673	down	--	--	--	--	--	--	--	--	PREDICTED: GDT1-like protein 2, chloroplastic-like [Cicer arietinum]
c128799.graph_c0	0.483776	0.363968	6.52062	10.5984	0.00141773	4.29589	up	--	--	--	K02365|2.63138e-09|cit:102627230|separase-like; K02365 separase [EC:3.4.22.49] (A)	--	--	--	--	PREDICTED: separase-like isoform X1 [Citrus sinensis]
c128812.graph_c0	64.6139	47.4516	9.9886	5.83747	4.41e-12	-2.92787	down	--	[O]	Posttranslational modification, protein turnover, chaperones	K03695|0|cam:101489671|chaperone protein ClpB1-like; K03695 ATP-dependent Clp protease ATP-binding subunit ClpB (A)	[O]	Posttranslational modification, protein turnover, chaperones	AAA domain (Cdc48 subfamily);; ATPase family associated with various cellular activities (AAA);; C-terminal, D2-small domain, of ClpB protein;; AAA domain (dynein-related subfamily);; Clp amino terminal domain;; AAA ATPase domain;; AAA domain;; Sigma-54 interaction domain;; AAA domain;; AAA domain;; IstB-like ATP binding protein;; AAA domain;; Zeta toxin;; NACHT domain;; Archaeal ATPase;; Magnesi…	Chaperone protein ClpB1 GN=F1O17.2 OS=Arabidopsis thaliana (Mouse-ear cress) PE=1 SV=2	ATP-dependent chaperone ClpB [Medicago truncatula]
c128876.graph_c0	8.13972	5.58272	0.801415	0.933082	0.0011343	-3.04092	down	--	--	--	--	--	--	--	--	--
c128918.graph_c0	26.8721	17.8541	5.15617	2.21174	7.53e-09	-2.72004	down	--	--	--	--	--	--	Protein of unknown function (DUF793);; Protein of unknown function (DUF677)	--	plant/F1M20-13 protein [Medicago truncatula]
c128924.graph_c0	27.1549	22.7621	8.42136	6.8324	0.000142317	-1.7988	down	--	[Q]	Secondary metabolites biosynthesis, transport and catabolism	--	[Q]	Secondary metabolites biosynthesis, transport and catabolism	Cytochrome P450	Cytochrome P450 71D9 GN=CYP71D9 OS=Glycine max (Soybean) PE=2 SV=1	cytochrome P450 family 71 protein [Medicago truncatula]
c128940.graph_c0	0.345494	0.303253	1.8574	2.06044	0.00654229	2.52429	up	--	[IQ]	--	--	[I]	Lipid transport and metabolism	AMP-binding enzyme;; AMP-binding enzyme C-terminal domain	4-coumarate--CoA ligase-like 9 GN=4CLL9 OS=Arabidopsis thaliana (Mouse-ear cress) PE=1 SV=2	PREDICTED: 4-coumarate--CoA ligase-like 9-like [Cicer arietinum]
c128973.graph_c1	100.278	79.5532	43.1863	23.0378	0.00213493	-1.55382	down	--	--	--	--	[R]	General function prediction only	PPR repeat;; PPR repeat family;; Pentatricopeptide repeat domain;; PPR repeat;; Tetratricopeptide repeat;; Ankyrin repeats (3 copies);; Ankyrin repeat;; Ankyrin repeats (many copies);; Ankyrin repeat;; Zinc finger C-x8-C-x5-C-x3-H type (and similar)	Pentatricopeptide repeat-containing protein At4g30825, chloroplastic (Precursor) GN=At4g30825 OS=Arabidopsis thaliana (Mouse-ear cress) PE=2 SV=2	Pentatricopeptide repeat-containing protein [Medicago truncatula]
c129010.graph_c0	0.530573	0.558846	4.36418	3.37085	0.00360148	2.72692	up	--	--	--	--	--	--	--	--	--
c129024.graph_c0	35.2606	29.6531	13.0754	8.69798	0.000137259	-1.67725	down	--	[RTKL]	--	--	--	--	Protein kinase domain;; Protein tyrosine kinase;; LysM domain;; Alphaherpesvirus glycoprotein E	Protein LYK5 (Precursor) GN=LYK5 OS=Arabidopsis thaliana (Mouse-ear cress) PE=2 SV=1	LysM-domain receptor-like kinase [Medicago truncatula]
c129026.graph_c0	1.72692	1.44519	10.3015	8.05891	3.67e-05	2.44237	up	--	[Q]	Secondary metabolites biosynthesis, transport and catabolism	--	[Q]	Secondary metabolites biosynthesis, transport and catabolism	Cytochrome P450	Geraniol 8-hydroxylase GN=CYP76B6 OS=Catharanthus roseus (Madagascar periwinkle) PE=1 SV=1	cytochrome P450 family protein [Medicago truncatula]
c129040.graph_c0	1.92732	1.00854	0	0	7.3e-09		down	--	[L]	Replication, recombination and repair	--	[R]	General function prediction only	Retrotransposon gag protein;; Integrase core domain;; Chromo (CHRromatin Organisation MOdifier) domain	Uncharacterized mitochondrial protein AtMg00860 GN=AtMg00860 OS=Arabidopsis thaliana (Mouse-ear cress) PE=4 SV=1	hypothetical protein [Lotus japonicus]
c129050.graph_c0	326	364.824	93.5942	49.3944	3.24e-06	-2.3997	down	--	[O]	Posttranslational modification, protein turnover, chaperones	K04079|0|eus:EUTSA_v10024564mg|hypothetical protein; K04079 molecular chaperone HtpG (A)	[O]	Posttranslational modification, protein turnover, chaperones	Hsp90 protein;; Histidine kinase-, DNA gyrase B-, and HSP90-like ATPase;; Histidine kinase-, DNA gyrase B-, and HSP90-like ATPase	Heat shock cognate protein 80 GN=HSC80 OS=Solanum lycopersicum (Tomato) PE=2 SV=1	hypothetical protein EUTSA_v10024564mg [Eutrema salsugineum]
c129062.graph_c0	4.3465	4.22718	17.3299	15.9588	3.11e-05	1.87076	up	--	[O]	Posttranslational modification, protein turnover, chaperones	--	--	--	Subtilase family;; Peptidase inhibitor I9;; PA domain	Subtilisin-like protease (Precursor) GN=At5g67360 OS=Arabidopsis thaliana (Mouse-ear cress) PE=1 SV=1	Subtilisin-like protease [Medicago truncatula]
c129063.graph_c0	54.2882	41.7957	23.8106	7.87182	0.000720087	-1.73874	down	--	--	--	--	[R]	General function prediction only	Leucine rich repeat	Tyrosine-sulfated glycopeptide receptor 1 GN=PSYR1 OS=Arabidopsis thaliana (Mouse-ear cress) PE=2 SV=1	Receptor-like protein kinase [Medicago truncatula]
c129074.graph_c0	1.46431	0.440669	8.24901	4.03288	0.00838668	2.606	up	--	--	--	--	[R]	General function prediction only	--	--	Retrovirus-related Pol polyprotein from transposon TNT 1-94, partial [Glycine soja]
c129103.graph_c2	3.32437	3.46541	18.282	23.6132	0.00019469	2.55797	up	Molecular Function: transferase activity, transferring acyl groups other than amino-acyl groups (GO:0016747);;	--	--	--	--	--	Transferase family	Uncharacterized acetyltransferase At3g50280 GN=At3g50280 OS=Arabidopsis thaliana (Mouse-ear cress) PE=3 SV=1	N-hydroxycinnamoyl/benzoyltransferase [Medicago truncatula]
c129117.graph_c0	532.817	704.706	161.721	71.2191	5.68e-05	-2.55404	down	Molecular Function: ATP binding (GO:0005524);; Biological Process: response to stress (GO:0006950);; Molecular Function: 2-alkenal reductase [NAD(P)] activity (GO:0032440);; Biological Process: oxidation-reduction process (GO:0055114);;	[O]	Posttranslational modification, protein turnover, chaperones	K03283|0|mtr:MTR_7g024580|Heat shock protein; K03283 heat shock 70kDa protein 1/8 (A)	[O]	Posttranslational modification, protein turnover, chaperones	Hsp70 protein;; Hydantoinase/oxoprolinase;; NAD-specific glutamate dehydrogenase	Heat shock cognate 70 kDa protein 2 GN=HSC-2 OS=Solanum lycopersicum (Tomato) PE=1 SV=1	heat shock protein 70 [Medicago sativa]
c129122.graph_c0	5.99731	3.54519	0.14805	0.536274	5.16e-05	-3.79085	down	--	--	--	--	--	--	--	--	--
c129161.graph_c0	6.1532	5.44121	1.47194	1.45868	0.00310164	-2.06179	down	--	--	--	--	[R]	General function prediction only	Reverse transcriptase (RNA-dependent DNA polymerase);; Reverse transcriptase (RNA-dependent DNA polymerase);; Reverse transcriptase (RNA-dependent DNA polymerase)	Putative ribonuclease H protein At1g65750 GN=At1g65750 OS=Arabidopsis thaliana (Mouse-ear cress) PE=3 SV=1	PREDICTED: uncharacterized protein LOC102664824 [Glycine max]
c129165.graph_c0	28.4386	25.7748	13.9527	8.27252	0.00246749	-1.39801	down	--	--	--	K13457|0|cam:101492653|disease resistance protein RPM1-like; K13457 disease resistance protein RPM1 (A)	[T]	Signal transduction mechanisms	NB-ARC domain;; Leucine rich repeat;; Leucine Rich repeats (2 copies);; AAA domain;; Leucine Rich Repeat	Disease resistance protein RPM1 GN=F17A9.20 OS=Arabidopsis thaliana (Mouse-ear cress) PE=1 SV=1	PREDICTED: disease resistance protein RPM1-like [Cicer arietinum]
c129183.graph_c0	5.22498	4.89192	27.5827	18.4773	1.83e-05	2.08152	up	--	--	--	--	--	--	Ulp1 protease family, C-terminal catalytic domain;; Plant transposase (Ptta/En/Spm family)	--	hypothetical protein MTR_4g049480 [Medicago truncatula]
c129196.graph_c0	9.00165	4.50442	0.832017	1.27758	0.00689391	-2.70608	down	Molecular Function: protein tyrosine kinase activity (GO:0004713);; Molecular Function: ATP binding (GO:0005524);; Biological Process: protein phosphorylation (GO:0006468);; Cellular Component: integral component of membrane (GO:0016021);;	[RTKL]	--	--	--	--	Protein kinase domain;; Protein tyrosine kinase;; Leucine rich repeat;; Leucine Rich repeats (2 copies);; Leucine Rich Repeat;; Leucine Rich repeat;; Leucine rich repeat;; Leucine rich repeat;; Leucine Rich Repeat;; Leucine Rich repeats (2 copies);; Leucine Rich repeat;; Leucine rich repeat	Probable LRR receptor-like serine/threonine-protein kinase At4g08850 (Precursor) GN=At4g08850 OS=Arabidopsis thaliana (Mouse-ear cress) PE=2 SV=3	Receptor protein kinase-like protein [Medicago truncatula]
c129216.graph_c0	2.02606	2.55809	0.14139	0.0284527	1.3e-08	-4.93475	down	Molecular Function: DNA binding (GO:0003677);; Biological Process: DNA recombination (GO:0006310);; Molecular Function: zinc ion binding (GO:0008270);; Biological Process: DNA integration (GO:0015074);;	--	--	--	[R]	General function prediction only	Reverse transcriptase (RNA-dependent DNA polymerase);; Integrase core domain;; GAG-pre-integrase domain;; gag-polypeptide of LTR copia-type;; gag-polypeptide of LTR copia-type;; Zinc knuckle	Endonuclease OS=Nicotiana tabacum (Common tobacco) PE=2 SV=1	polyprotein [Oryza australiensis]
c129218.graph_c0	8.86584	6.9385	1.19824	2.11591	0.00468078	-2.29024	down	--	--	--	--	--	--	Transposase family tnp2;; Transposase-associated domain;; Domain of unknown function (DUF4218)	--	PREDICTED: uncharacterized protein LOC101506256 [Cicer arietinum]
c129283.graph_c0	6.64373	3.33226	0.382685	0.693089	0.003305	-3.23087	down	--	--	--	--	--	--	--	--	hypothetical protein MTR_3g012390 [Medicago truncatula]
c129310.graph_c0	0.0106345	0.0112011	0.746091	1.36291	0.000590575	6.54695	up	Molecular Function: transferase activity, transferring phosphorus-containing groups (GO:0016772);; Biological Process: macromolecule metabolic process (GO:0043170);; Biological Process: cellular metabolic process (GO:0044237);; Biological Process: primary metabolic process (GO:0044238);; Molecular Function: organic cyclic compound binding (GO:0097159);; Molecular Function: heterocyclic compound b…	--	--	--	[R]	General function prediction only	Reverse transcriptase (RNA-dependent DNA polymerase);; zinc-binding in reverse transcriptase;; Endonuclease/Exonuclease/phosphatase family	Putative ribonuclease H protein At1g65750 GN=At1g65750 OS=Arabidopsis thaliana (Mouse-ear cress) PE=3 SV=1	PREDICTED: uncharacterized protein LOC102669369 [Glycine max]
c129341.graph_c0	1.8601	0.675592	6.31037	6.25308	0.000914829	2.26479	up	--	[DO]	--	K02365|4.99367e-94|gmx:100805306|separase-like; K02365 separase [EC:3.4.22.49] (A)	[D]	Cell cycle control, cell division, chromosome partitioning	Peptidase family C50	Separase GN=F7H19.150 OS=Arabidopsis thaliana (Mouse-ear cress) PE=2 SV=1	separase-like protein [Medicago truncatula]
c129349.graph_c0	14.9579	18.7488	6.09614	2.42899	0.000148771	-2.13132	down	--	[V]	Defense mechanisms	--	[Q]	Secondary metabolites biosynthesis, transport and catabolism	ABC transporter transmembrane region;; ABC transporter	ABC transporter C family member 3 GN=MJG19.3 OS=Arabidopsis thaliana (Mouse-ear cress) PE=1 SV=1	multidrug resistance protein ABC transporter family protein [Medicago truncatula]
c129350.graph_c0	20.9136	13.0552	7.11098	7.13751	0.00688069	-1.31621	down	--	--	--	--	--	--	NB-ARC domain;; TIR domain;; TIR domain;; Leucine rich repeat;; Leucine Rich repeats (2 copies);; Leucine Rich Repeat;; Leucine rich repeat;; Leucine Rich Repeat	TMV resistance protein N GN=N OS=Nicotiana glutinosa (Tobacco) PE=1 SV=1	TMV resistance protein N [Medicago truncatula]
c129353.graph_c0	16.333	12.4055	2.38591	4.07248	6.3e-07	-2.19116	down	--	[S]	Function unknown	--	[T]	Signal transduction mechanisms	NB-ARC domain;; Leucine Rich repeats (2 copies);; Leucine rich repeat;; AAA domain;; Leucine Rich Repeat	Putative disease resistance protein RGA3 GN=RGA3 OS=Solanum bulbocastanum (Wild potato) PE=2 SV=2	disease resistance protein (CC-NBS-LRR class) family protein [Medicago truncatula]
c129354.graph_c0	9.00274	8.23179	0.0783445	0.543917	7.62e-14	-4.77622	down	--	--	--	--	[T]	Signal transduction mechanisms	NB-ARC domain;; Leucine rich repeat;; Leucine Rich repeats (2 copies)	Putative disease resistance protein RGA3 GN=RGA3 OS=Solanum bulbocastanum (Wild potato) PE=2 SV=2	NBS resistance protein [Medicago truncatula]
c129368.graph_c0	16.1967	9.02929	1.42236	1.78662	0.000105495	-3.01877	down	Biological Process: metabolic process (GO:0008152);; Molecular Function: transferase activity, transferring phosphorus-containing groups (GO:0016772);;	--	--	--	--	--	--	--	gag/pol polyprotein [Pisum sativum]
c129376.graph_c0	8.27982	4.95389	1.23786	1.14361	2.95e-05	-2.54083	down	--	--	--	--	[R]	General function prediction only	Retrotransposon gag protein;; Aspartyl protease	--	gag/pol polyprotein [Pisum sativum]
c129378.graph_c0	17.003	8.51415	0.337167	0.152663	8.72e-06	-5.80734	down	--	--	--	--	--	--	--	--	--
c129379.graph_c0	0.579632	0.97683	510.425	151.428	0.000373317	8.55727	up	Biological Process: defense response (GO:0006952);; Biological Process: response to biotic stimulus (GO:0009607);;	--	--	--	--	--	Pathogenesis-related protein Bet v I family	MLP-like protein 31 GN=MLP31 OS=Arabidopsis thaliana (Mouse-ear cress) PE=2 SV=2	MLP-like protein [Medicago truncatula]
c129380.graph_c0	0.445714	0.312977	60.6537	58.5874	5.12e-31	7.22619	up	--	--	--	--	--	--	--	--	--
c129386.graph_c0	6.63547	5.51398	0.564671	0.328721	1.21e-06	-3.8746	down	Biological Process: proteolysis (GO:0006508);; Molecular Function: cysteine-type peptidase activity (GO:0008234);;	--	--	K16292|0|mtr:MTR_5g022560|Cysteine proteinase; K16292 KDEL-tailed cysteine endopeptidase [EC:3.4.22.-] (A)	[O]	Posttranslational modification, protein turnover, chaperones	Papain family cysteine protease;; Cathepsin propeptide inhibitor domain (I29);; Peptidase C1-like family	Senescence-specific cysteine protease SAG39 {ECO:0000305} (Precursor) OS=Oryza sativa subsp. indica (Rice) PE=3 SV=1	cysteine protease 8 [Trifolium repens]
c129388.graph_c0	6.42699	6.01407	0.0333657	0.151073	3.08e-12	-6.07477	down	--	--	--	--	--	--	--	--	--
c129389.graph_c0	32.0199	28.1929	0.302592	0	2.89e-10	-7.8492	down	--	--	--	--	--	--	--	--	--
c129406.graph_c0	12.578	6.52948	0	0.984123	7.13e-05	-4.21105	down	Molecular Function: serine-type endopeptidase activity (GO:0004252);; Biological Process: proteolysis (GO:0006508);; Molecular Function: identical protein binding (GO:0042802);; Biological Process: negative regulation of catalytic activity (GO:0043086);;	--	--	--	--	--	--	Subtilase peptide GmSubPep (Precursor) GN=Glyma18g48580 OS=Glycine max (Soybean) PE=1 SV=3	Subtilisin-like protease [Medicago truncatula]
c129408.graph_c0	0.763635	0.169332	14.2445	6.64776	0.000100568	4.40802	up	--	--	--	--	--	--	--	--	--
c129414.graph_c0	141.023	178.202	0.976857	2.43266	5.07e-21	-6.58612	down	--	--	--	--	--	--	--	--	hypothetical protein MTR_2g100440 [Medicago truncatula]
c129418.graph_c0	11.8912	4.79213	0.250154	0.45306	0.00751377	-4.57828	down	Biological Process: response to hypoxia (GO:0001666);; Molecular Function: sequence-specific DNA binding transcription factor activity (GO:0003700);; Cellular Component: nucleus (GO:0005634);; Biological Process: protein folding (GO:0006457);; Biological Process: toxin catabolic process (GO:0009407);; Biological Process: heat acclimation (GO:0010286);; Biological Process: response to endoplasmic …	[K]	Transcription	K09419|3.07459e-40|mtr:MTR_3g104550|Heat stress transcription factor A-2; K09419 heat shock transcription factor, other eukaryote (A)	[K]	Transcription	HSF-type DNA-binding	Heat stress transcription factor A-2 GN=T19L18.4 OS=Arabidopsis thaliana (Mouse-ear cress) PE=1 SV=1	Heat stress transcription factor A-2 [Medicago truncatula]
c129429.graph_c0	97.5005	81.2945	15.0768	9.04815	1.79e-12	-2.99711	down	Biological Process: transcription, DNA-templated (GO:0006351);;	--	--	--	--	--	AP2 domain	Ethylene-responsive transcription factor 4 GN=ERF4 OS=Nicotiana sylvestris (Wood tobacco) PE=2 SV=1	Ethylene-responsive transcription factor [Medicago truncatula]
c129431.graph_c0	11.98	5.03187	0.0889034	0.201269	0.000293632	-5.87249	down	--	--	--	--	--	--	--	--	--
c129437.graph_c0	43.2175	38.6781	5.89341	16.6035	0.000512458	-1.88119	down	Molecular Function: ATP binding (GO:0005524);; Cellular Component: cytoplasm (GO:0005737);; Cellular Component: plasma membrane (GO:0005886);; Biological Process: ATP catabolic process (GO:0006200);; Biological Process: ATP biosynthetic process (GO:0006754);; Biological Process: cation transport (GO:0006812);; Molecular Function: hydrogen-exporting ATPase activity, phosphorylative mechanism (GO:0…	--	--	K01535|4.29968e-20|gmx:100794372|plasma membrane ATPase 4-like; K01535 H+-transporting ATPase [EC:3.6.3.6] (A)	[P]	Inorganic ion transport and metabolism	--	ATPase 8, plasma membrane-type GN=AHA8 OS=Arabidopsis thaliana (Mouse-ear cress) PE=3 SV=1	unknown [Lotus japonicus]
c129447.graph_c0	0	0.199383	21.7527	33.7983	9.23e-08	7.98843	up	--	--	--	--	--	--	Extensin-like protein repeat	--	hypothetical protein PHAVU_009G211300g, partial [Phaseolus vulgaris]
c129454.graph_c0	5.67376	6.51938	0.155979	0	1.55e-08	-6.51207	down	--	--	--	--	--	--	--	--	--
c129465.graph_c0	20.8053	21.1257	3.44003	2.13142	0.000336019	-3.02535	down	Molecular Function: ATP binding (GO:0005524);; Cellular Component: cell wall (GO:0005618);; Cellular Component: cytosol (GO:0005829);; Cellular Component: plasma membrane (GO:0005886);; Biological Process: protein folding (GO:0006457);; Cellular Component: chloroplast (GO:0009507);; Biological Process: response to high light intensity (GO:0009644);; Biological Process: heat acclimation (GO:001028…	[O]	Posttranslational modification, protein turnover, chaperones	K03283|5.92089e-81|gmx:100790356|heat shock 70 kDa protein-like; K03283 heat shock 70kDa protein 1/8 (A)	[O]	Posttranslational modification, protein turnover, chaperones	Hsp70 protein	Heat shock 70 kDa protein GN=HSP70 OS=Glycine max (Soybean) PE=1 SV=1	PREDICTED: heat shock 70 kDa protein-like [Glycine max]
c129472.graph_c0	6.03279	5.65421	0.185526	0.0560019	2.52e-08	-5.74721	down	--	--	--	--	--	--	--	--	--
c129479.graph_c0	14.9429	9.47409	0.87744	0.31783	4.57e-06	-4.47812	down	--	--	--	K00128|3.54833e-13|sly:101254485|aldehyde dehydrogenase family 2 member B7, mitochondrial; K00128 aldehyde dehydrogenase (NAD+) [EC:1.2.1.3] (A)	[C]	Energy production and conversion	--	Aldehyde dehydrogenase family 2 member B7, mitochondrial (Precursor) OS=Arabidopsis thaliana (Mouse-ear cress) PE=2 SV=2	unknown [Medicago truncatula]
c129487.graph_c0	13.9213	10.502	1.82049	2.67891	0.00952039	-2.48653	down	Molecular Function: metal ion binding (GO:0046872);;	--	--	--	[R]	General function prediction only	--	Zinc finger CCCH domain-containing protein 49 GN=At4g29190 OS=Arabidopsis thaliana (Mouse-ear cress) PE=2 SV=1	Zinc finger CCCH domain-containing protein [Medicago truncatula]
c129493.graph_c0	10.9191	7.93513	0.0576764	0	7.5e-14	-8.55755	down	--	--	--	--	--	--	--	--	--
c129502.graph_c0	0	0	9.38972	11.1881	1.8e-12		up	--	--	--	--	--	--	--	--	--
c129512.graph_c0	6.6933	3.47603	0	0	1.68e-08		down	--	--	--	--	--	--	--	--	--
c129521.graph_c0	0	0	13.6728	4.33354	0.0022461		up	--	--	--	--	--	--	--	--	--
c129522.graph_c0	9.63264	5.23317	0.0613254	1.27728	0.000218833	-3.41774	down	--	--	--	--	--	--	--	--	--
c129530.graph_c0	6.70123	4.01041	0.368452	0	1.33e-06	-5.05874	down	--	--	--	K03283|2.25059e-18|mtr:MTR_7g026090|Heat shock protein; K03283 heat shock 70kDa protein 1/8 (A)	[R]	General function prediction only	--	Uncharacterized mitochondrial protein AtMg00810 GN=AtMg00810 OS=Arabidopsis thaliana (Mouse-ear cress) PE=4 SV=1	DnaK family protein [Medicago truncatula]
c129541.graph_c0	5.37126	7.92048	0	0	4.36e-07		down	--	--	--	--	--	--	--	--	--
c129544.graph_c0	9.75276	5.55774	0	0.0974135	5.91e-12	-7.23161	down	--	--	--	--	[R]	General function prediction only	Reverse transcriptase (RNA-dependent DNA polymerase)	Putative ribonuclease H protein At1g65750 GN=At1g65750 OS=Arabidopsis thaliana (Mouse-ear cress) PE=3 SV=1	PREDICTED: uncharacterized protein LOC102665746 [Glycine max]
c129557.graph_c0	0	0	11.7891	7.73073	9.68e-09		up	--	--	--	--	--	--	--	--	--
c129563.graph_c0	0	0	12.5939	5.76935	1.43e-06		up	--	--	--	--	--	--	--	--	--
c129578.graph_c0	7.68344	6.8234	0	0.0550086	2.6e-11	-7.996	down	--	--	--	--	--	--	--	--	--
c129581.graph_c0	7.1206	5.14288	0	0	7.43e-08		down	Molecular Function: ATP binding (GO:0005524);; Biological Process: defense response (GO:0006952);; Biological Process: signal transduction (GO:0007165);; Molecular Function: nucleoside-triphosphatase activity (GO:0017111);; Molecular Function: ADP binding (GO:0043531);;	--	--	--	--	--	TIR domain;; TIR domain	TMV resistance protein N GN=N OS=Nicotiana glutinosa (Tobacco) PE=1 SV=1	disease resistance protein (TIR-NBS-LRR class), putative [Medicago truncatula]
c129585.graph_c0	9.84691	4.06988	0	0	0.000288638		down	--	--	--	--	--	--	--	--	--
c129593.graph_c0	0	0	4.71052	6.75397	4.8e-06		up	--	--	--	--	--	--	--	--	--
c129626.graph_c0	9.42248	5.2661	0	0.210637	6.93e-08	-6.05848	down	--	--	--	--	--	--	--	--	--
c129687.graph_c0	0	0	3.94251	3.57018	5.98e-08		up	--	--	--	--	--	--	--	--	--
c129690.graph_c0	3.05911	4.02765	0	0	8.26e-08		down	--	--	--	--	--	--	--	--	--
c129708.graph_c0	3.40458	2.39067	0	0.331495	1.85e-05	-4.07143	down	Molecular Function: binding (GO:0005488);; Molecular Function: oxidoreductase activity (GO:0016491);; Molecular Function: hydrolase activity (GO:0016787);; Biological Process: organic substance metabolic process (GO:0071704);;	--	--	--	[R]	General function prediction only	Reverse transcriptase-like;; zinc-binding in reverse transcriptase	--	PREDICTED: putative ribonuclease H protein At1g65750-like [Fragaria vesca subsp. vesca]
c129748.graph_c0	0.0836495	0	2.73197	3.11536	4.79e-07	6.13776	up	--	--	--	--	--	--	--	--	--
c129763.graph_c0	0	0.101271	4.30318	2.31701	4.69e-07	5.82964	up	--	--	--	--	--	--	--	--	--
c129794.graph_c0	0	0	3.06137	1.26331	4.57e-05		up	--	--	--	--	--	--	--	--	--
c129857.graph_c0	0	0	2.19889	2.33258	2.77e-08		up	--	--	--	--	--	--	--	--	--
c129999.graph_c0	0	0	1.79526	1.4225	4.5e-08		up	Cellular Component: cell part (GO:0044464);; Biological Process: single-organism process (GO:0044699);;	[TZDR]	--	K02183|3.76869e-29|mtr:MTR_7g087610|Calmodulin; K02183 calmodulin (A)	[T]	Signal transduction mechanisms	EF hand;; EF-hand domain pair;; EF-hand domain pair;; EF-hand domain;; EF hand;; EF-hand domain;; Cytoskeletal-regulatory complex EF hand	Calmodulin OS=Chlamydomonas reinhardtii (Chlamydomonas smithii) PE=1 SV=2	hypothetical protein EMIHUDRAFT_373343 [Emiliania huxleyi CCMP1516]
c130582.graph_c0	0	0	1.20976	1.09551	6.11e-08		up	--	--	--	--	[R]	General function prediction only	7 transmembrane receptor (rhodopsin family)	--	--
c131697.graph_c0	0	0	1.21349	1.14116	5.51e-08		up	Molecular Function: catalytic activity (GO:0003824);;	--	--	--	[R]	General function prediction only	Reverse transcriptase (RNA-dependent DNA polymerase)	--	RNA-directed DNA polymerase (Reverse transcriptase); Ribonuclease H; Endonuclease/exonuclease/phosphatase [Medicago truncatula]
c43155.graph_c0	0	0	3.13897	4.17496	4.94e-08		up	--	--	--	--	--	--	Arthropod defensin	--	--
c43201.graph_c0	0.0932688	0	2.19998	1.58356	1.66e-06	5.32294	up	--	--	--	--	--	--	--	--	--
c46237.graph_c0	5.69362	4.60485	0	0	1.98e-08		down	--	--	--	--	--	--	--	--	--
c46281.graph_c0	0.577161	0.202639	5.11973	5.68992	8.6e-05	3.75759	up	Biological Process: polysaccharide biosynthetic process (GO:0000271);; Biological Process: polysaccharide catabolic process (GO:0000272);; Biological Process: starch metabolic process (GO:0005982);; Biological Process: glycolysis (GO:0006096);; Biological Process: calcium ion transport (GO:0006816);; Biological Process: water transport (GO:0006833);; Biological Process: hyperosmotic response (GO:…	--	--	--	--	--	COBRA-like protein	Protein COBRA (Precursor) GN=COB OS=Arabidopsis thaliana (Mouse-ear cress) PE=2 SV=1	COBRA-like protein 2 precursor [Medicago truncatula]
c46347.graph_c0	0	0	11.0956	6.93435	3.87e-09		up	Molecular Function: iron ion binding (GO:0005506);; Molecular Function: electron carrier activity (GO:0009055);; Molecular Function: oxidoreductase activity, acting on paired donors, with incorporation or reduction of molecular oxygen (GO:0016705);; Molecular Function: heme binding (GO:0020037);; Biological Process: oxidation-reduction process (GO:0055114);;	--	--	--	[Q]	Secondary metabolites biosynthesis, transport and catabolism	Cytochrome P450	Cytochrome P450 71A21 GN=CYP71A21 OS=Arabidopsis thaliana (Mouse-ear cress) PE=2 SV=1	Cytochrome P450, partial [Medicago truncatula]
c46429.graph_c0	4.05318	7.41312	0.0760124	0.516254	0.00315689	-4.28758	down	Cellular Component: extracellular region (GO:0005576);; Biological Process: proteolysis (GO:0006508);; Molecular Function: cysteine-type peptidase activity (GO:0008234);;	--	--	K01373|0|cam:101500737|cysteine proteinase 15A-like; K01373 cathepsin F [EC:3.4.22.41] (A)	[O]	Posttranslational modification, protein turnover, chaperones	Papain family cysteine protease;; Cathepsin propeptide inhibitor domain (I29)	Probable cysteine proteinase A494 (Precursor) GN=At2g21430 OS=Arabidopsis thaliana (Mouse-ear cress) PE=2 SV=2	cysteine proteinase precursor [Vicia sativa]
c46889.graph_c0	3.88957	6.43789	0	0	4.51e-05		down	--	--	--	--	--	--	Domain of unknown function (DUF4535)	--	hypothetical protein ARALYDRAFT_492310 [Arabidopsis lyrata subsp. lyrata]
c47067.graph_c0	14.5502	10.1507	1.14287	2.69083	0.00411022	-2.70381	down	--	--	--	K00799|5.23349e-07|mtr:MTR_7g065270|hypothetical protein; K00799 glutathione S-transferase [EC:2.5.1.18] (A)	--	--	--	--	glutathione S-transferase, amino-terminal domain protein [Medicago truncatula]
c47336.graph_c0	0	0	5.87457	7.69468	1.82e-09		up	--	--	--	--	--	--	--	--	--
c47432.graph_c0	0	0	10.4153	3.1439	0.00596195		up	--	--	--	--	--	--	--	--	--
c47753.graph_c0	1.64393	2.43496	0	0.39391	0.00157139	-3.34598	down	--	--	--	--	--	--	Phloem protein 2;; F-box domain;; F-box-like	Putative F-box protein PP2-B12 GN=PP2B12 OS=Arabidopsis thaliana (Mouse-ear cress) PE=3 SV=1	F-box protein PP2-B1 [Medicago truncatula]
c47855.graph_c0	0.0649677	0.0684297	40.629	10.0342	0.00732779	8.40442	up	--	--	--	--	--	--	--	--	--
c48473.graph_c0	39.4255	18.3205	0	0.211697	2.07e-06	-8.0194	down	--	--	--	--	--	--	--	--	--
c48526.graph_c0	31.3864	24.8379	0	0	1.75e-13		down	--	--	--	--	--	--	--	--	--
c48583.graph_c0	18.8575	30.6413	1.32133	1.00762	8.47e-05	-4.52859	down	Cellular Component: cell wall (GO:0005618);; Cellular Component: nucleolus (GO:0005730);; Cellular Component: vacuolar membrane (GO:0005774);; Biological Process: protein ubiquitination involved in ubiquitin-dependent protein catabolic process (GO:0042787);;	--	--	K08770|2.87578e-98|cam:101499579|polyubiquitin 4-like; K08770 ubiquitin C (A)	[OR]	--	Ubiquitin family;; Ubiquitin-2 like Rad60 SUMO-like;; Ubiquitin-like domain;; Telomere stability and silencing;; Ubiquitin-2 like Rad60 SUMO-like;; DUF2407 ubiquitin-like domain	Ubiquitin (Precursor; Fragment) OS=Hordeum vulgare (Barley) PE=2 SV=1	Ubiquitin-like protein [Medicago truncatula]
c48842.graph_c0	0	0.0707008	2.51703	2.86753	3.32e-07	6.09784	up	--	--	--	--	[O]	Posttranslational modification, protein turnover, chaperones	--	--	PREDICTED: pollen-specific leucine-rich repeat extensin-like protein 3-like [Cicer arietinum]
c49191.graph_c0	82.3035	56.9541	19.5259	11.9729	5.73e-07	-2.24292	down	Biological Process: response to hypoxia (GO:0001666);; Molecular Function: DNA binding (GO:0003677);; Cellular Component: nucleus (GO:0005634);; Biological Process: regulation of transcription, DNA-templated (GO:0006355);; Biological Process: regulation of cell size (GO:0008361);; Biological Process: response to light stimulus (GO:0009416);; Biological Process: response to wounding (GO:0009611);;…	--	--	--	--	--	--	NAC domain-containing protein 2 GN=T1N6.12 OS=Arabidopsis thaliana (Mouse-ear cress) PE=2 SV=2	NAC-domain protein [Medicago truncatula]
c49401.graph_c0	16.1706	11.6169	0.100309	2.18006	7.13e-06	-3.56213	down	--	--	--	--	--	--	--	--	--
c49736.graph_c0	3.82656	2.27359	0	0.161213	9.8e-07	-5.17884	down	--	--	--	--	--	--	--	--	--
c50449.graph_c0	17.8323	11.0005	0.110334	0.49957	9.23e-14	-5.54516	down	--	[O]	Posttranslational modification, protein turnover, chaperones	K00799|3.25175e-132|mtr:MTR_1g090150|hypothetical protein; K00799 glutathione S-transferase [EC:2.5.1.18] (A)	[O]	Posttranslational modification, protein turnover, chaperones	Glutathione S-transferase, C-terminal domain;; Glutathione S-transferase, C-terminal domain;; Glutathione S-transferase, N-terminal domain;; Glutathione S-transferase, N-terminal domain;; Glutathione S-transferase, N-terminal domain	Probable glutathione S-transferase GN=HSP26-A OS=Glycine max (Soybean) PE=2 SV=1	hypothetical protein MTR_1g090150 [Medicago truncatula]
c50582.graph_c0	12.2081	7.10885	0.200097	1.6308	1.06e-05	-3.36173	down	--	[DZ]	--	--	[S]	Function unknown	Regulator of chromosome condensation (RCC1) repeat;; Regulator of chromosome condensation (RCC1) repeat	Ultraviolet-B receptor UVR8 GN=UVR8 OS=Arabidopsis thaliana (Mouse-ear cress) PE=1 SV=1	E3 ubiquitin-protein ligase HERC2-like protein [Medicago truncatula]
c50694.graph_c0	0	0	29.3444	10.0707	5.26e-05		up	--	--	--	--	--	--	--	--	--
c51477.graph_c0	0	0	6.59023	4.27696	8.48e-09		up	--	--	--	--	--	--	--	--	--
c51750.graph_c0	3.61219	3.08227	0	0.0751279	4.03e-10	-6.42898	down	--	--	--	--	--	--	Domain of unknown function (DUF4283)	--	PREDICTED: uncharacterized protein LOC102663792 [Glycine max]
c52556.graph_c0	56.9812	35.4082	2.27467	3.38606	5.98e-11	-4.06632	down	Cellular Component: ubiquitin ligase complex (GO:0000151);; Molecular Function: ubiquitin-protein ligase activity (GO:0004842);; Biological Process: protein ubiquitination (GO:0016567);;	--	--	--	--	--	U-box domain;; Zinc-finger of the MIZ type in Nse subunit	U-box domain-containing protein 20 GN=PUB20 OS=Arabidopsis thaliana (Mouse-ear cress) PE=2 SV=1	U-box domain-containing protein [Medicago truncatula]
c53273.graph_c0	0	0.084666	1.5071	1.18867	3.17e-06	4.81586	up	Molecular Function: glyceraldehyde-3-phosphate dehydrogenase (NAD+) (phosphorylating) activity (GO:0004365);; Cellular Component: cytoplasm (GO:0005737);; Biological Process: glycolysis (GO:0006096);; Molecular Function: NADP binding (GO:0050661);; Molecular Function: NAD binding (GO:0051287);; Biological Process: oxidation-reduction process (GO:0055114);;	[G]	Carbohydrate transport and metabolism	K00134|1.87393e-158|bdi:100838646|glyceraldehyde-3-phosphate dehydrogenase GAPCP2, chloroplastic-like; K00134 glyceraldehyde 3-phosphate dehydrogenase [EC:1.2.1.12] (A)	[G]	Carbohydrate transport and metabolism	Glyceraldehyde 3-phosphate dehydrogenase, C-terminal domain;; Glyceraldehyde 3-phosphate dehydrogenase, NAD binding domain	Glyceraldehyde-3-phosphate dehydrogenase GAPCP1, chloroplastic (Precursor) GN=GAPCP1 OS=Arabidopsis thaliana (Mouse-ear cress) PE=1 SV=1	glyceraldehyde-3-phosphate dehydrogenase [Mortierella verticillata NRRL 6337]
c55028.graph_c0	14.3578	8.14609	2.9095	2.39152	0.00180532	-2.1579	down	Molecular Function: structural constituent of ribosome (GO:0003735);; Cellular Component: mitochondrion (GO:0005739);; Biological Process: translation (GO:0006412);; Cellular Component: chloroplast (GO:0009507);; Cellular Component: small ribosomal subunit (GO:0015935);; Molecular Function: rRNA binding (GO:0019843);;	[J]	Translation, ribosomal structure and biogenesis	K02986|8.25673e-123|mtr:MetrCp068|rps4; ribosomal protein S4; K02986 small subunit ribosomal protein S4 (A)	[J]	Translation, ribosomal structure and biogenesis	Ribosomal protein S4/S9 N-terminal domain;; S4 domain	30S ribosomal protein S4, chloroplastic GN=rps4 OS=Glycine max (Soybean) PE=3 SV=1	ribosomal protein S4 [Lens culinaris]
c55896.graph_c0	80.4798	38.0773	0.319967	0.627791	1.25e-07	-6.97792	down	--	--	--	--	--	--	--	--	PREDICTED: uncharacterized protein LOC102662784 [Glycine max]
c58288.graph_c0	41.3588	27.9544	2.15931	1.74336	4.19e-19	-4.23066	down	Molecular Function: ATP binding (GO:0005524);; Molecular Function: nucleoside-triphosphatase activity (GO:0017111);; Biological Process: cell division (GO:0051301);;	[O]	Posttranslational modification, protein turnover, chaperones	--	[O]	Posttranslational modification, protein turnover, chaperones	Domain associated at C-terminal with AAA;; ATPase family associated with various cellular activities (AAA)	26S protease regulatory subunit 6B homolog GN=MCK7.16 OS=Arabidopsis thaliana (Mouse-ear cress) PE=1 SV=1	PREDICTED: uncharacterized protein LOC101511087 [Cicer arietinum]
c58775.graph_c0	0	0	2.53924	3.09235	3.83e-08		up	--	--	--	--	--	--	--	--	--
c59763.graph_c0	5.44617	7.40178	0	1.73196	0.00242344	-2.86143	down	Biological Process: metabolic process (GO:0008152);; Molecular Function: hydrolase activity (GO:0016787);;	[R]	General function prediction only	--	[I]	Lipid transport and metabolism	--	--	epoxide hydrolase [Medicago truncatula]
c59982.graph_c0	0	0	3.65335	2.48125	4.09e-09		up	--	--	--	--	--	--	--	--	--
c60067.graph_c0	11.9984	10.2567	0.0701133	0	1.38e-13	-8.52167	down	--	--	--	--	--	--	--	--	--
c61402.graph_c0	0	0.0645771	14.684	13.3645	5.37e-15	8.59505	up	--	--	--	--	--	--	--	--	--
c62081.graph_c0	0.0733871	0.231893	15.2685	18.891	2.76e-13	6.69581	up	--	--	--	--	--	--	--	--	--
c62295.graph_c0	0.0351081	0	0.976751	1.53827	0.000316719	6.19328	up	--	--	--	--	--	--	--	--	--
c65571.graph_c0	1.79659	0.841033	27.527	21.6475	5.47e-06	4.15285	up	--	[O]	Posttranslational modification, protein turnover, chaperones	K08770|5.65973e-10|gmx:547906|SUBI-1; ubiquitin; K08770 ubiquitin C (A)	[OR]	--	--	Ubiquitin (Precursor) OS=Lupinus polyphyllus (Large-leaved lupin) PE=3 SV=2	Unknown protein [Arabidopsis thaliana]
c66015.graph_c0	0	0	1.38646	1.41247	3.74e-08		up	--	--	--	--	--	--	--	--	--
c66313.graph_c0	8.41448	12.5303	0.350976	1.11241	0.000109444	-3.87135	down	--	--	--	--	--	--	--	--	hypothetical protein MTR_5g080040 [Medicago truncatula]
c66468.graph_c0	153.188	84.4409	21.408	9.50053	0.000155032	-3.05169	down	--	--	--	--	[ZD]	--	EF-hand domain pair	Calcium-binding protein PBP1 GN=F24B18.11 OS=Arabidopsis thaliana (Mouse-ear cress) PE=1 SV=1	Centrin-2 [Medicago truncatula]
c67147.graph_c0	19.3592	17.4671	0	0.0779623	9.03e-17	-8.83753	down	--	--	--	--	--	--	--	--	--
c68909.graph_c0	0	0	2.31367	3.36723	3.81e-06		up	--	--	--	--	--	--	--	--	--
c69340.graph_c0	4.32736	5.37839	0.104689	0.75842	0.000270526	-3.48717	down	--	--	--	--	--	--	--	--	hypothetical protein MTR_2g034340 [Medicago truncatula]
c69559.graph_c0	43.8893	50.4953	0.816759	13.6831	0.00120583	-2.67967	down	--	--	--	--	--	--	--	--	--
c69602.graph_c0	0	0	1.18135	1.89643	0.000127272		up	Molecular Function: cytochrome-c oxidase activity (GO:0004129);; Molecular Function: iron ion binding (GO:0005506);; Cellular Component: mitochondrial inner membrane (GO:0005743);; Biological Process: oxidative phosphorylation (GO:0006119);; Molecular Function: electron carrier activity (GO:0009055);; Biological Process: aerobic respiration (GO:0009060);; Cellular Component: integral component of…	[C]	Energy production and conversion	K02256|3.8091e-94|cvr:OJ20_p01|cox1; cytochrome c oxidase subunit 1; K02256 cytochrome c oxidase subunit 1 [EC:1.9.3.1] (A)	[C]	Energy production and conversion	--	Cytochrome c oxidase subunit 1 GN=COX1 OS=Phytophthora megasperma (Potato pink rot fungus) PE=3 SV=1	cytochrome oxidase subunit I [Vaucheria sessilis]
c69758.graph_c0	0	0	0.992396	1.16495	4.53e-08		up	Molecular Function: oxoglutarate dehydrogenase (succinyl-transferring) activity (GO:0004591);; Cellular Component: mitochondrion (GO:0005739);; Molecular Function: zinc ion binding (GO:0008270);; Molecular Function: hydrolase activity, acting on glycosyl bonds (GO:0016798);; Biological Process: primary metabolic process (GO:0044238);; Biological Process: response to cadmium ion (GO:0046686);; Mol…	[C]	Energy production and conversion	K00164|0|smo:SELMODRAFT_152569|hypothetical protein; K00164 2-oxoglutarate dehydrogenase E1 component [EC:1.2.4.2] (A)	[G]	Carbohydrate transport and metabolism	Dehydrogenase E1 component;; Transketolase, pyrimidine binding domain	--	hypothetical protein SELMODRAFT_152569 [Selaginella moellendorffii]
c72494.graph_c0	17.8366	7.72801	0	0.692834	0.000949635	-5.13082	down	Molecular Function: transferase activity, transferring acyl groups other than amino-acyl groups (GO:0016747);;	--	--	--	--	--	Transferase family	Phenolic glucoside malonyltransferase 2 GN=PMAT2 OS=Arabidopsis thaliana (Mouse-ear cress) PE=1 SV=1	Isoflavonoid malonyl transferase [Medicago truncatula]
c73065.graph_c0	0.0416496	0	1.20912	2.00738	0.000720087	6.30486	up	--	--	--	--	--	--	Lipase	--	--
c73451.graph_c0	0	0.15439	4.43263	6.42242	2.92e-05	5.99767	up	--	--	--	--	--	--	--	--	--
c75913.graph_c0	10.3576	6.80071	0.650841	0.736721	0.000114341	-3.68532	down	--	--	--	K13993|9.73037e-40|mtr:MTR_5g078040|15.7 kDa heat shock protein, peroxisomal; K13993 HSP20 family protein (A)	[O]	Posttranslational modification, protein turnover, chaperones	Hsp20/alpha crystallin family	16.0 kDa heat shock protein, peroxisomal OS=Oryza sativa subsp. japonica (Rice) PE=2 SV=1	heat shock protein 15.9 [Medicago sativa]
c76782.graph_c0	0	0	3.10952	3.21107	3.68e-09		up	--	--	--	--	[L]	Replication, recombination and repair	Domain of unknown function (DUF4413);; hAT family C-terminal dimerisation region	Zinc finger BED domain-containing protein RICESLEEPER 2 OS=Oryza sativa subsp. japonica (Rice) PE=2 SV=1	putative transposase [Medicago truncatula]
c76827.graph_c0	0	0	1.36487	1.82709	4.67e-07		up	--	--	--	--	--	--	--	--	--
c77193.graph_c0	7.17107	5.96796	0	0.969763	7.65e-05	-3.71057	down	--	--	--	--	--	--	--	--	--
c77226.graph_c0	0	0	3.14924	2.67076	3.65e-09		up	--	--	--	--	--	--	--	--	--
c77260.graph_c0	0.826248	0.639387	0.0203968	0.0184706	1.59e-06	-5.31488	down	Biological Process: intracellular protein transport (GO:0006886);; Cellular Component: chloroplast outer membrane (GO:0009707);; Molecular Function: P-P-bond-hydrolysis-driven protein transmembrane transporter activity (GO:0015450);; Cellular Component: integral component of membrane (GO:0016021);;	[M]	Cell wall/membrane/envelope biogenesis	--	--	--	Surface antigen;; Surface antigen variable number repeat	Protein TOC75, chloroplastic (Precursor) GN=TOC75 OS=Pisum sativum (Garden pea) PE=1 SV=1	PREDICTED: protein TOC75, chloroplastic-like [Cicer arietinum]
c77303.graph_c0	0	0	1.64631	3.24094	0.00228228		up	Cellular Component: extracellular region (GO:0005576);;	[S]	Function unknown	K13449|6.94476e-102|cam:101503659|pathogenesis-related protein 1-like; K13449 pathogenesis-related protein 1 (A)	[S]	Function unknown	Cysteine-rich secretory protein family	Pathogenesis-related protein 1B (Precursor) OS=Nicotiana tabacum (Common tobacco) PE=2 SV=1	unknown [Medicago truncatula]
c77436.graph_c0	1.04288	1.01808	0	0.222898	0.000771743	-3.16586	down	--	--	--	--	--	--	--	--	--
c78488.graph_c0	0	0	1.06837	1.40284	4.42e-07		up	--	--	--	--	[R]	General function prediction only	--	Putative ribonuclease H protein At1g65750 GN=At1g65750 OS=Arabidopsis thaliana (Mouse-ear cress) PE=3 SV=1	PREDICTED: uncharacterized protein LOC103430323 [Malus domestica]
c79454.graph_c0	0.0743982	0	1.4399	0.896441	3.5e-06	4.94439	up	--	--	--	--	--	--	--	--	hypothetical protein MTR_5g063260 [Medicago truncatula]
c79540.graph_c0	0.211395	0.0742198	7.67122	4.93992	2.63e-07	5.39384	up	Molecular Function: nucleotide binding (GO:0000166);; Molecular Function: kinase activity (GO:0016301);; Biological Process: phosphorylation (GO:0016310);;	--	--	--	[T]	Signal transduction mechanisms	Protein kinase domain	Mitogen-activated protein kinase kinase kinase YODA GN=YDA OS=Arabidopsis thaliana (Mouse-ear cress) PE=1 SV=1	Mitogen-activated protein kinase kinase kinase [Medicago truncatula]
c79543.graph_c0	0	0	4.94193	3.23211	4.19e-08		up	Molecular Function: monooxygenase activity (GO:0004497);; Molecular Function: iron ion binding (GO:0005506);; Molecular Function: electron carrier activity (GO:0009055);; Molecular Function: oxidoreductase activity, acting on paired donors, with incorporation or reduction of molecular oxygen (GO:0016705);; Molecular Function: heme binding (GO:0020037);; Biological Process: oxidation-reduction pro…	--	--	--	[Q]	Secondary metabolites biosynthesis, transport and catabolism	Cytochrome P450	Cytochrome P450 89A9 GN=CYP89A9 OS=Arabidopsis thaliana (Mouse-ear cress) PE=2 SV=1	unknown [Medicago truncatula]
c79588.graph_c0	0.407663	0.429386	2.71214	3.46074	0.00236583	2.814	up	Molecular Function: serine-type endopeptidase activity (GO:0004252);; Biological Process: proteolysis (GO:0006508);; Cellular Component: integral component of membrane (GO:0016021);;	--	--	--	--	--	--	--	PREDICTED: uncharacterized protein LOC101508271 [Cicer arietinum]
c79592.graph_c0	2.84434	2.62142	0.215036	0.454365	0.00128431	-3.06262	down	--	--	--	--	--	--	--	--	transmembrane protein, putative [Medicago truncatula]
c79604.graph_c0	0.543473	0.228973	3.68141	4.64343	0.000419765	3.39639	up	--	--	--	--	--	--	--	--	--
c79619.graph_c0	0	0	9.75961	3.20731	0.000915		up	--	--	--	--	--	--	--	--	late embryogenesis abundant D-like protein [Medicago truncatula]
c79622.graph_c0	1.30059	2.11192	0.0655508	0	0.000247827	-5.93921	down	--	--	--	--	--	--	--	--	hypothetical protein MTR_8g104290 [Medicago truncatula]
c79671.graph_c0	0	0	5.89129	2.57332	7.2e-06		up	--	--	--	--	--	--	--	--	--
c79680.graph_c0	0	0	3.79576	8.59324	0.00188531		up	--	[O]	Posttranslational modification, protein turnover, chaperones	--	[O]	Posttranslational modification, protein turnover, chaperones	DnaJ domain	Chaperone protein dnaJ 20, chloroplastic (Precursor) GN=F18A5.220 OS=Arabidopsis thaliana (Mouse-ear cress) PE=1 SV=2	PREDICTED: chaperone protein dnaJ 20, chloroplastic-like [Glycine max]
c79750.graph_c0	9.27549	4.48611	0	0	2.27e-06		down	--	--	--	--	--	--	--	--	--
c79760.graph_c0	6.28932	7.22669	0.230536	0.556705	7.13e-06	-4.13674	down	Biological Process: signal transduction (GO:0007165);; Biological Process: primary metabolic process (GO:0044238);; Biological Process: cellular macromolecule metabolic process (GO:0044260);;	--	--	K17925|2.98065e-16|pvu:PHAVU_003G296000g|hypothetical protein; K17925 sorting nexin-13 (A)	[ZUD]	--	--	--	hypothetical protein PHAVU_003G296000g [Phaseolus vulgaris]
c79780.graph_c0	0.481446	0.570488	38.2178	15.03	0.000424044	5.51507	up	--	--	--	--	--	--	--	--	--
c79784.graph_c0	22.302	16.4269	0.660275	1.02501	1.51e-09	-4.56421	down	Molecular Function: nucleotide binding (GO:0000166);; Biological Process: mRNA splicing, via spliceosome (GO:0000398);; Biological Process: rRNA processing (GO:0006364);; Biological Process: protein import into nucleus (GO:0006606);; Biological Process: pyrimidine ribonucleotide biosynthetic process (GO:0009220);; Cellular Component: small-subunit processome (GO:0032040);; Cellular Component: Cul…	--	--	K14554|2.27511e-10|cam:101513454|uncharacterized LOC101513454; K14554 U3 small nucleolar RNA-associated protein 21 (A)	--	--	--	--	transducin/WD40 repeat protein [Medicago truncatula]
c79786.graph_c0	42.676	30.3182	14.0029	8.49938	0.000454027	-1.79793	down	--	--	--	--	--	--	Anaphase-promoting complex subunit 15	--	PREDICTED: anaphase-promoting complex subunit 15-like isoform X1 [Cicer arietinum]
c79788.graph_c0	200.267	163.671	27.0587	18.0497	2.45e-13	-3.11218	down	Biological Process: response to stress (GO:0006950);; Biological Process: response to abiotic stimulus (GO:0009628);; Molecular Function: metal ion binding (GO:0046872);;	--	--	--	[R]	General function prediction only	C2H2-type zinc finger	Zinc finger protein ZAT10 GN=T22C5.18 OS=Arabidopsis thaliana (Mouse-ear cress) PE=2 SV=1	kruppel-like zinc finger protein [Trifolium repens]
c79792.graph_c0	170.818	131.288	17.4696	11.6851	1.04e-15	-3.47054	down	Molecular Function: zinc ion binding (GO:0008270);;	--	--	K11982|4.91016e-149|cam:101502790|E3 ubiquitin-protein ligase RING1-like; K11982 E3 ubiquitin-protein ligase RNF115/126 [EC:6.3.2.19] (A)	[O]	Posttranslational modification, protein turnover, chaperones	Protein of unknown function (DUF1117);; Ring finger domain;; zinc-finger;; RING-H2 zinc finger;; Zinc finger, C3HC4 type (RING finger);; Zinc finger, C3HC4 type (RING finger)	E3 ubiquitin-protein ligase RING1 GN=RING1 OS=Gossypium hirsutum (Upland cotton) PE=1 SV=1	PREDICTED: E3 ubiquitin-protein ligase RING1-like [Cicer arietinum]
c79853.graph_c0	61.435	68.7494	0.134503	0.0609004	5.29e-45	-9.51619	down	--	--	--	--	[R]	General function prediction only	Aspartyl protease	--	PREDICTED: uncharacterized protein LOC101490372 [Cicer arietinum]
c79857.graph_c0	2182.36	2334.97	77.3763	107.831	9.04e-23	-4.67194	down	--	--	--	--	--	--	--	--	hypothetical protein MTR_5g086360 [Medicago truncatula]
c79866.graph_c0	38.7632	40.5311	14.0723	17.3351	0.00404101	-1.40661	down	Molecular Function: ATP binding (GO:0005524);; Biological Process: ATP catabolic process (GO:0006200);; Biological Process: ATP biosynthetic process (GO:0006754);; Biological Process: cation transport (GO:0006812);; Molecular Function: hydrogen-exporting ATPase activity, phosphorylative mechanism (GO:0008553);; Cellular Component: integral component of membrane (GO:0016021);; Molecular Function: …	--	--	K01535|0|mtr:MTR_2g036650|Plasma membrane ATPase; K01535 H+-transporting ATPase [EC:3.6.3.6] (A)	[P]	Inorganic ion transport and metabolism	--	Plasma membrane ATPase 4 GN=PMA4 OS=Nicotiana plumbaginifolia (Leadwort-leaved tobacco) PE=2 SV=1	plasma membrane H(+)-ATPase precursor [Vicia faba]
c79876.graph_c0	0.426124	0.224416	48.0103	87.2192	7.27e-06	7.68013	up	Molecular Function: iron ion binding (GO:0005506);; Cellular Component: cytoplasm (GO:0005737);; Molecular Function: linoleate 13S-lipoxygenase activity (GO:0016165);; Biological Process: oxylipin biosynthetic process (GO:0031408);; Biological Process: oxidation-reduction process (GO:0055114);;	--	--	K15718|0|mtr:MTR_8g018730|Seed lipoxygenase; K15718 linoleate 9S-lipoxygenase [EC:1.13.11.58] (A)	--	--	Lipoxygenase;; PLAT/LH2 domain	Seed linoleate 9S-lipoxygenase GN=LOX1.4 OS=Glycine max (Soybean) PE=1 SV=1	lipoxygenase [Pisum sativum]
c79902.graph_c0	16.5349	11.6692	6.14638	1.77927	0.00154159	-1.97244	down	Molecular Function: hydrolase activity (GO:0016787);;	[R]	General function prediction only	--	--	--	Alpha/beta hydrolase family;; alpha/beta hydrolase fold;; Alpha/beta hydrolase family	Probable strigolactone esterase D14 homolog GN=D14 OS=Arabidopsis thaliana (Mouse-ear cress) PE=1 SV=1	Sigma factor sigB regulation protein rsbQ [Medicago truncatula]
c79962.graph_c0	3.34462	5.36433	0	0.499588	0.000782691	-4.1005	down	--	--	--	--	--	--	--	--	--
c79967.graph_c0	4.11361	3.88739	0.37203	0.505344	0.000293239	-3.24912	down	Molecular Function: iron ion binding (GO:0005506);; Molecular Function: oxidoreductase activity, acting on paired donors, with incorporation or reduction of molecular oxygen, 2-oxoglutarate as one donor, and incorporation of one atom each of oxygen into both donors (GO:0016706);; Biological Process: oxidation-reduction process (GO:0055114);;	[R]	General function prediction only	--	[QR]	--	2OG-Fe(II) oxygenase superfamily;; non-haem dioxygenase in morphine synthesis N-terminal	Gibberellin 2-beta-dioxygenase 8 GN=GA2OX8 OS=Arabidopsis thaliana (Mouse-ear cress) PE=1 SV=2	2OG-Fe(II) oxygenase family oxidoreductase [Medicago truncatula]
c80002.graph_c0	29.494	17.5553	9.38366	2.7764	0.00419683	-2.0854	down	--	--	--	--	--	--	--	--	PREDICTED: uncharacterized protein LOC101507345 [Cicer arietinum]
c80003.graph_c0	6.72949	4.47669	0.285618	0.51729	7.93e-05	-3.83156	down	Molecular Function: ATP binding (GO:0005524);; Biological Process: defense response (GO:0006952);; Biological Process: signal transduction (GO:0007165);; Molecular Function: nucleoside-triphosphatase activity (GO:0017111);; Molecular Function: ADP binding (GO:0043531);;	--	--	--	--	--	Peptidase of plants and bacteria	Basic secretory protease {ECO:0000303|PubMed:22773449} (Fragments) OS=Boswellia serrata (Indian frankincense) PE=1 SV=1	PREDICTED: uncharacterized protein LOC101506848 [Cicer arietinum]
c80021.graph_c0	4.63073	3.04843	0.700178	0.697459	0.00832236	-2.52336	down	--	--	--	--	--	--	--	--	hypothetical protein MTR_4g097420 [Medicago truncatula]
c80022.graph_c0	7.78994	6.32192	1.44175	0.559539	0.000238781	-2.94974	down	--	--	--	--	--	--	Arabidopsis protein of unknown function;; Protein of unknown function (DUF793)	--	hypothetical protein MTR_8g074450 [Medicago truncatula]
c80045.graph_c0	6.09125	3.98968	0	0.112139	1.05e-08	-6.43106	down	--	--	--	--	--	--	--	--	--
c80049.graph_c0	0.299284	0.525386	2.89615	4.15252	0.00353368	3.01408	up	--	--	--	--	--	--	--	--	PREDICTED: uncharacterized protein LOC101505266 [Cicer arietinum]
c80079.graph_c0	6.08592	3.77072	0	0	2.49e-11		down	--	--	--	--	--	--	--	--	--
c80104.graph_c0	3.97882	2.97611	0	0.568479	0.000163555	-3.55902	down	--	--	--	--	--	--	--	--	--
c80113.graph_c0	5.52042	3.92485	0	0.151174	6.28e-07	-5.90943	down	--	--	--	--	--	--	--	--	--
c80122.graph_c0	2.81835	2.84979	0.409095	0.493947	0.00302551	-2.72041	down	Cellular Component: vacuole (GO:0005773);; Cellular Component: integral component of plasma membrane (GO:0005887);; Molecular Function: sucrose:hydrogen symporter activity (GO:0008506);; Biological Process: sucrose transport (GO:0015770);; Biological Process: carbohydrate transmembrane transport (GO:0034219);;	--	--	K15378|1.73755e-81|cam:101492994|sucrose transport protein SUC4-like; K15378 solute carrier family 45, member 1/2/4 (A)	[G]	Carbohydrate transport and metabolism	--	Sucrose transport protein SUC4 GN=F21M12.35 OS=Arabidopsis thaliana (Mouse-ear cress) PE=1 SV=2	sucrose transport protein SUF4 [Pisum sativum]
c80136.graph_c0	6.56274	4.87013	0	0.65352	3.34e-05	-4.07466	down	Molecular Function: monooxygenase activity (GO:0004497);; Molecular Function: iron ion binding (GO:0005506);; Molecular Function: electron carrier activity (GO:0009055);; Molecular Function: oxidoreductase activity, acting on paired donors, with incorporation or reduction of molecular oxygen (GO:0016705);; Molecular Function: heme binding (GO:0020037);; Biological Process: oxidation-reduction pro…	--	--	K13083|3.77187e-31|mtr:MTR_144s0009|Flavonoid 3' 5'-hydroxylase; K13083 flavonoid 3',5'-hydroxylase [EC:1.14.13.88] (A)	[Q]	Secondary metabolites biosynthesis, transport and catabolism	Cytochrome P450	Flavonoid 3&apos;,5&apos;-hydroxylase 1 GN=CYP75A1 OS=Petunia hybrida (Petunia) PE=2 SV=1	flavonoid 3&apos; 5&apos; hydroxylase [Pisum sativum]
c80143.graph_c0	6.41785	3.46658	0	0.0360513	1.78e-09	-8.03235	down	--	--	--	--	[S]	Function unknown	PQ loop repeat	--	PQ-loop protein/transmembrane family protein [Medicago truncatula]
c80152.graph_c0	5.71659	4.94048	0.70922	0.321121	0.000284234	-3.49638	down	Biological Process: MAPK cascade (GO:0000165);; Molecular Function: protein serine/threonine kinase activity (GO:0004674);; Molecular Function: protein tyrosine kinase activity (GO:0004713);; Molecular Function: ATP binding (GO:0005524);; Biological Process: regulation of transcription, DNA-templated (GO:0006355);; Biological Process: protein phosphorylation (GO:0006468);; Biological Process: pro…	--	--	--	--	--	--	G-type lectin S-receptor-like serine/threonine-protein kinase RLK1 (Precursor) GN=RLK1 OS=Arabidopsis thaliana (Mouse-ear cress) PE=2 SV=2	PREDICTED: G-type lectin S-receptor-like serine/threonine-protein kinase RLK1-like [Cicer arietinum]
c80225.graph_c0	0	0	2.09977	1.10085	2.37e-07		up	--	--	--	--	--	--	--	--	hypothetical protein MTR_8g045000 [Medicago truncatula]
c80336.graph_c0	9.75584	10.1289	1.34867	2.13728	0.00726678	-2.56662	down	--	[CHR]	--	K15919|1.35855e-19|mtr:MTR_4g013100|Glyoxylate reductase; K15919 hydroxypyruvate reductase 2 (A)	[C]	Energy production and conversion	D-isomer specific 2-hydroxyacid dehydrogenase, NAD binding domain	Hydroxyphenylpyruvate reductase GN=HPPR OS=Plectranthus scutellarioides (Coleus) PE=1 SV=2	Glyoxylate reductase [Medicago truncatula]
c80373.graph_c0	1.26039	1.93601	0	0	1.21e-05		down	Molecular Function: binding (GO:0005488);;	--	--	--	--	--	FAR1 DNA-binding domain;; MULE transposase domain	Protein FAR1-RELATED SEQUENCE 5 GN=FRS5 OS=Arabidopsis thaliana (Mouse-ear cress) PE=2 SV=1	PREDICTED: protein FAR-RED IMPAIRED RESPONSE 1-like [Cicer arietinum]
c80414.graph_c0	0.0799491	0	2.80453	2.62725	5.01e-07	6.08398	up	--	--	--	K09377|7.90309e-09|mis:MICPUN_62122|hypothetical protein; K09377 cysteine and glycine-rich protein (A)	[TZ]	--	LIM domain	LIM domain-containing protein WLIM2b {ECO:0000305} OS=Arabidopsis thaliana (Mouse-ear cress) PE=1 SV=1	unknown [Lotus japonicus]
c80449.graph_c1	4.0761	2.97228	0.0632118	0.973117	0.00341657	-2.72553	down	--	--	--	--	--	--	--	--	--
c80474.graph_c0	3.15982	1.62869	0.0813229	0.294572	0.0010946	-3.65519	down	--	--	--	--	--	--	--	--	--
c80487.graph_c0	0	0	6.76523	3.59711	2.78e-10		up	--	--	--	--	--	--	--	--	--
c80490.graph_c0	0	0	6.48356	2.6211	0.000220678		up	--	--	--	--	--	--	--	--	hypothetical protein glysoja_009452, partial [Glycine soja]
c80498.graph_c0	1.14492	1.40692	0	0.209021	0.000158893	-3.57616	down	--	--	--	--	--	--	--	--	--
c80514.graph_c0	0	0	3.55193	5.69779	2.34e-05		up	--	--	--	--	--	--	--	--	--
c80546.graph_c0	1.82006	1.53364	0.188707	0.113924	0.000189105	-3.57759	down	Molecular Function: DNA binding (GO:0003677);; Molecular Function: chromatin binding (GO:0003682);;	--	--	K09422|1.40696e-73|mtr:MTR_6g012180|MYB family transcription factor-like protein; K09422 myb proto-oncogene protein, plant (A)	[K]	Transcription	--	Myb-related protein 306 OS=Antirrhinum majus (Garden snapdragon) PE=2 SV=1	MYB family transcription factor-like protein [Medicago truncatula]
c80553.graph_c0	0	0	5.35662	5.84578	1.86e-08		up	--	--	--	--	--	--	--	--	--
c80568.graph_c0	0	0	5.03215	5.5422	2.21e-08		up	--	--	--	--	--	--	--	--	--
c80573.graph_c0	0	0	4.27018	2.34777	1.47e-08		up	--	--	--	--	--	--	--	--	--
c80582.graph_c0	0.0712929	0	2.32841	3.59228	0.000111865	6.40527	up	--	--	--	--	--	--	zinc-binding in reverse transcriptase	--	hypothetical protein glysoja_045641, partial [Glycine soja]
c80593.graph_c0	0	0	3.63724	2.34029	3.83e-08		up	--	--	--	--	--	--	--	--	--
c83791.graph_c0	0.0639889	0.0673987	65.9466	36.3079	6.12e-19	9.48187	up	--	--	--	--	--	--	--	--	--
c84220.graph_c0	0.22924	0	17.7468	6.77987	0.00150794	6.68422	up	--	--	--	--	--	--	--	--	--
c87892.graph_c0	0	0	10.8267	8.24655	8.26e-11		up	Biological Process: telomere maintenance (GO:0000723);; Molecular Function: DNA helicase activity (GO:0003678);; Molecular Function: ATP binding (GO:0005524);; Biological Process: DNA repair (GO:0006281);; Biological Process: DNA duplex unwinding (GO:0032508);;	--	--	K15255|1.6134e-07|mtr:MTR_2g060840|Helicase-like protein; K15255 ATP-dependent DNA helicase PIF1 [EC:3.6.4.12] (A)	--	--	--	--	putative beta tubulin [Glycine max]
c89722.graph_c0	0	0	12.0836	3.5489	0.00250884		up	--	--	--	--	--	--	--	--	--
c91958.graph_c0	0	0	8.37721	2.52869	0.00413254		up	--	--	--	--	--	--	--	--	--
c92058.graph_c0	0.750434	0.112917	4.92773	2.93576	0.00102628	3.13348	up	--	[C]	Energy production and conversion	K05894|4.87804e-63|cam:101498570|putative 12-oxophytodienoate reductase 11-like; K05894 12-oxophytodienoic acid reductase [EC:1.3.1.42] (A)	[CR]	--	NADH:flavin oxidoreductase / NADH oxidase family	12-oxophytodienoate reductase 2 GN=OPR2 OS=Arabidopsis thaliana (Mouse-ear cress) PE=1 SV=2	12-oxophytodienoate reductase-like protein [Medicago truncatula]
c92086.graph_c0	5.958	4.90351	0.350133	1.84956	0.00120583	-2.29224	down	--	[E]	Amino acid transport and metabolism	K13508|0|mtr:MTR_7g067380|ER glycerol-phosphate acyltransferase; K13508 glycerol-3-phosphate acyltransferase [EC:2.3.1.15] (A)	--	--	haloacid dehalogenase-like hydrolase;; Acyltransferase	Glycerol-3-phosphate 2-O-acyltransferase 6 GN=GPAT6 OS=Arabidopsis thaliana (Mouse-ear cress) PE=1 SV=1	glycerol-3-phosphate acyltransferase [Medicago truncatula]
c92099.graph_c0	0.270204	0	48.4546	35.8132	5.21e-29	8.26723	up	--	--	--	--	--	--	--	--	--
c92107.graph_c0	0	0	4.37227	8.10725	0.00142994		up	--	--	--	--	--	--	--	--	--
c92112.graph_c0	497.657	537.892	153.295	202.051	0.000594074	-1.61067	down	--	--	--	--	--	--	--	--	phloem specific protein [Pisum sativum]
c92135.graph_c0	0.028076	0.0591441	17.3542	10.7024	3.24e-25	8.18753	up	--	[Q]	Secondary metabolites biosynthesis, transport and catabolism	--	[Q]	Secondary metabolites biosynthesis, transport and catabolism	Cytochrome P450	Cytochrome P450 71A1 GN=CYP71A1 OS=Persea americana (Avocado) PE=1 SV=2	PREDICTED: cytochrome P450 71A1-like [Cicer arietinum]
c92156.graph_c0	11.5313	8.81852	0.217459	1.46285	1.66e-09	-3.57638	down	--	--	--	--	--	--	--	--	--
c92186.graph_c0	20.2958	16.3826	5.50658	5.26358	0.0054198	-1.84415	down	--	--	--	--	--	--	--	--	--
c92221.graph_c0	20.8407	16.5031	1.8831	3.08048	5.32e-07	-2.95304	down	--	--	--	--	[R]	General function prediction only	Zinc finger C-x8-C-x5-C-x3-H type (and similar)	Zinc finger CCCH domain-containing protein 2 OS=Oryza sativa subsp. japonica (Rice) PE=2 SV=1	Zinc finger CCCH domain-containing protein [Medicago truncatula]
c92245.graph_c0	0	0	3.09358	3.33504	6.36e-08		up	--	--	--	--	--	--	--	--	--
c92326.graph_c0	0	0	5.24489	8.54922	6.28e-06		up	--	--	--	--	--	--	--	--	--
[truncated: 80 more rows]
